# Supplementary material for: Exploring a general mechanistic map on NHC-catalyzed activation/transformation reactions of saturated carboxylic anhydrides
Source: Royal Society of Chemistry journal article supplement (doi:10.1039/d3qo00423f), 2023-01-01
Supplement: d3qo00423f1.pdf [file d3qo00423f1.pdf]

Electronic Supplementary Information for

**Exploring the general mechanistic map on NHC-catalyzed  
activation/transformation reactions of saturated carboxylic anhydrides**

Shuang-Liang Liu,<sup>a</sup> Yan Qiao<sup>\*b</sup>, and Yang Wang<sup>\*a</sup>

Contents

|                                                                                                       |     |
|-------------------------------------------------------------------------------------------------------|-----|
| Part 1: Generation of active NHC.....                                                                 | S2  |
| Part 2: Addition modes of NHC and R1 .....                                                            | S3  |
| Part 3: Possible $\beta$ -H elimination pathways.....                                                 | S4  |
| Part 4: Stereochemistry for reaction between M4 and R2.....                                           | S5  |
| Part 5: Configurations of TS5s associated with Michael-type addition process .....                    | S6  |
| Part 6: Energy profiles of reaction between E-M4 and R2 associated with RR, RS, and SR pathways ..... | S7  |
| Part 7: Possible pathways for decarboxylation.....                                                    | S8  |
| Part 8: Barriers for chemoselective pathways .....                                                    | S9  |
| Part 9: NCI analysis for TS5RR and TS5SS .....                                                        | S10 |
| Part 10: Cartesian coordinates for all stationary points .....                                        | S11 |

## Part 1: Generation of active NHC

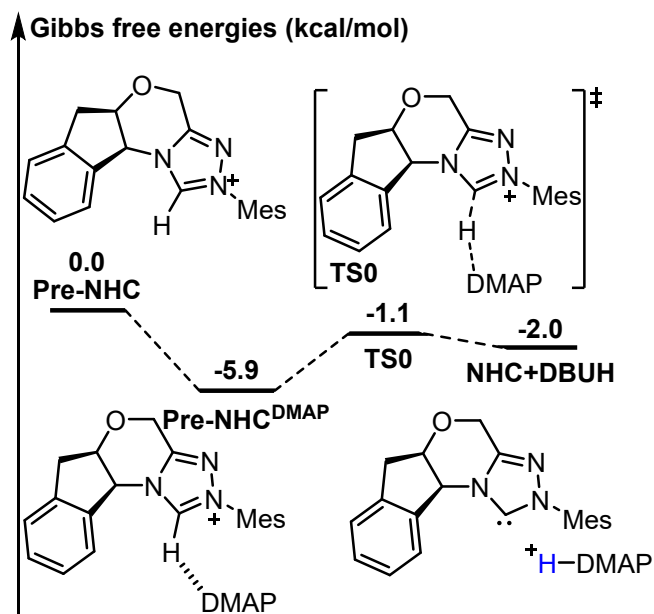

Fig.S1 Deprotonation of pre-NHC for generation of active NHC

## Part 2: Addition modes of NHC and R1

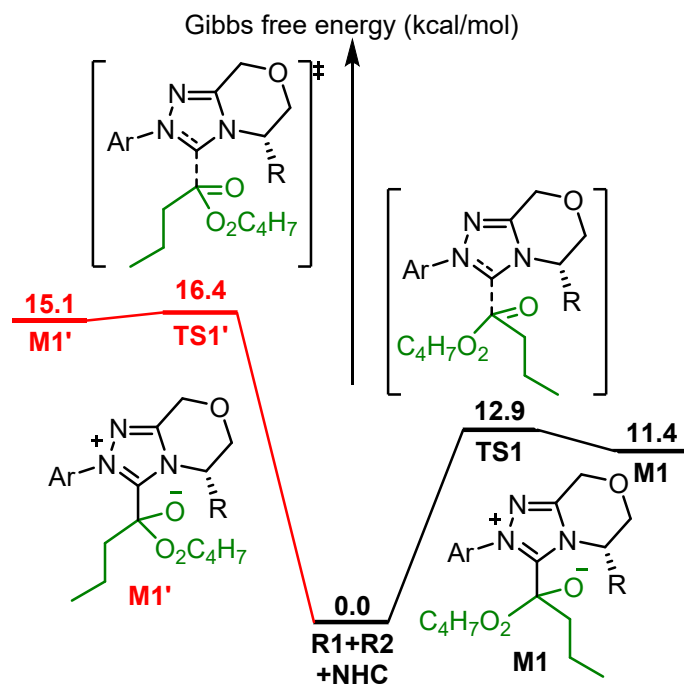

Fig. S2 Energy profile for NHC adsorption process

### Part 3: Possible $\beta$ -H elimination pathways

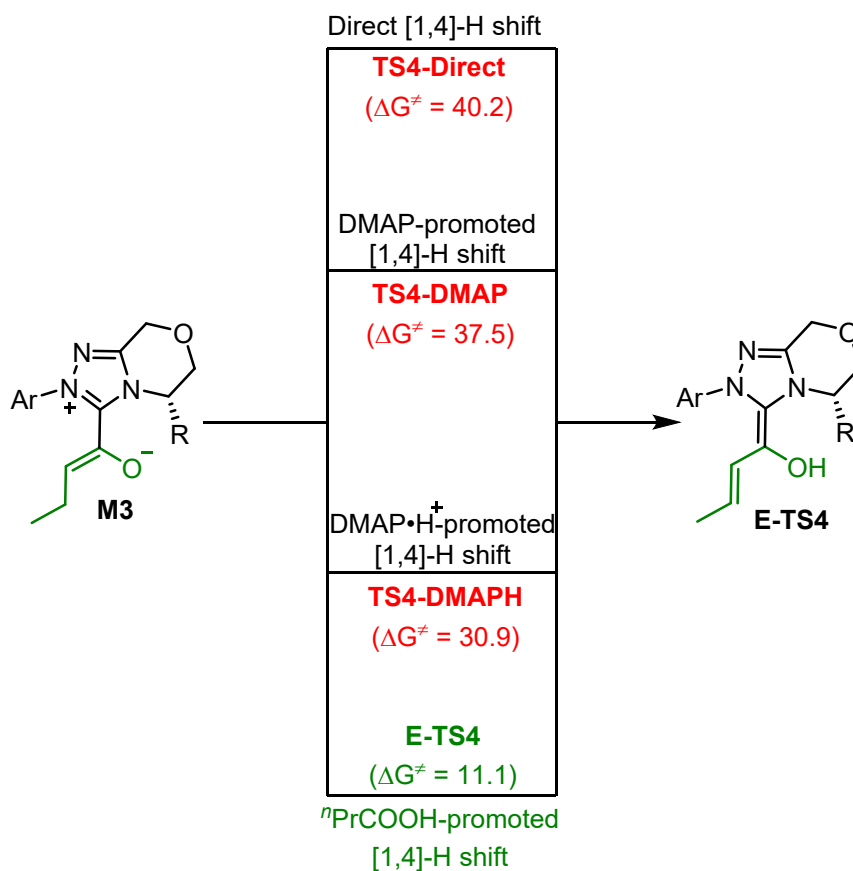

**Scheme S1.** Possible pathways involved in  $\beta$ -H elimination process

## Part 4: Stereochemistry for reaction between M4 and R2

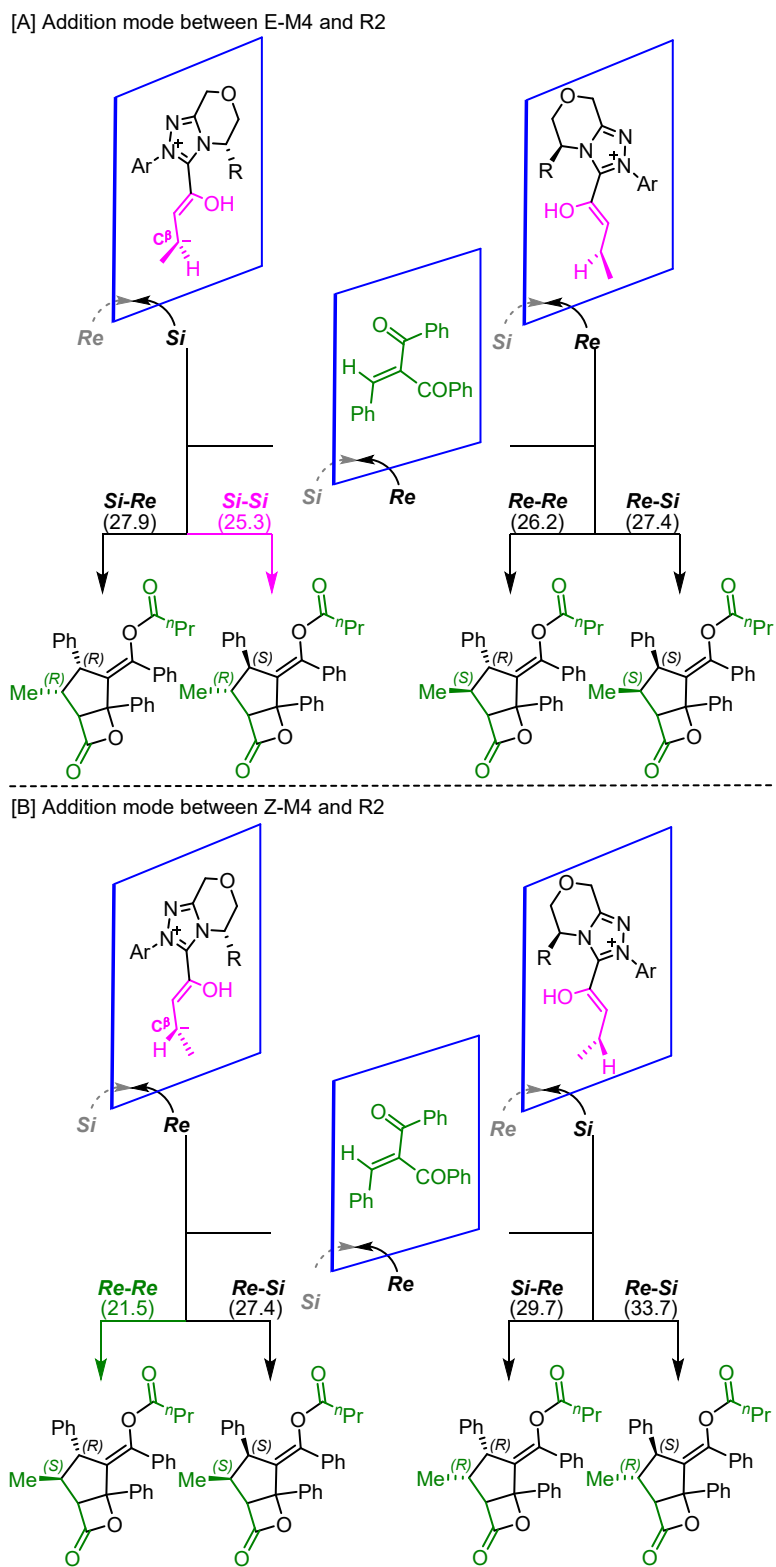

Scheme S2. Illustration of stereochemistry

## Part 5: Configurations of TS5s associated with Michael-type addition process

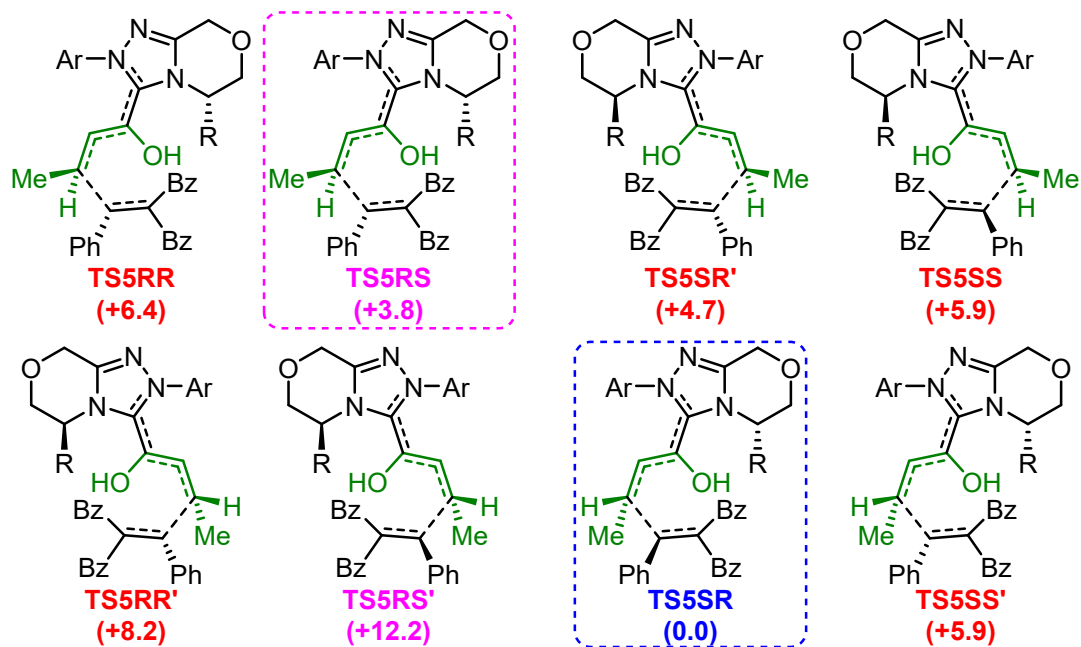

Fig. S3 Configurations involved in C-C bond formation process

## Part 6: Energy profiles of reaction between E-M4 and R2 associated with RR, RS, and SR pathways

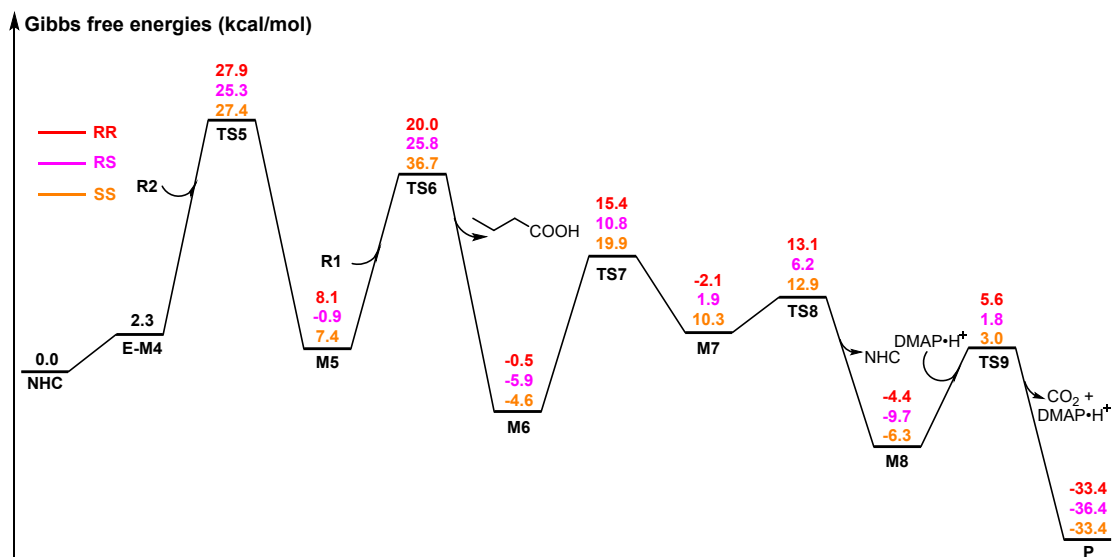

Fig. S4 Energy profiles of reaction between E-M4 and R2 associated with RR, RS, and SR pathways

## Part 7: Possible pathways for decarboxylation

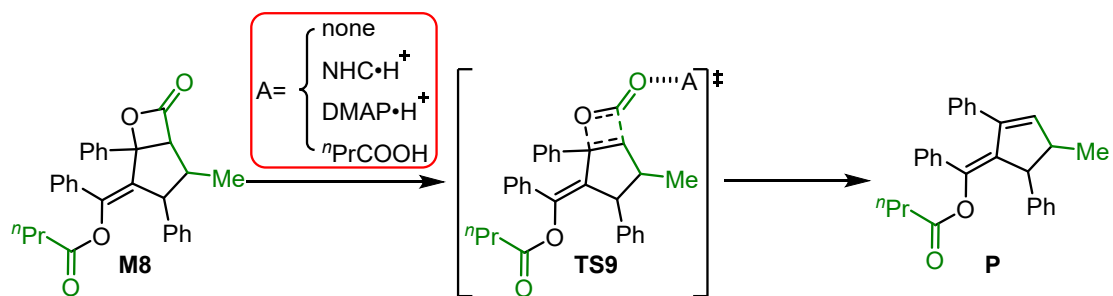

**Scheme S3.** Possible pathways for decarboxylation

**Table S1.** Energy barriers for decarboxylation process (Energy in kcal/mol)

| TS9                 | $\Delta G^\ddagger$ |      |      |      |
|---------------------|---------------------|------|------|------|
|                     | RR                  | RS   | SR   | SS   |
| Direct              | 22.5                | 24.3 | 26.4 | 22.0 |
| NHC·H <sup>+</sup>  | 11.9                | 15.7 | 15.1 | 12.1 |
| DMAP·H <sup>+</sup> | 10.0                | 11.5 | 13.6 | 9.3  |
| <sup>n</sup> PrCOOH | 23.0                | 23.6 | 23.4 | 23.4 |



## Part 8: Barriers for chemoselective pathways

**Table S2.** Energy barriers for HAD pathway (Energy in kcal/mol)

|     | $\Delta G^\ddagger$ |      |      |      |
|-----|---------------------|------|------|------|
|     | RR                  | RS   | SR   | SS   |
| TS4 | 26.8                | 22.2 | 23.4 | 22.3 |

**Table S3.** Energy barriers for Stetter pathway (Energy in kcal/mol)

|                     | TS5  |      |      |      |
|---------------------|------|------|------|------|
|                     | R    | S    | R'   | S'   |
| $\Delta G^\ddagger$ | 23.6 | 22.9 | 25.1 | 26.1 |

## Part 9: NCI analysis for TS5RR and TS5SS

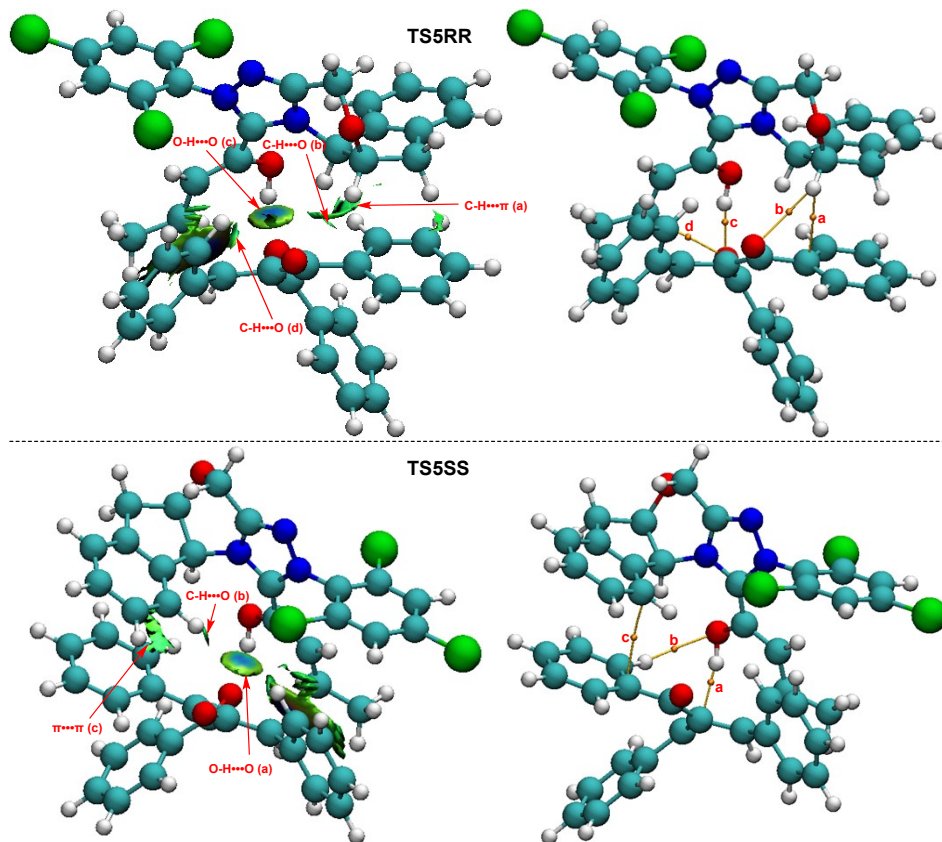

**Fig. S5** NCI analysis and topological analysis of bond critical points (BCPs) along the bond paths for the stereoselective transition states **TS5RR** and **TS5SS**

**Table S4.** Summary of distances and Laplacian of electron density ( $\nabla^2\rho$ ) involved in different types of interactions in **TS5RR** and **TS5SS**

| TS5RR     |                     |              |                                      | TS5SS     |                     |              |                                      |
|-----------|---------------------|--------------|--------------------------------------|-----------|---------------------|--------------|--------------------------------------|
| BCP index | Type of interaction | Distance (Å) | $\nabla^2\rho \times 10^{-1}$ (a.u.) | BCP index | Type of interaction | Distance (Å) | $\nabla^2\rho \times 10^{-1}$ (a.u.) |
| a         | C-H... $\pi$        | 2.89         | 0.2501                               | a         | O-H...O             | 1.85         | 0.9279                               |
| b         | C-H...O             | 2.59         | 0.2709                               | b         | C-H...O             | 2.50         | 0.3144                               |
| c         | O-H...O             | 1.81         | 1.0474                               | c         | $\pi$ ... $\pi$     | 3.18         | 0.2605                               |
| d         | C-H...O             | 2.37         | 0.4414                               | -         | -                   | -            | -                                    |

## Part 10: Cartesian coordinates for all stationary points

Coordinates for substrates

R1

|   |             |             |             |
|---|-------------|-------------|-------------|
| C | -1.18346300 | 0.30565200  | -0.20925500 |
| O | -1.22583500 | 1.40754600  | -0.67009100 |
| O | 0.00001100  | -0.38161000 | -0.00037800 |
| C | 1.18336500  | 0.30538900  | 0.20897600  |
| O | 1.22578800  | 1.40710000  | 0.67033000  |
| C | 2.35821100  | -0.55461800 | -0.17078700 |
| C | 3.69251800  | 0.08767200  | 0.18558300  |
| H | 2.28212100  | -0.74865700 | -1.24831900 |
| H | 2.23409100  | -1.52905900 | 0.31612100  |
| C | 4.86936300  | -0.79421100 | -0.21990700 |
| H | 3.76031000  | 1.06380300  | -0.30438400 |
| H | 3.71738900  | 0.28425100  | 1.26219000  |
| H | 5.82079800  | -0.32577600 | 0.04198300  |
| H | 4.82381200  | -1.76610700 | 0.28136500  |
| H | 4.87046600  | -0.97616700 | -1.29904400 |
| C | -2.35815100 | -0.55452200 | 0.17058500  |
| C | -3.69261900 | 0.08773100  | -0.18532300 |
| H | -2.28177900 | -0.74860100 | 1.24809500  |
| H | -2.23401300 | -1.52888100 | -0.31645100 |
| C | -4.86925000 | -0.79447400 | 0.22014300  |
| H | -3.76040800 | 1.06370400  | 0.30497100  |
| H | -3.71779500 | 0.28458000  | -1.26186900 |
| H | -5.82083900 | -0.32586300 | -0.04087300 |
| H | -4.82393000 | -1.76598000 | -0.28190400 |
| H | -4.86978400 | -0.97725000 | 1.29913800  |

R2

|   |             |             |             |
|---|-------------|-------------|-------------|
| C | -0.75779900 | -1.50591300 | -0.90093700 |
| O | -0.65970800 | -2.05539600 | -1.98432900 |
| C | 0.43446200  | -0.82928700 | -0.28126800 |
| C | 1.64963200  | -1.29703600 | -0.61804400 |
| H | 1.65321300  | -2.17775900 | -1.25986000 |
| C | -2.06525000 | -1.48662500 | -0.17662000 |
| C | -2.14285100 | -1.43444600 | 1.21820400  |
| C | -3.23484500 | -1.57647200 | -0.93726200 |
| C | -3.38656800 | -1.46022300 | 1.84275200  |
| H | -1.23877800 | -1.39760100 | 1.81781600  |
| C | -4.47402100 | -1.58409600 | -0.31148500 |
| H | -3.14819500 | -1.63664900 | -2.01732000 |
| C | -4.54979500 | -1.52538300 | 1.08013300  |

|   |             |             |             |
|---|-------------|-------------|-------------|
| H | -3.44597700 | -1.43113000 | 2.92561000  |
| H | -5.38150700 | -1.63847000 | -0.90381000 |
| H | -5.51809700 | -1.53525700 | 1.57062200  |
| C | 2.97062300  | -0.77378300 | -0.24587900 |
| C | 4.04031700  | -1.67399900 | -0.15963100 |
| C | 3.21413400  | 0.58836500  | -0.02317700 |
| C | 5.31289400  | -1.23440200 | 0.18603600  |
| H | 3.86293500  | -2.72771600 | -0.35614000 |
| C | 4.48882600  | 1.02893200  | 0.30801500  |
| H | 2.41197400  | 1.31067200  | -0.13867900 |
| C | 5.53879900  | 0.11909800  | 0.42307200  |
| H | 6.12854700  | -1.94584500 | 0.26206500  |
| H | 4.66600300  | 2.08692700  | 0.47068500  |
| H | 6.53276000  | 0.46718000  | 0.68484700  |
| C | 0.22484600  | 0.33028500  | 0.65927600  |
| O | 0.63730500  | 0.29399300  | 1.80273800  |
| C | -0.51300900 | 1.51866200  | 0.13379400  |
| C | -0.78590400 | 1.66839700  | -1.22918300 |
| C | -0.91429600 | 2.50590100  | 1.03915800  |
| C | -1.46102800 | 2.79824800  | -1.68114500 |
| H | -0.46018000 | 0.91220200  | -1.93835700 |
| C | -1.59283600 | 3.62865600  | 0.58607600  |
| H | -0.68505000 | 2.36714700  | 2.09059200  |
| C | -1.86646400 | 3.77440900  | -0.77469300 |
| H | -1.66906200 | 2.91683300  | -2.73918800 |
| H | -1.91156300 | 4.39181600  | 1.28849500  |
| H | -2.39701400 | 4.65314300  | -1.12781800 |

NHC·H<sup>+</sup>

|   |             |             |             |
|---|-------------|-------------|-------------|
| C | -3.35255900 | 0.51355800  | 0.92560500  |
| C | -4.07003900 | 0.82056800  | -0.23509100 |
| C | -4.62850400 | 2.08371300  | -0.38739700 |
| C | -4.45211400 | 3.02333500  | 0.62840600  |
| C | -3.73941500 | 2.70816800  | 1.78649900  |
| C | -3.18386600 | 1.44002400  | 1.94813100  |
| C | -2.85197300 | -0.90251700 | 0.84971000  |
| C | -3.77359700 | -1.53196000 | -0.22276600 |
| C | -4.11739600 | -0.36323200 | -1.17194100 |
| H | -5.19832200 | 2.33527900  | -1.27617100 |
| H | -4.88677600 | 4.01163200  | 0.52197900  |
| H | -3.62959400 | 3.44975200  | 2.57001300  |
| H | -2.65511700 | 1.18143700  | 2.86169900  |
| H | -4.68259700 | -1.85143000 | 0.29106400  |
| H | -3.36718000 | -0.25058500 | -1.96456900 |

|    |             |             |             |
|----|-------------|-------------|-------------|
| H  | -2.84030000 | -1.45742000 | 1.78953600  |
| H  | -5.08568400 | -0.50333600 | -1.65532700 |
| C  | -1.07466300 | -1.69462100 | -0.78676300 |
| C  | -0.38622000 | -0.28704200 | 0.71211100  |
| N  | 0.19144700  | -1.51553600 | -1.04503800 |
| N  | -1.46535900 | -0.94838300 | 0.29800500  |
| N  | 0.60271600  | -0.63516200 | -0.09675300 |
| C  | -2.06170600 | -2.53201800 | -1.54464500 |
| H  | -2.25788000 | -2.06081500 | -2.51576700 |
| H  | -1.63866100 | -3.52182500 | -1.72279300 |
| C  | 1.95454300  | -0.18329500 | -0.05349900 |
| C  | 2.32779900  | 0.96194300  | -0.75925700 |
| C  | 2.90760700  | -0.90674700 | 0.66525200  |
| C  | 3.64538300  | 1.39582500  | -0.74081700 |
| C  | 4.22952700  | -0.48630200 | 0.69285000  |
| C  | 4.57885300  | 0.66211700  | -0.01323100 |
| H  | 3.93702300  | 2.28429600  | -1.28714900 |
| H  | 4.97148300  | -1.04532700 | 1.24992200  |
| Cl | 1.14001200  | 1.84325700  | -1.65275000 |
| Cl | 6.22281000  | 1.19086700  | 0.01228700  |
| Cl | 2.43289200  | -2.32670400 | 1.52617600  |
| O  | -3.23511700 | -2.70536200 | -0.78848100 |
| H  | -0.32420400 | 0.40956700  | 1.53581800  |

DMAP

|   |             |             |             |
|---|-------------|-------------|-------------|
| C | -1.94825400 | 1.12930800  | -0.00032900 |
| C | -0.56393400 | 1.19675400  | -0.00047700 |
| C | 0.18346700  | -0.00000800 | -0.00019200 |
| C | -0.56389800 | -1.19673500 | 0.00030800  |
| C | -1.94826500 | -1.12927800 | 0.00042700  |
| N | -2.66376500 | -0.00001600 | 0.00011800  |
| H | -2.51983700 | 2.05564500  | -0.00054500 |
| H | -0.08181900 | 2.16586500  | -0.00097300 |
| H | -0.08183500 | -2.16587300 | 0.00078100  |
| H | -2.51978900 | -2.05566000 | 0.00081400  |
| N | 1.54976800  | 0.00000600  | -0.00048300 |
| C | 2.26934700  | -1.25760800 | -0.00049800 |
| H | 3.33975000  | -1.05616900 | -0.00266400 |
| H | 2.03518700  | -1.85539800 | 0.88877400  |
| H | 2.03202900  | -1.85673700 | -0.88798000 |
| C | 2.26939000  | 1.25759200  | 0.00085700  |
| H | 3.33978600  | 1.05610800  | 0.00232800  |
| H | 2.03494500  | 1.85637700  | -0.88765500 |
| H | 2.03244100  | 1.85576400  | 0.88909500  |

## NHC

|    |             |             |             |
|----|-------------|-------------|-------------|
| C  | -3.35313800 | 0.51615000  | 0.90241300  |
| C  | -4.22804800 | 0.73546300  | -0.16327200 |
| C  | -4.88789200 | 1.95348800  | -0.28470000 |
| C  | -4.65041200 | 2.94443200  | 0.66669300  |
| C  | -3.76355300 | 2.72436500  | 1.72209300  |
| C  | -3.10418200 | 1.50333800  | 1.84752200  |
| C  | -2.77001900 | -0.87349100 | 0.83213500  |
| C  | -3.73566600 | -1.58719800 | -0.14927300 |
| C  | -4.28626100 | -0.47216600 | -1.06587700 |
| H  | -5.57690500 | 2.13124400  | -1.10512300 |
| H  | -5.16052300 | 3.89916700  | 0.58543100  |
| H  | -3.58890900 | 3.50925700  | 2.45061300  |
| H  | -2.40132500 | 1.32511100  | 2.65469700  |
| H  | -4.56238500 | -1.98445100 | 0.44527700  |
| H  | -3.64218500 | -0.31765300 | -1.94022000 |
| H  | -2.72544700 | -1.37401900 | 1.80244800  |
| H  | -5.28835000 | -0.70406300 | -1.43383000 |
| C  | -1.05296700 | -1.60574600 | -0.83730900 |
| C  | -0.34623700 | -0.20347200 | 0.79283100  |
| N  | 0.20704100  | -1.44882600 | -1.09783400 |
| N  | -1.41704900 | -0.87646100 | 0.26769500  |
| N  | 0.60207500  | -0.58947900 | -0.08909000 |
| C  | -2.04569700 | -2.43276600 | -1.59425200 |
| H  | -2.33207300 | -1.91802800 | -2.52096000 |
| H  | -1.60035700 | -3.39135200 | -1.86517900 |
| C  | 1.95330300  | -0.17473100 | -0.05323400 |
| C  | 2.37193700  | 0.94765400  | -0.77069400 |
| C  | 2.90184500  | -0.88348600 | 0.68651600  |
| C  | 3.69564600  | 1.36838200  | -0.74931900 |
| C  | 4.23238100  | -0.48511800 | 0.72760800  |
| C  | 4.60766600  | 0.64030900  | 0.00443300  |
| H  | 4.00366900  | 2.24305400  | -1.30820500 |
| H  | 4.95623900  | -1.04275800 | 1.30862300  |
| Cl | 1.21769100  | 1.84263900  | -1.70059700 |
| Cl | 6.26855400  | 1.15186100  | 0.04171500  |
| Cl | 2.41475300  | -2.28666300 | 1.57538300  |
| O  | -3.17189000 | -2.71222800 | -0.78817200 |

DMAP·H<sup>+</sup>

|   |             |             |             |
|---|-------------|-------------|-------------|
| C | 1.87770200  | -1.17900800 | 0.00019100  |
| C | 0.51479400  | -1.21657200 | 0.00004300  |
| C | -0.23602600 | -0.00005200 | -0.00015400 |

|   |             |             |             |
|---|-------------|-------------|-------------|
| C | 0.51475800  | 1.21651400  | -0.00025500 |
| C | 1.87765400  | 1.17903100  | -0.00010200 |
| N | 2.54200800  | 0.00000700  | 0.00006900  |
| H | 2.48525400  | -2.07482100 | 0.00028700  |
| H | 0.02823700  | -2.18125800 | 0.00008700  |
| H | 0.02809900  | 2.18115500  | -0.00057000 |
| H | 2.48520700  | 2.07484200  | -0.00025700 |
| N | -1.56912300 | -0.00000800 | -0.00030400 |
| C | -2.30533700 | 1.26350000  | 0.00041100  |
| H | -3.37112900 | 1.04984200  | 0.00117300  |
| H | -2.06851100 | 1.84953800  | 0.89293000  |
| H | -2.06976800 | 1.84977800  | -0.89231100 |
| C | -2.30547400 | -1.26344300 | -0.00012200 |
| H | -3.37124600 | -1.04967900 | -0.00053800 |
| H | -2.06908300 | -1.84986300 | -0.89251800 |
| H | -2.06961000 | -1.84939100 | 0.89272400  |
| H | 3.55392600  | 0.00003500  | 0.00056200  |

Pre-NHC<sup>DMAP</sup>

|   |            |             |             |
|---|------------|-------------|-------------|
| C | 3.70452900 | 1.34000200  | -0.71907000 |
| C | 4.49030500 | 1.61678100  | 0.40320100  |
| C | 4.51484100 | 2.90426400  | 0.92658000  |
| C | 3.73860400 | 3.89139100  | 0.31983600  |
| C | 2.95022500 | 3.60451400  | -0.79638100 |
| C | 2.92828100 | 2.31758300  | -1.33146400 |
| C | 3.82717500 | -0.11576700 | -1.08004700 |
| C | 5.11890500 | -0.55021900 | -0.34814200 |
| C | 5.20579500 | 0.37700600  | 0.88517100  |
| H | 5.12747300 | 3.14090000  | 1.79072100  |
| H | 3.75302400 | 4.90090400  | 0.71720200  |
| H | 2.36215500 | 4.39026100  | -1.25837000 |
| H | 2.32505600 | 2.09294900  | -2.20734500 |
| H | 5.95346500 | -0.32948500 | -1.01692500 |
| H | 4.68329400 | -0.04848900 | 1.75112400  |
| H | 3.83974300 | -0.33792100 | -2.14837300 |
| H | 6.24015800 | 0.55469300  | 1.18540000  |
| C | 2.84376900 | -1.97110100 | 0.35212500  |
| C | 1.40479300 | -0.64042500 | -0.59164000 |
| N | 1.67901600 | -2.39652200 | 0.75755000  |
| N | 2.70871200 | -0.88932800 | -0.48232100 |
| N | 0.79876600 | -1.55365100 | 0.15362200  |
| C | 4.20404100 | -2.47541500 | 0.73320100  |
| H | 4.39786100 | -2.22634900 | 1.78389800  |
| H | 4.23759800 | -3.56097700 | 0.62884200  |

|     |             |             |             |
|-----|-------------|-------------|-------------|
| C   | -0.60647800 | -1.62840500 | 0.37386300  |
| C   | -1.20006300 | -0.79607700 | 1.32531000  |
| C   | -1.39680900 | -2.47869100 | -0.39848200 |
| C   | -2.57677400 | -0.79213000 | 1.49413100  |
| C   | -2.77483800 | -2.50206600 | -0.22988000 |
| C   | -3.34270100 | -1.64952000 | 0.71010900  |
| H   | -3.03870900 | -0.13359500 | 2.21977100  |
| H   | -3.39029400 | -3.15958500 | -0.83141500 |
| Cl  | -0.21295700 | 0.23671600  | 2.29634300  |
| Cl  | -5.06376300 | -1.63299900 | 0.89314900  |
| Cl  | -0.66084900 | -3.47792300 | -1.60097200 |
| O   | 5.18249300  | -1.94255500 | -0.12842900 |
| H   | 0.87042100  | 0.15695400  | -1.13293100 |
| C   | -0.98769700 | 2.14115100  | -0.47047500 |
| C   | -2.24000300 | 2.53429700  | -0.03578000 |
| C   | -3.38926500 | 1.90566000  | -0.56992500 |
| C   | -3.15337000 | 0.89922500  | -1.53781700 |
| C   | -1.85383100 | 0.58497000  | -1.88459500 |
| N   | -0.76247200 | 1.17990800  | -1.37756600 |
| H   | -0.10278000 | 2.62684600  | -0.06215800 |
| H   | -2.31762200 | 3.32584300  | 0.69775400  |
| H   | -3.96913900 | 0.36597300  | -2.00928500 |
| H   | -1.67403800 | -0.19863600 | -2.61919900 |
| N   | -4.64449000 | 2.24377200  | -0.17736800 |
| C   | -5.79263600 | 1.69987800  | -0.88517500 |
| H   | -6.70227400 | 2.11786500  | -0.45757800 |
| H   | -5.76342900 | 1.95143900  | -1.95193500 |
| H   | -5.83959000 | 0.61114100  | -0.78193200 |
| C   | -4.83290500 | 3.32533400  | 0.77464800  |
| H   | -5.89383200 | 3.41933900  | 0.99983000  |
| H   | -4.30614600 | 3.11506100  | 1.71119700  |
| H   | -4.47374200 | 4.28411600  | 0.38105700  |
| TS0 |             |             |             |
| C   | 3.24083800  | 1.68084000  | -0.22488700 |
| C   | 4.23292500  | 1.58270100  | 0.75488500  |
| C   | 4.32699800  | 2.54894500  | 1.74923900  |
| C   | 3.41700700  | 3.60521700  | 1.74935500  |
| C   | 2.43174500  | 3.70212400  | 0.76506000  |
| C   | 2.33725300  | 2.73682400  | -0.23744800 |
| C   | 3.34090100  | 0.51239700  | -1.17204100 |
| C   | 4.78850200  | 0.01493700  | -0.93602000 |
| C   | 5.08696800  | 0.35767600  | 0.54076100  |
| H   | 5.09903700  | 2.48690000  | 2.50987800  |



|    |             |             |             |
|----|-------------|-------------|-------------|
| H  | 3.48391700  | 4.36926300  | 2.51696700  |
| H  | 1.74499300  | 4.54256300  | 0.77101600  |
| H  | 1.58313100  | 2.81908300  | -1.01582500 |
| H  | 5.44087500  | 0.61465900  | -1.57448000 |
| H  | 4.77101200  | -0.44663800 | 1.21640200  |
| H  | 3.13824000  | 0.74875900  | -2.21868900 |
| H  | 6.15133900  | 0.52904100  | 0.71270900  |
| C  | 2.81920300  | -1.86868600 | -0.51472900 |
| C  | 1.09834600  | -0.47875800 | -0.55858400 |
| N  | 1.80856400  | -2.59834000 | -0.14606100 |
| N  | 2.42438700  | -0.57595200 | -0.76918000 |
| N  | 0.76301700  | -1.71772900 | -0.18734200 |
| C  | 4.25503500  | -2.28442500 | -0.63056800 |
| H  | 4.66884000  | -2.45279500 | 0.37152000  |
| H  | 4.32328500  | -3.22040500 | -1.18722300 |
| C  | -0.53736900 | -2.12100400 | 0.21624600  |
| C  | -1.06866700 | -1.66953100 | 1.42742100  |
| C  | -1.30204400 | -2.96752100 | -0.58945500 |
| C  | -2.33838400 | -2.05451000 | 1.83611200  |
| C  | -2.56970300 | -3.37351000 | -0.19375500 |
| C  | -3.06974000 | -2.90892800 | 1.01817700  |
| H  | -2.74163700 | -1.70305900 | 2.77781900  |
| H  | -3.15420000 | -4.03521000 | -0.82111900 |
| Cl | -0.13736300 | -0.62413800 | 2.44680200  |
| Cl | -4.65006800 | -3.40550000 | 1.52161500  |
| Cl | -0.67490900 | -3.49948500 | -2.10967400 |
| O  | 4.98996000  | -1.31821100 | -1.34695100 |
| H  | 0.14964600  | 0.52818000  | -0.59229700 |
| C  | -1.08037900 | 2.27569200  | 0.30855000  |
| C  | -2.18969000 | 3.08663400  | 0.29945300  |
| C  | -3.17637300 | 2.91754100  | -0.70961500 |
| C  | -2.94399600 | 1.88317400  | -1.65585500 |
| C  | -1.80244300 | 1.12479300  | -1.55997700 |
| N  | -0.87647400 | 1.31180100  | -0.60553000 |
| H  | -0.30720200 | 2.38760200  | 1.06339700  |
| H  | -2.28922500 | 3.84416000  | 1.06460500  |
| H  | -3.64590300 | 1.67623400  | -2.45182300 |
| H  | -1.59855600 | 0.32608900  | -2.26963000 |
| N  | -4.27405800 | 3.69680200  | -0.76685400 |
| C  | -5.25113100 | 3.50528300  | -1.83019600 |
| H  | -6.03925100 | 4.24739100  | -1.72239100 |
| H  | -4.79072100 | 3.63391600  | -2.81502900 |
| H  | -5.70464500 | 2.50995600  | -1.77744500 |
| C  | -4.48273400 | 4.73861900  | 0.22910900  |

|   |             |            |            |
|---|-------------|------------|------------|
| H | -5.42328700 | 5.24384100 | 0.02014700 |
| H | -4.53753500 | 4.31484100 | 1.23700300 |
| H | -3.67850100 | 5.48118100 | 0.19881500 |

Coordinates for the formation of enolate M3

TS1

|    |             |             |             |
|----|-------------|-------------|-------------|
| C  | 3.61897000  | -0.63362700 | 0.53459000  |
| C  | 4.91182100  | -0.97821300 | 0.15221700  |
| C  | 5.50368700  | -2.12760800 | 0.66932700  |
| C  | 4.77630400  | -2.91064200 | 1.56344600  |
| C  | 3.48022400  | -2.55048900 | 1.94312700  |
| C  | 2.88275300  | -1.40074700 | 1.43204500  |
| C  | 3.16161800  | 0.62888400  | -0.16114300 |
| C  | 4.27698800  | 0.91077300  | -1.23265900 |
| C  | 5.48085900  | 0.03585100  | -0.80907000 |
| H  | 6.51070300  | -2.41206700 | 0.37829900  |
| H  | 5.22226400  | -3.81300900 | 1.97029400  |
| H  | 2.93301600  | -3.17260800 | 2.64392800  |
| H  | 1.88288300  | -1.08613000 | 1.72470000  |
| H  | 4.53101700  | 1.97136500  | -1.24686700 |
| H  | 5.94642100  | -0.40767400 | -1.69489300 |
| H  | 3.04129900  | 1.45092100  | 0.54649600  |
| H  | 6.24212700  | 0.65185200  | -0.31839600 |
| C  | 1.79856500  | -0.28389200 | -1.99457500 |
| C  | 0.62384100  | 0.62684800  | -0.33968000 |
| N  | 0.57088400  | -0.53047000 | -2.32302600 |
| N  | 1.86779100  | 0.41243600  | -0.81342600 |
| N  | -0.13679800 | 0.03954300  | -1.28347100 |
| C  | 3.08198600  | -0.53439800 | -2.71470200 |
| H  | 3.59015200  | -1.41820600 | -2.30427800 |
| H  | 2.90193100  | -0.68636900 | -3.77895600 |
| C  | -1.54021000 | -0.15947800 | -1.23448500 |
| C  | -2.05734200 | -1.42982800 | -0.95124600 |
| C  | -2.43101200 | 0.88097600  | -1.50715500 |
| C  | -3.43034100 | -1.64755700 | -0.90251200 |
| C  | -3.80635600 | 0.68739300  | -1.45382600 |
| C  | -4.28579400 | -0.58068700 | -1.14948200 |
| H  | -3.81940600 | -2.63442400 | -0.68125500 |
| H  | -4.48326000 | 1.50508100  | -1.66810600 |
| Cl | -0.99451600 | -2.76117500 | -0.67502000 |
| Cl | -6.00198700 | -0.84467900 | -1.09869200 |
| Cl | -1.83068700 | 2.43285000  | -1.98000400 |
| O  | 3.86110500  | 0.63807100  | -2.56493200 |
| C  | 0.42163800  | 1.58135400  | 1.41119600  |

|    |             |             |             |
|----|-------------|-------------|-------------|
| O  | 1.30385100  | 1.17000900  | 2.15419600  |
| O  | -0.95983600 | 1.21118800  | 1.66653000  |
| C  | -1.25150600 | -0.07258800 | 1.93612900  |
| O  | -0.47083100 | -0.98986100 | 1.84800000  |
| C  | -2.71325500 | -0.22948900 | 2.28740500  |
| C  | -3.09767000 | -1.67193800 | 2.58870700  |
| H  | -3.29124500 | 0.15986500  | 1.43723300  |
| H  | -2.93936100 | 0.43610100  | 3.12825200  |
| C  | -4.60939400 | -1.83886500 | 2.69914100  |
| H  | -2.69807500 | -2.31766500 | 1.79920500  |
| H  | -2.60478100 | -1.99244000 | 3.51229800  |
| H  | -4.88469600 | -2.87855400 | 2.89202000  |
| H  | -5.01786000 | -1.22617200 | 3.50889800  |
| H  | -5.09850700 | -1.52366700 | 1.77037200  |
| C  | 0.39754600  | 3.02537900  | 0.93631800  |
| C  | 0.23901900  | 3.96330900  | 2.13568700  |
| H  | -0.40744100 | 3.18192800  | 0.21478000  |
| H  | 1.34993500  | 3.22800300  | 0.43192900  |
| C  | 0.24566900  | 5.43042200  | 1.71790700  |
| H  | -0.69766300 | 3.72423100  | 2.65138500  |
| H  | 1.04926100  | 3.76224600  | 2.84339000  |
| H  | 0.13413600  | 6.09074300  | 2.58183100  |
| H  | 1.18321100  | 5.69061000  | 1.21609400  |
| H  | -0.57291100 | 5.64441900  | 1.02335800  |
| MI |             |             |             |
| C  | 3.63731500  | -0.69976300 | 0.51258200  |
| C  | 4.92563800  | -0.99928200 | 0.07827800  |
| C  | 5.51492100  | -2.20822600 | 0.43799100  |
| C  | 4.78741000  | -3.09782900 | 1.22578200  |
| C  | 3.49506700  | -2.78405600 | 1.65574300  |
| C  | 2.90080300  | -1.57315100 | 1.30759000  |
| C  | 3.19483900  | 0.64998900  | -0.00565100 |
| C  | 4.29657600  | 1.05460900  | -1.04904300 |
| C  | 5.49589600  | 0.12519200  | -0.75015400 |
| H  | 6.51907500  | -2.45648900 | 0.10690500  |
| H  | 5.23065900  | -4.04761900 | 1.50915600  |
| H  | 2.94812400  | -3.49092900 | 2.27121100  |
| H  | 1.90504900  | -1.29137500 | 1.64508200  |
| H  | 4.55776800  | 2.10706900  | -0.93309700 |
| H  | 5.95130300  | -0.20585600 | -1.68891900 |
| H  | 3.07797400  | 1.37184200  | 0.80260200  |
| H  | 6.26570600  | 0.66918200  | -0.19251500 |
| C  | 1.79629100  | 0.00074400  | -1.93037500 |

|    |             |             |             |
|----|-------------|-------------|-------------|
| C  | 0.64573400  | 0.68608600  | -0.18805800 |
| N  | 0.56206900  | -0.17420200 | -2.28265900 |
| N  | 1.88681200  | 0.52907400  | -0.67015200 |
| N  | -0.14727600 | 0.24988300  | -1.18457900 |
| C  | 3.07038600  | -0.17872000 | -2.68787700 |
| H  | 3.56408600  | -1.11572200 | -2.39537000 |
| H  | 2.87466500  | -0.19473300 | -3.75998200 |
| C  | -1.55287600 | 0.01817600  | -1.18678900 |
| C  | -2.03647800 | -1.29180100 | -1.07268000 |
| C  | -2.46284100 | 1.06067000  | -1.37137800 |
| C  | -3.40473100 | -1.54123600 | -1.05158100 |
| C  | -3.83272900 | 0.83037400  | -1.34541100 |
| C  | -4.28353200 | -0.47211300 | -1.17019800 |
| H  | -3.77181100 | -2.55552900 | -0.95068700 |
| H  | -4.52808100 | 1.64985400  | -1.47682200 |
| Cl | -0.95347900 | -2.63118400 | -0.99678600 |
| Cl | -5.99193500 | -0.77463200 | -1.12760000 |
| Cl | -1.89867200 | 2.65979700  | -1.70617800 |
| O  | 3.86603100  | 0.95417600  | -2.40208400 |
| C  | 0.43324100  | 1.35048900  | 1.24932700  |
| O  | 1.29433600  | 0.92673300  | 2.07794600  |
| O  | -1.02823700 | 1.01063900  | 1.56345800  |
| C  | -1.29839900 | -0.26853800 | 1.80631700  |
| O  | -0.52629200 | -1.18323600 | 1.60670100  |
| C  | -2.72596000 | -0.46502700 | 2.27100000  |
| C  | -3.09807200 | -1.93270400 | 2.43684500  |
| H  | -3.37280500 | 0.02395400  | 1.52901300  |
| H  | -2.86710700 | 0.09678000  | 3.20150700  |
| C  | -4.59934000 | -2.11903600 | 2.62919600  |
| H  | -2.75516200 | -2.48659600 | 1.55575900  |
| H  | -2.54469300 | -2.35170500 | 3.28344100  |
| H  | -4.85704400 | -3.17171900 | 2.77004500  |
| H  | -4.95824100 | -1.56536400 | 3.50254800  |
| H  | -5.14968400 | -1.75087600 | 1.75559600  |
| C  | 0.36362800  | 2.88068100  | 1.05298100  |
| C  | 0.28966400  | 3.57983600  | 2.40669100  |
| H  | -0.48770900 | 3.16161200  | 0.42847300  |
| H  | 1.27892300  | 3.18946600  | 0.52742600  |
| C  | 0.29716400  | 5.09951600  | 2.27063400  |
| H  | -0.62014300 | 3.25070200  | 2.92051700  |
| H  | 1.13243900  | 3.23701100  | 3.01247200  |
| H  | 0.24527400  | 5.58735300  | 3.24783700  |
| H  | 1.20976700  | 5.44471500  | 1.77314300  |
| H  | -0.55450300 | 5.44825500  | 1.67724400  |

TS1'

|   |             |             |             |
|---|-------------|-------------|-------------|
| C | -0.18759600 | 1.40215400  | -0.07069000 |
| O | -0.34955100 | 1.34060700  | 1.14091700  |
| O | 1.19593200  | 1.67920100  | -0.52973400 |
| C | 1.66683600  | 2.90731700  | -0.24360400 |
| O | 0.98187400  | 3.82784900  | 0.13152800  |
| C | 3.16198100  | 2.97364900  | -0.46188600 |
| C | 3.74164200  | 4.35244700  | -0.17594600 |
| H | 3.36725900  | 2.66317800  | -1.49452900 |
| H | 3.61640100  | 2.20736800  | 0.18052500  |
| C | 5.25300000  | 4.38750400  | -0.38006000 |
| H | 3.25150400  | 5.08715900  | -0.82273700 |
| H | 3.48815300  | 4.63581600  | 0.85024300  |
| H | 5.65859900  | 5.38026900  | -0.17075000 |
| H | 5.75452900  | 3.67363900  | 0.28105800  |
| H | 5.51724300  | 4.12813200  | -1.41031600 |
| C | -1.21394700 | 2.03930300  | -1.01643300 |
| C | -2.44128600 | 2.54362700  | -0.26196900 |
| H | -1.50251200 | 1.31865700  | -1.78800100 |
| H | -0.72886700 | 2.87645500  | -1.52821500 |
| C | -3.52915500 | 3.02692600  | -1.21570000 |
| H | -2.82946300 | 1.74751500  | 0.38183900  |
| H | -2.13085000 | 3.34886900  | 0.41070100  |
| H | -4.41799800 | 3.35799200  | -0.67126700 |
| H | -3.17818800 | 3.86340300  | -1.82858200 |
| H | -3.83324800 | 2.22437100  | -1.89812100 |
| C | 3.11504800  | -0.92926800 | 0.36559800  |
| C | 4.29817700  | -1.66056000 | 0.31725800  |
| C | 5.10616700  | -1.74581700 | 1.44789500  |
| C | 4.69980100  | -1.09908700 | 2.61333200  |
| C | 3.49675700  | -0.38929300 | 2.65791000  |
| C | 2.68363000  | -0.29909300 | 1.52996600  |
| C | 2.40856600  | -0.95829900 | -0.97112100 |
| C | 3.15419200  | -2.07322700 | -1.78514300 |
| C | 4.49741700  | -2.28140500 | -1.04350400 |
| H | 6.03039100  | -2.31573600 | 1.42696700  |
| H | 5.31831300  | -1.15931800 | 3.50332000  |
| H | 3.18826900  | 0.08930300  | 3.58157700  |
| H | 1.72620500  | 0.22025100  | 1.55751400  |
| H | 3.31113300  | -1.74704700 | -2.81431000 |
| H | 4.73570900  | -3.34883000 | -1.00242000 |
| H | 2.46312000  | 0.00606800  | -1.47683900 |
| H | 5.31115700  | -1.78964900 | -1.58706300 |

|     |             |             |             |
|-----|-------------|-------------|-------------|
| C   | 0.60334600  | -2.58154100 | -0.60551300 |
| C   | -0.06532700 | -0.46059800 | -0.65275200 |
| N   | -0.66569400 | -2.65487500 | -0.35396700 |
| N   | 0.99554500  | -1.28050900 | -0.80676500 |
| N   | -1.05068000 | -1.33261400 | -0.38258900 |
| C   | 1.64203400  | -3.64028200 | -0.78267800 |
| H   | 2.26184100  | -3.72357900 | 0.12140500  |
| H   | 1.17784900  | -4.60464500 | -0.98839400 |
| C   | -2.37333300 | -0.97686500 | -0.02035700 |
| C   | -3.34161600 | -0.71851600 | -0.99176900 |
| C   | -2.71942900 | -0.87230800 | 1.32995100  |
| C   | -4.62412700 | -0.31961600 | -0.63744300 |
| C   | -3.99582300 | -0.47378100 | 1.70708900  |
| C   | -4.92666600 | -0.19399800 | 0.71310900  |
| H   | -5.36650700 | -0.11355100 | -1.39846000 |
| H   | -4.25273300 | -0.37944600 | 2.75486300  |
| Cl  | -2.94979200 | -0.89671400 | -2.67061500 |
| Cl  | -6.52004300 | 0.31991400  | 1.17202500  |
| Cl  | -1.55720500 | -1.25230500 | 2.54687900  |
| O   | 2.41005100  | -3.27667300 | -1.91532700 |
| MI' |             |             |             |
| C   | -0.16715700 | 1.14393000  | -0.18957500 |
| O   | -0.33174500 | 1.13434300  | 1.06667500  |
| O   | 1.23431800  | 1.60850800  | -0.62636200 |
| C   | 1.58385400  | 2.85298200  | -0.28349500 |
| O   | 0.81451400  | 3.71436700  | 0.07391200  |
| C   | 3.08146300  | 3.05270800  | -0.41184500 |
| C   | 3.52170900  | 4.47322900  | -0.08580700 |
| H   | 3.37481400  | 2.77342000  | -1.43228900 |
| H   | 3.56372000  | 2.32264600  | 0.25230000  |
| C   | 5.02968600  | 4.65235800  | -0.23066600 |
| H   | 2.99014100  | 5.16975000  | -0.74212400 |
| H   | 3.20486600  | 4.71711000  | 0.93285100  |
| H   | 5.33282000  | 5.67465300  | 0.00865200  |
| H   | 5.57180600  | 3.97646200  | 0.43843500  |
| H   | 5.35528100  | 4.43736700  | -1.25378500 |
| C   | -1.19388300 | 1.88849100  | -1.08933900 |
| C   | -2.30017500 | 2.53984000  | -0.26793300 |
| H   | -1.62489000 | 1.19538600  | -1.82141000 |
| H   | -0.67190400 | 2.65290000  | -1.67069700 |
| C   | -3.40424000 | 3.10361100  | -1.15682400 |
| H   | -2.71318900 | 1.80638300  | 0.43301300  |
| H   | -1.85001100 | 3.32361700  | 0.34735000  |

|     |             |             |             |
|-----|-------------|-------------|-------------|
| H   | -4.20340800 | 3.55775900  | -0.56424300 |
| H   | -3.01561400 | 3.86790700  | -1.83770100 |
| H   | -3.85214100 | 2.31349500  | -1.77257100 |
| C   | 3.12314400  | -0.91000700 | 0.41518700  |
| C   | 4.26744600  | -1.70264900 | 0.39881600  |
| C   | 5.01260000  | -1.86760100 | 1.56324600  |
| C   | 4.58327100  | -1.23709500 | 2.72884800  |
| C   | 3.42209200  | -0.45935400 | 2.73722900  |
| C   | 2.67147800  | -0.28551100 | 1.57634000  |
| C   | 2.48186000  | -0.86453300 | -0.95238300 |
| C   | 3.24283500  | -1.95229800 | -1.79318500 |
| C   | 4.51252900  | -2.28478800 | -0.97092500 |
| H   | 5.90691400  | -2.48369200 | 1.56583800  |
| H   | 5.15144700  | -1.36033400 | 3.64556800  |
| H   | 3.09720400  | 0.01128200  | 3.65939500  |
| H   | 1.74960000  | 0.29813100  | 1.57960400  |
| H   | 3.49582400  | -1.54784600 | -2.77381800 |
| H   | 4.67213600  | -3.36783100 | -0.95898700 |
| H   | 2.56819000  | 0.11631900  | -1.41334200 |
| H   | 5.39498800  | -1.83650200 | -1.43901500 |
| C   | 0.63365000  | -2.48306500 | -0.78165500 |
| C   | -0.02312900 | -0.38956700 | -0.63174800 |
| N   | -0.63964500 | -2.56944800 | -0.56117900 |
| N   | 1.04787000  | -1.17334100 | -0.85321600 |
| N   | -1.03117100 | -1.26080100 | -0.47015900 |
| C   | 1.65177900  | -3.54776600 | -1.02230600 |
| H   | 2.23507100  | -3.73175600 | -0.10848900 |
| H   | 1.16500900  | -4.47364600 | -1.32871800 |
| C   | -2.35026300 | -0.94518300 | -0.04798700 |
| C   | -3.36247000 | -0.70017600 | -0.97549800 |
| C   | -2.64281000 | -0.89538900 | 1.31867300  |
| C   | -4.63217100 | -0.31929500 | -0.56111100 |
| C   | -3.90675000 | -0.51709700 | 1.75254800  |
| C   | -4.87638200 | -0.21486500 | 0.80304700  |
| H   | -5.40948200 | -0.11519200 | -1.28692700 |
| H   | -4.12693600 | -0.46126800 | 2.81121600  |
| Cl  | -3.04904200 | -0.88872500 | -2.66882200 |
| Cl  | -6.45043500 | 0.28234600  | 1.33715000  |
| Cl  | -1.45448600 | -1.36040800 | 2.47650200  |
| O   | 2.46491000  | -3.10240200 | -2.08800900 |
| TS2 |             |             |             |
| C   | 3.52916100  | -0.76744700 | 0.55704800  |
| C   | 4.79946900  | -1.17347700 | 0.15910300  |

|    |             |             |             |
|----|-------------|-------------|-------------|
| C  | 5.23133700  | -2.46534000 | 0.44585200  |
| C  | 4.36635900  | -3.32527800 | 1.11975700  |
| C  | 3.08892100  | -2.90697200 | 1.50260100  |
| C  | 2.64983800  | -1.61448100 | 1.22565000  |
| C  | 3.25452900  | 0.65042300  | 0.10637100  |
| C  | 4.43829700  | 0.99445000  | -0.86696100 |
| C  | 5.52426300  | -0.06419400 | -0.56152800 |
| H  | 6.21807800  | -2.80093200 | 0.14100800  |
| H  | 4.68676900  | -4.33801800 | 1.34371900  |
| H  | 2.42824500  | -3.59579900 | 2.01844800  |
| H  | 1.65593400  | -1.27075200 | 1.51063000  |
| H  | 4.79636000  | 2.00797100  | -0.68339000 |
| H  | 6.00699700  | -0.38173600 | -1.49098100 |
| H  | 3.19806500  | 1.35252500  | 0.93855100  |
| H  | 6.30182300  | 0.37134300  | 0.07497200  |
| C  | 1.88955900  | 0.21902900  | -1.89349200 |
| C  | 0.71876200  | 0.86358600  | -0.14819700 |
| N  | 0.65815600  | 0.11154900  | -2.27283900 |
| N  | 1.96920900  | 0.68671700  | -0.60969700 |
| N  | -0.07109300 | 0.50955900  | -1.18097900 |
| C  | 3.17092700  | -0.02271100 | -2.62138400 |
| H  | 3.56275400  | -1.02098000 | -2.38123900 |
| H  | 3.01452400  | 0.05318200  | -3.69733400 |
| C  | -1.46164200 | 0.18405100  | -1.23016200 |
| C  | -1.83669800 | -1.16542500 | -1.20561100 |
| C  | -2.44448500 | 1.16029800  | -1.36881900 |
| C  | -3.18078400 | -1.51934000 | -1.21708400 |
| C  | -3.79103000 | 0.82488600  | -1.37947000 |
| C  | -4.13864500 | -0.51571400 | -1.28076500 |
| H  | -3.46835200 | -2.56275100 | -1.17353100 |
| H  | -4.54642000 | 1.59507100  | -1.46822000 |
| Cl | -0.66056600 | -2.42995400 | -1.18718900 |
| Cl | -5.81857600 | -0.95166300 | -1.25617300 |
| Cl | -2.00224600 | 2.81795600  | -1.58951700 |
| O  | 4.05855600  | 1.00720200  | -2.23553200 |
| C  | 0.58632000  | 1.56448100  | 1.22831700  |
| O  | 1.21215200  | 1.06465800  | 2.13890000  |
| O  | -1.54745200 | 1.03820700  | 1.46511300  |
| C  | -1.55527600 | -0.21901800 | 1.67201100  |
| O  | -0.61602400 | -0.99435900 | 1.41427400  |
| C  | -2.84288200 | -0.79959600 | 2.26414700  |
| C  | -2.84557600 | -2.31857600 | 2.36822500  |
| H  | -3.67210800 | -0.45980600 | 1.62781800  |
| H  | -3.01185800 | -0.32690400 | 3.23935200  |



|    |             |             |             |
|----|-------------|-------------|-------------|
| C  | -4.21812400 | -2.87089900 | 2.74137500  |
| H  | -2.51407900 | -2.73436400 | 1.40893800  |
| H  | -2.09329300 | -2.63191200 | 3.09961300  |
| H  | -4.21836600 | -3.96398100 | 2.77760300  |
| H  | -4.54043900 | -2.50416900 | 3.72153500  |
| H  | -4.97299700 | -2.55863400 | 2.01064500  |
| C  | 0.26899800  | 3.04070100  | 1.15468600  |
| C  | 0.07664000  | 3.64012600  | 2.54240300  |
| H  | -0.60759400 | 3.20507900  | 0.53065800  |
| H  | 1.12466900  | 3.51196400  | 0.64219200  |
| C  | 0.04768800  | 5.16474300  | 2.50719400  |
| H  | -0.86516700 | 3.24570300  | 2.92993400  |
| H  | 0.87123400  | 3.28177000  | 3.20233000  |
| H  | -0.10753500 | 5.57938600  | 3.50623200  |
| H  | 0.98880600  | 5.56868100  | 2.11972600  |
| H  | -0.75976700 | 5.53003600  | 1.86471400  |
| M2 |             |             |             |
| C  | -3.64091900 | -0.18911800 | 0.27016100  |
| C  | -4.92477700 | -0.62366100 | -0.04992500 |
| C  | -5.85599300 | 0.27894700  | -0.55408000 |
| C  | -5.47220600 | 1.60674800  | -0.73280000 |
| C  | -4.17890800 | 2.02731200  | -0.41421600 |
| C  | -3.24004700 | 1.13114400  | 0.09536500  |
| C  | -2.81997400 | -1.33351700 | 0.82273100  |
| C  | -3.65494700 | -2.61753000 | 0.47696100  |
| C  | -5.08913600 | -2.09496700 | 0.23902200  |
| H  | -6.85983500 | -0.04589600 | -0.81109800 |
| H  | -6.18588000 | 2.32133400  | -1.13065700 |
| H  | -3.89735800 | 3.06513700  | -0.56616100 |
| H  | -2.22202300 | 1.44584800  | 0.32977800  |
| H  | -3.61089700 | -3.32975300 | 1.30191400  |
| H  | -5.55746400 | -2.65504700 | -0.57575200 |
| H  | -2.66327500 | -1.24294400 | 1.89480800  |
| H  | -5.69931200 | -2.25085700 | 1.13541800  |
| C  | -1.37919300 | -1.91367400 | -1.07429900 |
| C  | -0.27339600 | -0.95697900 | 0.55285100  |
| N  | -0.15691800 | -1.85730900 | -1.50458900 |
| N  | -1.49084600 | -1.39579100 | 0.18892700  |
| N  | 0.51950000  | -1.25697200 | -0.48408700 |
| C  | -2.58972400 | -2.55526700 | -1.66623200 |
| H  | -3.28818800 | -1.79600300 | -2.04160400 |
| H  | -2.30027300 | -3.21756200 | -2.48191500 |
| C  | 1.90595700  | -0.99179600 | -0.65800100 |

|     |             |             |             |
|-----|-------------|-------------|-------------|
| C   | 2.32074800  | 0.02272700  | -1.52199200 |
| C   | 2.85916300  | -1.77934300 | -0.00932000 |
| C   | 3.67366300  | 0.29773200  | -1.67729200 |
| C   | 4.21213400  | -1.51667000 | -0.14883400 |
| C   | 4.59629200  | -0.46605900 | -0.97744100 |
| H   | 3.99223500  | 1.10413600  | -2.32527400 |
| H   | 4.94775300  | -2.12075200 | 0.36690400  |
| Cl  | 1.17088100  | 0.91104500  | -2.44763900 |
| Cl  | 6.28716100  | -0.12240500 | -1.15941300 |
| Cl  | 2.34968200  | -3.11187900 | 0.97737400  |
| O   | -3.15656200 | -3.34435300 | -0.63862200 |
| C   | 0.02835100  | -0.33692600 | 1.91947200  |
| O   | -0.91659000 | -0.28088100 | 2.67486000  |
| O   | 2.01343500  | 2.21226100  | 0.36498800  |
| C   | 0.78636100  | 2.41061600  | 0.29547700  |
| O   | -0.13218800 | 1.55068100  | 0.50372400  |
| C   | 0.32799500  | 3.82464400  | -0.09294700 |
| C   | -1.16826300 | 3.98208400  | -0.32197200 |
| H   | 0.89089200  | 4.10375800  | -0.99209800 |
| H   | 0.67193600  | 4.50719300  | 0.69485100  |
| C   | -1.55158600 | 5.39615200  | -0.75050400 |
| H   | -1.48913300 | 3.25664000  | -1.08025600 |
| H   | -1.69931800 | 3.70985300  | 0.59782800  |
| H   | -2.62983500 | 5.49444800  | -0.91109900 |
| H   | -1.26027300 | 6.12773500  | 0.01029500  |
| H   | -1.04824500 | 5.67312700  | -1.68252700 |
| C   | 1.43146700  | 0.01634500  | 2.31346500  |
| C   | 1.42588600  | 1.11593800  | 3.37558900  |
| H   | 1.98327000  | 0.38012900  | 1.44505100  |
| H   | 1.90711200  | -0.89543300 | 2.70290500  |
| C   | 2.83522600  | 1.65035100  | 3.60394000  |
| H   | 0.77395200  | 1.91872000  | 3.01638400  |
| H   | 0.98709300  | 0.73826400  | 4.30427700  |
| H   | 2.84263700  | 2.43105600  | 4.36917300  |
| H   | 3.51476500  | 0.85547600  | 3.93023900  |
| H   | 3.21640400  | 2.07389900  | 2.67073100  |
| TS3 |             |             |             |
| C   | -3.74056300 | -0.14313100 | 0.27228900  |
| C   | -5.02941300 | -0.56944600 | -0.04099500 |
| C   | -5.96985700 | 0.34745400  | -0.49848900 |
| C   | -5.59002300 | 1.68128200  | -0.64171300 |
| C   | -4.29274000 | 2.09355700  | -0.33047400 |
| C   | -3.34613000 | 1.18259100  | 0.13649100  |

|    |             |             |             |
|----|-------------|-------------|-------------|
| C  | -2.90460800 | -1.30958000 | 0.75408400  |
| C  | -3.73177900 | -2.57207500 | 0.33192700  |
| C  | -5.17824100 | -2.05255200 | 0.19344300  |
| H  | -6.97723600 | 0.02967400  | -0.75056200 |
| H  | -6.31041500 | 2.40635800  | -1.00731300 |
| H  | -4.01404600 | 3.13505200  | -0.45528400 |
| H  | -2.32937400 | 1.48933200  | 0.37080700  |
| H  | -3.64565300 | -3.35589800 | 1.08572000  |
| H  | -5.68817400 | -2.58123100 | -0.61671300 |
| H  | -2.73451200 | -1.27510500 | 1.82834200  |
| H  | -5.73604600 | -2.24673700 | 1.11635600  |
| C  | -1.49089600 | -1.72659400 | -1.20032200 |
| C  | -0.35516300 | -0.95610200 | 0.50766500  |
| N  | -0.27099200 | -1.64800300 | -1.63596400 |
| N  | -1.58291400 | -1.32521200 | 0.10463600  |
| N  | 0.42275600  | -1.15876200 | -0.56686600 |
| C  | -2.71410100 | -2.30777400 | -1.82923400 |
| H  | -3.41368300 | -1.51640000 | -2.12767100 |
| H  | -2.43897000 | -2.89877200 | -2.70246700 |
| C  | 1.82695600  | -0.97662500 | -0.72019100 |
| C  | 2.32558400  | 0.12132800  | -1.42213300 |
| C  | 2.71184700  | -1.94822800 | -0.24534100 |
| C  | 3.69665600  | 0.30034400  | -1.56165800 |
| C  | 4.08219300  | -1.78880100 | -0.37778900 |
| C  | 4.55381900  | -0.65048900 | -1.02398100 |
| H  | 4.08129900  | 1.16610400  | -2.08595900 |
| H  | 4.76398300  | -2.53556500 | 0.00911600  |
| Cl | 1.24989700  | 1.23490700  | -2.17921300 |
| Cl | 6.26616800  | -0.43220700 | -1.18997100 |
| Cl | 2.09356900  | -3.37006000 | 0.52944800  |
| O  | -3.26937100 | -3.18373900 | -0.86707100 |
| C  | -0.04225500 | -0.45395400 | 1.92715500  |
| O  | -1.04225000 | -0.23518900 | 2.60262600  |
| O  | 1.86382000  | 2.01918000  | 0.94172900  |
| C  | 0.74033500  | 2.54145000  | 0.58226600  |
| O  | -0.33463800 | 1.93128000  | 0.55038300  |
| C  | 0.81005800  | 4.00559900  | 0.17281000  |
| C  | -0.50037500 | 4.54559900  | -0.38419300 |
| H  | 1.62285300  | 4.10427200  | -0.55720400 |
| H  | 1.12784200  | 4.57988900  | 1.05213700  |
| C  | -0.39658000 | 6.01328300  | -0.78848300 |
| H  | -0.80093100 | 3.93472300  | -1.24343900 |
| H  | -1.28468500 | 4.41082400  | 0.36818800  |
| H  | -1.34358500 | 6.38949100  | -1.18482800 |

|    |             |             |             |
|----|-------------|-------------|-------------|
| H  | -0.12130500 | 6.63646400  | 0.06844800  |
| H  | 0.36897800  | 6.15571400  | -1.55813000 |
| C  | 1.31824900  | -0.18546900 | 2.26304900  |
| C  | 1.54813000  | 0.27331100  | 3.69131900  |
| H  | 1.58373700  | 0.90724200  | 1.50656100  |
| H  | 2.04059600  | -0.91428600 | 1.89788400  |
| C  | 2.99032900  | 0.73045200  | 3.89713900  |
| H  | 0.86169100  | 1.10224300  | 3.89747100  |
| H  | 1.29264700  | -0.51739000 | 4.40992200  |
| H  | 3.15909900  | 1.07707000  | 4.92034000  |
| H  | 3.69217000  | -0.08744800 | 3.70090500  |
| H  | 3.22890600  | 1.54851500  | 3.21104800  |
| M3 |             |             |             |
| C  | 3.53004900  | -0.63013600 | 0.02417700  |
| C  | 4.79277400  | -0.16677100 | -0.33295100 |
| C  | 5.57753900  | -0.89972900 | -1.21980800 |
| C  | 5.07405700  | -2.09315700 | -1.73223700 |
| C  | 3.81174800  | -2.55802900 | -1.35345200 |
| C  | 3.02475100  | -1.83214900 | -0.46339700 |
| C  | 2.84733700  | 0.32694400  | 0.97682300  |
| C  | 3.79303100  | 1.58503600  | 1.01715100  |
| C  | 5.12252200  | 1.12186200  | 0.37649400  |
| H  | 6.56354600  | -0.54744800 | -1.50825800 |
| H  | 5.67288200  | -2.67289300 | -2.42775100 |
| H  | 3.44555900  | -3.49929600 | -1.75051800 |
| H  | 2.05789800  | -2.18340800 | -0.11186400 |
| H  | 3.93016600  | 1.91537800  | 2.04703200  |
| H  | 5.50728500  | 1.90402600  | -0.28569000 |
| H  | 2.68287200  | -0.12577400 | 1.95450600  |
| H  | 5.87892400  | 0.95548100  | 1.15046900  |
| C  | 1.39221200  | 1.65793100  | -0.51898900 |
| C  | 0.30656400  | 0.20063900  | 0.71127500  |
| N  | 0.16152100  | 1.77640300  | -0.91045400 |
| N  | 1.52476400  | 0.71216100  | 0.46209000  |
| N  | -0.50351400 | 0.85260700  | -0.14354900 |
| C  | 2.60966600  | 2.44814500  | -0.86740600 |
| H  | 3.25439000  | 1.88686400  | -1.55786300 |
| H  | 2.32797500  | 3.39544400  | -1.32698900 |
| C  | -1.86639400 | 0.57575300  | -0.42246200 |
| C  | -2.21883100 | -0.59247300 | -1.10340600 |
| C  | -2.86471600 | 1.47119800  | -0.03987700 |
| C  | -3.54818300 | -0.87835100 | -1.37970800 |
| C  | -4.20075400 | 1.20952400  | -0.31675500 |

|    |             |             |             |
|----|-------------|-------------|-------------|
| C  | -4.52134100 | 0.03158700  | -0.98082500 |
| H  | -3.81610700 | -1.78885400 | -1.90100400 |
| H  | -4.97113300 | 1.90604800  | -0.00978900 |
| Cl | -0.99069900 | -1.69880400 | -1.60734200 |
| Cl | -6.18568600 | -0.31391300 | -1.32699800 |
| Cl | -2.43919700 | 2.90220900  | 0.83201400  |
| O  | 3.25788200  | 2.72683600  | 0.35795700  |
| C  | 0.03506000  | -0.91756300 | 1.67441600  |
| O  | 1.02756900  | -1.69939200 | 1.84441500  |
| C  | -1.21412900 | -0.91118700 | 2.23006400  |
| C  | -1.66986400 | -2.00499700 | 3.14355900  |
| H  | -1.91251900 | -0.11468200 | 1.99299400  |
| C  | -2.76802200 | -2.86223500 | 2.50027200  |
| H  | -0.80424000 | -2.62924300 | 3.38426100  |
| H  | -2.04652500 | -1.59299900 | 4.08918300  |
| H  | -3.11024200 | -3.65493900 | 3.17300900  |
| H  | -3.63516700 | -2.24859500 | 2.23219900  |
| H  | -2.39411900 | -3.32528800 | 1.58227100  |

nPrCOOH

|   |             |             |             |
|---|-------------|-------------|-------------|
| O | 2.04151000  | -0.93314100 | -0.27537800 |
| C | 1.18879600  | -0.14726300 | 0.05862500  |
| O | 1.42663700  | 1.17646900  | 0.14504800  |
| C | -0.23233800 | -0.48877700 | 0.42482000  |
| C | -1.26606300 | 0.31195800  | -0.37479400 |
| H | -0.36011300 | -0.28246500 | 1.49436300  |
| H | -0.35689300 | -1.56278000 | 0.27055100  |
| C | -2.69077600 | -0.07610800 | 0.00843500  |
| H | -1.10282600 | 1.37912900  | -0.19946800 |
| H | -1.10736500 | 0.13855400  | -1.44500900 |
| H | -3.42340300 | 0.49308100  | -0.56863900 |
| H | -2.87056400 | -1.13973500 | -0.17451800 |
| H | -2.87490000 | 0.11625400  | 1.06991800  |
| H | 2.35316700  | 1.31247700  | -0.10708100 |

Coordinates for the formation of M4

Z-TS4

|   |             |             |             |
|---|-------------|-------------|-------------|
| C | -2.52011200 | -2.18683500 | -0.58808600 |
| C | -3.52919400 | -3.01981300 | -0.11315900 |
| C | -3.93524700 | -4.12058700 | -0.86342000 |
| C | -3.31272600 | -4.36879000 | -2.08424900 |
| C | -2.30468100 | -3.52453000 | -2.55635400 |
| C | -1.89932000 | -2.42019000 | -1.81162900 |
| C | -2.22084000 | -1.07663300 | 0.39645100  |

|    |             |             |             |
|----|-------------|-------------|-------------|
| C  | -3.05449700 | -1.45218700 | 1.68037900  |
| C  | -4.04991500 | -2.54264000 | 1.21833500  |
| H  | -4.71948900 | -4.77826000 | -0.50031300 |
| H  | -3.61438100 | -5.22718000 | -2.67608700 |
| H  | -1.83666800 | -3.72875200 | -3.51383300 |
| H  | -1.13527700 | -1.73946700 | -2.17427100 |
| H  | -3.56986200 | -0.56648500 | 2.05364100  |
| H  | -4.11116300 | -3.33311200 | 1.97305900  |
| H  | -2.51236900 | -0.09419100 | 0.02305400  |
| H  | -5.05388200 | -2.11855200 | 1.11340000  |
| C  | -0.23421000 | -1.84597200 | 1.65284700  |
| C  | 0.20205600  | -0.23491200 | 0.20911000  |
| N  | 1.03332300  | -1.64238300 | 1.80218700  |
| N  | -0.79045300 | -1.01923400 | 0.71036500  |
| N  | 1.30917300  | -0.64210000 | 0.89005300  |
| C  | -1.17065400 | -2.70802200 | 2.43071000  |
| H  | -1.48493100 | -3.57815700 | 1.83748100  |
| H  | -0.69535100 | -3.04928500 | 3.35002800  |
| C  | 2.65800000  | -0.37224300 | 0.56437100  |
| C  | 3.23380300  | -0.93637100 | -0.57869700 |
| C  | 3.44924600  | 0.42249200  | 1.39723100  |
| C  | 4.56036800  | -0.69161800 | -0.90677500 |
| C  | 4.78251600  | 0.66948900  | 1.09661900  |
| C  | 5.31615800  | 0.11030400  | -0.05865400 |
| H  | 4.99479200  | -1.12566700 | -1.79872000 |
| H  | 5.38644100  | 1.29118100  | 1.74581500  |
| Cl | 2.28356300  | -1.96195400 | -1.59630900 |
| Cl | 6.97671200  | 0.42196900  | -0.45280400 |
| Cl | 2.74890400  | 1.13112700  | 2.80967200  |
| O  | -2.26456500 | -1.88196100 | 2.77947400  |
| C  | 0.08137100  | 0.73441900  | -0.81627400 |
| O  | -0.99788800 | 0.56624300  | -1.64555000 |
| C  | 0.92520700  | 1.82269200  | -0.89594900 |
| C  | 0.78914100  | 2.93819600  | -1.75980800 |
| H  | 1.67226900  | 1.90933400  | -0.10774300 |
| C  | 0.15892500  | 2.82883600  | -3.14447700 |
| H  | 1.65042000  | 3.60508700  | -1.71849900 |
| H  | -0.18327000 | 3.59190400  | -1.06984800 |
| H  | 0.60415800  | 2.02810600  | -3.74461900 |
| H  | -0.91657800 | 2.64213400  | -3.09597600 |
| H  | 0.30519900  | 3.77156600  | -3.67746000 |
| O  | -1.14460000 | 4.24307300  | -0.54470000 |
| C  | -2.26259000 | 3.63247200  | -0.46004800 |
| O  | -2.50001700 | 2.46998500  | -0.84632200 |

|   |             |            |             |
|---|-------------|------------|-------------|
| C | -3.38687500 | 4.44397500 | 0.16830300  |
| C | -4.66144000 | 3.65235900 | 0.42825700  |
| H | -3.58522700 | 5.28946900 | -0.50270600 |
| H | -2.99698600 | 4.88598300 | 1.09225900  |
| C | -5.75287700 | 4.51541900 | 1.05451100  |
| H | -5.00964300 | 3.21902400 | -0.51432400 |
| H | -4.42829600 | 2.80430900 | 1.08204600  |
| H | -6.66202700 | 3.93850400 | 1.24339500  |
| H | -5.41992500 | 4.93853800 | 2.00779000  |
| H | -6.01684900 | 5.35078300 | 0.39802900  |
| H | -1.59457100 | 1.35522300 | -1.47384400 |

E-TS4

|   |             |             |             |
|---|-------------|-------------|-------------|
| C | -2.81359400 | -1.93824000 | -0.61598100 |
| C | -3.95613400 | -2.53097200 | -0.08551000 |
| C | -4.54812200 | -3.61179700 | -0.73232600 |
| C | -3.97493300 | -4.08631900 | -1.90945000 |
| C | -2.83067600 | -3.48430700 | -2.43849400 |
| C | -2.23872700 | -2.39875900 | -1.79671200 |
| C | -2.34051900 | -0.79874000 | 0.26121800  |
| C | -3.21709200 | -0.91606200 | 1.56609600  |
| C | -4.39278400 | -1.84226100 | 1.18156200  |
| H | -5.43832400 | -4.08031100 | -0.32303400 |
| H | -4.42246000 | -4.93204500 | -2.42191000 |
| H | -2.40198300 | -3.86380100 | -3.36031000 |
| H | -1.36183900 | -1.90488900 | -2.20488100 |
| H | -3.56236400 | 0.07413300  | 1.86545200  |
| H | -4.60576700 | -2.53242700 | 2.00380500  |
| H | -2.48853900 | 0.17894600  | -0.20239400 |
| H | -5.29952800 | -1.25263600 | 1.00967300  |
| C | -0.48859800 | -1.71821100 | 1.61736500  |
| C | 0.16808700  | -0.28706500 | 0.07210300  |
| N | 0.78737200  | -1.63309700 | 1.80819000  |
| N | -0.91860600 | -0.92137400 | 0.58746300  |
| N | 1.19922300  | -0.74817400 | 0.83163400  |
| C | -1.54431100 | -2.39112600 | 2.42728600  |
| H | -1.97403800 | -3.24318500 | 1.88264000  |
| H | -1.13287400 | -2.73605900 | 3.37542100  |
| C | 2.58057400  | -0.58921800 | 0.58182600  |
| C | 3.19077900  | -1.26520700 | -0.47979300 |
| C | 3.36518500  | 0.21836700  | 1.40936700  |
| C | 4.54819400  | -1.12051700 | -0.73290200 |
| C | 4.72761000  | 0.36592900  | 1.18421700  |
| C | 5.29713300  | -0.30509600 | 0.10844300  |

|    |             |             |             |
|----|-------------|-------------|-------------|
| H  | 5.01176900  | -1.64123100 | -1.56152100 |
| H  | 5.32680200  | 0.99614400  | 1.82960600  |
| Cl | 2.24510000  | -2.30323600 | -1.48818900 |
| Cl | 6.99680300  | -0.12348900 | -0.19083700 |
| Cl | 2.62071400  | 1.07088200  | 2.71599000  |
| O  | -2.51211200 | -1.39606700 | 2.70290500  |
| C  | 0.18574800  | 0.59822200  | -1.03018300 |
| O  | -0.85254500 | 0.46000600  | -1.91785600 |
| C  | 1.10085800  | 1.62199700  | -1.15553300 |
| C  | 0.98353700  | 2.65274000  | -2.11491700 |
| H  | 1.85547700  | 1.72884900  | -0.37526100 |
| C  | 2.15158000  | 3.59574900  | -2.33592700 |
| H  | 0.43636700  | 2.35962000  | -3.01364100 |
| H  | 0.01131400  | 3.37836300  | -1.47975300 |
| H  | 1.81851900  | 4.52652700  | -2.80334200 |
| H  | 2.62108900  | 3.86242700  | -1.38307800 |
| H  | 2.92829400  | 3.16479100  | -2.97870200 |
| O  | -0.84719200 | 4.07577100  | -0.85234400 |
| C  | -1.98588800 | 3.52909100  | -0.66544700 |
| O  | -2.31313800 | 2.37696500  | -1.01388100 |
| C  | -3.00919000 | 4.40736800  | 0.04078900  |
| C  | -4.28733700 | 3.68068700  | 0.43768300  |
| H  | -3.23286600 | 5.24273400  | -0.63511100 |
| H  | -2.51782400 | 4.85553400  | 0.91165500  |
| C  | -5.28593900 | 4.60743100  | 1.12468900  |
| H  | -4.73256900 | 3.23238700  | -0.45566800 |
| H  | -4.03163600 | 2.84533100  | 1.09968200  |
| H  | -6.19451800 | 4.07305600  | 1.41455500  |
| H  | -4.85454500 | 5.05053300  | 2.02797500  |
| H  | -5.57794100 | 5.42834400  | 0.46197200  |
| H  | -1.43316800 | 1.26120600  | -1.77063600 |

#### Z-M4

|   |             |             |             |
|---|-------------|-------------|-------------|
| C | -3.28386700 | 0.63813700  | 0.02979500  |
| C | -4.48890700 | 0.37349600  | -0.61427400 |
| C | -5.05991800 | 1.32885200  | -1.45206900 |
| C | -4.40500700 | 2.54413900  | -1.63266800 |
| C | -3.20078800 | 2.80899500  | -0.97483700 |
| C | -2.63210600 | 1.85839600  | -0.13091600 |
| C | -2.82882800 | -0.54067300 | 0.86434200  |
| C | -3.88463300 | -1.67306800 | 0.55637500  |
| C | -5.01309300 | -0.99409600 | -0.25984400 |
| H | -5.99846400 | 1.12761600  | -1.96054800 |
| H | -4.83477600 | 3.29434500  | -2.28900900 |



|      |             |             |             |
|------|-------------|-------------|-------------|
| H    | -2.70817400 | 3.76522000  | -1.11975600 |
| H    | -1.70342700 | 2.05649500  | 0.39573600  |
| H    | -4.26455100 | -2.07838200 | 1.49477800  |
| H    | -5.25482200 | -1.60359100 | -1.13709600 |
| H    | -2.82979700 | -0.29814000 | 1.92648900  |
| H    | -5.92785800 | -0.92170100 | 0.33727200  |
| C    | -1.25742200 | -1.83157000 | -0.53669800 |
| C    | -0.24193300 | -0.53352900 | 0.96383100  |
| N    | -0.01707800 | -2.02628700 | -0.80281400 |
| N    | -1.48385900 | -0.98565200 | 0.52033100  |
| N    | 0.66784300  | -1.23733500 | 0.14840400  |
| C    | -2.45735300 | -2.46038700 | -1.16142300 |
| H    | -2.92401900 | -1.76594700 | -1.87600300 |
| H    | -2.17892500 | -3.37585300 | -1.68286400 |
| C    | 1.87692200  | -0.67127500 | -0.32046000 |
| C    | 1.89466600  | 0.47044000  | -1.13116000 |
| C    | 3.10444500  | -1.26588000 | -0.01225400 |
| C    | 3.08169400  | 1.03090500  | -1.58409500 |
| C    | 4.30882800  | -0.73697000 | -0.46038500 |
| C    | 4.27686400  | 0.41429700  | -1.23659200 |
| H    | 3.07089200  | 1.92002200  | -2.20222100 |
| H    | 5.24771700  | -1.21176300 | -0.20385900 |
| Cl   | 0.39461700  | 1.20290600  | -1.60067000 |
| Cl   | 5.77407900  | 1.09915700  | -1.79525000 |
| Cl   | 3.13539000  | -2.68919900 | 0.97340200  |
| O    | -3.34411600 | -2.79874800 | -0.11263400 |
| C    | 0.05235900  | 0.35316000  | 1.94722800  |
| O    | -1.01389000 | 1.07214400  | 2.48750500  |
| C    | 1.39632500  | 0.56232600  | 2.45572300  |
| C    | 1.86840600  | 1.60776700  | 3.15771300  |
| H    | 2.07069300  | -0.27878200 | 2.30388700  |
| C    | 1.18366800  | 2.91201600  | 3.45501500  |
| H    | -0.92828300 | 1.03039400  | 3.44959400  |
| H    | 2.88405500  | 1.51724400  | 3.53722000  |
| H    | 1.00239000  | 3.03494900  | 4.52995800  |
| H    | 1.82757500  | 3.74556000  | 3.15509200  |
| H    | 0.23409000  | 3.00851600  | 2.92964500  |
| E-M4 |             |             |             |
| C    | 3.58977800  | 0.53688100  | 0.06924600  |
| C    | 4.84590300  | -0.04179500 | 0.23318500  |
| C    | 5.69582200  | 0.40581100  | 1.24107200  |
| C    | 5.26688100  | 1.43323600  | 2.07834800  |
| C    | 4.00512500  | 2.00879700  | 1.91135000  |

|    |             |             |             |
|----|-------------|-------------|-------------|
| C  | 3.15548400  | 1.56546700  | 0.90079700  |
| C  | 2.83114400  | -0.10790300 | -1.07057000 |
| C  | 3.71562000  | -1.34204600 | -1.48325000 |
| C  | 5.08266500  | -1.12663500 | -0.78751700 |
| H  | 6.67535800  | -0.04324500 | 1.37803100  |
| H  | 5.91750100  | 1.78737800  | 2.87165100  |
| H  | 3.68446700  | 2.80477600  | 2.57557700  |
| H  | 2.16588200  | 1.99650900  | 0.77511300  |
| H  | 3.82178100  | -1.37555900 | -2.56812300 |
| H  | 5.42863500  | -2.06764800 | -0.34748200 |
| H  | 2.71798200  | 0.57803800  | -1.90969300 |
| H  | 5.83786700  | -0.81724900 | -1.51782900 |
| C  | 1.33623900  | -1.69917500 | 0.05067700  |
| C  | 0.33499600  | 0.20748100  | -0.52536200 |
| N  | 0.17141400  | -1.83199400 | 0.57175100  |
| N  | 1.49749500  | -0.54633100 | -0.68245800 |
| N  | -0.48939600 | -0.64579200 | 0.21615200  |
| C  | 2.50477100  | -2.62735100 | 0.10881600  |
| H  | 3.19302500  | -2.32352100 | 0.91214100  |
| H  | 2.17100700  | -3.64812800 | 0.29653300  |
| C  | -1.89071600 | -0.64089800 | 0.26288100  |
| C  | -2.55124400 | -0.55040900 | 1.49567000  |
| C  | -2.67971300 | -0.74510900 | -0.89159100 |
| C  | -3.93675900 | -0.54200500 | 1.58663700  |
| C  | -4.06717800 | -0.70794600 | -0.83117900 |
| C  | -4.67679500 | -0.60943400 | 0.41277600  |
| H  | -4.42400600 | -0.46792500 | 2.55090800  |
| H  | -4.65654800 | -0.77696900 | -1.73723500 |
| Cl | -1.61698200 | -0.41093000 | 2.94819400  |
| Cl | -6.41337900 | -0.57806600 | 0.50376900  |
| Cl | -1.92387700 | -0.95278100 | -2.43435900 |
| O  | 3.13518500  | -2.59490000 | -1.15534200 |
| C  | 0.07565000  | 1.46944400  | -0.95754800 |
| O  | 1.00305600  | 2.04285600  | -1.82279500 |
| C  | -1.08712100 | 2.25044300  | -0.59747500 |
| C  | -1.42575200 | 3.41148600  | -1.18205900 |
| H  | -1.68267900 | 1.89432500  | 0.24152700  |
| C  | -2.57607000 | 4.26631100  | -0.74514100 |
| H  | 1.21073100  | 2.92235600  | -1.47472600 |
| H  | -0.84955500 | 3.75529900  | -2.03958400 |
| H  | -2.24369000 | 5.26429700  | -0.43687300 |
| H  | -3.29580000 | 4.41225600  | -1.55831200 |
| H  | -3.10481300 | 3.81249400  | 0.09752700  |

TS4-Direct

|    |             |             |             |
|----|-------------|-------------|-------------|
| C  | 3.45256700  | 0.50569000  | -0.04781200 |
| C  | 4.63616200  | -0.01066000 | 0.47292400  |
| C  | 5.38513500  | 0.73667600  | 1.37854000  |
| C  | 4.92766800  | 1.99743600  | 1.75166600  |
| C  | 3.74425200  | 2.51353900  | 1.21715600  |
| C  | 2.99643500  | 1.77394000  | 0.30515000  |
| C  | 2.79106900  | -0.47136200 | -0.99217000 |
| C  | 3.74266600  | -1.72660700 | -1.00221700 |
| C  | 4.94219700  | -1.37585400 | -0.08557900 |
| H  | 6.31152500  | 0.34292600  | 1.78659400  |
| H  | 5.49988900  | 2.58919200  | 2.45922400  |
| H  | 3.40961100  | 3.50349700  | 1.50940600  |
| H  | 2.09036100  | 2.17748900  | -0.13798400 |
| H  | 4.07414000  | -1.90206000 | -2.02584100 |
| H  | 5.05979300  | -2.13746100 | 0.69331000  |
| H  | 2.64853300  | -0.04037500 | -1.98375700 |
| H  | 5.87355700  | -1.37206700 | -0.65947900 |
| C  | 1.21850600  | -1.92550700 | 0.29425500  |
| C  | 0.29130500  | -0.14625000 | -0.61884500 |
| N  | -0.01035200 | -1.99199200 | 0.68802900  |
| N  | 1.45363000  | -0.85127600 | -0.52365100 |
| N  | -0.59311300 | -0.87865800 | 0.11531400  |
| C  | 2.35600100  | -2.85472300 | 0.55542900  |
| H  | 2.96241700  | -2.48487100 | 1.39519000  |
| H  | 1.98475700  | -3.85013800 | 0.79950600  |
| C  | -1.97898200 | -0.66110900 | 0.26060200  |
| C  | -2.50102100 | -0.19460300 | 1.47063500  |
| C  | -2.85977000 | -0.93243900 | -0.79189200 |
| C  | -3.86466300 | 0.00962200  | 1.63520500  |
| C  | -4.22507600 | -0.71923200 | -0.65590100 |
| C  | -4.70724700 | -0.25208100 | 0.56133800  |
| H  | -4.25600400 | 0.37477100  | 2.57649300  |
| H  | -4.89704700 | -0.92441500 | -1.48002200 |
| Cl | -1.42681000 | 0.16781100  | 2.77786400  |
| Cl | -6.41329000 | 0.00990900  | 0.74704600  |
| Cl | -2.24474600 | -1.54038500 | -2.28687200 |
| O  | 3.10724400  | -2.94171800 | -0.63611300 |
| C  | 0.07284400  | 1.03711100  | -1.35350300 |
| O  | 1.00607200  | 1.45632900  | -2.21003600 |
| C  | -0.86851900 | 2.00653200  | -1.02051000 |
| C  | -0.60987500 | 3.22372800  | -1.72319400 |
| H  | -1.52166300 | 1.92795600  | -0.15431200 |
| C  | -1.09926800 | 4.53452300  | -1.14868100 |

|   |             |            |             |
|---|-------------|------------|-------------|
| H | 0.68579200  | 2.68212600 | -1.99292800 |
| H | -0.72620700 | 3.14525000 | -2.81015800 |
| H | -0.59076900 | 5.38141100 | -1.61834900 |
| H | -2.17701600 | 4.68495000 | -1.29374800 |
| H | -0.90130100 | 4.59349300 | -0.07402100 |

TS4-DMAP

|    |             |             |             |
|----|-------------|-------------|-------------|
| C  | -0.65006100 | 3.51857400  | -0.72172700 |
| C  | -0.96464600 | 4.81962700  | -0.34136800 |
| C  | -1.78966000 | 5.60203700  | -1.14679500 |
| C  | -2.28413600 | 5.05855200  | -2.32977400 |
| C  | -1.93987100 | 3.76017800  | -2.71773500 |
| C  | -1.10977100 | 2.97614400  | -1.91980400 |
| C  | 0.21642700  | 2.82711000  | 0.30698900  |
| C  | 0.41378600  | 3.90226900  | 1.44255600  |
| C  | -0.28191300 | 5.19757200  | 0.94767800  |
| H  | -2.04241400 | 6.61882300  | -0.85920600 |
| H  | -2.93338300 | 5.65473200  | -2.96385100 |
| H  | -2.31584300 | 3.36414900  | -3.65612800 |
| H  | -0.77720900 | 1.98222100  | -2.21104900 |
| H  | 1.48135500  | 4.06602100  | 1.59472100  |
| H  | -0.97405900 | 5.56847500  | 1.71172300  |
| H  | 1.15502800  | 2.49179800  | -0.12922900 |
| H  | 0.45575800  | 5.98966700  | 0.78442500  |
| C  | -1.30486600 | 1.68954500  | 1.89971900  |
| C  | -0.52897700 | 0.36299700  | 0.29248500  |
| N  | -1.93670200 | 0.58761700  | 2.11398100  |
| N  | -0.43865000 | 1.63014700  | 0.84311800  |
| N  | -1.47016400 | -0.26167300 | 1.10751400  |
| C  | -1.36257700 | 2.95847400  | 2.68066800  |
| H  | -2.07367000 | 3.65821100  | 2.21701000  |
| H  | -1.68055900 | 2.75871500  | 3.70412900  |
| C  | -2.33543600 | -1.31099000 | 0.74199000  |
| C  | -3.27646900 | -1.15903200 | -0.28549600 |
| C  | -2.31872800 | -2.52145200 | 1.44181500  |
| C  | -4.13711700 | -2.18890300 | -0.63949800 |
| C  | -3.17971500 | -3.56325200 | 1.11969600  |
| C  | -4.07293600 | -3.38133800 | 0.07227600  |
| H  | -4.85451500 | -2.05503900 | -1.43959000 |
| H  | -3.14678400 | -4.49474000 | 1.67087900  |
| Cl | -3.38269400 | 0.35223500  | -1.12296100 |
| Cl | -5.15211200 | -4.67830000 | -0.35378100 |
| Cl | -1.17720400 | -2.74075100 | 2.72665300  |
| O  | -0.05682200 | 3.49649100  | 2.71879200  |

|   |             |             |             |
|---|-------------|-------------|-------------|
| C | 0.21010800  | -0.09949000 | -0.81385000 |
| O | 0.95031300  | 0.73395200  | -1.50370000 |
| C | 0.12397500  | -1.47744800 | -1.12131100 |
| C | 0.82789200  | -2.04446100 | -2.18927100 |
| H | -0.38497000 | -2.14640400 | -0.42864000 |
| C | 0.58257800  | -3.47681500 | -2.61104600 |
| H | 1.09218600  | -1.33245900 | -2.97460000 |
| H | 2.17013700  | -1.98231200 | -1.56166600 |
| H | 1.45491700  | -3.91050600 | -3.11327700 |
| H | 0.35823700  | -4.10608700 | -1.74230400 |
| H | -0.26219200 | -3.57379800 | -3.30553800 |
| C | 4.21153700  | -2.72154300 | -0.87054100 |
| C | 5.46364800  | -2.43616200 | -0.37776000 |
| C | 5.81348700  | -1.08705100 | -0.11104500 |
| C | 4.82899800  | -0.10534400 | -0.38216600 |
| C | 3.60060400  | -0.47937400 | -0.88301100 |
| N | 3.30633600  | -1.76752300 | -1.11675300 |
| H | 3.90482100  | -3.74239100 | -1.07928200 |
| H | 6.15554800  | -3.24767000 | -0.19901000 |
| H | 5.02106300  | 0.94463800  | -0.20709100 |
| H | 2.78168700  | 0.21926700  | -1.11730900 |
| N | 7.03275600  | -0.75786700 | 0.38097500  |
| C | 7.34704500  | 0.63166800  | 0.66834300  |
| H | 8.34756400  | 0.68812700  | 1.09346900  |
| H | 7.32320200  | 1.24338100  | -0.24046800 |
| H | 6.64242000  | 1.05473500  | 1.39231700  |
| C | 8.02012900  | -1.79389700 | 0.63024000  |
| H | 8.93272400  | -1.33224700 | 1.00297200  |
| H | 7.66654200  | -2.51099000 | 1.37977100  |
| H | 8.26358800  | -2.34008300 | -0.28779600 |

TS4-DMAP·H+

|   |            |             |             |
|---|------------|-------------|-------------|
| C | 2.79129700 | -2.94713100 | -0.62394600 |
| C | 3.58891000 | -3.99754600 | -0.18083900 |
| C | 4.75529400 | -4.32251300 | -0.86990400 |
| C | 5.10315900 | -3.57733200 | -1.99358200 |
| C | 4.29731700 | -2.52269200 | -2.43088700 |
| C | 3.12842000 | -2.19888500 | -1.74863600 |
| C | 1.59056300 | -2.75536700 | 0.27356800  |
| C | 1.83135900 | -3.74098700 | 1.48144100  |
| C | 3.00787700 | -4.64981500 | 1.04740800  |
| H | 5.38631200 | -5.13967600 | -0.53392000 |
| H | 6.01175200 | -3.81744300 | -2.53599200 |
| H | 4.58403200 | -1.95507900 | -3.30985000 |

|    |             |             |             |
|----|-------------|-------------|-------------|
| H  | 2.48941800  | -1.38832800 | -2.08770900 |
| H  | 0.92572400  | -4.31871700 | 1.66741700  |
| H  | 3.72645500  | -4.74377700 | 1.86805600  |
| H  | 0.65492800  | -2.98156000 | -0.23272600 |
| H  | 2.64681700  | -5.65859900 | 0.82405300  |
| C  | 2.28433100  | -0.94790800 | 1.80502700  |
| C  | 0.93474600  | -0.25571000 | 0.20167900  |
| N  | 2.21789900  | 0.32664500  | 1.99221400  |
| N  | 1.51199500  | -1.36363700 | 0.74515200  |
| N  | 1.37888400  | 0.76356100  | 0.98877500  |
| C  | 2.97956600  | -1.99914500 | 2.60480100  |
| H  | 3.92109400  | -2.29331500 | 2.11958100  |
| H  | 3.19320100  | -1.62879900 | 3.60717800  |
| C  | 1.34867700  | 2.15073600  | 0.70985900  |
| C  | 2.25136300  | 2.69341800  | -0.21010800 |
| C  | 0.45290300  | 2.99704200  | 1.36465000  |
| C  | 2.25216100  | 4.05269100  | -0.49076000 |
| C  | 0.43890000  | 4.36091500  | 1.10489300  |
| C  | 1.34242900  | 4.86791300  | 0.17515400  |
| H  | 2.95221000  | 4.46603600  | -1.20633800 |
| H  | -0.25931700 | 5.01252300  | 1.61593400  |
| Cl | 3.37479000  | 1.64915000  | -1.00973100 |
| Cl | 1.33349600  | 6.56590600  | -0.16305200 |
| Cl | -0.68303200 | 2.32396100  | 2.48248900  |
| O  | 2.07813200  | -3.08138600 | 2.71096400  |
| C  | 0.09839500  | -0.18720600 | -0.93770400 |
| O  | 0.07674000  | -1.33868500 | -1.70797700 |
| C  | -0.63748700 | 0.91887100  | -1.31442600 |
| C  | -1.51839600 | 0.95968300  | -2.41463100 |
| H  | -0.63313500 | 1.78068700  | -0.65070600 |
| C  | -2.03555200 | 2.30500900  | -2.89462900 |
| H  | -1.30136900 | 0.23752100  | -3.20590500 |
| H  | -2.66907700 | 0.38960600  | -1.81495400 |
| H  | -2.97574100 | 2.19423900  | -3.44259400 |
| H  | -2.23007000 | 2.96957000  | -2.04622300 |
| H  | -1.32623700 | 2.81112100  | -3.55767300 |
| C  | -3.92194000 | 0.01456900  | 0.02917500  |
| C  | -5.02587300 | -0.48361300 | 0.67910900  |
| C  | -6.01561900 | -1.18448200 | -0.06209000 |
| C  | -5.78557200 | -1.32103100 | -1.45802600 |
| C  | -4.64846800 | -0.78574100 | -2.01363500 |
| N  | -3.72732400 | -0.13292400 | -1.28926600 |
| H  | -3.14698000 | 0.55815600  | 0.56484600  |
| H  | -5.12114100 | -0.32998300 | 1.74513400  |

|   |             |             |             |
|---|-------------|-------------|-------------|
| H | -6.49007700 | -1.83343400 | -2.09831200 |
| H | -4.44855000 | -0.86949400 | -3.07806400 |
| N | -7.11556100 | -1.69372500 | 0.52628800  |
| C | -8.10620300 | -2.40374000 | -0.27122100 |
| H | -8.89689000 | -2.76200800 | 0.38456300  |
| H | -8.55218900 | -1.74716000 | -1.02584200 |
| H | -7.65907800 | -3.26784900 | -0.77302700 |
| C | -7.32989200 | -1.51138000 | 1.95523200  |
| H | -8.27761700 | -1.96882300 | 2.23130400  |
| H | -6.53462800 | -1.98786700 | 2.53807400  |
| H | -7.37207500 | -0.44870700 | 2.21560300  |
| H | -0.84327200 | -1.55276700 | -1.91480000 |

M04-DMAP·H+

|   |             |             |             |
|---|-------------|-------------|-------------|
| C | -0.74202600 | -3.43663500 | -0.58723700 |
| C | -1.10202400 | -4.73132100 | -0.22114900 |
| C | -1.19627200 | -5.72651100 | -1.18997000 |
| C | -0.92071200 | -5.40129400 | -2.51578800 |
| C | -0.56106500 | -4.09961200 | -2.87410200 |
| C | -0.47114400 | -3.09927100 | -1.90991600 |
| C | -0.70025700 | -2.53105600 | 0.62480700  |
| C | -0.82425000 | -3.51030400 | 1.85356000  |
| C | -1.35878800 | -4.83205400 | 1.26053900  |
| H | -1.47387800 | -6.73977200 | -0.91636800 |
| H | -0.98590000 | -6.16855700 | -3.28034800 |
| H | -0.35254200 | -3.86678200 | -3.91291100 |
| H | -0.21153600 | -2.07910200 | -2.17627000 |
| H | -1.50159800 | -3.09278300 | 2.59876500  |
| H | -0.85858900 | -5.68043800 | 1.73695800  |
| H | -1.49609800 | -1.78472900 | 0.61706300  |
| H | -2.42988700 | -4.93320900 | 1.46408000  |
| C | 1.71621400  | -2.42677400 | 1.13750000  |
| C | 0.91121700  | -0.55513900 | 0.34638900  |
| N | 2.74335300  | -1.63412300 | 1.07755700  |
| N | 0.57639300  | -1.80448300 | 0.69609500  |
| N | 2.23085600  | -0.47454000 | 0.57059400  |
| C | 1.54922000  | -3.78416000 | 1.73903300  |
| H | 1.44812300  | -4.55096600 | 0.95992700  |
| H | 2.39985200  | -4.02268000 | 2.37659200  |
| C | 3.10368500  | 0.60260500  | 0.24983200  |
| C | 3.40623400  | 0.88669900  | -1.08437100 |
| C | 3.67347200  | 1.37023800  | 1.26656700  |
| C | 4.25674400  | 1.93495500  | -1.40603500 |
| C | 4.53203900  | 2.41815000  | 0.96314500  |

|    |             |             |             |
|----|-------------|-------------|-------------|
| C  | 4.80851400  | 2.68733700  | -0.37359400 |
| H  | 4.48767900  | 2.15509500  | -2.44113900 |
| H  | 4.97081500  | 3.01399300  | 1.75399900  |
| Cl | 2.70545000  | -0.06142400 | -2.34873400 |
| Cl | 5.86652700  | 3.99937600  | -0.76286700 |
| Cl | 3.27803500  | 1.03736100  | 2.91536600  |
| O  | 0.39696900  | -3.68824700 | 2.55492900  |
| C  | 0.01865600  | 0.46507400  | -0.22401000 |
| O  | -0.90663600 | -0.07538300 | -1.02936600 |
| C  | 0.20651900  | 1.76118300  | 0.07818200  |
| C  | -0.52177800 | 2.90613100  | -0.55327000 |
| H  | 0.97374900  | 2.00905700  | 0.80821400  |
| C  | 0.47274000  | 3.97368100  | -1.02143200 |
| H  | -1.11929500 | 2.54149800  | -1.39364600 |
| H  | -1.22603000 | 3.34566300  | 0.16467300  |
| H  | -0.04849700 | 4.81981000  | -1.47382400 |
| H  | 1.06597800  | 4.34998400  | -0.18241300 |
| H  | 1.16183700  | 3.55908800  | -1.76257300 |
| C  | -3.46969500 | 1.28381400  | 0.72996000  |
| C  | -4.65329700 | 1.86486700  | 1.13079500  |
| C  | -5.62649800 | 2.20348400  | 0.15750700  |
| C  | -5.29422500 | 1.90889200  | -1.18818800 |
| C  | -4.07935900 | 1.32590000  | -1.47632400 |
| N  | -3.16512200 | 1.00760700  | -0.54740100 |
| H  | -2.71203300 | 1.02439000  | 1.46660700  |
| H  | -4.81670500 | 2.05518600  | 2.18285500  |
| H  | -5.97313800 | 2.13116000  | -2.00004300 |
| H  | -3.81539000 | 1.09687500  | -2.50494600 |
| N  | -6.80425000 | 2.77771300  | 0.49374800  |
| C  | -7.76768700 | 3.11866100  | -0.54111500 |
| H  | -8.63810200 | 3.57860500  | -0.07730100 |
| H  | -7.34461400 | 3.83101400  | -1.25747300 |
| H  | -8.09818600 | 2.22759700  | -1.08591800 |
| C  | -7.10436700 | 3.05693000  | 1.88885300  |
| H  | -8.09411200 | 3.50439600  | 1.95596900  |
| H  | -7.10296000 | 2.13919800  | 2.48697900  |
| H  | -6.38080800 | 3.75802300  | 2.31916400  |
| H  | -1.84047200 | 0.39507100  | -0.89032300 |

Coordinates for the reaction between M4 and R2

TS5RR

|   |             |             |             |
|---|-------------|-------------|-------------|
| C | -1.47344300 | -3.16803700 | -0.17238100 |
| C | -2.43358800 | -3.84323200 | 0.57749800  |
| C | -3.15294700 | -4.88649000 | 0.00159900  |



|    |             |             |             |
|----|-------------|-------------|-------------|
| C  | -2.89118500 | -5.23565100 | -1.32241700 |
| C  | -1.92963800 | -4.54818700 | -2.06734600 |
| C  | -1.21124100 | -3.49984700 | -1.49686200 |
| C  | -0.85522200 | -2.05537600 | 0.63793800  |
| C  | -1.34727000 | -2.30358800 | 2.10688700  |
| C  | -2.55865500 | -3.24923300 | 1.95864900  |
| H  | -3.90580000 | -5.42113700 | 0.57353700  |
| H  | -3.44135200 | -6.05096800 | -1.78188700 |
| H  | -1.74428300 | -4.83091900 | -3.09857900 |
| H  | -0.47468100 | -2.93876200 | -2.06485700 |
| H  | -1.61935000 | -1.34728500 | 2.56105700  |
| H  | -2.55526800 | -3.99319200 | 2.76085100  |
| H  | -1.19148600 | -1.07884000 | 0.29042700  |
| H  | -3.48822600 | -2.67265300 | 2.03805000  |
| C  | 1.38102200  | -2.73198500 | 1.42778200  |
| C  | 1.37122000  | -1.07227900 | -0.02793300 |
| N  | 2.61497000  | -2.34326900 | 1.40765100  |
| N  | 0.59316100  | -2.01207600 | 0.56987900  |
| N  | 2.61516800  | -1.31508700 | 0.47876400  |
| C  | 0.64988900  | -3.64142100 | 2.35734800  |
| H  | 0.22109600  | -4.49210100 | 1.81014600  |
| H  | 1.31425000  | -4.00553000 | 3.14031000  |
| C  | 3.84253400  | -0.83851100 | -0.02982300 |
| C  | 4.63203900  | 0.03605500  | 0.72104900  |
| C  | 4.30552300  | -1.25657900 | -1.28208900 |
| C  | 5.85450400  | 0.49183700  | 0.24423800  |
| C  | 5.51707900  | -0.80304400 | -1.78567600 |
| C  | 6.27637900  | 0.06533000  | -1.00923400 |
| H  | 6.45623000  | 1.17057300  | 0.83567400  |
| H  | 5.86457400  | -1.13122100 | -2.75727400 |
| Cl | 4.06174600  | 0.58330500  | 2.25784700  |
| Cl | 7.79693200  | 0.63103400  | -1.62428500 |
| Cl | 3.36296000  | -2.36379700 | -2.21927600 |
| O  | -0.34824000 | -2.84466400 | 2.97001100  |
| C  | 0.95712700  | -0.09687600 | -0.95414800 |
| O  | -0.07069100 | -0.48819000 | -1.78112900 |
| C  | 1.55378300  | 1.15643500  | -0.98215700 |
| C  | 1.06615300  | 2.25370700  | -1.67916000 |
| H  | 2.34670400  | 1.33284400  | -0.25606400 |
| C  | 1.86655200  | 3.52283900  | -1.76089800 |
| H  | -0.61398300 | 0.28194600  | -2.05321800 |
| H  | 0.37419400  | 2.06882700  | -2.49562900 |
| H  | 2.52658300  | 3.52126100  | -2.63587400 |
| H  | 1.21860200  | 4.40327500  | -1.84832000 |

|       |             |             |             |
|-------|-------------|-------------|-------------|
| H     | 2.48346000  | 3.65657000  | -0.86652200 |
| C     | -2.07450700 | 1.14099500  | 0.94834100  |
| O     | -1.53190900 | 1.19015600  | 2.05733000  |
| C     | -1.64756200 | 1.87307900  | -0.23035000 |
| C     | -0.60528900 | 2.82796900  | -0.31772800 |
| H     | -0.76631800 | 3.56166700  | -1.10845000 |
| C     | -3.30366600 | 0.25368700  | 0.84190000  |
| C     | -3.57175900 | -0.58868100 | -0.24179900 |
| C     | -4.17468200 | 0.24900400  | 1.93605700  |
| C     | -4.70090300 | -1.40514500 | -0.24035100 |
| H     | -2.88446800 | -0.63768400 | -1.08423900 |
| C     | -5.31924500 | -0.54048600 | 1.92479400  |
| H     | -3.93766200 | 0.87956800  | 2.78695900  |
| C     | -5.58537500 | -1.36965000 | 0.83422900  |
| H     | -4.87803200 | -2.07521000 | -1.07590800 |
| H     | -6.00076000 | -0.51726100 | 2.76934300  |
| H     | -6.47288900 | -1.99457400 | 0.82939000  |
| C     | 0.17118600  | 3.40579900  | 0.80437300  |
| C     | 0.29993800  | 4.80002200  | 0.85065000  |
| C     | 0.84279300  | 2.64262100  | 1.77033100  |
| C     | 1.05641800  | 5.42261300  | 1.84025200  |
| H     | -0.20739300 | 5.40314500  | 0.10179000  |
| C     | 1.60824200  | 3.26302200  | 2.74869900  |
| H     | 0.75238100  | 1.56356600  | 1.75093300  |
| C     | 1.71557300  | 4.65374400  | 2.79257300  |
| H     | 1.13310400  | 6.50508700  | 1.86042900  |
| H     | 2.12033100  | 2.65732700  | 3.48998200  |
| H     | 2.30949500  | 5.13115700  | 3.56565500  |
| C     | -2.44713400 | 1.79329200  | -1.48192300 |
| O     | -1.91358700 | 1.44339300  | -2.53935100 |
| C     | -3.87677300 | 2.23048000  | -1.51179000 |
| C     | -4.43086500 | 2.99162500  | -0.47982700 |
| C     | -4.65370700 | 1.90061200  | -2.62654200 |
| C     | -5.75443500 | 3.41256600  | -0.56036900 |
| H     | -3.81985900 | 3.25818100  | 0.37741800  |
| C     | -5.97646100 | 2.31568000  | -2.70227000 |
| H     | -4.19991100 | 1.31498100  | -3.41939500 |
| C     | -6.52756800 | 3.07261600  | -1.66813200 |
| H     | -6.18243400 | 4.00712100  | 0.24005900  |
| H     | -6.58022000 | 2.05135400  | -3.56434200 |
| H     | -7.56119100 | 3.39916300  | -1.72713900 |
| TS5RS |             |             |             |
| C     | -0.75689800 | -3.52009800 | -0.70378600 |

|    |             |             |             |
|----|-------------|-------------|-------------|
| C  | -1.60200200 | -4.48221000 | -0.15495700 |
| C  | -2.15106700 | -5.46658900 | -0.97107100 |
| C  | -1.83738700 | -5.46795000 | -2.32961300 |
| C  | -0.99431500 | -4.49457400 | -2.87101600 |
| C  | -0.44760900 | -3.50315900 | -2.05870800 |
| C  | -0.32331200 | -2.53823300 | 0.35607100  |
| C  | -0.74196200 | -3.19900900 | 1.71166500  |
| C  | -1.81539800 | -4.23491600 | 1.31871300  |
| H  | -2.81195100 | -6.22293600 | -0.55760300 |
| H  | -2.25397500 | -6.23400300 | -2.97620000 |
| H  | -0.76704000 | -4.50972000 | -3.93203700 |
| H  | 0.19494300  | -2.72635000 | -2.46357000 |
| H  | -1.12848800 | -2.42643200 | 2.38085700  |
| H  | -1.71932700 | -5.13227900 | 1.93667800  |
| H  | -0.83706400 | -1.58865100 | 0.23453100  |
| H  | -2.81286900 | -3.81206000 | 1.48849700  |
| C  | 2.00174900  | -2.98050100 | 1.02595000  |
| C  | 1.67245900  | -1.02567600 | 0.04852800  |
| N  | 3.13988100  | -2.38337300 | 1.16563000  |
| N  | 1.08994900  | -2.21880100 | 0.34372500  |
| N  | 2.94429000  | -1.16186600 | 0.53712000  |
| C  | 1.45633100  | -4.21546900 | 1.66095000  |
| H  | 1.18151300  | -4.95498100 | 0.89674700  |
| H  | 2.18436700  | -4.64812300 | 2.34628300  |
| C  | 4.06907600  | -0.38553000 | 0.18634800  |
| C  | 4.71592000  | 0.40514200  | 1.13981100  |
| C  | 4.57788100  | -0.41511200 | -1.11679700 |
| C  | 5.83582500  | 1.15883900  | 0.81116900  |
| C  | 5.68622400  | 0.34136700  | -1.47289700 |
| C  | 6.30077500  | 1.11851700  | -0.49757100 |
| H  | 6.32627500  | 1.76856600  | 1.55976100  |
| H  | 6.06740400  | 0.31321600  | -2.48612100 |
| Cl | 4.09308000  | 0.46890000  | 2.75162200  |
| Cl | 7.69134700  | 2.06311800  | -0.92725400 |
| Cl | 3.82636100  | -1.42064800 | -2.30812700 |
| O  | 0.33864000  | -3.79954800 | 2.42562700  |
| C  | 1.08723000  | 0.05997900  | -0.62016800 |
| O  | 0.12484400  | -0.28026500 | -1.54876200 |
| C  | 1.50501300  | 1.36160800  | -0.35935300 |
| C  | 0.91988900  | 2.52164200  | -0.83910900 |
| H  | 2.28107500  | 1.47247000  | 0.39713900  |
| C  | 1.64013300  | 3.83489700  | -0.68087400 |
| H  | -0.52586600 | 0.44158300  | -1.65824400 |
| H  | 0.22830600  | 2.44329200  | -1.67591000 |

|   |             |             |             |
|---|-------------|-------------|-------------|
| H | 2.46009200  | 3.91682400  | -1.40517500 |
| H | 0.97571800  | 4.68664700  | -0.84199900 |
| H | 2.07307100  | 3.93000600  | 0.32141800  |
| C | -1.88365300 | 0.36697700  | 1.27892400  |
| O | -1.18397500 | 0.23152500  | 2.28932600  |
| C | -1.76019000 | 1.47525900  | 0.34714200  |
| C | -0.85498500 | 2.50512400  | 0.63975300  |
| H | -0.27189300 | 2.29197900  | 1.53495500  |
| C | -2.98582300 | -0.64476600 | 1.04380200  |
| C | -3.24413400 | -1.22490300 | -0.20301400 |
| C | -3.75445800 | -1.02973300 | 2.14662900  |
| C | -4.26781400 | -2.15816400 | -0.34794200 |
| H | -2.62522400 | -0.97442200 | -1.06210900 |
| C | -4.79924500 | -1.93558300 | 1.99520700  |
| H | -3.52437600 | -0.59729800 | 3.11550500  |
| C | -5.05967100 | -2.49995500 | 0.74589900  |
| H | -4.43914900 | -2.61913900 | -1.31555600 |
| H | -5.40667500 | -2.20878200 | 2.85232500  |
| H | -5.86803900 | -3.21488600 | 0.62949100  |
| C | -1.10811500 | 3.94669400  | 0.43108800  |
| C | -0.65546100 | 4.82464900  | 1.42613700  |
| C | -1.76683300 | 4.49068600  | -0.68306800 |
| C | -0.86168300 | 6.19647400  | 1.32667100  |
| H | -0.13718100 | 4.41691600  | 2.28990800  |
| C | -1.96957700 | 5.86227200  | -0.78213800 |
| H | -2.09321700 | 3.85185900  | -1.49572200 |
| C | -1.52171400 | 6.72207300  | 0.22018300  |
| H | -0.50400600 | 6.85366600  | 2.11299400  |
| H | -2.47539700 | 6.26399800  | -1.65451800 |
| H | -1.68184800 | 7.79190900  | 0.13403700  |
| C | -2.60027300 | 1.54787500  | -0.87530100 |
| O | -2.06228500 | 1.45957200  | -1.98334700 |
| C | -4.07126300 | 1.76910100  | -0.78720200 |
| C | -4.66591400 | 2.18170500  | 0.40748800  |
| C | -4.85416700 | 1.58642100  | -1.93124800 |
| C | -6.03825300 | 2.40338100  | 0.45860400  |
| H | -4.04593500 | 2.33654900  | 1.28595000  |
| C | -6.22435500 | 1.80203900  | -1.87626000 |
| H | -4.36788200 | 1.26930700  | -2.84824300 |
| C | -6.81651200 | 2.21028100  | -0.68028400 |
| H | -6.49987400 | 2.72876400  | 1.38502900  |
| H | -6.83437000 | 1.65209000  | -2.76124800 |
| H | -7.88793100 | 2.37988800  | -0.63815900 |

## TS5SR'

|   |             |             |             |
|---|-------------|-------------|-------------|
| C | -0.86695400 | 0.15731000  | -0.84367800 |
| O | 0.07334500  | 0.03464700  | -1.84293500 |
| C | -1.21449300 | 1.37118300  | -0.24346500 |
| C | -0.67083700 | 2.61393200  | -0.51176700 |
| H | -1.93595100 | 1.31153900  | 0.56899000  |
| C | -1.39017800 | 3.84393000  | -0.01486400 |
| H | 0.73781100  | 0.75011300  | -1.78739700 |
| H | -0.07491200 | 2.72365800  | -1.41657700 |
| H | -1.63870400 | 3.75108700  | 1.04895500  |
| H | -2.32984900 | 3.99402700  | -0.56062900 |
| H | -0.78873300 | 4.74613600  | -0.14016300 |
| C | 1.94879800  | 0.22481200  | 1.17880600  |
| O | 1.27385700  | 0.15330400  | 2.21314900  |
| C | 2.00941100  | 1.43100100  | 0.36674300  |
| C | 1.19964200  | 2.50615900  | 0.74603700  |
| H | 0.65991200  | 2.29925800  | 1.66863900  |
| C | 2.75303900  | -0.98447400 | 0.77289100  |
| C | 2.94260400  | -1.37016500 | -0.55715300 |
| C | 3.26145700  | -1.79453800 | 1.79268800  |
| C | 3.62579700  | -2.54670300 | -0.85994700 |
| H | 2.51719500  | -0.78327900 | -1.36528900 |
| C | 3.95569900  | -2.95947700 | 1.49244600  |
| H | 3.07681400  | -1.50244700 | 2.82159100  |
| C | 4.13589600  | -3.34077200 | 0.16295000  |
| H | 3.75529600  | -2.84154600 | -1.89733500 |
| H | 4.34270200  | -3.58152000 | 2.29335300  |
| H | 4.66961000  | -4.25647800 | -0.07331700 |
| C | 1.53355800  | 3.94072400  | 0.57281900  |
| C | 1.32603100  | 4.77466800  | 1.68071800  |
| C | 2.02653300  | 4.51803300  | -0.60760400 |
| C | 1.61654800  | 6.13370000  | 1.62616800  |
| H | 0.93202200  | 4.34381300  | 2.59719100  |
| C | 2.31225700  | 5.87794500  | -0.66121700 |
| H | 2.15910100  | 3.91378700  | -1.49707500 |
| C | 2.11271400  | 6.69223100  | 0.45199800  |
| H | 1.44881900  | 6.75560500  | 2.49994900  |
| H | 2.68680200  | 6.30596100  | -1.58583600 |
| H | 2.33456700  | 7.75329300  | 0.40075700  |
| C | 2.85924000  | 1.53131900  | -0.83929000 |
| O | 2.33362500  | 1.69127600  | -1.94738300 |
| C | 4.34383700  | 1.48444700  | -0.72943700 |
| C | 4.97808900  | 1.58844300  | 0.51096900  |
| C | 5.10664900  | 1.36108300  | -1.89516500 |

|    |             |             |             |
|----|-------------|-------------|-------------|
| C  | 6.36678700  | 1.56050000  | 0.58503400  |
| H  | 4.37851400  | 1.70236400  | 1.40900600  |
| C  | 6.49233800  | 1.33058400  | -1.81875700 |
| H  | 4.59097700  | 1.28674300  | -2.84713700 |
| C  | 7.12258000  | 1.42895800  | -0.57741600 |
| H  | 6.85912700  | 1.64541400  | 1.54811900  |
| H  | 7.08470900  | 1.23004900  | -2.72250000 |
| H  | 8.20629100  | 1.40553100  | -0.51809500 |
| C  | 0.35559600  | -3.42337800 | 0.40901200  |
| C  | 0.81585400  | -4.73740900 | 0.34163700  |
| C  | 1.13822100  | -5.42347000 | 1.50744400  |
| C  | 0.97785300  | -4.77663300 | 2.73289700  |
| C  | 0.50785900  | -3.46411700 | 2.79227700  |
| C  | 0.19087800  | -2.77113900 | 1.62501000  |
| C  | 0.00029100  | -2.91279000 | -0.97449800 |
| C  | -0.04072200 | -4.20646900 | -1.84653300 |
| C  | 0.85618100  | -5.20923300 | -1.09116900 |
| H  | 1.49208000  | -6.44962600 | 1.46661600  |
| H  | 1.21607400  | -5.30343900 | 3.65183000  |
| H  | 0.39519200  | -2.97109000 | 3.75232500  |
| H  | -0.14577200 | -1.73814800 | 1.67493300  |
| H  | 0.31676200  | -4.01077800 | -2.85854700 |
| H  | 0.49451100  | -6.23107900 | -1.23657700 |
| H  | 0.71763600  | -2.19041000 | -1.36479300 |
| H  | 1.88005700  | -5.15640000 | -1.48153000 |
| C  | -2.40206800 | -3.07363800 | -0.67683600 |
| C  | -1.63929700 | -0.99455600 | -0.63706900 |
| N  | -3.40299200 | -2.40420900 | -0.21931400 |
| N  | -1.31586700 | -2.28214200 | -0.96737700 |
| N  | -2.93280800 | -1.09662900 | -0.17932200 |
| C  | -2.24628700 | -4.54110000 | -0.93431600 |
| H  | -1.87738900 | -5.04687500 | -0.03185000 |
| H  | -3.20522000 | -4.97706500 | -1.21744800 |
| C  | -3.88118700 | -0.05843800 | -0.06249200 |
| C  | -4.34544400 | 0.62007000  | -1.19467200 |
| C  | -4.38131600 | 0.30659400  | 1.18986700  |
| C  | -5.25545300 | 1.66266200  | -1.08348600 |
| C  | -5.30386600 | 1.33647600  | 1.32542800  |
| C  | -5.72035000 | 2.00587100  | 0.18116700  |
| H  | -5.60118700 | 2.18603500  | -1.96644100 |
| H  | -5.67862800 | 1.61430600  | 2.30271800  |
| Cl | -3.78007300 | 0.15296700  | -2.76035200 |
| Cl | -6.86113300 | 3.30603800  | 0.33380200  |
| Cl | -3.81226200 | -0.51541800 | 2.60202900  |

|       |             |             |             |
|-------|-------------|-------------|-------------|
| O     | -1.36686700 | -4.69465900 | -2.03064800 |
| TS5SS |             |             |             |
| C     | 0.62265800  | 0.22728200  | -1.47198500 |
| O     | -0.50395500 | 0.27953300  | -2.26319100 |
| C     | 1.42627800  | -0.90774800 | -1.39411500 |
| C     | 1.13788200  | -2.14423800 | -1.95547500 |
| H     | 2.29455000  | -0.86866700 | -0.74632700 |
| C     | 2.22441100  | -3.18027000 | -2.06767200 |
| H     | -0.88873100 | -0.61599600 | -2.36302000 |
| H     | 0.36327500  | -2.19057300 | -2.71512000 |
| H     | 2.94539700  | -3.08847900 | -1.24836000 |
| H     | 2.76571200  | -3.07456400 | -3.01443800 |
| H     | 1.81794100  | -4.19783300 | -2.03724300 |
| C     | -1.71736900 | -1.43785300 | 0.91831500  |
| O     | -1.06897100 | -1.39703100 | 1.96854100  |
| C     | -1.36119500 | -2.21653700 | -0.25531100 |
| C     | -0.17143900 | -2.96167900 | -0.44222700 |
| H     | -0.28713300 | -3.76343200 | -1.17279100 |
| C     | -2.96251200 | -0.58322200 | 0.86445100  |
| C     | -3.32958100 | 0.15153600  | -0.26473400 |
| C     | -3.69369000 | -0.43227800 | 2.04407200  |
| C     | -4.40274500 | 1.03738000  | -0.20755800 |
| H     | -2.75001500 | 0.07183800  | -1.18031500 |
| C     | -4.77831300 | 0.43371200  | 2.09590000  |
| H     | -3.37970200 | -0.98949000 | 2.92112000  |
| C     | -5.12701400 | 1.18225100  | 0.97189200  |
| H     | -4.66563600 | 1.62346500  | -1.08395800 |
| H     | -5.34270100 | 0.54230800  | 3.01702600  |
| H     | -5.96052900 | 1.87632100  | 1.01724600  |
| C     | 0.83002000  | -3.31716600 | 0.59737500  |
| C     | 1.21842400  | -4.65781000 | 0.69360300  |
| C     | 1.47236900  | -2.38003600 | 1.41903700  |
| C     | 2.20622300  | -5.06164000 | 1.58998900  |
| H     | 0.73780700  | -5.39585100 | 0.05623100  |
| C     | 2.46557400  | -2.77853500 | 2.30251100  |
| H     | 1.17748400  | -1.33952400 | 1.36625300  |
| C     | 2.83721900  | -4.12116600 | 2.39520600  |
| H     | 2.48466900  | -6.10902000 | 1.64935400  |
| H     | 2.94146800  | -2.03620400 | 2.93755400  |
| H     | 3.61118700  | -4.42819800 | 3.09166000  |
| C     | -2.31978400 | -2.34424100 | -1.37218700 |
| O     | -1.96657000 | -2.11470800 | -2.53687400 |
| C     | -3.71222900 | -2.84061300 | -1.13633400 |

|    |             |             |             |
|----|-------------|-------------|-------------|
| C  | -4.06502200 | -3.50105900 | 0.04312000  |
| C  | -4.65954900 | -2.68437700 | -2.15247900 |
| C  | -5.35686600 | -3.99022100 | 0.20805300  |
| H  | -3.32169600 | -3.63909200 | 0.82246100  |
| C  | -5.95055500 | -3.16806000 | -1.98462500 |
| H  | -4.36122100 | -2.17826100 | -3.06482200 |
| C  | -6.30009400 | -3.82166300 | -0.80298000 |
| H  | -5.62644600 | -4.50705900 | 1.12324200  |
| H  | -6.68652500 | -3.03836200 | -2.77155600 |
| H  | -7.30798600 | -4.20314700 | -0.67221200 |
| C  | -1.69092300 | 2.93878300  | 0.51113400  |
| C  | -2.52638700 | 4.04296500  | 0.66144100  |
| C  | -3.09533700 | 4.32295700  | 1.89929800  |
| C  | -2.80937200 | 3.48229400  | 2.97417100  |
| C  | -1.97067300 | 2.37780100  | 2.81454000  |
| C  | -1.39879700 | 2.09548700  | 1.57621800  |
| C  | -1.17541400 | 2.84929000  | -0.91146500 |
| C  | -1.50280500 | 4.25613000  | -1.51126900 |
| C  | -2.66788400 | 4.78151500  | -0.64716100 |
| H  | -3.74470200 | 5.18406800  | 2.02863900  |
| H  | -3.24542600 | 3.68708400  | 3.94701200  |
| H  | -1.77057400 | 1.71900700  | 3.65348300  |
| H  | -0.76052700 | 1.22155400  | 1.45454500  |
| H  | -1.76772300 | 4.18086700  | -2.56681400 |
| H  | -2.60916200 | 5.86973400  | -0.55472700 |
| H  | -1.64939200 | 2.05065300  | -1.48347900 |
| H  | -3.62551300 | 4.54113500  | -1.12464900 |
| C  | 1.06757300  | 3.62932900  | -0.42784200 |
| C  | 1.00484600  | 1.46890900  | -0.92802500 |
| N  | 2.24647500  | 3.21776600  | -0.11194300 |
| N  | 0.27121300  | 2.62746200  | -0.92967500 |
| N  | 2.21486700  | 1.86967100  | -0.41383700 |
| C  | 0.47804800  | 5.00361700  | -0.37569600 |
| H  | -0.04719900 | 5.16198100  | 0.57525500  |
| H  | 1.26631000  | 5.75017800  | -0.47623100 |
| C  | 3.37874100  | 1.10949600  | -0.17870600 |
| C  | 4.27563600  | 0.82838400  | -1.21355300 |
| C  | 3.65275400  | 0.62400800  | 1.10302700  |
| C  | 5.40408200  | 0.05136200  | -0.99162500 |
| C  | 4.78057600  | -0.14772700 | 1.35164000  |
| C  | 5.63698300  | -0.42754600 | 0.29319500  |
| H  | 6.08655400  | -0.17162300 | -1.80216900 |
| H  | 4.98335500  | -0.52351100 | 2.34698800  |
| Cl | 3.95135700  | 1.42904800  | -2.80124100 |



|    |             |             |             |
|----|-------------|-------------|-------------|
| Cl | 7.04336300  | -1.40156100 | 0.58494800  |
| Cl | 2.55382500  | 0.96797800  | 2.39385100  |
| O  | -0.38285400 | 5.13453900  | -1.48986700 |

TS5RR'

|   |             |             |             |
|---|-------------|-------------|-------------|
| C | -0.84660400 | 0.18837700  | -0.85153300 |
| O | 0.07934800  | 0.10265400  | -1.86644600 |
| C | -1.17207800 | 1.34954100  | -0.14678800 |
| C | -0.71921000 | 2.64388200  | -0.37827100 |
| H | -1.75062000 | 1.17953200  | 0.75995300  |
| C | -0.37977700 | 3.16774000  | -1.75296100 |
| H | 0.76834400  | 0.79297600  | -1.76028000 |
| H | -1.12658500 | 3.38743000  | 0.30055600  |
| H | 0.57338200  | 3.70554500  | -1.78183700 |
| H | -1.16004900 | 3.87128500  | -2.06303600 |
| H | -0.34038400 | 2.37400300  | -2.49924600 |
| C | 1.89866200  | 0.29007100  | 1.26598500  |
| O | 1.16792600  | 0.21184300  | 2.26328500  |
| C | 2.00481700  | 1.49810300  | 0.46573400  |
| C | 1.16128600  | 2.56585300  | 0.81506600  |
| H | 0.60507400  | 2.34287700  | 1.72268500  |
| C | 2.70005100  | -0.93024600 | 0.88560800  |
| C | 2.90497700  | -1.33305100 | -0.43702200 |
| C | 3.18301600  | -1.73595300 | 1.92066400  |
| C | 3.57865200  | -2.52008900 | -0.71741800 |
| H | 2.50225200  | -0.74862900 | -1.25882800 |
| C | 3.86772300  | -2.91236500 | 1.64314300  |
| H | 2.98580600  | -1.43232300 | 2.94400500  |
| C | 4.06367000  | -3.30988900 | 0.32094900  |
| H | 3.72097200  | -2.82674700 | -1.74990100 |
| H | 4.23468100  | -3.53048300 | 2.45650800  |
| H | 4.58874800  | -4.23495600 | 0.10246200  |
| C | 1.45824900  | 4.00999000  | 0.66540400  |
| C | 0.76833500  | 4.89767500  | 1.50714600  |
| C | 2.40132700  | 4.55025900  | -0.22163000 |
| C | 1.00218700  | 6.26535000  | 1.46926200  |
| H | 0.04180000  | 4.49462100  | 2.20870300  |
| C | 2.63596100  | 5.92224800  | -0.26050800 |
| H | 2.95988800  | 3.91224200  | -0.89495700 |
| C | 1.94066800  | 6.78602300  | 0.57945900  |
| H | 0.45636700  | 6.92460600  | 2.13683300  |
| H | 3.37077900  | 6.31522700  | -0.95594300 |
| H | 2.12866700  | 7.85421100  | 0.54411000  |
| C | 2.85408800  | 1.55831300  | -0.73717500 |

|   |             |             |             |
|---|-------------|-------------|-------------|
| O | 2.34002200  | 1.74172200  | -1.84829400 |
| C | 4.33837000  | 1.44065100  | -0.62922100 |
| C | 4.98268000  | 1.53668900  | 0.60657000  |
| C | 5.09015900  | 1.26257300  | -1.79473200 |
| C | 6.36870600  | 1.44114600  | 0.67679700  |
| H | 4.39256800  | 1.69570100  | 1.50420700  |
| C | 6.47338400  | 1.16552500  | -1.72242600 |
| H | 4.56770900  | 1.19753100  | -2.74384700 |
| C | 7.11305600  | 1.25294700  | -0.48531800 |
| H | 6.86827800  | 1.51830500  | 1.63689900  |
| H | 7.05590500  | 1.02021000  | -2.62657500 |
| H | 8.19457100  | 1.17716300  | -0.42894900 |
| C | 0.33948400  | -3.42498200 | 0.34328600  |
| C | 0.78135900  | -4.74466400 | 0.26440000  |
| C | 1.06748200  | -5.45449400 | 1.42520800  |
| C | 0.88938500  | -4.82516800 | 2.65734600  |
| C | 0.44029600  | -3.50604400 | 2.72808000  |
| C | 0.16173100  | -2.78837800 | 1.56580000  |
| C | 0.01203800  | -2.89017000 | -1.03823900 |
| C | -0.02512300 | -4.17007800 | -1.93088200 |
| C | 0.84855900  | -5.19241900 | -1.17494400 |
| H | 1.40717900  | -6.48497400 | 1.37516600  |
| H | 1.09906400  | -5.37012100 | 3.57263500  |
| H | 0.31640700  | -3.02573200 | 3.69318700  |
| H | -0.15698200 | -1.74973700 | 1.62591800  |
| H | 0.35126300  | -3.96291300 | -2.93362700 |
| H | 0.48352000  | -6.20895500 | -1.34638100 |
| H | 0.73645300  | -2.16286500 | -1.40668500 |
| H | 1.88099500  | -5.13975100 | -1.54257900 |
| C | -2.39682400 | -3.04276700 | -0.77511400 |
| C | -1.62128100 | -0.97396100 | -0.68622800 |
| N | -3.39863400 | -2.37149200 | -0.31845400 |
| N | -1.30243500 | -2.25389400 | -1.03657900 |
| N | -2.92029100 | -1.07065700 | -0.25907300 |
| C | -2.24847300 | -4.50601200 | -1.05984500 |
| H | -1.89908800 | -5.03321300 | -0.16202500 |
| H | -3.20574500 | -4.92803200 | -1.36837500 |
| C | -3.85364600 | -0.02731600 | -0.07303700 |
| C | -4.27870200 | 0.76395100  | -1.14661300 |
| C | -4.39856400 | 0.21019700  | 1.19192800  |
| C | -5.19788600 | 1.78797000  | -0.96108100 |
| C | -5.33558000 | 1.21494000  | 1.39631300  |
| C | -5.71590300 | 1.99610800  | 0.31191300  |
| H | -5.51126400 | 2.39960600  | -1.79801900 |

|    |             |             |             |
|----|-------------|-------------|-------------|
| H  | -5.74862400 | 1.38791400  | 2.38230100  |
| Cl | -3.65626400 | 0.47142600  | -2.73286100 |
| Cl | -6.87244800 | 3.26802700  | 0.55350700  |
| Cl | -3.86922300 | -0.74038200 | 2.53664600  |
| O  | -1.35244400 | -4.64271200 | -2.14488500 |

TS5RS'

|   |             |             |             |
|---|-------------|-------------|-------------|
| C | 0.78611400  | 0.01508300  | -1.24133600 |
| O | -0.19616300 | 0.11798500  | -2.19759400 |
| C | 1.37481300  | -1.17601800 | -0.82733500 |
| C | 1.11180000  | -2.46501100 | -1.29276800 |
| H | 1.99161500  | -1.09659300 | 0.06401200  |
| C | 0.82314800  | -2.78247500 | -2.74267700 |
| H | -0.71359200 | -0.71616700 | -2.23891400 |
| H | 1.68463900  | -3.23740000 | -0.78641900 |
| H | 0.02722600  | -3.52447400 | -2.86226600 |
| H | 1.73307600  | -3.19367700 | -3.19352800 |
| H | 0.53860900  | -1.90440800 | -3.32129000 |
| C | -2.13062900 | -1.11388900 | 0.91050700  |
| O | -1.66015700 | -1.13554500 | 2.05122700  |
| C | -1.74055000 | -2.02349400 | -0.15580600 |
| C | -0.66240400 | -2.94498700 | -0.12898000 |
| H | -0.77927800 | -3.73190800 | -0.87358300 |
| C | -3.14729100 | -0.02698600 | 0.61792900  |
| C | -3.30585100 | 0.57956000  | -0.63132900 |
| C | -3.87567300 | 0.46996000  | 1.70296000  |
| C | -4.18252500 | 1.65069800  | -0.79340600 |
| H | -2.71905600 | 0.25182900  | -1.48400500 |
| C | -4.75374600 | 1.53402600  | 1.54392000  |
| H | -3.71278500 | 0.01921400  | 2.67639200  |
| C | -4.90933000 | 2.12968400  | 0.29233800  |
| H | -4.29118100 | 2.11255300  | -1.77096300 |
| H | -5.30826700 | 1.91029000  | 2.39803000  |
| H | -5.59205400 | 2.96497100  | 0.16649000  |
| C | 0.03485200  | -3.45457600 | 1.08780000  |
| C | 0.10543700  | -4.84285500 | 1.25023300  |
| C | 0.68971700  | -2.64519900 | 2.02536200  |
| C | 0.78340800  | -5.41067000 | 2.32682800  |
| H | -0.38243300 | -5.48741100 | 0.52337900  |
| C | 1.38162800  | -3.20968200 | 3.08851200  |
| H | 0.64374700  | -1.56820700 | 1.92218200  |
| C | 1.42748000  | -4.59478200 | 3.24970000  |
| H | 0.81294900  | -6.49030000 | 2.43558500  |
| H | 1.88518400  | -2.56238500 | 3.80019800  |

|   |             |             |             |
|---|-------------|-------------|-------------|
| H | 1.96361800  | -5.03158400 | 4.08635000  |
| C | -2.53331300 | -2.09206800 | -1.39364100 |
| O | -1.98147500 | -2.02450500 | -2.50069000 |
| C | -4.01017800 | -2.33215700 | -1.34256500 |
| C | -4.63388200 | -2.83554500 | -0.19838900 |
| C | -4.76750400 | -2.08182700 | -2.49058600 |
| C | -6.00534400 | -3.07145600 | -0.19955600 |
| H | -4.04094900 | -3.05249900 | 0.68505400  |
| C | -6.13687600 | -2.31229300 | -2.48888600 |
| H | -4.26067600 | -1.70112900 | -3.37157100 |
| C | -6.75744700 | -2.80667400 | -1.34140000 |
| H | -6.48599400 | -3.46582200 | 0.68978300  |
| H | -6.72334300 | -2.10637800 | -3.37860300 |
| H | -7.82771100 | -2.98827100 | -1.33941400 |
| C | -1.19904300 | 2.76880100  | 0.79364200  |
| C | -1.95880200 | 3.90487400  | 1.06451400  |
| C | -2.39185300 | 4.15798200  | 2.36163900  |
| C | -2.04660700 | 3.26134600  | 3.37281000  |
| C | -1.28316500 | 2.12687200  | 3.09369700  |
| C | -0.84725800 | 1.87316100  | 1.79531300  |
| C | -0.78639100 | 2.73742100  | -0.66478200 |
| C | -1.08901000 | 4.18434100  | -1.16749900 |
| C | -2.15966300 | 4.71700500  | -0.19133100 |
| H | -2.97804200 | 5.04416500  | 2.58713200  |
| H | -2.37526900 | 3.44897400  | 4.39036100  |
| H | -1.03745900 | 1.42587400  | 3.88429700  |
| H | -0.27017900 | 0.97835800  | 1.57354900  |
| H | -1.43788600 | 4.17608600  | -2.20094200 |
| H | -2.04390100 | 5.79540600  | -0.05021800 |
| H | -1.32089900 | 1.98908400  | -1.25002600 |
| H | -3.15956500 | 4.53715300  | -0.60490700 |
| C | 1.51909600  | 3.39222700  | -0.27443900 |
| C | 1.27430200  | 1.25153300  | -0.76827600 |
| N | 2.66621000  | 2.88518600  | 0.02630800  |
| N | 0.64379100  | 2.46078200  | -0.77856300 |
| N | 2.51953900  | 1.54189900  | -0.28063300 |
| C | 1.00744900  | 4.79511300  | -0.15427800 |
| H | 0.55895500  | 4.94670200  | 0.83673300  |
| H | 1.82157200  | 5.50784000  | -0.28928900 |
| C | 3.67768200  | 0.73333000  | -0.29314600 |
| C | 4.36019100  | 0.47908300  | -1.48615700 |
| C | 4.18449600  | 0.20793800  | 0.89825800  |
| C | 5.51513300  | -0.29234900 | -1.49894400 |
| C | 5.34468100  | -0.55427600 | 0.91308900  |

|    |            |             |             |
|----|------------|-------------|-------------|
| C  | 5.99281600 | -0.79389500 | -0.29339400 |
| H  | 6.03365300 | -0.48816000 | -2.42936200 |
| H  | 5.72651300 | -0.95816100 | 1.84241100  |
| Cl | 3.75701500 | 1.13047600  | -2.96829700 |
| Cl | 7.44034000 | -1.74967600 | -0.29410500 |
| Cl | 3.32260700 | 0.48131600  | 2.37441800  |
| O  | 0.07699300 | 5.00258400  | -1.19789000 |

TS5SR

|    |             |             |             |
|----|-------------|-------------|-------------|
| C  | 3.89386400  | -1.60990500 | 0.11741700  |
| C  | 5.07492800  | -1.33729500 | -0.56916500 |
| C  | 6.23662000  | -2.04434700 | -0.26698800 |
| C  | 6.19187900  | -3.02551600 | 0.71988000  |
| C  | 5.00290100  | -3.29564200 | 1.40221800  |
| C  | 3.84153700  | -2.58582500 | 1.10907100  |
| C  | 2.77393200  | -0.71051800 | -0.35218300 |
| C  | 3.36503600  | 0.05668400  | -1.59570500 |
| C  | 4.88238600  | -0.24747700 | -1.59089300 |
| H  | 7.16153800  | -1.83795700 | -0.79791800 |
| H  | 7.08874300  | -3.58718300 | 0.96177400  |
| H  | 4.98606100  | -4.06190600 | 2.17070000  |
| H  | 2.91509700  | -2.77002800 | 1.64365500  |
| H  | 3.15643400  | 1.12189300  | -1.47839700 |
| H  | 5.20336100  | -0.54450400 | -2.59514500 |
| H  | 2.47948000  | 0.00665200  | 0.40861600  |
| H  | 5.44489000  | 0.65179400  | -1.32177300 |
| C  | 1.35079700  | -1.90225600 | -1.97314800 |
| C  | 0.38765700  | -1.52274200 | -0.02736900 |
| N  | 0.13725600  | -2.31061600 | -2.15460900 |
| N  | 1.56049100  | -1.43718700 | -0.70406700 |
| N  | -0.45844700 | -2.09633800 | -0.92869800 |
| C  | 2.44327500  | -1.66423100 | -2.95943400 |
| H  | 3.30789000  | -2.31225400 | -2.75595300 |
| H  | 2.08372700  | -1.84090000 | -3.97270400 |
| C  | -1.78318400 | -2.54137300 | -0.72973800 |
| C  | -2.84629300 | -1.89179200 | -1.36645700 |
| C  | -2.05818400 | -3.64462000 | 0.08446100  |
| C  | -4.15710200 | -2.31227400 | -1.18487100 |
| C  | -3.36273300 | -4.07390900 | 0.28936300  |
| C  | -4.39514000 | -3.39787000 | -0.35053200 |
| H  | -4.97216500 | -1.79804300 | -1.67880200 |
| H  | -3.56586800 | -4.92486300 | 0.92756100  |
| Cl | -2.52997300 | -0.52087600 | -2.37520000 |
| Cl | -6.02936300 | -3.92951900 | -0.10488000 |

|    |             |             |             |
|----|-------------|-------------|-------------|
| Cl | -0.76171100 | -4.49738900 | 0.84544900  |
| O  | 2.76723000  | -0.29373000 | -2.83585600 |
| C  | 0.14041300  | -1.12156300 | 1.31349100  |
| O  | 1.23936400  | -1.13722800 | 2.13135600  |
| C  | -1.12677500 | -0.72365600 | 1.70656900  |
| C  | -1.49647700 | -0.03805100 | 2.86487400  |
| H  | -1.88016700 | -0.73785400 | 0.92338700  |
| C  | -0.80116000 | -0.12301600 | 4.20228600  |
| H  | 1.31947300  | -0.24703600 | 2.56754000  |
| H  | -2.56030100 | 0.17247400  | 2.93188200  |
| H  | -0.46402900 | 0.85751000  | 4.55590500  |
| H  | -1.49853600 | -0.52330100 | 4.94503500  |
| H  | 0.07173700  | -0.77398300 | 4.17636500  |
| C  | -0.05674600 | 2.09800200  | -0.34678400 |
| O  | 0.59680600  | 1.31587900  | -1.03240500 |
| C  | 0.00731300  | 2.04601700  | 1.13939000  |
| C  | -1.10517700 | 1.97992000  | 2.01290400  |
| H  | -0.87159600 | 2.24596900  | 3.04207800  |
| C  | -0.86786100 | 3.15351600  | -1.04257000 |
| C  | -1.27426700 | 4.32233800  | -0.39486000 |
| C  | -1.19489200 | 2.95784700  | -2.38670300 |
| C  | -2.02466500 | 5.27352100  | -1.07791700 |
| H  | -1.00734700 | 4.47478100  | 0.64685000  |
| C  | -1.95361800 | 3.90318800  | -3.06611900 |
| H  | -0.84243000 | 2.05527000  | -2.87644000 |
| C  | -2.37295800 | 5.06019700  | -2.40995600 |
| H  | -2.34095000 | 6.17896400  | -0.57022600 |
| H  | -2.21672000 | 3.74278800  | -4.10688600 |
| H  | -2.96634200 | 5.79905500  | -2.93956500 |
| C  | -2.49542400 | 2.27082100  | 1.59820800  |
| C  | -3.28702200 | 3.11345500  | 2.38735000  |
| C  | -3.06162100 | 1.72293100  | 0.43957200  |
| C  | -4.58809900 | 3.43178700  | 2.00759800  |
| H  | -2.86876600 | 3.53471400  | 3.29774500  |
| C  | -4.35898200 | 2.03720900  | 0.05886700  |
| H  | -2.46678000 | 1.06217800  | -0.18346700 |
| C  | -5.12796600 | 2.89966700  | 0.83965200  |
| H  | -5.18141300 | 4.09762300  | 2.62654400  |
| H  | -4.76702500 | 1.61096500  | -0.85299300 |
| H  | -6.14129300 | 3.15020000  | 0.54295500  |
| C  | 1.29871900  | 1.90000300  | 1.75080800  |
| O  | 1.42748100  | 1.38203500  | 2.88752200  |
| C  | 2.55258200  | 2.40925400  | 1.09088700  |
| C  | 2.56204300  | 3.44801700  | 0.15588700  |

|   |            |            |             |
|---|------------|------------|-------------|
| C | 3.76888100 | 1.83497700 | 1.47905700  |
| C | 3.76018800 | 3.87484100 | -0.41036300 |
| H | 1.63409100 | 3.93717500 | -0.12619900 |
| C | 4.96484000 | 2.25202700 | 0.90647400  |
| H | 3.75355800 | 1.04747900 | 2.22729200  |
| C | 4.96223100 | 3.27226400 | -0.04490000 |
| H | 3.75458400 | 4.68367000 | -1.13390600 |
| H | 5.89793300 | 1.78215400 | 1.20308000  |
| H | 5.89472200 | 3.60453900 | -0.49094500 |

TS5SS'

|   |             |             |             |
|---|-------------|-------------|-------------|
| C | 0.78082700  | -3.43585300 | 0.76977200  |
| C | 1.61294800  | -4.41375400 | 0.23028900  |
| C | 2.20422900  | -5.35644700 | 1.06659800  |
| C | 1.94494400  | -5.30053600 | 2.43500000  |
| C | 1.11294100  | -4.31198900 | 2.96654400  |
| C | 0.52410700  | -3.36254600 | 2.13428000  |
| C | 0.29763900  | -2.50031400 | -0.30954800 |
| C | 0.69795800  | -3.19538400 | -1.65824800 |
| C | 1.76227600  | -4.24050800 | -1.26077700 |
| H | 2.85605700  | -6.12448500 | 0.66036400  |
| H | 2.39515800  | -6.03334300 | 3.09741700  |
| H | 0.92787700  | -4.28238100 | 4.03537200  |
| H | -0.11049200 | -2.57435900 | 2.52974900  |
| H | 1.08718000  | -2.43957900 | -2.34431700 |
| H | 1.60792900  | -5.16451800 | -1.82615900 |
| H | 0.78595900  | -1.53080800 | -0.23177500 |
| H | 2.76223300  | -3.86237900 | -1.50251100 |
| C | -2.03509300 | -3.00063900 | -0.92740400 |
| C | -1.71309100 | -1.02080000 | -0.00819400 |
| N | -3.17876100 | -2.41326100 | -1.07320300 |
| N | -1.12378500 | -2.21543500 | -0.27164500 |
| N | -2.98561200 | -1.17848100 | -0.47586100 |
| C | -1.48099900 | -4.23308600 | -1.55874900 |
| H | -1.16623600 | -4.95767400 | -0.79570500 |
| H | -2.21557100 | -4.68974500 | -2.22108800 |
| C | -4.10692400 | -0.37569100 | -0.17230100 |
| C | -4.77406200 | 0.32479200  | -1.18100000 |
| C | -4.59911200 | -0.30098300 | 1.13562800  |
| C | -5.89928300 | 1.09013800  | -0.90298700 |
| C | -5.71076500 | 0.47286800  | 1.44004400  |
| C | -6.34742900 | 1.15669400  | 0.41041200  |
| H | -6.40614900 | 1.62804600  | -1.69442200 |
| H | -6.07830200 | 0.52871600  | 2.45706500  |

|    |             |             |             |
|----|-------------|-------------|-------------|
| Cl | -4.17252700 | 0.25740900  | -2.80093100 |
| Cl | -7.74410100 | 2.11967900  | 0.77695200  |
| Cl | -3.82405000 | -1.19354500 | 2.39863400  |
| O  | -0.39535400 | -3.79092300 | -2.35442100 |
| C  | -1.13787400 | 0.10727300  | 0.60547300  |
| O  | -0.20829700 | -0.17710200 | 1.58364900  |
| C  | -1.52125900 | 1.37614000  | 0.18088200  |
| C  | -1.03713500 | 2.60625100  | 0.60977400  |
| H  | -2.14043900 | 1.37628600  | -0.71576000 |
| C  | -0.60470200 | 2.90033700  | 2.02246300  |
| H  | 0.48764400  | 0.51266800  | 1.61014100  |
| H  | -1.43284000 | 3.46230500  | 0.07099900  |
| H  | 0.34401500  | 3.44569300  | 2.06959200  |
| H  | -1.36192400 | 3.53287900  | 2.49928700  |
| H  | -0.50504600 | 1.99723900  | 2.62416600  |
| C  | 1.85276900  | 0.40524500  | -1.36089900 |
| O  | 1.13034300  | 0.27553900  | -2.35598600 |
| C  | 1.75774700  | 1.51798500  | -0.42937200 |
| C  | 0.84860600  | 2.55131200  | -0.71020300 |
| H  | 0.27708000  | 2.34468800  | -1.61350700 |
| C  | 2.94191500  | -0.62576900 | -1.14375000 |
| C  | 3.22431000  | -1.20559100 | 0.09804300  |
| C  | 3.67717500  | -1.02757700 | -2.26356100 |
| C  | 4.24245100  | -2.14779000 | 0.22277500  |
| H  | 2.63272300  | -0.94497400 | 0.97321900  |
| C  | 4.71442700  | -1.94545700 | -2.13437900 |
| H  | 3.42745100  | -0.59760300 | -3.22867700 |
| C  | 5.00261100  | -2.50411100 | -0.88858400 |
| H  | 4.43175100  | -2.60585900 | 1.18850700  |
| H  | 5.29608000  | -2.23023900 | -3.00551600 |
| H  | 5.80689700  | -3.22614000 | -0.78833900 |
| C  | 1.08377800  | 3.99573400  | -0.48849700 |
| C  | 0.41298900  | 4.89390100  | -1.33561200 |
| C  | 1.95588500  | 4.53020800  | 0.47210700  |
| C  | 0.60327400  | 6.26483400  | -1.23589600 |
| H  | -0.26393000 | 4.49597100  | -2.08772600 |
| C  | 2.14361700  | 5.90622900  | 0.57456800  |
| H  | 2.49509100  | 3.88435700  | 1.15472100  |
| C  | 1.47279000  | 6.77962100  | -0.27501200 |
| H  | 0.07633900  | 6.93257300  | -1.91024800 |
| H  | 2.82466900  | 6.29416500  | 1.32534000  |
| H  | 1.62606100  | 7.85069600  | -0.19190800 |
| C  | 2.59903900  | 1.55525100  | 0.79043600  |
| O  | 2.06145400  | 1.48413800  | 1.89924900  |



|   |            |            |             |
|---|------------|------------|-------------|
| C | 4.08088100 | 1.71744100 | 0.70080200  |
| C | 4.69363100 | 2.10273900 | -0.49380300 |
| C | 4.85459200 | 1.50842500 | 1.84616200  |
| C | 6.07410400 | 2.26611000 | -0.54452500 |
| H | 4.08162300 | 2.28098400 | -1.37342000 |
| C | 6.23280100 | 1.66901400 | 1.79274800  |
| H | 4.35436300 | 1.21497600 | 2.76354000  |
| C | 6.84302900 | 2.04639800 | 0.59606100  |
| H | 6.54977000 | 2.56762100 | -1.47197400 |
| H | 6.83450900 | 1.49849400 | 2.67972700  |
| H | 7.92054700 | 2.17182300 | 0.55438500  |

M5RR

|   |             |             |             |
|---|-------------|-------------|-------------|
| C | 1.18253800  | 3.19105600  | 0.11439700  |
| C | 2.09455500  | 3.88783400  | 0.90390400  |
| C | 2.73519200  | 5.00987700  | 0.38761500  |
| C | 2.44466500  | 5.41181900  | -0.91569000 |
| C | 1.53531700  | 4.69958700  | -1.70109500 |
| C | 0.89507500  | 3.57216100  | -1.19048800 |
| C | 0.65198300  | 1.99614400  | 0.86528800  |
| C | 1.09645200  | 2.21851400  | 2.34648100  |
| C | 2.26619200  | 3.21780800  | 2.24546500  |
| H | 3.45002400  | 5.56420000  | 0.98845300  |
| H | 2.93393800  | 6.28862300  | -1.32804100 |
| H | 1.33039600  | 5.02395800  | -2.71599800 |
| H | 0.20116400  | 2.99275000  | -1.79425400 |
| H | 1.38639400  | 1.25586400  | 2.77332600  |
| H | 2.25129000  | 3.90806700  | 3.09368600  |
| H | 1.04413800  | 1.05408700  | 0.49153900  |
| H | 3.21677600  | 2.67046400  | 2.26840800  |
| C | -1.62494600 | 2.64300000  | 1.57245600  |
| C | -1.54638400 | 1.02056900  | 0.11258400  |
| N | -2.87020000 | 2.30460900  | 1.40189400  |
| N | -0.79685500 | 1.88931800  | 0.78963100  |
| N | -2.80538500 | 1.29681300  | 0.47568400  |
| C | -0.93676600 | 3.51813200  | 2.57193100  |
| H | -0.50151700 | 4.39763200  | 2.07896700  |
| H | -1.63657900 | 3.84015700  | 3.34263500  |
| C | -3.99379700 | 0.72966900  | -0.05698700 |
| C | -4.74265500 | -0.17712800 | 0.69442000  |
| C | -4.43313600 | 1.09990000  | -1.32988800 |
| C | -5.92064200 | -0.71069700 | 0.18888500  |
| C | -5.60496600 | 0.57257100  | -1.85452000 |
| C | -6.33469300 | -0.32415200 | -1.08132000 |

|    |             |             |             |
|----|-------------|-------------|-------------|
| H  | -6.49800000 | -1.41591900 | 0.77374000  |
| H  | -5.94111700 | 0.85983700  | -2.84296100 |
| Cl | -4.18546600 | -0.65963900 | 2.25695700  |
| Cl | -7.80412600 | -0.98071400 | -1.72121000 |
| Cl | -3.50723700 | 2.22045000  | -2.26601500 |
| O  | 0.04296500  | 2.70153700  | 3.18441900  |
| C  | -1.04665600 | -0.05218900 | -0.75175100 |
| O  | -0.17988700 | 0.38762600  | -1.68930600 |
| C  | -1.40361900 | -1.30588100 | -0.44682400 |
| C  | -0.83061400 | -2.50059000 | -1.13270300 |
| H  | -2.09844700 | -1.44847000 | 0.37789800  |
| C  | -1.82665400 | -3.66185800 | -1.15523600 |
| H  | 0.36624700  | -0.35321000 | -2.08401400 |
| H  | -0.61899700 | -2.21179600 | -2.16831400 |
| H  | -2.72350400 | -3.39275600 | -1.72068300 |
| H  | -1.37501600 | -4.54023600 | -1.62610300 |
| H  | -2.12609600 | -3.94671900 | -0.14263400 |
| C  | 1.93827200  | -1.11543900 | 0.68756300  |
| O  | 1.22308700  | -1.09489900 | 1.71977600  |
| C  | 1.66867500  | -1.86889700 | -0.47656600 |
| C  | 0.56897400  | -2.93204800 | -0.57041500 |
| H  | 0.91837800  | -3.60867400 | -1.36292100 |
| C  | 3.13315000  | -0.17191800 | 0.72167900  |
| C  | 3.38119100  | 0.80248900  | -0.24969700 |
| C  | 3.97787000  | -0.23501800 | 1.83550000  |
| C  | 4.47233000  | 1.66118400  | -0.14088300 |
| H  | 2.70878300  | 0.90167800  | -1.10010400 |
| C  | 5.08427500  | 0.60306600  | 1.93571500  |
| H  | 3.75874700  | -0.96193000 | 2.61213300  |
| C  | 5.33802900  | 1.55210800  | 0.94372800  |
| H  | 4.63634100  | 2.41756000  | -0.90266300 |
| H  | 5.74831700  | 0.52228100  | 2.79119300  |
| H  | 6.19799800  | 2.20988800  | 1.02433100  |
| C  | 0.49933000  | -3.81561900 | 0.66837500  |
| C  | 1.21148300  | -5.01727000 | 0.66129500  |
| C  | -0.26222900 | -3.51130900 | 1.80209200  |
| C  | 1.16905000  | -5.89508400 | 1.74270400  |
| H  | 1.81131400  | -5.26818300 | -0.21079000 |
| C  | -0.32158600 | -4.39025500 | 2.87821900  |
| H  | -0.77897700 | -2.56033100 | 1.85452100  |
| C  | 0.39342700  | -5.58668300 | 2.85490300  |
| H  | 1.73500100  | -6.82115100 | 1.70960600  |
| H  | -0.92026700 | -4.13327800 | 3.74703600  |
| H  | 0.34809300  | -6.26824800 | 3.69871800  |

|   |            |             |             |
|---|------------|-------------|-------------|
| C | 2.28855700 | -1.58082500 | -1.75031900 |
| O | 1.56539700 | -1.38145800 | -2.75927500 |
| C | 3.77172600 | -1.59054500 | -1.96111700 |
| C | 4.62754800 | -2.23286400 | -1.06360100 |
| C | 4.29965400 | -0.97430900 | -3.09827900 |
| C | 6.00102000 | -2.22581100 | -1.28196700 |
| H | 4.20030800 | -2.72660100 | -0.19572700 |
| C | 5.67166500 | -0.96902600 | -3.31816000 |
| H | 3.61399600 | -0.49657800 | -3.79076400 |
| C | 6.52452200 | -1.59012800 | -2.40602200 |
| H | 6.66387000 | -2.71965200 | -0.57847900 |
| H | 6.08042200 | -0.48063400 | -4.19736300 |
| H | 7.59701700 | -1.58362700 | -2.57520400 |

M5RS

|   |             |             |             |
|---|-------------|-------------|-------------|
| C | -0.57448600 | -3.20740000 | -0.37714500 |
| C | -1.34010000 | -4.18193200 | 0.25808900  |
| C | -1.82305700 | -5.26340900 | -0.47243900 |
| C | -1.52935500 | -5.34263000 | -1.83274200 |
| C | -0.77174500 | -4.35156000 | -2.46242700 |
| C | -0.28666600 | -3.26626300 | -1.73627200 |
| C | -0.18133400 | -2.12209100 | 0.59569400  |
| C | -0.58787100 | -2.68269700 | 2.00638900  |
| C | -1.57355300 | -3.83076300 | 1.70525700  |
| H | -2.42369700 | -6.03023000 | 0.00771200  |
| H | -1.89761400 | -6.18301800 | -2.41279100 |
| H | -0.56407600 | -4.42664800 | -3.52468700 |
| H | 0.28518100  | -2.47303000 | -2.21125200 |
| H | -1.04006900 | -1.88519700 | 2.60042800  |
| H | -1.40541800 | -4.66106700 | 2.39757800  |
| H | -0.66797300 | -1.16429600 | 0.38479400  |
| H | -2.60368500 | -3.48033600 | 1.84311700  |
| C | 2.16189400  | -2.66666700 | 1.20223400  |
| C | 1.91711300  | -0.82347900 | 0.05810600  |
| N | 3.36759300  | -2.18713300 | 1.10455200  |
| N | 1.25637100  | -1.86706100 | 0.56191700  |
| N | 3.19780200  | -1.03845500 | 0.37478300  |
| C | 1.57299100  | -3.75163100 | 2.04677200  |
| H | 1.21105400  | -4.58140800 | 1.42540500  |
| H | 2.30858700  | -4.12170800 | 2.76010600  |
| C | 4.31101100  | -0.23803600 | 0.00471900  |
| C | 4.98656100  | 0.51450300  | 0.96742800  |
| C | 4.74652500  | -0.20907900 | -1.32243400 |
| C | 6.09093100  | 1.28083800  | 0.61979700  |

|    |             |             |             |
|----|-------------|-------------|-------------|
| C  | 5.84377500  | 0.55797000  | -1.68962800 |
| C  | 6.50383000  | 1.28923500  | -0.70801800 |
| H  | 6.61137800  | 1.86269200  | 1.37032900  |
| H  | 6.17582500  | 0.58020000  | -2.72012800 |
| Cl | 4.43067500  | 0.51500600  | 2.60378400  |
| Cl | 7.87917300  | 2.24212900  | -1.15370300 |
| Cl | 3.91003500  | -1.12624800 | -2.52513600 |
| O  | 0.53105000  | -3.12665700 | 2.77366500  |
| C  | 1.27033700  | 0.33236700  | -0.57974200 |
| O  | 0.50949600  | -0.00852600 | -1.62211700 |
| C  | 1.38085200  | 1.49834200  | 0.07339900  |
| C  | 0.50737400  | 2.69357900  | -0.15638900 |
| H  | 2.03560200  | 1.52251600  | 0.94408400  |
| C  | 1.22924500  | 3.95850600  | 0.31728200  |
| H  | -0.23692900 | 0.70561400  | -1.83361100 |
| H  | 0.27572800  | 2.78339000  | -1.22183900 |
| H  | 2.20177900  | 4.05501500  | -0.17416100 |
| H  | 0.64256000  | 4.85303400  | 0.10164500  |
| H  | 1.39541200  | 3.91904900  | 1.40037300  |
| C  | -2.31722800 | 0.56312800  | 1.28323000  |
| O  | -2.01697400 | 0.74693700  | 2.48073700  |
| C  | -1.74538000 | 1.32360500  | 0.21238900  |
| C  | -0.80951800 | 2.45983200  | 0.64492200  |
| H  | -0.50823500 | 2.21580900  | 1.66948000  |
| C  | -3.24773700 | -0.60920200 | 1.01262400  |
| C  | -3.23708500 | -1.39603700 | -0.14358500 |
| C  | -4.14639300 | -0.93769300 | 2.03430500  |
| C  | -4.13101000 | -2.45400300 | -0.29466400 |
| H  | -2.51967000 | -1.19705200 | -0.93527900 |
| C  | -5.04230800 | -1.99048900 | 1.88711000  |
| H  | -4.12277700 | -0.34145100 | 2.94014900  |
| C  | -5.04093400 | -2.75035500 | 0.71618400  |
| H  | -4.09851200 | -3.05528500 | -1.19841000 |
| H  | -5.74407700 | -2.21941400 | 2.68341100  |
| H  | -5.74056600 | -3.57206900 | 0.59763400  |
| C  | -1.66858700 | 3.71383500  | 0.72387700  |
| C  | -2.15848900 | 4.14350600  | 1.95854900  |
| C  | -2.05582800 | 4.40595200  | -0.43113300 |
| C  | -3.00885300 | 5.24530500  | 2.04346100  |
| H  | -1.88835000 | 3.58400600  | 2.84993900  |
| C  | -2.90053700 | 5.50749200  | -0.34697200 |
| H  | -1.70524900 | 4.06326300  | -1.40242700 |
| C  | -3.37901400 | 5.93344800  | 0.89208000  |
| H  | -3.38290800 | 5.56457300  | 3.01175400  |

|   |             |            |             |
|---|-------------|------------|-------------|
| H | -3.19163800 | 6.03340100 | -1.25129600 |
| H | -4.03903000 | 6.79294300 | 0.95554100  |
| C | -2.20334400 | 1.31268200 | -1.13472800 |
| O | -1.40766900 | 1.47544800 | -2.11587200 |
| C | -3.65334500 | 1.22921400 | -1.48778900 |
| C | -4.63530400 | 1.71410900 | -0.62042400 |
| C | -4.02397000 | 0.71774600 | -2.73478900 |
| C | -5.97786500 | 1.64673900 | -0.98080500 |
| H | -4.33487500 | 2.15484800 | 0.32647900  |
| C | -5.36440000 | 0.64164100 | -3.08963500 |
| H | -3.24356300 | 0.37257700 | -3.40582300 |
| C | -6.34397500 | 1.10171900 | -2.20892000 |
| H | -6.73775500 | 2.02520800 | -0.30471500 |
| H | -5.65075700 | 0.22630300 | -4.05097000 |
| H | -7.39226700 | 1.04432500 | -2.48598200 |

M5SR'

|   |             |             |             |
|---|-------------|-------------|-------------|
| C | -1.12327700 | 0.20935200  | -0.78566400 |
| O | -0.37779800 | 0.16097600  | -1.88269700 |
| C | -1.25385500 | 1.17434400  | 0.14044100  |
| C | -0.48225500 | 2.46083500  | 0.16740800  |
| H | -1.90161100 | 0.96733500  | 0.99195900  |
| C | -1.29206500 | 3.51134000  | 0.93479500  |
| H | 0.32586600  | 0.98550100  | -1.95621400 |
| H | -0.31858800 | 2.80733400  | -0.85703300 |
| H | -2.29653600 | 3.60747200  | 0.51115000  |
| H | -0.80644600 | 4.48819700  | 0.90075200  |
| H | -1.39117900 | 3.22208800  | 1.98819300  |
| C | 2.63537300  | 0.42191800  | 1.02485100  |
| O | 2.59500200  | 0.55321900  | 2.25760100  |
| C | 1.89133300  | 1.28580400  | 0.13579300  |
| C | 0.89795800  | 2.21139600  | 0.84533100  |
| H | 0.68426500  | 1.74167400  | 1.81361500  |
| C | 3.33732100  | -0.82116400 | 0.49595100  |
| C | 3.10542600  | -1.38614600 | -0.76409800 |
| C | 4.17473600  | -1.50082200 | 1.38284400  |
| C | 3.72224000  | -2.57653200 | -1.13681900 |
| H | 2.43015600  | -0.89920500 | -1.46013000 |
| C | 4.79201000  | -2.69272500 | 1.01656100  |
| H | 4.31318200  | -1.07584500 | 2.37115000  |
| C | 4.57118200  | -3.23415400 | -0.24751300 |
| H | 3.53958800  | -2.99167200 | -2.12461600 |
| H | 5.44361700  | -3.20248500 | 1.71995000  |
| H | 5.05455800  | -4.16241900 | -0.53831700 |

|   |             |             |             |
|---|-------------|-------------|-------------|
| C | 1.61660000  | 3.51870800  | 1.14844000  |
| C | 2.00068500  | 3.82850700  | 2.45303200  |
| C | 1.93582500  | 4.41732900  | 0.12195400  |
| C | 2.67577100  | 5.01556300  | 2.73511300  |
| H | 1.78909100  | 3.11495900  | 3.24440700  |
| C | 2.60512200  | 5.60330200  | 0.40236000  |
| H | 1.66565700  | 4.17389300  | -0.90360300 |
| C | 2.97557700  | 5.90922700  | 1.71222400  |
| H | 2.97016300  | 5.23872100  | 3.75645100  |
| H | 2.84360400  | 6.29028600  | -0.40412400 |
| H | 3.49981200  | 6.83461900  | 1.92960400  |
| C | 2.22323100  | 1.50520400  | -1.21050000 |
| O | 1.35662200  | 1.85332800  | -2.09713000 |
| C | 3.63444100  | 1.43745600  | -1.70036300 |
| C | 4.71433800  | 1.73452200  | -0.86473200 |
| C | 3.86984800  | 1.13359400  | -3.04544500 |
| C | 6.01526700  | 1.68297700  | -1.35840500 |
| H | 4.52567200  | 2.02322900  | 0.16530100  |
| C | 5.16768700  | 1.07535000  | -3.53552400 |
| H | 3.01630100  | 0.93782400  | -3.68690100 |
| C | 6.24404900  | 1.34505300  | -2.68936500 |
| H | 6.85011800  | 1.91630600  | -0.70529800 |
| H | 5.34593800  | 0.82296500  | -4.57635000 |
| H | 7.25914900  | 1.30263600  | -3.07231900 |
| C | 0.58309000  | -2.77781900 | 0.90318400  |
| C | 1.17244300  | -4.01599900 | 1.14268400  |
| C | 1.73318500  | -4.28624500 | 2.38737100  |
| C | 1.69814800  | -3.29871800 | 3.36949700  |
| C | 1.11682900  | -2.05493200 | 3.11535000  |
| C | 0.54536000  | -1.78552300 | 1.87593900  |
| C | 0.07281800  | -2.69020600 | -0.51664800 |
| C | 0.20895700  | -4.14884400 | -1.08148200 |
| C | 1.12457000  | -4.89225400 | -0.08235300 |
| H | 2.19965000  | -5.24685500 | 2.58517900  |
| H | 2.14340300  | -3.49168300 | 4.34042600  |
| H | 1.14002400  | -1.27699700 | 3.86981400  |
| H | 0.12582100  | -0.80474300 | 1.66175100  |
| H | 0.63625000  | -4.12200900 | -2.08419000 |
| H | 0.72938600  | -5.89551300 | 0.10761300  |
| H | 0.61652500  | -1.96091600 | -1.11984700 |
| H | 2.12750600  | -5.00747700 | -0.50637500 |
| C | -2.34609600 | -3.15408700 | -0.24179600 |
| C | -1.85660800 | -1.04809200 | -0.54923300 |
| N | -3.48160000 | -2.53867100 | -0.09744200 |

|    |             |             |             |
|----|-------------|-------------|-------------|
| N  | -1.33560600 | -2.27888300 | -0.53244700 |
| N  | -3.15756900 | -1.22127600 | -0.28669400 |
| C  | -1.97820600 | -4.60368500 | -0.21455200 |
| H  | -1.56271200 | -4.87177500 | 0.76724200  |
| H  | -2.85128500 | -5.22344000 | -0.41817200 |
| C  | -4.16810300 | -0.22202600 | -0.27309500 |
| C  | -4.60380300 | 0.35394300  | -1.46850800 |
| C  | -4.73910700 | 0.17994800  | 0.93507200  |
| C  | -5.59380300 | 1.32684000  | -1.46208100 |
| C  | -5.73646800 | 1.14480900  | 0.96017800  |
| C  | -6.14758500 | 1.70546600  | -0.24418000 |
| H  | -5.92588800 | 1.77589000  | -2.38984300 |
| H  | -6.17374200 | 1.45808600  | 1.90000700  |
| Cl | -3.90088800 | -0.14067500 | -2.96666600 |
| Cl | -7.38734200 | 2.91763300  | -0.22587500 |
| Cl | -4.17511100 | -0.50595500 | 2.41869900  |
| O  | -1.04735200 | -4.79603700 | -1.25951800 |

M5SS

|   |             |             |             |
|---|-------------|-------------|-------------|
| C | -0.83146200 | 0.01974200  | 0.95227200  |
| O | -0.03014300 | 0.10256800  | 2.03864500  |
| C | -1.23813600 | -1.07196800 | 0.28795900  |
| C | -0.91074700 | -2.45622700 | 0.74342800  |
| H | -1.85417000 | -0.93097700 | -0.59729000 |
| C | -2.09210300 | -3.39972900 | 0.49784700  |
| H | 0.43555700  | -0.75697000 | 2.23507900  |
| H | -0.76619200 | -2.38998800 | 1.82855500  |
| H | -2.97101300 | -3.06841600 | 1.06049100  |
| H | -1.83908800 | -4.41386600 | 0.82099100  |
| H | -2.35871500 | -3.44762000 | -0.56092900 |
| C | 1.90409700  | -1.12211700 | -0.68855600 |
| O | 1.24079800  | -1.04264800 | -1.74985600 |
| C | 1.63577000  | -2.05503900 | 0.33977000  |
| C | 0.45875600  | -3.01962400 | 0.24087800  |
| H | 0.66873800  | -3.79709000 | 0.98707200  |
| C | 2.95893900  | -0.04335900 | -0.50339400 |
| C | 3.15121400  | 0.66257900  | 0.68747700  |
| C | 3.68261800  | 0.35193000  | -1.63274000 |
| C | 4.05242100  | 1.72391900  | 0.75355900  |
| H | 2.57778700  | 0.39923400  | 1.57239000  |
| C | 4.58996500  | 1.40326100  | -1.57105700 |
| H | 3.49658800  | -0.16888900 | -2.56694200 |
| C | 4.77571100  | 2.09748600  | -0.37591800 |
| H | 4.18819100  | 2.25660600  | 1.69131400  |

|   |             |             |             |
|---|-------------|-------------|-------------|
| H | 5.14327200  | 1.69361400  | -2.45918200 |
| H | 5.47789500  | 2.92468000  | -0.32701800 |
| C | 0.41734400  | -3.77278000 | -1.08257400 |
| C | 1.13851700  | -4.96512400 | -1.17350700 |
| C | -0.30715100 | -3.35803000 | -2.20392500 |
| C | 1.14080400  | -5.72767000 | -2.33973600 |
| H | 1.71479300  | -5.29539300 | -0.31186700 |
| C | -0.32376400 | -4.12181800 | -3.36625500 |
| H | -0.83384700 | -2.41037900 | -2.17273700 |
| C | 0.40093800  | -5.31037700 | -3.44087800 |
| H | 1.71388700  | -6.64903500 | -2.38172400 |
| H | -0.89552800 | -3.78142800 | -4.22461500 |
| H | 0.39041900  | -5.90206900 | -4.35108900 |
| C | 2.26049100  | -2.02298900 | 1.63350900  |
| O | 1.55623600  | -2.04391800 | 2.67718000  |
| C | 3.75052800  | -2.04323000 | 1.80510800  |
| C | 4.59741200  | -2.45736400 | 0.77445700  |
| C | 4.29544000  | -1.67982300 | 3.03941500  |
| C | 5.97527900  | -2.47601600 | 0.96627000  |
| H | 4.16153700  | -2.76476700 | -0.17139400 |
| C | 5.67143300  | -1.69995100 | 3.23212200  |
| H | 3.61770400  | -1.37805200 | 3.83176800  |
| C | 6.51415400  | -2.09407700 | 2.19286500  |
| H | 6.62892400  | -2.79494200 | 0.16055700  |
| H | 6.09089500  | -1.40764700 | 4.19002900  |
| H | 7.58951200  | -2.10934900 | 2.34221300  |
| C | 1.17790200  | 2.93988200  | -0.96518500 |
| C | 1.87621600  | 4.13124900  | -1.14957900 |
| C | 2.37584500  | 4.45496100  | -2.40613200 |
| C | 2.15770800  | 3.56967700  | -3.46143900 |
| C | 1.46755300  | 2.37337500  | -3.26207000 |
| C | 0.96879400  | 2.04129100  | -2.00395600 |
| C | 0.69726600  | 2.82076000  | 0.46507300  |
| C | 0.93624400  | 4.24542600  | 1.07307000  |
| C | 1.98581300  | 4.89321800  | 0.14647600  |
| H | 2.91936100  | 5.38167800  | -2.56450700 |
| H | 2.53731100  | 3.81121800  | -4.44949000 |
| H | 1.33282100  | 1.67932200  | -4.08502200 |
| H | 0.49666900  | 1.07329800  | -1.84387600 |
| H | 1.28317400  | 4.17066400  | 2.10414000  |
| H | 1.79727100  | 5.96677000  | 0.05554600  |
| H | 1.20960000  | 2.04162200  | 1.02986200  |
| H | 2.98633700  | 4.76461800  | 0.57550800  |
| C | -1.66176300 | 3.45598900  | 0.15841800  |



|    |             |             |             |
|----|-------------|-------------|-------------|
| C  | -1.36737600 | 1.32964500  | 0.56928200  |
| N  | -2.84851300 | 2.94157700  | 0.03848200  |
| N  | -0.73433000 | 2.50501500  | 0.49054200  |
| N  | -2.65083500 | 1.61346400  | 0.29361900  |
| C  | -1.17180000 | 4.86769300  | 0.09320100  |
| H  | -0.71048600 | 5.06942300  | -0.88248400 |
| H  | -1.99610400 | 5.56207800  | 0.25522000  |
| C  | -3.76346100 | 0.72922900  | 0.35187700  |
| C  | -4.24991800 | 0.28978500  | 1.58536000  |
| C  | -4.37897500 | 0.30163600  | -0.82487400 |
| C  | -5.33736000 | -0.57063500 | 1.64780400  |
| C  | -5.47251100 | -0.55260300 | -0.78187700 |
| C  | -5.93561600 | -0.97614700 | 0.45912500  |
| H  | -5.70925100 | -0.91504100 | 2.60489200  |
| H  | -5.94400600 | -0.88629700 | -1.69792200 |
| Cl | -3.47965700 | 0.80141300  | 3.04443600  |
| Cl | -7.29728000 | -2.04457600 | 0.52688500  |
| Cl | -3.74357900 | 0.80529300  | -2.35129800 |
| O  | -0.25858200 | 5.01656900  | 1.16224900  |

M5RR'

|   |             |             |             |
|---|-------------|-------------|-------------|
| C | -1.14894700 | 0.27278600  | -0.67097200 |
| O | -0.41260200 | 0.26493300  | -1.76985300 |
| C | -1.28979600 | 1.17586500  | 0.31697500  |
| C | -0.53427500 | 2.47097000  | 0.44706600  |
| H | -1.95548700 | 0.89708100  | 1.13168800  |
| C | -0.77844100 | 3.42403400  | -0.73070300 |
| H | 0.34624200  | 1.06585100  | -1.85555700 |
| H | -0.96842200 | 2.97944500  | 1.31763900  |
| H | -0.31464400 | 4.39311200  | -0.53034200 |
| H | -1.85620500 | 3.58346200  | -0.83721700 |
| H | -0.38440100 | 3.05014300  | -1.67317800 |
| C | 2.66028100  | 0.40273900  | 1.05532500  |
| O | 2.62564600  | 0.51894600  | 2.28791900  |
| C | 1.91485600  | 1.28552600  | 0.17581600  |
| C | 0.93615700  | 2.19635100  | 0.92354400  |
| H | 0.79626400  | 1.68842800  | 1.88332000  |
| C | 3.36079200  | -0.83769700 | 0.51389800  |
| C | 3.13504300  | -1.39587300 | -0.75067100 |
| C | 4.19701300  | -1.52225500 | 1.39862600  |
| C | 3.75705700  | -2.58199900 | -1.12869300 |
| H | 2.46626000  | -0.90652500 | -1.45091600 |
| C | 4.81803400  | -2.71062600 | 1.02747200  |
| H | 4.33276400  | -1.10318900 | 2.38967800  |

|   |            |             |             |
|---|------------|-------------|-------------|
| C | 4.60374600 | -3.24408700 | -0.24081400 |
| H | 3.58098600 | -2.98968200 | -2.12078600 |
| H | 5.46816000 | -3.22302600 | 1.73027400  |
| H | 5.09061300 | -4.16899900 | -0.53632100 |
| C | 1.62463400 | 3.51270000  | 1.26435300  |
| C | 1.69471200 | 3.93985400  | 2.59113200  |
| C | 2.19636500 | 4.32101100  | 0.27404200  |
| C | 2.30792400 | 5.14586300  | 2.92677000  |
| H | 1.27865600 | 3.30596700  | 3.37027900  |
| C | 2.80612700 | 5.52686400  | 0.60402300  |
| H | 2.15655000 | 4.00139800  | -0.76455100 |
| C | 2.86368600 | 5.94496400  | 1.93303600  |
| H | 2.35865900 | 5.45484900  | 3.96664100  |
| H | 3.24232000 | 6.14060800  | -0.17835900 |
| H | 3.34589100 | 6.88298400  | 2.19019100  |
| C | 2.25566100 | 1.49099400  | -1.16675200 |
| O | 1.39338700 | 1.83025600  | -2.06173800 |
| C | 3.66809500 | 1.42220900  | -1.65207000 |
| C | 4.74404700 | 1.72178900  | -0.81213600 |
| C | 3.90985200 | 1.11762100  | -2.99589600 |
| C | 6.04734200 | 1.67001400  | -1.29932600 |
| H | 4.54990100 | 2.01253700  | 0.21629700  |
| C | 5.21009800 | 1.06044700  | -3.47981200 |
| H | 3.05985400 | 0.92015500  | -3.64147800 |
| C | 6.28245900 | 1.33102200  | -2.62888900 |
| H | 6.87889700 | 1.90402600  | -0.64230600 |
| H | 5.39322100 | 0.80776700  | -4.51969500 |
| H | 7.29930300 | 1.28885200  | -3.00713900 |
| C | 0.58095800 | -2.76499000 | 0.89889800  |
| C | 1.17783700 | -4.00967100 | 1.07936400  |
| C | 1.74173400 | -4.33512800 | 2.30935000  |
| C | 1.70354300 | -3.39534900 | 3.33671000  |
| C | 1.11653600 | -2.14334300 | 3.14150200  |
| C | 0.54225900 | -1.81869900 | 1.91675200  |
| C | 0.07354000 | -2.61075600 | -0.51624700 |
| C | 0.23737100 | -4.03516800 | -1.15901200 |
| C | 1.14004800 | -4.82724500 | -0.18561100 |
| H | 2.21366700 | -5.30143600 | 2.46125500  |
| H | 2.15103000 | -3.63178400 | 4.29696000  |
| H | 1.13582000 | -1.40350200 | 3.93367200  |
| H | 0.11659900 | -0.83206200 | 1.74792200  |
| H | 0.68595000 | -3.94511500 | -2.14862500 |
| H | 0.73930500 | -5.83665700 | -0.04576900 |
| H | 0.60587600 | -1.83860100 | -1.07449500 |

|    |             |             |             |
|----|-------------|-------------|-------------|
| H  | 2.14727000  | -4.92742400 | -0.60360900 |
| C  | -2.34555200 | -3.12581200 | -0.31178700 |
| C  | -1.88090300 | -1.00031400 | -0.50198500 |
| N  | -3.49463300 | -2.53459700 | -0.17319000 |
| N  | -1.34110100 | -2.22251900 | -0.52565200 |
| N  | -3.18537400 | -1.20458900 | -0.28748900 |
| C  | -1.95609500 | -4.56888000 | -0.36124400 |
| H  | -1.54954600 | -4.88786400 | 0.60892600  |
| H  | -2.81604700 | -5.18884600 | -0.61355000 |
| C  | -4.21127700 | -0.22184000 | -0.25588400 |
| C  | -4.60307200 | 0.42588100  | -1.42987200 |
| C  | -4.84377500 | 0.09039300  | 0.94825000  |
| C  | -5.61421700 | 1.37669400  | -1.40536600 |
| C  | -5.86446900 | 1.02997500  | 0.98970500  |
| C  | -6.23373000 | 1.66045500  | -0.19338300 |
| H  | -5.91133600 | 1.88283100  | -2.31539700 |
| H  | -6.35169800 | 1.27018000  | 1.92640000  |
| Cl | -3.81855400 | 0.05273700  | -2.92195500 |
| Cl | -7.50164700 | 2.84238800  | -0.15487300 |
| Cl | -4.32679800 | -0.67503200 | 2.41106800  |
| O  | -1.00706400 | -4.68392700 | -1.40164300 |

M5RS'

|   |             |             |             |
|---|-------------|-------------|-------------|
| C | 0.88808200  | -0.11891200 | -0.81848900 |
| O | 0.19717700  | -0.08614500 | -1.97174700 |
| C | 1.13757200  | -1.11043800 | 0.05229900  |
| C | 0.80466500  | -2.56166500 | -0.13017900 |
| H | 1.69645100  | -0.82929000 | 0.94196100  |
| C | 1.42912200  | -3.06405400 | -1.44518700 |
| H | -0.38815800 | -0.90168300 | -2.14825500 |
| H | 1.30767800  | -3.09392700 | 0.68154500  |
| H | 1.33097600  | -4.15183700 | -1.50737100 |
| H | 2.49317300  | -2.81039400 | -1.49936100 |
| H | 0.92004400  | -2.63319100 | -2.31148700 |
| C | -1.99626500 | -0.92817100 | 0.78260900  |
| O | -1.36336800 | -0.95513800 | 1.86231400  |
| C | -1.76402600 | -1.85782400 | -0.26214000 |
| C | -0.71583100 | -2.94624700 | -0.07986900 |
| H | -0.85121400 | -3.60123400 | -0.94750500 |
| C | -2.92684100 | 0.25572100  | 0.59412000  |
| C | -3.05647200 | 0.96943400  | -0.60095600 |
| C | -3.59173000 | 0.73309800  | 1.72764500  |
| C | -3.83976900 | 2.12030100  | -0.66582500 |
| H | -2.52247700 | 0.64254300  | -1.48916000 |

|   |             |             |             |
|---|-------------|-------------|-------------|
| C | -4.37709800 | 1.87836800  | 1.66854400  |
| H | -3.44885300 | 0.20168500  | 2.66339900  |
| C | -4.50248400 | 2.57913500  | 0.46951800  |
| H | -3.92834500 | 2.65838200  | -1.60622000 |
| H | -4.88220800 | 2.23492500  | 2.56122600  |
| H | -5.11029900 | 3.47811000  | 0.42313600  |
| C | -1.07196700 | -3.81930300 | 1.12146300  |
| C | -2.03064500 | -4.82184400 | 0.94628100  |
| C | -0.49801600 | -3.67185300 | 2.38599500  |
| C | -2.39504400 | -5.66568400 | 1.99170800  |
| H | -2.49562800 | -4.93872300 | -0.03074500 |
| C | -0.85353900 | -4.51586800 | 3.43411000  |
| H | 0.20909000  | -2.86715100 | 2.55613400  |
| C | -1.80073600 | -5.51894200 | 3.24231900  |
| H | -3.13744800 | -6.44090700 | 1.82731700  |
| H | -0.39507600 | -4.38253100 | 4.40963500  |
| H | -2.07604500 | -6.17612600 | 4.06141300  |
| C | -2.31105400 | -1.77621700 | -1.57920700 |
| O | -1.54761500 | -1.88215000 | -2.58377600 |
| C | -3.77767100 | -1.64577100 | -1.84483200 |
| C | -4.72642200 | -1.98101700 | -0.87581000 |
| C | -4.20179100 | -1.22006000 | -3.10692500 |
| C | -6.08366000 | -1.85944400 | -1.15624600 |
| H | -4.38576400 | -2.33998500 | 0.09074700  |
| C | -5.55711200 | -1.09932800 | -3.38707600 |
| H | -3.44680100 | -0.98496400 | -3.85054200 |
| C | -6.50039600 | -1.41486500 | -2.40921300 |
| H | -6.81752000 | -2.11742300 | -0.39919700 |
| H | -5.88272700 | -0.75986600 | -4.36553800 |
| H | -7.56001400 | -1.32083300 | -2.62677300 |
| C | -0.81536400 | 3.01574400  | 0.92342900  |
| C | -1.39380700 | 4.27084600  | 1.09644600  |
| C | -1.82284100 | 4.66845200  | 2.35836900  |
| C | -1.65847600 | 3.79074300  | 3.42879000  |
| C | -1.09070200 | 2.52904100  | 3.24111300  |
| C | -0.66192100 | 2.12448800  | 1.97887500  |
| C | -0.38890800 | 2.81692400  | -0.51445300 |
| C | -0.54875900 | 4.23211200  | -1.17074900 |
| C | -1.48116000 | 5.00756600  | -0.21567000 |
| H | -2.27462200 | 5.64467100  | 2.50741900  |
| H | -1.98556200 | 4.08889900  | 4.42003700  |
| H | -0.99999800 | 1.84371900  | 4.07728700  |
| H | -0.27918800 | 1.11631900  | 1.82785400  |
| H | -0.96722700 | 4.14271000  | -2.17353700 |

|    |             |             |             |
|----|-------------|-------------|-------------|
| H  | -1.17953300 | 6.05790500  | -0.16428500 |
| H  | -0.96403900 | 2.05224600  | -1.03678800 |
| H  | -2.50877600 | 4.97417400  | -0.59534000 |
| C  | 2.02216800  | 3.29450700  | -0.31874000 |
| C  | 1.54459900  | 1.17496100  | -0.55848000 |
| N  | 3.16539300  | 2.69290600  | -0.17927500 |
| N  | 1.01477600  | 2.40178000  | -0.56348100 |
| N  | 2.85175400  | 1.37073500  | -0.32749900 |
| C  | 1.64630200  | 4.74230200  | -0.33555600 |
| H  | 1.24854300  | 5.04557500  | 0.64244600  |
| H  | 2.51322200  | 5.35600900  | -0.57974100 |
| C  | 3.88318500  | 0.39137500  | -0.31320600 |
| C  | 4.28178000  | -0.23251900 | -1.49772300 |
| C  | 4.51377800  | 0.06071200  | 0.88672900  |
| C  | 5.29767600  | -1.17868800 | -1.48747800 |
| C  | 5.53878200  | -0.87511900 | 0.91396100  |
| C  | 5.91473400  | -1.48237500 | -0.27877400 |
| H  | 5.60002400  | -1.66629600 | -2.40604100 |
| H  | 6.02311500  | -1.13104100 | 1.84801500  |
| Cl | 3.49223500  | 0.15476900  | -2.98314900 |
| Cl | 7.18719700  | -2.65979400 | -0.25789200 |
| Cl | 3.98436200  | 0.79056300  | 2.36230200  |
| O  | 0.69700600  | 4.89339800  | -1.37186000 |

M5SR

|   |             |            |             |
|---|-------------|------------|-------------|
| C | -0.13321100 | 3.75517900 | -0.06220000 |
| C | 0.48272400  | 4.82472100 | 0.58177600  |
| C | 0.32631800  | 6.11600500 | 0.08464600  |
| C | -0.45004100 | 6.30742500 | -1.05658400 |
| C | -1.05584800 | 5.22464700 | -1.70057500 |
| C | -0.90046000 | 3.93029900 | -1.20945100 |
| C | 0.20423400  | 2.45221200 | 0.62101000  |
| C | 0.93031500  | 2.86915700 | 1.94778600  |
| C | 1.31237800  | 4.35313100 | 1.74885700  |
| H | 0.80293400  | 6.95956300 | 0.57556200  |
| H | -0.58269500 | 7.30886100 | -1.45410200 |
| H | -1.64613600 | 5.39535300 | -2.59518600 |
| H | -1.32943800 | 3.06426200 | -1.70877200 |
| H | 1.79878300  | 2.22670900 | 2.09782600  |
| H | 1.13648000  | 4.91318200 | 2.67274800  |
| H | 0.83847200  | 1.80597900 | 0.01451900  |
| H | 2.37860200  | 4.43345900 | 1.50854000  |
| C | -1.77567400 | 1.95614300 | 2.02187200  |
| C | -1.54041100 | 0.64579800 | 0.28705300  |

|    |             |             |             |
|----|-------------|-------------|-------------|
| N  | -2.79469200 | 1.15369000  | 2.09567000  |
| N  | -0.99794900 | 1.68277400  | 0.92994900  |
| N  | -2.63721900 | 0.34425400  | 0.99732000  |
| C  | -1.23600000 | 2.97503900  | 2.97224900  |
| H  | -1.40122100 | 3.99072200  | 2.58702900  |
| H  | -1.71062000 | 2.87500300  | 3.94804000  |
| C  | -3.66877200 | -0.55308300 | 0.61772800  |
| C  | -3.90185000 | -1.72338300 | 1.34041700  |
| C  | -4.48855100 | -0.24689200 | -0.47244700 |
| C  | -4.93336600 | -2.58368800 | 0.98690600  |
| C  | -5.51728900 | -1.09905900 | -0.84829200 |
| C  | -5.72564900 | -2.25658100 | -0.10732300 |
| H  | -5.10755900 | -3.49188300 | 1.55030400  |
| H  | -6.14474500 | -0.85870500 | -1.69729800 |
| Cl | -2.88077900 | -2.12129900 | 2.67726200  |
| Cl | -7.01625500 | -3.32458900 | -0.56016900 |
| Cl | -4.22496000 | 1.20907500  | -1.36675400 |
| O  | 0.13827700  | 2.67590900  | 3.11746100  |
| C  | -0.99740100 | -0.00260000 | -0.93890100 |
| O  | -0.67604400 | 0.82441600  | -1.88347100 |
| C  | -0.84860300 | -1.34489100 | -0.80789700 |
| C  | -0.15155500 | -2.22307600 | -1.80518500 |
| H  | -1.16420300 | -1.79456900 | 0.13062100  |
| C  | -0.67952500 | -2.04506900 | -3.23580100 |
| H  | 0.52932700  | 0.48402000  | -2.71654500 |
| H  | -0.38359800 | -3.25523400 | -1.52274000 |
| H  | -0.21901900 | -2.78486000 | -3.89871800 |
| H  | -1.76297900 | -2.19319500 | -3.25507400 |
| H  | -0.46333300 | -1.05244100 | -3.62895000 |
| C  | 2.33392200  | -0.85555300 | 0.37677500  |
| O  | 1.61676100  | -0.20473700 | 1.12534000  |
| C  | 2.03483700  | -0.87764900 | -1.09951800 |
| C  | 1.43523900  | -2.12434000 | -1.76862300 |
| H  | 1.75151000  | -2.04961000 | -2.81419900 |
| C  | 3.48811300  | -1.62116100 | 0.94691900  |
| C  | 4.51924100  | -2.09585400 | 0.13437800  |
| C  | 3.53434300  | -1.83797500 | 2.32656700  |
| C  | 5.57720900  | -2.80494200 | 0.69358100  |
| H  | 4.48131400  | -1.90939800 | -0.93516700 |
| C  | 4.58914700  | -2.54896600 | 2.88415500  |
| H  | 2.72797300  | -1.44943700 | 2.94007400  |
| C  | 5.60891700  | -3.03698200 | 2.06679100  |
| H  | 6.37285600  | -3.17911500 | 0.05767800  |
| H  | 4.61929000  | -2.72693300 | 3.95434500  |

|   |            |             |             |
|---|------------|-------------|-------------|
| H | 6.43115000 | -3.59602400 | 2.50275200  |
| C | 2.02097700 | -3.40599900 | -1.20699800 |
| C | 2.98664500 | -4.11764900 | -1.91854500 |
| C | 1.62334600 | -3.88983000 | 0.04368800  |
| C | 3.56757300 | -5.26643100 | -1.38433600 |
| H | 3.29884200 | -3.75584400 | -2.89529800 |
| C | 2.20611700 | -5.02879300 | 0.58688800  |
| H | 0.86578500 | -3.34777400 | 0.60863700  |
| C | 3.18649800 | -5.71879500 | -0.12494700 |
| H | 4.32143800 | -5.80437600 | -1.95113300 |
| H | 1.89982400 | -5.37668200 | 1.56856400  |
| H | 3.64363700 | -6.60742300 | 0.29854100  |
| C | 2.13842100 | 0.26311200  | -1.82189000 |
| O | 1.50881700 | 0.35658900  | -3.01884400 |
| C | 2.83652200 | 1.51070900  | -1.40615600 |
| C | 3.92032700 | 1.53510900  | -0.51905200 |
| C | 2.37304700 | 2.72363500  | -1.93308100 |
| C | 4.49879100 | 2.74263100  | -0.14218600 |
| H | 4.33215200 | 0.60723300  | -0.13571500 |
| C | 2.94880800 | 3.93146700  | -1.55352200 |
| H | 1.53617800 | 2.70287000  | -2.62239300 |
| C | 4.01377600 | 3.94586600  | -0.65500300 |
| H | 5.34272500 | 2.74258700  | 0.54051800  |
| H | 2.55515200 | 4.86194700  | -1.95240700 |
| H | 4.47005800 | 4.88689300  | -0.36199900 |

M5SS'

|   |             |            |             |
|---|-------------|------------|-------------|
| C | -0.27341200 | 3.73257000 | -1.15968500 |
| C | 0.17678100  | 5.02492500 | -0.90323100 |
| C | 0.13424200  | 5.98605300 | -1.90916900 |
| C | -0.36201200 | 5.62572600 | -3.16012800 |
| C | -0.79704400 | 4.32179400 | -3.41077800 |
| C | -0.75261100 | 3.35482700 | -2.40970700 |
| C | -0.13843700 | 2.86525300 | 0.07079500  |
| C | 0.21285700  | 3.87116100 | 1.22749800  |
| C | 0.69365500  | 5.15096800 | 0.50855700  |
| H | 0.47935100  | 6.99865800 | -1.72274300 |
| H | -0.40715600 | 6.36631600 | -3.95237600 |
| H | -1.16631300 | 4.05924700 | -4.39664800 |
| H | -1.05269900 | 2.32522700 | -2.58503300 |
| H | 0.97823800  | 3.44231800 | 1.87642300  |
| H | 0.32671600  | 6.03500800 | 1.03840900  |
| H | 0.62054000  | 2.09428700 | -0.06581000 |
| H | 1.78834900  | 5.19989900 | 0.51473000  |

|    |             |             |             |
|----|-------------|-------------|-------------|
| C  | -2.42987400 | 2.82242300  | 0.99637300  |
| C  | -1.77777100 | 0.91090300  | 0.15019700  |
| N  | -3.45262600 | 2.03966400  | 1.15818700  |
| N  | -1.39259800 | 2.17392800  | 0.38101200  |
| N  | -3.03530200 | 0.85229500  | 0.61434000  |
| C  | -2.14978900 | 4.20167500  | 1.49401000  |
| H  | -2.17803800 | 4.92874500  | 0.67139900  |
| H  | -2.87516700 | 4.48562400  | 2.25597600  |
| C  | -3.95616700 | -0.22102200 | 0.48367600  |
| C  | -4.35768600 | -0.94500100 | 1.60700000  |
| C  | -4.48980000 | -0.54030200 | -0.76742400 |
| C  | -5.27964100 | -1.97718300 | 1.49338200  |
| C  | -5.40349800 | -1.57619500 | -0.90253700 |
| C  | -5.78751200 | -2.27827400 | 0.23511300  |
| H  | -5.58419300 | -2.53868900 | 2.36782900  |
| H  | -5.80962500 | -1.82469600 | -1.87522000 |
| Cl | -3.67107400 | -0.58063200 | 3.15140900  |
| Cl | -6.93342900 | -3.56925900 | 0.07855800  |
| Cl | -4.00668800 | 0.35358900  | -2.16471200 |
| O  | -0.87547000 | 4.13312400  | 2.10540800  |
| C  | -0.96105000 | -0.11684400 | -0.53580400 |
| O  | -0.22237900 | 0.38777900  | -1.48455800 |
| C  | -1.07196900 | -1.38506600 | -0.07721600 |
| C  | -0.32655000 | -2.56118400 | -0.64554800 |
| H  | -1.69670900 | -1.55826100 | 0.79495000  |
| C  | -0.41012100 | -2.65687100 | -2.17528800 |
| H  | 0.93359800  | -0.29133800 | -1.79702400 |
| H  | -0.86001500 | -3.45150200 | -0.28524200 |
| H  | -0.01265300 | -3.61845700 | -2.50905700 |
| H  | -1.46278200 | -2.60240300 | -2.47045000 |
| H  | 0.12976000  | -1.86940100 | -2.69545100 |
| C  | 2.74875400  | -1.58503200 | 1.48397800  |
| O  | 2.72482500  | -2.57483300 | 2.20923000  |
| C  | 2.09853600  | -1.59675500 | 0.15214100  |
| C  | 1.07583100  | -2.73191400 | 0.03545600  |
| H  | 0.81925600  | -2.95560900 | 1.07458000  |
| C  | 3.35777800  | -0.32488300 | 2.05848200  |
| C  | 2.98241600  | 0.96068700  | 1.66413200  |
| C  | 4.30173700  | -0.47276800 | 3.07721500  |
| C  | 3.56932500  | 2.07763600  | 2.25011500  |
| H  | 2.23664800  | 1.07425500  | 0.88424600  |
| C  | 4.88835000  | 0.64155400  | 3.66615400  |
| H  | 4.56616200  | -1.47758700 | 3.38996600  |
| C  | 4.52642700  | 1.92124200  | 3.25037800  |



|   |            |             |             |
|---|------------|-------------|-------------|
| H | 3.29160700 | 3.07453700  | 1.91864500  |
| H | 5.63137900 | 0.51353900  | 4.44686800  |
| H | 4.98793500 | 2.79316100  | 3.70313600  |
| C | 1.76772000 | -3.98616800 | -0.48483900 |
| C | 1.63994200 | -5.18725500 | 0.21408000  |
| C | 2.51526800 | -3.97797300 | -1.66800300 |
| C | 2.23584900 | -6.35651500 | -0.25370900 |
| H | 1.08130000 | -5.19786100 | 1.14671400  |
| C | 3.11026700 | -5.14415800 | -2.13916300 |
| H | 2.62010500 | -3.05056200 | -2.22597500 |
| C | 2.97268500 | -6.33869800 | -1.43390700 |
| H | 2.13216900 | -7.27897700 | 0.30978400  |
| H | 3.68578100 | -5.12008400 | -3.05959000 |
| H | 3.44143600 | -7.24688600 | -1.79996100 |
| C | 2.58345500 | -0.85377300 | -0.89487600 |
| O | 1.91519400 | -0.64038100 | -2.02189600 |
| C | 3.95955100 | -0.28923900 | -0.93964000 |
| C | 5.05067600 | -0.98685600 | -0.41546700 |
| C | 4.17131700 | 0.94097300  | -1.57124700 |
| C | 6.32719700 | -0.43605000 | -0.47106900 |
| H | 4.89465900 | -1.96860000 | 0.02355500  |
| C | 5.44431000 | 1.49418800  | -1.61961300 |
| H | 3.32104500 | 1.45335100  | -2.01156900 |
| C | 6.52447500 | 0.80863300  | -1.06322100 |
| H | 7.16957300 | -0.98305900 | -0.05985100 |
| H | 5.59920400 | 2.45814500  | -2.09431300 |
| H | 7.52035400 | 1.23878100  | -1.10525300 |

TS6RR

|   |             |             |             |
|---|-------------|-------------|-------------|
| C | 1.03404400  | 0.46391500  | 0.39923000  |
| O | 0.26972500  | 0.81900200  | 1.45225400  |
| C | 1.35357500  | -0.75314700 | -0.06287800 |
| C | 0.75213500  | -2.00793100 | 0.47758000  |
| H | 1.99315200  | -0.80906500 | -0.94036600 |
| C | 1.76389100  | -3.14829100 | 0.58404000  |
| H | -0.16147300 | 0.04884900  | 1.89482700  |
| H | 0.38554200  | -1.79235400 | 1.47703200  |
| H | 2.54372900  | -2.89988500 | 1.31070200  |
| H | 1.25822200  | -4.05990100 | 0.91855800  |
| H | 2.23863100  | -3.35835400 | -0.37942300 |
| C | -1.79221000 | -0.79151900 | -1.91103000 |
| O | -1.32994300 | 0.26550900  | -2.32156700 |
| C | -1.50880300 | -1.27632400 | -0.52156000 |
| C | -0.51760100 | -2.43352400 | -0.34514500 |

|   |             |             |             |
|---|-------------|-------------|-------------|
| H | -1.02210300 | -3.17394200 | 0.28695500  |
| C | -2.63696000 | -1.66294900 | -2.78133000 |
| C | -3.36766100 | -2.71810000 | -2.22463400 |
| C | -2.69526600 | -1.41047700 | -4.15423900 |
| C | -4.15266700 | -3.51838300 | -3.04955800 |
| H | -3.32130300 | -2.89841000 | -1.15064100 |
| C | -3.47414500 | -2.21711500 | -4.97328800 |
| H | -2.11562600 | -0.58588700 | -4.55748200 |
| C | -4.20253800 | -3.27105900 | -4.41959600 |
| H | -4.72390200 | -4.33561700 | -2.62174500 |
| H | -3.51539200 | -2.03042600 | -6.04159000 |
| H | -4.81182100 | -3.90114600 | -5.06031200 |
| C | -0.12496900 | -3.11717900 | -1.64344000 |
| C | -0.39896500 | -4.47703900 | -1.80489200 |
| C | 0.53007200  | -2.44673700 | -2.68525600 |
| C | -0.03907100 | -5.15099100 | -2.96933100 |
| H | -0.91428800 | -5.00638200 | -1.00756500 |
| C | 0.89260900  | -3.11676400 | -3.84982500 |
| H | 0.72882700  | -1.38175800 | -2.60470700 |
| C | 0.60986200  | -4.47261000 | -3.99675500 |
| H | -0.26958100 | -6.20666000 | -3.07393000 |
| H | 1.39300200  | -2.57544100 | -4.64731100 |
| H | 0.88872100  | -4.99459200 | -4.90657400 |
| C | -2.10179000 | -0.68543400 | 0.53520300  |
| O | -1.74479800 | -1.01765200 | 1.79745500  |
| C | -3.07223300 | 0.44936600  | 0.48482400  |
| C | -4.01689100 | 0.63203700  | -0.53206300 |
| C | -3.02386200 | 1.38492500  | 1.52911500  |
| C | -4.86408600 | 1.73760900  | -0.52032100 |
| H | -4.11941900 | -0.10480300 | -1.32171300 |
| C | -3.86465200 | 2.49212800  | 1.53600800  |
| H | -2.31080500 | 1.23315700  | 2.33297300  |
| C | -4.78566100 | 2.67632800  | 0.50711200  |
| H | -5.59894100 | 1.85601500  | -1.31077300 |
| H | -3.78321900 | 3.22315200  | 2.33560000  |
| H | -5.44277400 | 3.54097600  | 0.51003800  |
| C | -2.34962000 | -2.32932200 | 2.39168500  |
| O | -2.90393800 | -3.05477800 | 1.56505000  |
| O | -0.99792200 | -3.02858600 | 2.91197600  |
| C | -0.07791500 | -2.42591600 | 3.62833100  |
| O | 0.05770300  | -1.21792800 | 3.77785900  |
| C | 0.88289700  | -3.41895600 | 4.26594300  |
| C | 2.09068300  | -2.75545800 | 4.91298600  |
| H | 0.31177900  | -3.99801600 | 5.00285400  |

|   |             |             |             |
|---|-------------|-------------|-------------|
| H | 1.18679800  | -4.13791300 | 3.49616100  |
| C | 3.02114700  | -3.77109300 | 5.56903200  |
| H | 1.74122000  | -2.02425200 | 5.64823400  |
| H | 2.63164300  | -2.18014200 | 4.15292800  |
| H | 3.88189200  | -3.28362800 | 6.03451700  |
| H | 3.39900200  | -4.49120900 | 4.83596300  |
| H | 2.49673500  | -4.33666400 | 6.34595800  |
| C | -3.05674900 | -1.89704100 | 3.67225800  |
| C | -4.47066000 | -1.40639600 | 3.38012700  |
| H | -3.10156700 | -2.77965400 | 4.32171200  |
| H | -2.46281200 | -1.13020600 | 4.17893100  |
| C | -5.21160600 | -0.99853300 | 4.65024100  |
| H | -5.00816600 | -2.20493400 | 2.85969600  |
| H | -4.42578100 | -0.55810600 | 2.68818100  |
| H | -6.23033000 | -0.66592300 | 4.43197700  |
| H | -4.69361200 | -0.17944800 | 5.16010300  |
| H | -5.27535400 | -1.83593700 | 5.35316000  |
| C | -1.08184100 | 3.86855100  | 0.39387700  |
| C | -1.98915300 | 4.80586300  | -0.09192900 |
| C | -2.44479800 | 5.82620700  | 0.73780600  |
| C | -1.96997900 | 5.89305200  | 2.04590500  |
| C | -1.05471300 | 4.95109900  | 2.52336600  |
| C | -0.60324800 | 3.92303700  | 1.69892900  |
| C | -0.79575800 | 2.81892800  | -0.65369900 |
| C | -1.41844600 | 3.39029700  | -1.97715000 |
| C | -2.38850500 | 4.49698200  | -1.51150900 |
| H | -3.15808200 | 6.55857200  | 0.37120800  |
| H | -2.31436500 | 6.68562700  | 2.70268000  |
| H | -0.69892000 | 5.01652300  | 3.54626400  |
| H | 0.08723100  | 3.16936700  | 2.06724200  |
| H | -1.91974100 | 2.58314800  | -2.51038900 |
| H | -2.32786000 | 5.35809700  | -2.18415500 |
| H | -1.23510600 | 1.84616500  | -0.42116900 |
| H | -3.41779100 | 4.12329700  | -1.53905700 |
| C | 1.40842500  | 3.45553900  | -1.58272800 |
| C | 1.44087100  | 1.63105600  | -0.38756200 |
| N | 2.64643400  | 3.06122400  | -1.63417400 |
| N | 0.64347700  | 2.60831600  | -0.82673100 |
| N | 2.65332200  | 1.92502500  | -0.87242900 |
| C | 0.67071200  | 4.52380900  | -2.32311200 |
| H | 0.38178200  | 5.33822800  | -1.64474500 |
| H | 1.28799200  | 4.92124500  | -3.12841400 |
| C | 3.87195100  | 1.24596900  | -0.60318400 |
| C | 4.45527900  | 0.43286400  | -1.57577100 |

|    |             |             |             |
|----|-------------|-------------|-------------|
| C  | 4.50246800  | 1.40637500  | 0.63251900  |
| C  | 5.65586500  | -0.21747200 | -1.32641800 |
| C  | 5.70096100  | 0.75997600  | 0.90242800  |
| C  | 6.26118700  | -0.04212400 | -0.08613900 |
| H  | 6.10283000  | -0.85244200 | -2.08126300 |
| H  | 6.18475800  | 0.88290200  | 1.86341700  |
| Cl | 3.65897800  | 0.21122600  | -3.09399500 |
| Cl | 7.75729600  | -0.85240300 | 0.23746500  |
| Cl | 3.78086700  | 2.41149200  | 1.83898600  |
| O  | -0.44721000 | 3.87972200  | -2.89905100 |

TS6RS

|   |             |             |             |
|---|-------------|-------------|-------------|
| C | 1.11145000  | -0.01011700 | -0.92571900 |
| O | 1.49172300  | -1.31407000 | -0.92448900 |
| C | -0.07939300 | 0.44453000  | -1.35166600 |
| C | -1.16054700 | -0.44178200 | -1.89934700 |
| H | -0.33409600 | 1.49559900  | -1.25478300 |
| C | -1.26500300 | -0.22402500 | -3.41429400 |
| H | 0.72640800  | -1.88682800 | -0.67338900 |
| H | -0.91798800 | -1.48940100 | -1.71389600 |
| H | -0.30207400 | -0.42642800 | -3.89164200 |
| H | -2.00568100 | -0.89947200 | -3.84938500 |
| H | -1.55348000 | 0.80782700  | -3.64763400 |
| C | -2.80191600 | 1.53710800  | 0.71563500  |
| O | -2.33935800 | 2.58216900  | 0.27763900  |
| C | -2.21476300 | 0.21364200  | 0.32997200  |
| C | -2.48723100 | -0.10231400 | -1.14336400 |
| H | -2.83215900 | 0.84164200  | -1.59124100 |
| C | -4.07825300 | 1.55428500  | 1.50302300  |
| C | -4.63179300 | 0.37759900  | 2.01890600  |
| C | -4.73067100 | 2.77605900  | 1.70006900  |
| C | -5.82824600 | 0.42983000  | 2.72922900  |
| H | -4.11273600 | -0.56754800 | 1.88001100  |
| C | -5.92641700 | 2.82288900  | 2.40387800  |
| H | -4.28208200 | 3.67410900  | 1.28801400  |
| C | -6.47635200 | 1.64774400  | 2.91863900  |
| H | -6.25323200 | -0.48312900 | 3.13292100  |
| H | -6.43272800 | 3.77124300  | 2.55352200  |
| H | -7.41126100 | 1.68395600  | 3.46947300  |
| C | -3.56585600 | -1.13842600 | -1.41374100 |
| C | -4.31050000 | -1.09299000 | -2.59928200 |
| C | -3.81369800 | -2.17348700 | -0.51130600 |
| C | -5.24128800 | -2.08476200 | -2.89872100 |
| H | -4.16327300 | -0.26861500 | -3.29298600 |

|   |             |             |             |
|---|-------------|-------------|-------------|
| C | -4.75306500 | -3.16027800 | -0.80381200 |
| H | -3.27779500 | -2.21120900 | 0.43013500  |
| C | -5.45983900 | -3.13015900 | -2.00289700 |
| H | -5.80398100 | -2.03450500 | -3.82605000 |
| H | -4.92431400 | -3.95419200 | -0.08216000 |
| H | -6.18905400 | -3.90179200 | -2.23144100 |
| C | -1.32960300 | -0.49350100 | 1.08766800  |
| O | -0.79066400 | -1.61868600 | 0.66129600  |
| C | -0.69849800 | 0.08486300  | 2.32257000  |
| C | -1.34643200 | 0.82747600  | 3.31260300  |
| C | 0.69280900  | -0.07429500 | 2.42021900  |
| C | -0.61616400 | 1.43470000  | 4.33324500  |
| H | -2.42528500 | 0.92536500  | 3.30364600  |
| C | 1.42771000  | 0.55145800  | 3.42074100  |
| H | 1.17661600  | -0.70627100 | 1.68056900  |
| C | 0.77105300  | 1.32022600  | 4.38153200  |
| H | -1.13965900 | 2.00164700  | 5.09696100  |
| H | 2.51140800  | 0.45633500  | 3.44574600  |
| H | 1.33308500  | 1.81102500  | 5.16981300  |
| C | -1.34983200 | -3.07285700 | 1.75051700  |
| O | -2.36006400 | -2.72711300 | 2.32948200  |
| O | -1.62412600 | -4.01464500 | 0.65015600  |
| C | -1.06369400 | -4.11330200 | -0.54945500 |
| O | -0.02437800 | -3.60143800 | -0.92192800 |
| C | -1.88243200 | -4.99268500 | -1.47420600 |
| C | -2.07205400 | -4.32409300 | -2.83839900 |
| H | -1.34012300 | -5.93860900 | -1.59880900 |
| H | -2.84592300 | -5.21256200 | -1.00990900 |
| C | -2.91786900 | -5.18003400 | -3.77427800 |
| H | -1.08571900 | -4.12858500 | -3.27186000 |
| H | -2.55868400 | -3.35187500 | -2.69451700 |
| H | -3.04821400 | -4.69371800 | -4.74474100 |
| H | -3.91248800 | -5.34322700 | -3.34719100 |
| H | -2.45687300 | -6.15881400 | -3.94398000 |
| C | -0.07826600 | -3.37535900 | 2.51772800  |
| C | 1.22502100  | -3.61576800 | 1.77110800  |
| H | 0.03241700  | -2.53534400 | 3.21079200  |
| H | -0.32369200 | -4.25339200 | 3.13045600  |
| C | 2.40514700  | -3.62909100 | 2.73984300  |
| H | 1.35201200  | -2.83042400 | 1.02423100  |
| H | 1.18296400  | -4.55557400 | 1.21181400  |
| H | 3.35965900  | -3.74705400 | 2.21400400  |
| H | 2.32151300  | -4.44663600 | 3.46287100  |
| H | 2.43373400  | -2.69369400 | 3.31288500  |

|       |             |             |             |
|-------|-------------|-------------|-------------|
| C     | 4.78250000  | -1.34125100 | -0.41221500 |
| C     | 5.98976600  | -1.72147400 | 0.16707500  |
| C     | 7.03121300  | -2.18102000 | -0.63456400 |
| C     | 6.84051600  | -2.24630500 | -2.01233700 |
| C     | 5.62330400  | -1.86835000 | -2.58497700 |
| C     | 4.57766100  | -1.41406100 | -1.78650400 |
| C     | 3.80065100  | -0.87765900 | 0.63936200  |
| C     | 4.63763800  | -0.81927800 | 1.97304500  |
| C     | 5.94911100  | -1.57997300 | 1.66681300  |
| H     | 7.97718500  | -2.48078700 | -0.19347400 |
| H     | 7.64561800  | -2.59782200 | -2.64950400 |
| H     | 5.49026300  | -1.93542900 | -3.65955200 |
| H     | 3.61896300  | -1.14004700 | -2.21726900 |
| H     | 4.07385200  | -1.29672500 | 2.77462200  |
| H     | 6.80182000  | -1.03002500 | 2.07793500  |
| H     | 2.96190100  | -1.56241100 | 0.74305100  |
| H     | 5.93675500  | -2.56182600 | 2.15168000  |
| C     | 3.97336600  | 1.58032300  | 0.60889500  |
| C     | 2.15128000  | 0.85299900  | -0.37041500 |
| N     | 3.38967900  | 2.65525800  | 0.18434400  |
| N     | 3.25479000  | 0.45290100  | 0.30208500  |
| N     | 2.26678000  | 2.19154700  | -0.43830200 |
| C     | 5.20072400  | 1.42618400  | 1.44230600  |
| H     | 6.05007700  | 1.09133900  | 0.83042000  |
| H     | 5.44901500  | 2.37515400  | 1.91706400  |
| C     | 1.35045800  | 3.13547100  | -0.97336500 |
| C     | 1.34261200  | 3.41760200  | -2.33997900 |
| C     | 0.45041000  | 3.77587500  | -0.11989900 |
| C     | 0.43824400  | 4.32857200  | -2.86373600 |
| C     | -0.46322000 | 4.69088800  | -0.62891900 |
| C     | -0.45228700 | 4.95224700  | -1.99257200 |
| H     | 0.42532500  | 4.54400300  | -3.92486100 |
| H     | -1.18940100 | 5.15408200  | 0.02654300  |
| Cl    | 2.44081700  | 2.58830100  | -3.39094600 |
| Cl    | -1.59363400 | 6.08443900  | -2.64075200 |
| Cl    | 0.44623500  | 3.38381600  | 1.55590600  |
| O     | 4.87559000  | 0.49478200  | 2.45219000  |
| TS6SR |             |             |             |
| C     | 0.74420400  | 0.73427300  | -1.17522400 |
| O     | 1.46604300  | -0.21502700 | -1.82757200 |
| C     | -0.54932200 | 1.03051200  | -1.36017800 |
| C     | -1.50160000 | 0.29683400  | -2.26329100 |
| H     | -1.01081200 | 1.74599600  | -0.68750900 |

|   |             |             |             |
|---|-------------|-------------|-------------|
| C | -0.98039500 | 0.00648900  | -3.67358800 |
| H | 0.99558000  | -1.07763100 | -1.81491500 |
| H | -2.38139800 | 0.94417000  | -2.34611600 |
| H | -0.19333400 | -0.75122800 | -3.66782900 |
| H | -1.80209600 | -0.37208700 | -4.28706200 |
| H | -0.58553200 | 0.91197100  | -4.14268000 |
| C | -3.30045900 | 0.06360700  | 0.30141000  |
| O | -3.28646500 | 1.28399400  | 0.20665300  |
| C | -2.09202900 | -0.75301900 | -0.04273300 |
| C | -1.92893000 | -1.02247300 | -1.53958900 |
| H | -1.10630700 | -1.73662600 | -1.62223600 |
| C | -4.56897100 | -0.66024700 | 0.63752700  |
| C | -4.60559100 | -2.05809900 | 0.67985600  |
| C | -5.73019100 | 0.08065100  | 0.87164300  |
| C | -5.80820900 | -2.70657100 | 0.94252100  |
| H | -3.69690500 | -2.62325600 | 0.48081200  |
| C | -6.92640900 | -0.57097700 | 1.14231200  |
| H | -5.67090300 | 1.16350400  | 0.82803800  |
| C | -6.96536400 | -1.96555300 | 1.17327600  |
| H | -5.84289200 | -3.79081400 | 0.96142400  |
| H | -7.83053700 | 0.00134200  | 1.32457800  |
| H | -7.90239700 | -2.47516000 | 1.37629400  |
| C | -3.14157100 | -1.64576800 | -2.21297900 |
| C | -3.11819400 | -3.00569600 | -2.53377200 |
| C | -4.29470800 | -0.90858300 | -2.50575700 |
| C | -4.22773500 | -3.61616800 | -3.11420100 |
| H | -2.22836000 | -3.57635700 | -2.28837400 |
| C | -5.40524300 | -1.51865500 | -3.08119300 |
| H | -4.34554700 | 0.14925800  | -2.25721000 |
| C | -5.37589200 | -2.87731100 | -3.38619200 |
| H | -4.19440000 | -4.67524300 | -3.35215000 |
| H | -6.29540100 | -0.93237200 | -3.28808400 |
| H | -6.24155800 | -3.35462000 | -3.83520000 |
| C | -1.07450900 | -1.00333400 | 0.82137000  |
| O | 0.03452100  | -1.64002900 | 0.44446700  |
| C | -1.05145800 | -0.49424600 | 2.23294900  |
| C | -2.18195800 | -0.34462100 | 3.04349700  |
| C | 0.19014900  | -0.12690600 | 2.76863800  |
| C | -2.07343900 | 0.19470800  | 4.32382100  |
| H | -3.15424600 | -0.67077900 | 2.69067100  |
| C | 0.30511900  | 0.41155100  | 4.04421400  |
| H | 1.07610500  | -0.28742000 | 2.16766000  |
| C | -0.83412800 | 0.58511300  | 4.82772800  |
| H | -2.96476700 | 0.29636700  | 4.93534800  |

|   |             |             |             |
|---|-------------|-------------|-------------|
| H | 1.28681600  | 0.68447100  | 4.42076500  |
| H | -0.75631100 | 1.00245900  | 5.82666200  |
| C | -0.23528100 | -3.42427300 | 0.42867400  |
| O | -1.13861900 | -3.72381900 | -0.33165400 |
| O | 1.16600000  | -3.70067900 | 0.02308100  |
| C | 1.58532500  | -3.38437300 | -1.18925800 |
| O | 0.92520900  | -2.84392500 | -2.06087100 |
| C | 3.05013700  | -3.72471200 | -1.37920400 |
| C | 3.60464700  | -3.20564400 | -2.69886100 |
| H | 3.60217500  | -3.29438300 | -0.53098600 |
| H | 3.16630000  | -4.81125900 | -1.28632600 |
| C | 5.11326200  | -3.40111500 | -2.79021600 |
| H | 3.35637400  | -2.14226300 | -2.78729100 |
| H | 3.09481500  | -3.70822000 | -3.52669400 |
| H | 5.51090400  | -2.99816900 | -3.72544200 |
| H | 5.37868600  | -4.46234000 | -2.74001900 |
| H | 5.61842600  | -2.88694400 | -1.96535500 |
| C | -0.33879800 | -3.73675000 | 1.91350900  |
| C | 0.85641400  | -3.38510400 | 2.78772300  |
| H | -1.23462500 | -3.20704700 | 2.25904400  |
| H | -0.56932600 | -4.80695600 | 1.98020000  |
| C | 0.48454000  | -3.31619900 | 4.26607300  |
| H | 1.22427500  | -2.41225200 | 2.45785700  |
| H | 1.66194300  | -4.11038600 | 2.62454700  |
| H | 1.34920800  | -3.06170400 | 4.88618200  |
| H | 0.08540700  | -4.27274600 | 4.61960700  |
| H | -0.28158600 | -2.54939800 | 4.42797900  |
| C | 4.42936900  | -0.41977800 | -0.38215000 |
| C | 5.53504800  | -0.91133000 | 0.30905300  |
| C | 6.79452100  | -0.90404500 | -0.28585300 |
| C | 6.92663900  | -0.39805100 | -1.57612300 |
| C | 5.81416400  | 0.08810100  | -2.26741900 |
| C | 4.55379000  | 0.08318700  | -1.67615700 |
| C | 3.18178000  | -0.48056900 | 0.47637800  |
| C | 3.70006400  | -0.93362200 | 1.89838000  |
| C | 5.15717200  | -1.40131700 | 1.68090100  |
| H | 7.65975400  | -1.28126400 | 0.25118400  |
| H | 7.90258300  | -0.38205000 | -2.05069700 |
| H | 5.93290400  | 0.47451100  | -3.27424800 |
| H | 3.68246800  | 0.45032900  | -2.20982200 |
| H | 3.06954600  | -1.74207700 | 2.26708900  |
| H | 5.79882800  | -1.00639900 | 2.47524700  |
| H | 2.41253300  | -1.17122900 | 0.12227000  |
| H | 5.21489800  | -2.49335400 | 1.73747600  |



|    |             |            |             |
|----|-------------|------------|-------------|
| C  | 2.95393900  | 1.77892000 | 1.47731000  |
| C  | 1.50621600  | 1.37813000 | -0.11245400 |
| N  | 2.24415300  | 2.86237300 | 1.41329600  |
| N  | 2.54172700  | 0.84527700 | 0.56168500  |
| N  | 1.35427300  | 2.60770700 | 0.40772300  |
| C  | 3.98840700  | 1.35910600 | 2.46602800  |
| H  | 4.98993900  | 1.35918300 | 2.01361900  |
| H  | 3.97806500  | 2.02694500 | 3.32692300  |
| C  | 0.47040000  | 3.63633500 | -0.01775100 |
| C  | 0.75309900  | 4.35948000 | -1.17773300 |
| C  | -0.67238200 | 3.93735400 | 0.72895400  |
| C  | -0.09614400 | 5.36928900 | -1.60654000 |
| C  | -1.53155300 | 4.94741400 | 0.31377600  |
| C  | -1.22897000 | 5.64762200 | -0.84848800 |
| H  | 0.12331700  | 5.92566900 | -2.50905900 |
| H  | -2.42400500 | 5.17193900 | 0.88434300  |
| Cl | 2.17031400  | 3.98970100 | -2.09916300 |
| Cl | -2.29840700 | 6.90703800 | -1.37378000 |
| Cl | -1.03259600 | 3.02452200 | 2.14284700  |
| O  | 3.60058700  | 0.07018400 | 2.89820900  |

TS6SS

|   |             |             |             |
|---|-------------|-------------|-------------|
| C | 1.00959900  | -0.01987700 | -0.92904800 |
| O | 1.34473600  | -1.33617200 | -0.92122500 |
| C | -0.13013100 | 0.52847800  | -1.38945600 |
| C | -1.27472500 | -0.14686900 | -2.09610600 |
| H | -0.29329500 | 1.58320500  | -1.19335700 |
| C | -0.94257800 | -1.50887800 | -2.69857600 |
| H | 0.58431200  | -1.89416300 | -0.62884900 |
| H | -1.48769400 | 0.52822300  | -2.93699300 |
| H | -1.68159300 | -1.77382300 | -3.45703200 |
| H | 0.04266100  | -1.48505500 | -3.17224400 |
| H | -0.94731600 | -2.29314000 | -1.94509400 |
| C | -2.68104900 | 1.65875200  | 0.56632200  |
| O | -2.02000400 | 2.63137800  | 0.23431100  |
| C | -2.23024800 | 0.25730500  | 0.26299100  |
| C | -2.58509400 | -0.09897300 | -1.17961200 |
| H | -3.13737600 | 0.77261300  | -1.55357400 |
| C | -4.05550900 | 1.82664200  | 1.13299600  |
| C | -4.74492700 | 0.74275800  | 1.68697100  |
| C | -4.64897000 | 3.09250800  | 1.09786000  |
| C | -6.02426000 | 0.93250800  | 2.20347900  |
| H | -4.26619100 | -0.23312000 | 1.73362000  |
| C | -5.92840700 | 3.27393000  | 1.60460100  |

|   |             |             |             |
|---|-------------|-------------|-------------|
| H | -4.09026600 | 3.91568400  | 0.66389900  |
| C | -6.61589800 | 2.19207200  | 2.15759600  |
| H | -6.55689100 | 0.09512600  | 2.64165100  |
| H | -6.39389800 | 4.25379400  | 1.57092800  |
| H | -7.61558900 | 2.33427100  | 2.55641300  |
| C | -3.52728000 | -1.26934000 | -1.41741800 |
| C | -4.12980700 | -1.39183100 | -2.67799900 |
| C | -3.84750300 | -2.20054800 | -0.43252800 |
| C | -5.00598200 | -2.43403000 | -2.95784200 |
| H | -3.90811700 | -0.65587200 | -3.44950800 |
| C | -4.73069800 | -3.24604600 | -0.71140500 |
| H | -3.42078800 | -2.12283600 | 0.56233700  |
| C | -5.30945300 | -3.37135300 | -1.96932600 |
| H | -5.45865400 | -2.51112900 | -3.94181000 |
| H | -4.95785800 | -3.96181500 | 0.07349500  |
| H | -5.99606800 | -4.18540400 | -2.18176200 |
| C | -1.39445000 | -0.43113000 | 1.06527700  |
| O | -0.92316000 | -1.64581600 | 0.71757800  |
| C | -0.75277000 | 0.18389400  | 2.26540500  |
| C | -1.41416900 | 0.97511000  | 3.20567800  |
| C | 0.63158900  | 0.00389400  | 2.39873900  |
| C | -0.69967000 | 1.60545800  | 4.22266400  |
| H | -2.49237000 | 1.08501400  | 3.15777800  |
| C | 1.35069100  | 0.64346100  | 3.40205100  |
| H | 1.12633400  | -0.66526100 | 1.69981100  |
| C | 0.68238300  | 1.45632000  | 4.31763100  |
| H | -1.23038400 | 2.21144400  | 4.95031800  |
| H | 2.42968200  | 0.51661500  | 3.46470800  |
| H | 1.23186800  | 1.95684400  | 5.10858600  |
| C | -1.40887500 | -2.75763700 | 1.82987900  |
| O | -2.43451900 | -2.38916800 | 2.41145300  |
| O | -1.72476500 | -3.92183100 | 0.88310500  |
| C | -1.09997500 | -4.25194100 | -0.22332700 |
| O | -0.04344300 | -3.79241500 | -0.63727200 |
| C | -1.85210000 | -5.31185700 | -1.00856500 |
| C | -2.07288600 | -4.86175900 | -2.45466700 |
| H | -1.25350200 | -6.23098600 | -0.99488800 |
| H | -2.80606000 | -5.51668300 | -0.51663100 |
| C | -2.87232000 | -5.88441800 | -3.25357800 |
| H | -1.09699500 | -4.68014100 | -2.91785500 |
| H | -2.60860700 | -3.90539800 | -2.45107800 |
| H | -3.02864300 | -5.54832800 | -4.28238000 |
| H | -3.85680400 | -6.04021400 | -2.80031200 |
| H | -2.36087400 | -6.85225200 | -3.28704200 |

|    |             |             |             |
|----|-------------|-------------|-------------|
| C  | -0.20521900 | -3.13929100 | 2.68768500  |
| C  | 1.12135600  | -3.50394700 | 2.03610500  |
| H  | -0.06690200 | -2.29529300 | 3.37147200  |
| H  | -0.56024800 | -3.97496400 | 3.30297900  |
| C  | 2.24520200  | -3.51815900 | 3.06878000  |
| H  | 1.33491400  | -2.79068800 | 1.23485000  |
| H  | 1.05336300  | -4.47744900 | 1.54256100  |
| H  | 3.21659200  | -3.74291400 | 2.61330500  |
| H  | 2.06131800  | -4.27143300 | 3.84148200  |
| H  | 2.31089300  | -2.54781800 | 3.57713400  |
| C  | 4.67909400  | -1.42326200 | -0.51010500 |
| C  | 5.88109000  | -1.85565100 | 0.04297400  |
| C  | 6.90822800  | -2.29638900 | -0.78698300 |
| C  | 6.70829300  | -2.29043800 | -2.16527100 |
| C  | 5.49663800  | -1.85928100 | -2.71140600 |
| C  | 4.46535000  | -1.42299100 | -1.88448400 |
| C  | 3.71440600  | -0.98975800 | 0.56927400  |
| C  | 4.56656400  | -0.98928700 | 1.89356300  |
| C  | 5.84809500  | -1.78365500 | 1.54830700  |
| H  | 7.85049700  | -2.63650900 | -0.36799700 |
| H  | 7.50235300  | -2.62709000 | -2.82392400 |
| H  | 5.35704600  | -1.86955500 | -3.78710500 |
| H  | 3.51256600  | -1.10259600 | -2.29670800 |
| H  | 3.99897700  | -1.46626900 | 2.69175600  |
| H  | 6.72130000  | -1.28781000 | 1.98388000  |
| H  | 2.87074500  | -1.66948600 | 0.65715900  |
| H  | 5.79624100  | -2.78698700 | 1.98432400  |
| C  | 3.94784400  | 1.45503600  | 0.59608400  |
| C  | 2.08215500  | 0.80672100  | -0.36153900 |
| N  | 3.39479400  | 2.55530100  | 0.19977400  |
| N  | 3.18474000  | 0.35913500  | 0.28337400  |
| N  | 2.24536400  | 2.14323800  | -0.40998200 |
| C  | 5.18533000  | 1.24971300  | 1.40265900  |
| H  | 6.01491100  | 0.90762800  | 0.76852800  |
| H  | 5.46643900  | 2.18169100  | 1.89270200  |
| C  | 1.39387600  | 3.15330300  | -0.93566200 |
| C  | 1.40094600  | 3.44387100  | -2.30110100 |
| C  | 0.58936900  | 3.89090800  | -0.06645600 |
| C  | 0.59392900  | 4.44942900  | -2.80955800 |
| C  | -0.22214600 | 4.90542700  | -0.55949900 |
| C  | -0.20696000 | 5.16573200  | -1.92277000 |
| H  | 0.59073300  | 4.67071400  | -3.86949500 |
| H  | -0.86896500 | 5.45782400  | 0.11010500  |
| Cl | 2.40411400  | 2.51820300  | -3.36553600 |

|    |             |            |             |
|----|-------------|------------|-------------|
| Cl | -1.22793000 | 6.42090400 | -2.55118500 |
| Cl | 0.57985900  | 3.50826300 | 1.61047800  |
| O  | 4.85282600  | 0.30589800 | 2.39781500  |

M6RR

|   |             |             |             |
|---|-------------|-------------|-------------|
| C | -1.33798500 | -0.11010300 | -0.74516500 |
| O | -1.94666000 | 0.64864700  | -1.57831000 |
| C | -0.02196800 | -0.46097600 | -0.66700000 |
| C | 0.92984700  | -0.03746600 | -1.74287500 |
| H | 0.33187000  | -1.11333200 | 0.12102200  |
| C | 0.92151200  | -1.07815100 | -2.87560300 |
| H | 0.53659700  | 0.88155900  | -2.18175700 |
| H | -0.08594100 | -1.11622200 | -3.29831200 |
| H | 1.62650000  | -0.81695500 | -3.67421800 |
| H | 1.17856700  | -2.07507400 | -2.50401700 |
| C | 3.82045200  | 1.07760500  | 0.68733400  |
| O | 3.83724900  | 0.82554300  | 1.87472800  |
| C | 2.53816000  | 1.23587500  | -0.09560900 |
| C | 2.38028200  | 0.24295100  | -1.25226500 |
| H | 2.90063400  | 0.68833300  | -2.11297100 |
| C | 5.08753500  | 1.20673900  | -0.10102700 |
| C | 5.13876900  | 1.99452200  | -1.25489400 |
| C | 6.22817000  | 0.53577000  | 0.34416800  |
| C | 6.33309300  | 2.10630000  | -1.96149000 |
| H | 4.24944200  | 2.53158700  | -1.58122500 |
| C | 7.41279500  | 0.63496400  | -0.37446300 |
| H | 6.15886800  | -0.06691400 | 1.24436600  |
| C | 7.46481400  | 1.42037700  | -1.52664400 |
| H | 6.37861000  | 2.72640300  | -2.85070400 |
| H | 8.29748300  | 0.10207100  | -0.04105200 |
| H | 8.39246600  | 1.49858700  | -2.08511400 |
| C | 3.11168800  | -1.05717900 | -0.94135600 |
| C | 3.97601200  | -1.61331500 | -1.88863800 |
| C | 2.93627600  | -1.72851200 | 0.27370300  |
| C | 4.63477600  | -2.81398900 | -1.64358600 |
| H | 4.14159300  | -1.08760200 | -2.82591300 |
| C | 3.60109100  | -2.92644700 | 0.52498000  |
| H | 2.31179100  | -1.28665400 | 1.04724200  |
| C | 4.44584700  | -3.47791400 | -0.43419400 |
| H | 5.30427500  | -3.22500500 | -2.39263800 |
| H | 3.47014900  | -3.42516600 | 1.48089200  |
| H | 4.96161600  | -4.41174600 | -0.23403600 |
| C | 1.74225800  | 2.26313100  | 0.22160100  |
| O | 0.53859100  | 2.47389500  | -0.44422200 |

|   |             |             |             |
|---|-------------|-------------|-------------|
| C | 1.97249500  | 3.29687600  | 1.26299100  |
| C | 3.20723900  | 3.93103400  | 1.41990000  |
| C | 0.89625500  | 3.69084500  | 2.06547900  |
| C | 3.37114000  | 4.91844900  | 2.38577900  |
| H | 4.03767500  | 3.66463300  | 0.77287100  |
| C | 1.06294600  | 4.67481800  | 3.03319800  |
| H | -0.06907300 | 3.21375500  | 1.92679900  |
| C | 2.30243400  | 5.28938000  | 3.19768100  |
| H | 4.33447000  | 5.40555000  | 2.49629600  |
| H | 0.22416500  | 4.96367500  | 3.65848200  |
| H | 2.43268900  | 6.06044800  | 3.95016900  |
| C | 0.59847600  | 3.25499600  | -1.56026000 |
| O | 1.64051400  | 3.65806300  | -2.01313300 |
| C | -0.77296700 | 3.45501600  | -2.14061000 |
| C | -1.83528600 | 3.83530100  | -1.10719700 |
| H | -0.68969500 | 4.19641200  | -2.93852300 |
| H | -1.06620200 | 2.48530200  | -2.56423900 |
| C | -3.23098500 | 3.78420800  | -1.72089100 |
| H | -1.62653900 | 4.83030000  | -0.69677100 |
| H | -1.76325200 | 3.12404200  | -0.27877400 |
| H | -4.00499300 | 4.02729500  | -0.98415900 |
| H | -3.42545300 | 2.77821000  | -2.10853900 |
| H | -3.32679000 | 4.49483900  | -2.54765400 |
| C | -5.12581100 | 0.78274300  | -0.76448900 |
| C | -6.35904100 | 1.31159100  | -0.39505200 |
| C | -7.45953300 | 1.16208400  | -1.23481600 |
| C | -7.29722500 | 0.48010700  | -2.43835200 |
| C | -6.05129100 | -0.03512700 | -2.80648500 |
| C | -4.94627100 | 0.11450800  | -1.97269600 |
| C | -4.07918400 | 1.06066900  | 0.29088600  |
| C | -4.88494100 | 1.66194000  | 1.50128300  |
| C | -6.27402900 | 2.02841000  | 0.92826700  |
| H | -8.42743800 | 1.56863100  | -0.95649400 |
| H | -8.14695300 | 0.35285900  | -3.10178400 |
| H | -5.94339300 | -0.54954400 | -3.75592100 |
| H | -3.95425700 | -0.23676000 | -2.24488600 |
| H | -4.36451300 | 2.53573900  | 1.89587300  |
| H | -7.05571900 | 1.73725300  | 1.63723800  |
| H | -3.30783000 | 1.73342400  | -0.08093800 |
| H | -6.35368500 | 3.11178900  | 0.78861600  |
| C | -3.97137500 | -1.03510100 | 1.59589400  |
| C | -2.23159400 | -0.70721500 | 0.29694100  |
| N | -3.24142300 | -2.09110900 | 1.77914200  |
| N | -3.39621900 | -0.17113700 | 0.70363400  |

|    |             |             |             |
|----|-------------|-------------|-------------|
| N  | -2.16642000 | -1.88091500 | 0.95324400  |
| C  | -5.21314200 | -0.56991300 | 2.28141900  |
| H  | -6.08938800 | -0.69177500 | 1.62959300  |
| H  | -5.36908000 | -1.12700300 | 3.20493600  |
| C  | -1.18609000 | -2.89891100 | 0.82651200  |
| C  | -0.28947600 | -3.13978000 | 1.86837800  |
| C  | -1.11272600 | -3.67439300 | -0.33332600 |
| C  | 0.66567600  | -4.14259400 | 1.76586400  |
| C  | -0.14732100 | -4.66302300 | -0.46507200 |
| C  | 0.72780200  | -4.88456800 | 0.59273800  |
| H  | 1.35293900  | -4.32809600 | 2.58215900  |
| H  | -0.08681300 | -5.25128500 | -1.37221000 |
| Cl | -0.33283300 | -2.15259500 | 3.28532200  |
| Cl | 1.93168100  | -6.12229700 | 0.44674200  |
| Cl | -2.22211700 | -3.39635700 | -1.62889200 |
| O  | -4.98456300 | 0.78517700  | 2.61651100  |

M6RS

|   |             |             |             |
|---|-------------|-------------|-------------|
| C | 1.21042200  | -0.01150700 | -1.24828200 |
| O | 1.86828900  | -0.99737800 | -1.73081400 |
| C | -0.08709800 | 0.35839900  | -1.46854100 |
| C | -0.96649500 | -0.53742400 | -2.29314800 |
| H | -0.53459500 | 1.20762900  | -0.96261700 |
| C | -1.08647800 | -0.08012700 | -3.75210200 |
| H | -0.46618400 | -1.51011900 | -2.28845200 |
| H | -0.09973800 | -0.07702800 | -4.22154900 |
| H | -1.74252400 | -0.74771800 | -4.32237000 |
| H | -1.49564500 | 0.93465700  | -3.80705000 |
| C | -3.17506600 | 0.63225700  | 0.35456900  |
| O | -2.77786400 | 1.77447000  | 0.20792900  |
| C | -2.36420000 | -0.52914800 | -0.15039500 |
| C | -2.38934700 | -0.67355000 | -1.67416900 |
| H | -2.96021400 | 0.19273400  | -2.03586500 |
| C | -4.54150300 | 0.34809000  | 0.89168800  |
| C | -5.00075300 | -0.96199900 | 1.07006000  |
| C | -5.37229500 | 1.42971200  | 1.20374800  |
| C | -6.28630200 | -1.18224100 | 1.55697900  |
| H | -4.35083300 | -1.80100400 | 0.83603900  |
| C | -6.65280900 | 1.20490000  | 1.68965600  |
| H | -4.99040400 | 2.43429000  | 1.05467200  |
| C | -7.11003400 | -0.10236300 | 1.86499300  |
| H | -6.64252600 | -2.19737500 | 1.69620600  |
| H | -7.29755000 | 2.04327300  | 1.93223300  |
| H | -8.11171500 | -0.27740600 | 2.24516000  |

|   |             |             |             |
|---|-------------|-------------|-------------|
| C | -3.16916400 | -1.91022100 | -2.10233000 |
| C | -4.56562100 | -1.84102000 | -2.15715200 |
| C | -2.55604100 | -3.12759000 | -2.40622200 |
| C | -5.32934700 | -2.95697900 | -2.48331600 |
| H | -5.05868200 | -0.89751000 | -1.93346700 |
| C | -3.31692100 | -4.24707900 | -2.73706000 |
| H | -1.47369300 | -3.20211700 | -2.39609900 |
| C | -4.70578100 | -4.16847500 | -2.77210400 |
| H | -6.41155200 | -2.87782000 | -2.51678600 |
| H | -2.81850000 | -5.18318000 | -2.97092700 |
| H | -5.29695900 | -5.04139800 | -3.02936500 |
| C | -1.55349300 | -1.23728600 | 0.63696100  |
| O | -0.79592200 | -2.24511100 | 0.04093500  |
| C | -1.12146600 | -0.91221500 | 2.01619200  |
| C | -1.98268800 | -0.47879600 | 3.02533500  |
| C | 0.25806000  | -0.95209500 | 2.26659300  |
| C | -1.46714400 | -0.06502900 | 4.25146500  |
| H | -3.05485400 | -0.47585800 | 2.86401600  |
| C | 0.77175200  | -0.53005300 | 3.48723600  |
| H | 0.91997300  | -1.30263500 | 1.47822300  |
| C | -0.09385600 | -0.07887200 | 4.48316600  |
| H | -2.14628500 | 0.26587400  | 5.03073800  |
| H | 1.84589100  | -0.54080900 | 3.65207200  |
| H | 0.29981000  | 0.25380100  | 5.43825800  |
| C | -1.05327800 | -3.50991800 | 0.47993600  |
| O | -1.96362300 | -3.76880000 | 1.22230000  |
| C | -0.06041500 | -4.49195500 | -0.08998500 |
| C | 1.36598100  | -3.94163000 | -0.15522700 |
| H | -0.12531500 | -5.39661300 | 0.52045900  |
| H | -0.40369300 | -4.75893700 | -1.09802300 |
| C | 2.35885600  | -4.97877300 | -0.67005800 |
| H | 1.65913200  | -3.61826100 | 0.85424900  |
| H | 1.38062100  | -3.05151300 | -0.79578600 |
| H | 3.36861000  | -4.56105300 | -0.71946400 |
| H | 2.08882800  | -5.30562500 | -1.67885400 |
| H | 2.38655000  | -5.86366500 | -0.02630400 |
| C | 4.87078900  | -0.99221500 | -0.41903400 |
| C | 5.98766300  | -1.47287000 | 0.25740100  |
| C | 7.22779500  | -1.49283300 | -0.37535500 |
| C | 7.31997100  | -1.02625900 | -1.68461600 |
| C | 6.18870700  | -0.55967500 | -2.36000300 |
| C | 4.94546000  | -0.54298000 | -1.73390000 |
| C | 3.63861800  | -1.05194700 | 0.45352300  |
| C | 4.17446600  | -1.46637100 | 1.87320900  |

|    |             |             |             |
|----|-------------|-------------|-------------|
| C  | 5.62689800  | -1.94817700 | 1.64167600  |
| H  | 8.10809700  | -1.86330300 | 0.14180700  |
| H  | 8.28116700  | -1.03067700 | -2.18907500 |
| H  | 6.28030300  | -0.21418300 | -3.38462200 |
| H  | 4.03825800  | -0.22640600 | -2.24159000 |
| H  | 3.54482600  | -2.25518900 | 2.29022500  |
| H  | 6.27817300  | -1.55027700 | 2.42656500  |
| H  | 2.90598900  | -1.75481900 | 0.05843100  |
| H  | 5.67949200  | -3.04010000 | 1.70425700  |
| C  | 3.40543000  | 1.23012400  | 1.37596300  |
| C  | 1.95345900  | 0.76656200  | -0.20639800 |
| N  | 2.72734500  | 2.32639500  | 1.24270000  |
| N  | 2.97137900  | 0.25653800  | 0.51768100  |
| N  | 1.83561800  | 2.02815600  | 0.24499700  |
| C  | 4.46018500  | 0.85383000  | 2.36127000  |
| H  | 5.45313200  | 0.85414000  | 1.89016500  |
| H  | 4.45865200  | 1.54664300  | 3.20231000  |
| C  | 0.93257700  | 3.02803000  | -0.19626500 |
| C  | -0.16167800 | 3.37714900  | 0.59704000  |
| C  | 1.13107200  | 3.66760000  | -1.42140800 |
| C  | -1.06406700 | 4.34169200  | 0.16690600  |
| C  | 0.24125500  | 4.63365300  | -1.86663000 |
| C  | -0.84741000 | 4.95283400  | -1.06079600 |
| H  | -1.92999900 | 4.58411600  | 0.76932300  |
| H  | 0.39298300  | 5.12272600  | -2.82053700 |
| Cl | -0.41100300 | 2.57748400  | 2.10403600  |
| Cl | -1.97493100 | 6.15210100  | -1.61469700 |
| Cl | 2.49380000  | 3.24939400  | -2.40112200 |
| O  | 4.11097400  | -0.42924800 | 2.84585500  |

M6SR

|   |             |             |             |
|---|-------------|-------------|-------------|
| C | -1.34675600 | 0.21795900  | -1.34853000 |
| O | -1.81803200 | -0.91134500 | -1.71095100 |
| C | -0.09326000 | 0.74260200  | -1.49368500 |
| C | 1.00324600  | 0.02465300  | -2.21881600 |
| H | 0.12483700  | 1.75713900  | -1.17926100 |
| C | 1.25567300  | 0.69889700  | -3.57725300 |
| H | 0.67935300  | -1.00237800 | -2.40052700 |
| H | 0.32355000  | 0.73134600  | -4.14615600 |
| H | 2.00776400  | 0.16586600  | -4.16550400 |
| H | 1.60260300  | 1.73045000  | -3.43807000 |
| C | 3.19579500  | 0.20034000  | 0.96326300  |
| O | 2.79113200  | 1.06365700  | 1.71961900  |
| C | 2.25209600  | -0.52883300 | 0.03722400  |



|   |             |             |             |
|---|-------------|-------------|-------------|
| C | 2.32139700  | 0.03010400  | -1.39048400 |
| H | 2.56279500  | 1.09753000  | -1.25909400 |
| C | 4.65857000  | -0.08048400 | 0.82631300  |
| C | 5.11906700  | -1.31312000 | 0.35260800  |
| C | 5.56816500  | 0.92145400  | 1.17232800  |
| C | 6.48415200  | -1.53439500 | 0.21108400  |
| H | 4.40468900  | -2.08943400 | 0.09129900  |
| C | 6.93159900  | 0.70315100  | 1.01497500  |
| H | 5.18597600  | 1.86549400  | 1.54796100  |
| C | 7.38789000  | -0.52311200 | 0.53140800  |
| H | 6.83993100  | -2.48927800 | -0.16110300 |
| H | 7.64022700  | 1.48580800  | 1.26600100  |
| H | 8.45309400  | -0.69096400 | 0.40572900  |
| C | 3.48400400  | -0.57914800 | -2.16142200 |
| C | 4.54790300  | 0.21748100  | -2.58635700 |
| C | 3.51223900  | -1.94639700 | -2.44635600 |
| C | 5.62958000  | -0.33818300 | -3.26490800 |
| H | 4.53703800  | 1.28177000  | -2.36353000 |
| C | 4.59038500  | -2.50549900 | -3.12502100 |
| H | 2.70663200  | -2.58717600 | -2.09939500 |
| C | 5.65539100  | -1.70386200 | -3.53301200 |
| H | 6.45475200  | 0.29488000  | -3.57593600 |
| H | 4.60200900  | -3.57177600 | -3.32865200 |
| H | 6.49946200  | -2.14287800 | -4.05557600 |
| C | 1.44711600  | -1.48650900 | 0.51295300  |
| O | 0.47397500  | -2.02453300 | -0.31614600 |
| C | 1.35872400  | -1.98054000 | 1.91020800  |
| C | 2.47362300  | -2.10891600 | 2.74237000  |
| C | 0.09925300  | -2.33786900 | 2.41065600  |
| C | 2.32882100  | -2.55328300 | 4.05254800  |
| H | 3.46599100  | -1.88740400 | 2.36539400  |
| C | -0.04297400 | -2.78049000 | 3.72069100  |
| H | -0.76812200 | -2.26401900 | 1.76080800  |
| C | 1.07182900  | -2.88608400 | 4.54884300  |
| H | 3.20693000  | -2.65076000 | 4.68269500  |
| H | -1.02620900 | -3.04798300 | 4.09520700  |
| H | 0.96290500  | -3.23619900 | 5.57015800  |
| C | -4.75754800 | -1.20950900 | -0.03992800 |
| C | -6.08358200 | -1.62972100 | -0.08344200 |
| C | -6.55595400 | -2.52390700 | 0.87217400  |
| C | -5.68559100 | -2.96401000 | 1.86986300  |
| C | -4.36704100 | -2.50556100 | 1.92580300  |
| C | -3.89134000 | -1.61435100 | 0.96631700  |
| C | -4.45722900 | -0.28128000 | -1.19082400 |

|    |             |             |             |
|----|-------------|-------------|-------------|
| C  | -5.86397200 | 0.15312900  | -1.70827600 |
| C  | -6.80822300 | -0.97872400 | -1.23790400 |
| H  | -7.58688800 | -2.86457500 | 0.85213400  |
| H  | -6.04297200 | -3.65893800 | 2.62300800  |
| H  | -3.71103600 | -2.84526400 | 2.72109900  |
| H  | -2.87085700 | -1.23776600 | 0.99317900  |
| H  | -5.86090900 | 0.25441300  | -2.79433500 |
| H  | -7.78365300 | -0.56473300 | -0.96647700 |
| H  | -3.85204700 | -0.77059100 | -1.95388700 |
| H  | -6.96959100 | -1.69456200 | -2.05157300 |
| C  | -4.32535500 | 1.85477800  | -0.00877600 |
| C  | -2.36319900 | 1.11667700  | -0.68744100 |
| N  | -3.48502900 | 2.72034100  | 0.46356800  |
| N  | -3.68993200 | 0.87398700  | -0.71969100 |
| N  | -2.26760200 | 2.24605800  | 0.04507700  |
| C  | -5.81833400 | 1.80092200  | 0.04776000  |
| H  | -6.14392200 | 1.08968800  | 0.81923400  |
| H  | -6.22173100 | 2.78752900  | 0.27613600  |
| C  | -1.11044700 | 2.97862000  | 0.41694800  |
| C  | -0.82813200 | 4.18754400  | -0.22152800 |
| C  | -0.26261700 | 2.51909700  | 1.42728400  |
| C  | 0.28296900  | 4.93841600  | 0.13615900  |
| C  | 0.85829000  | 3.25244000  | 1.79539700  |
| C  | 1.10983500  | 4.45320600  | 1.14313100  |
| H  | 0.49941400  | 5.87330700  | -0.36550500 |
| H  | 1.53261000  | 2.87000900  | 2.54953400  |
| Cl | -1.84968800 | 4.73875600  | -1.50560300 |
| Cl | 2.51247400  | 5.37223900  | 1.59090000  |
| Cl | -0.57456100 | 1.00850000  | 2.19955300  |
| O  | -6.27392300 | 1.43438100  | -1.23981100 |
| C  | 0.61069700  | -3.32552700 | -0.69660600 |
| O  | 1.58832600  | -3.97967800 | -0.43074400 |
| C  | -0.59805700 | -3.76381400 | -1.47379400 |
| C  | -1.84385500 | -3.78598700 | -0.58030500 |
| H  | -0.38534000 | -4.74330500 | -1.90816400 |
| H  | -0.77388900 | -3.01971300 | -2.25857500 |
| C  | -3.10945200 | -4.08384600 | -1.37385900 |
| H  | -1.71328700 | -4.51147600 | 0.23237500  |
| H  | -1.93570900 | -2.78928600 | -0.14838000 |
| H  | -3.98801900 | -4.08147400 | -0.72060100 |
| H  | -3.24984500 | -3.31174000 | -2.13744400 |
| H  | -3.05459300 | -5.05661100 | -1.87374900 |

M6SS

|   |             |             |             |
|---|-------------|-------------|-------------|
| C | -1.34736000 | 0.53549200  | -1.47944700 |
| O | -2.09429300 | -0.36704300 | -1.98895500 |
| C | -0.00331600 | 0.73788900  | -1.61555500 |
| C | 0.82369900  | -0.20489100 | -2.43070400 |
| H | 0.46567400  | 1.62550900  | -1.21437600 |
| C | 1.21346800  | 0.40721600  | -3.78425400 |
| H | 0.17955800  | -1.05670500 | -2.65401500 |
| H | 0.30513500  | 0.59795500  | -4.36113600 |
| H | 1.85607900  | -0.26913400 | -4.36010900 |
| H | 1.74606000  | 1.35408500  | -3.65913400 |
| C | 2.97772800  | -0.92603700 | 0.73524200  |
| O | 2.79922900  | -0.23815400 | 1.72259600  |
| C | 1.87351300  | -1.23293000 | -0.24601600 |
| C | 2.09536000  | -0.73857500 | -1.68314400 |
| H | 2.42804500  | -1.61352100 | -2.25994300 |
| C | 4.32640500  | -1.48513800 | 0.40881700  |
| C | 4.45472000  | -2.63126400 | -0.38084000 |
| C | 5.46031600  | -0.82887100 | 0.89075300  |
| C | 5.72238900  | -3.11949700 | -0.68351400 |
| H | 3.56256900  | -3.13497600 | -0.75022100 |
| C | 6.72359500  | -1.30869700 | 0.56948700  |
| H | 5.32832600  | 0.06550400  | 1.49214000  |
| C | 6.85395000  | -2.45440800 | -0.21590800 |
| H | 5.82677700  | -4.01453400 | -1.28815900 |
| H | 7.60868500  | -0.79184600 | 0.92624100  |
| H | 7.84205700  | -2.82897000 | -0.46474500 |
| C | 3.21920500  | 0.28494700  | -1.74453200 |
| C | 4.31407500  | 0.06870800  | -2.58339700 |
| C | 3.18520000  | 1.45855300  | -0.98431300 |
| C | 5.35102800  | 0.99296000  | -2.66257100 |
| H | 4.36001600  | -0.84799600 | -3.16610600 |
| C | 4.21775500  | 2.38911500  | -1.06367200 |
| H | 2.35839200  | 1.62631100  | -0.29987200 |
| C | 5.30519100  | 2.15906600  | -1.90259400 |
| H | 6.19780000  | 0.79869700  | -3.31344900 |
| H | 4.17608800  | 3.29296600  | -0.46269400 |
| H | 6.11341800  | 2.88119200  | -1.95971800 |
| C | 0.85395400  | -1.98929700 | 0.18211000  |
| O | -0.21726500 | -2.28360200 | -0.65152200 |
| C | 0.65945900  | -2.60464700 | 1.51939400  |
| C | 1.70345300  | -3.19467700 | 2.23537800  |
| C | -0.63606600 | -2.64857300 | 2.05235500  |
| C | 1.46301200  | -3.78405900 | 3.47320000  |
| H | 2.70516900  | -3.21611100 | 1.81717200  |

|    |             |             |             |
|----|-------------|-------------|-------------|
| C  | -0.87346700 | -3.23047900 | 3.29154600  |
| H  | -1.45344600 | -2.20581200 | 1.49061300  |
| C  | 0.17829400  | -3.79870300 | 4.00813200  |
| H  | 2.28354500  | -4.24372800 | 4.01444600  |
| H  | -1.88070300 | -3.24106600 | 3.69696400  |
| H  | -0.00426800 | -4.25907200 | 4.97378700  |
| C  | -4.78292600 | -0.48877200 | -0.23422500 |
| C  | -6.13787000 | -0.54281700 | 0.07980000  |
| C  | -6.62711000 | -1.56966000 | 0.88373800  |
| C  | -5.73914000 | -2.52854800 | 1.36433700  |
| C  | -4.38226300 | -2.47464800 | 1.03233400  |
| C  | -3.88913200 | -1.45652600 | 0.21969700  |
| C  | -4.46836200 | 0.71226800  | -1.09811800 |
| C  | -5.82360200 | 1.51211500  | -1.18242600 |
| C  | -6.90030400 | 0.58155300  | -0.57188500 |
| H  | -7.68280400 | -1.62076500 | 1.13360800  |
| H  | -6.10513900 | -3.33060700 | 1.99752700  |
| H  | -3.70881300 | -3.24370700 | 1.40214700  |
| H  | -2.84896900 | -1.41633600 | -0.10211800 |
| H  | -6.04013100 | 1.74479800  | -2.22511800 |
| H  | -7.52560700 | 1.14642600  | 0.12766500  |
| H  | -4.08465800 | 0.42045700  | -2.07326500 |
| H  | -7.56409600 | 0.20156600  | -1.35480200 |
| C  | -3.73250700 | 2.46924400  | 0.48339100  |
| C  | -2.07387700 | 1.48934400  | -0.57463400 |
| N  | -2.67242900 | 3.02358600  | 0.98041400  |
| N  | -3.41925900 | 1.54036300  | -0.47138400 |
| N  | -1.64453600 | 2.39920000  | 0.32328500  |
| C  | -5.17463300 | 2.76366200  | 0.72318300  |
| H  | -5.61861800 | 2.00772600  | 1.38679300  |
| H  | -5.28906700 | 3.74847900  | 1.17559700  |
| C  | -0.32548900 | 2.74311900  | 0.72827800  |
| C  | 0.28388100  | 3.89202100  | 0.22247000  |
| C  | 0.32666000  | 1.99473100  | 1.71054500  |
| C  | 1.52569800  | 4.30259000  | 0.68995300  |
| C  | 1.57069200  | 2.38627700  | 2.19148200  |
| C  | 2.14272400  | 3.54476300  | 1.68031400  |
| H  | 1.99296400  | 5.19591600  | 0.29411500  |
| H  | 2.08356400  | 1.78065500  | 2.92690900  |
| Cl | -0.51124100 | 4.80456300  | -1.01318600 |
| Cl | 3.68763600  | 4.05486100  | 2.28850900  |
| Cl | -0.40825200 | 0.56096100  | 2.31877800  |
| O  | -5.79202300 | 2.78117000  | -0.54622600 |
| C  | -0.03259700 | -3.19914000 | -1.64420000 |

|   |             |             |             |
|---|-------------|-------------|-------------|
| O | 1.03786500  | -3.69994800 | -1.88297300 |
| C | -1.33889000 | -3.44826900 | -2.34038300 |
| C | -2.31186800 | -4.21106800 | -1.42848700 |
| H | -1.13682000 | -4.00650300 | -3.25714700 |
| H | -1.76021900 | -2.46207800 | -2.57342400 |
| C | -3.72082100 | -4.23407000 | -2.00997700 |
| H | -1.94485000 | -5.23128700 | -1.26969400 |
| H | -2.32537600 | -3.72391500 | -0.44743100 |
| H | -4.41118000 | -4.77232900 | -1.35456100 |
| H | -4.09772800 | -3.21330300 | -2.12986700 |
| H | -3.73333300 | -4.72014000 | -2.99076000 |

TS7RR

|   |             |             |             |
|---|-------------|-------------|-------------|
| C | -1.37026400 | -0.35265700 | -1.21197400 |
| O | -1.98015800 | -0.07695000 | -2.24498000 |
| C | 0.03682300  | -0.32072200 | -1.02055200 |
| C | 0.87385100  | -0.55448200 | -2.25854900 |
| H | 0.39827300  | -0.80625200 | -0.11357000 |
| C | 0.84470500  | -1.99344200 | -2.75826100 |
| H | 0.45151700  | 0.10659300  | -3.02269300 |
| H | -0.17338500 | -2.25245300 | -3.06389000 |
| H | 1.50489500  | -2.12958300 | -3.62183200 |
| H | 1.16597700  | -2.69369400 | -1.97882200 |
| C | 0.41661900  | 1.48821800  | -0.86280100 |
| O | -0.23503700 | 2.10583200  | -1.76857600 |
| C | 1.93485200  | 1.28189100  | -1.11394600 |
| C | 2.26586100  | 0.01094300  | -1.88625600 |
| H | 2.80812000  | 0.28509000  | -2.79974800 |
| C | 0.05200400  | 1.83386100  | 0.59396800  |
| C | 0.91654500  | 1.70860800  | 1.68450800  |
| C | -1.22572400 | 2.35506300  | 0.81435800  |
| C | 0.49936600  | 2.08590400  | 2.96072600  |
| H | 1.93990100  | 1.37131500  | 1.54044800  |
| C | -1.66253500 | 2.68514200  | 2.09365200  |
| H | -1.83982700 | 2.53588500  | -0.06365400 |
| C | -0.79323400 | 2.55392000  | 3.17646500  |
| H | 1.19466800  | 2.00706400  | 3.79164100  |
| H | -2.66926500 | 3.06418300  | 2.24760300  |
| H | -1.11567900 | 2.83462800  | 4.17444800  |
| C | 3.11518500  | -1.02924000 | -1.17477200 |
| C | 3.98467400  | -1.82308700 | -1.93331100 |
| C | 3.01539100  | -1.28992300 | 0.19585700  |
| C | 4.72524000  | -2.84813800 | -1.35136600 |
| H | 4.07578700  | -1.63327700 | -3.00054200 |

|   |             |             |             |
|---|-------------|-------------|-------------|
| C | 3.76140700  | -2.30850700 | 0.78481200  |
| H | 2.38258200  | -0.66354600 | 0.81915300  |
| C | 4.61465400  | -3.09607100 | 0.01542000  |
| H | 5.38845300  | -3.45065700 | -1.96470600 |
| H | 3.68365600  | -2.48097600 | 1.85451300  |
| H | 5.18998800  | -3.89115800 | 0.47903600  |
| C | 2.87654600  | 2.17626500  | -0.78274800 |
| O | 4.21053500  | 1.78276100  | -1.03978600 |
| C | 2.72906500  | 3.55014000  | -0.25437500 |
| C | 1.61393300  | 4.32601100  | -0.60343200 |
| C | 3.71454700  | 4.11714400  | 0.56470900  |
| C | 1.47525200  | 5.61806500  | -0.10844200 |
| H | 0.86116200  | 3.90592500  | -1.26332700 |
| C | 3.57153800  | 5.41187500  | 1.05102200  |
| H | 4.58486400  | 3.53846300  | 0.84697200  |
| C | 2.44869200  | 6.16650000  | 0.72202900  |
| H | 0.60320900  | 6.20268000  | -0.38458600 |
| H | 4.34026000  | 5.83009800  | 1.69346600  |
| H | 2.33790600  | 7.17631800  | 1.10499100  |
| C | 4.86828200  | 1.17777900  | -0.02411600 |
| O | 4.47378900  | 1.17731800  | 1.11743300  |
| C | 6.12982200  | 0.48386200  | -0.47454200 |
| C | 6.50922900  | 0.64026600  | -1.94229800 |
| H | 6.93609300  | 0.81960200  | 0.18710800  |
| H | 5.96124300  | -0.57544400 | -0.23474500 |
| C | 7.70244200  | -0.24130900 | -2.29785700 |
| H | 6.72970400  | 1.69086400  | -2.15816600 |
| H | 5.64851100  | 0.37181100  | -2.56248100 |
| H | 7.98045400  | -0.13068200 | -3.34883100 |
| H | 7.46483100  | -1.29539500 | -2.11842500 |
| H | 8.57720300  | 0.01086000  | -1.69000300 |
| C | -5.21422900 | 0.46367000  | -1.39505600 |
| C | -6.41286200 | 1.14490300  | -1.20255500 |
| C | -7.57098300 | 0.70445000  | -1.83712900 |
| C | -7.50217100 | -0.42064000 | -2.65540900 |
| C | -6.29305700 | -1.09389400 | -2.84756800 |
| C | -5.13113800 | -0.65325900 | -2.22005600 |
| C | -4.09465900 | 1.11281500  | -0.61237100 |
| C | -4.81704800 | 2.15610900  | 0.31665000  |
| C | -6.22385100 | 2.33565600  | -0.29740800 |
| H | -8.51265800 | 1.22598100  | -1.69472600 |
| H | -8.39875900 | -0.77745200 | -3.15220900 |
| H | -6.25939700 | -1.96324800 | -3.49568500 |
| H | -4.17581800 | -1.14520400 | -2.37647600 |

|    |             |             |             |
|----|-------------|-------------|-------------|
| H  | -4.25373600 | 3.09029700  | 0.33764200  |
| H  | -6.97006300 | 2.40714400  | 0.49973600  |
| H  | -3.34918200 | 1.57347800  | -1.26450000 |
| H  | -6.26987300 | 3.26793500  | -0.86978500 |
| C  | -3.91745800 | -0.33427700 | 1.38960600  |
| C  | -2.24546800 | -0.53098100 | 0.00477300  |
| N  | -3.17175400 | -1.25948800 | 1.91775100  |
| N  | -3.39386000 | 0.11878600  | 0.21009700  |
| N  | -2.13408700 | -1.37671600 | 1.03556400  |
| C  | -5.12348900 | 0.38240300  | 1.90352400  |
| H  | -6.03165300 | 0.03464200  | 1.39261900  |
| H  | -5.22814100 | 0.22709700  | 2.97687700  |
| C  | -1.13852500 | -2.37902500 | 1.20569300  |
| C  | -0.24217400 | -2.30735000 | 2.27492100  |
| C  | -1.02822500 | -3.42690200 | 0.28671300  |
| C  | 0.77095900  | -3.24849300 | 2.41003400  |
| C  | -0.01242500 | -4.36599600 | 0.40006000  |
| C  | 0.87876100  | -4.25898700 | 1.46230500  |
| H  | 1.46550300  | -3.18288500 | 3.23862000  |
| H  | 0.07689300  | -5.16485300 | -0.32557100 |
| Cl | -0.35812800 | -1.01912700 | 3.40901300  |
| Cl | 2.14930800  | -5.42441100 | 1.61496000  |
| Cl | -2.16086700 | -3.57163700 | -1.01381500 |
| O  | -4.87937900 | 1.75781600  | 1.68086000  |

TS7RS

|   |             |             |             |
|---|-------------|-------------|-------------|
| C | -1.17672700 | 0.44676300  | 1.14696400  |
| O | -1.39979100 | 0.13092900  | 2.30131800  |
| C | 0.10458600  | 0.80335100  | 0.57513700  |
| C | 1.13178700  | 1.20537200  | 1.61098500  |
| H | 0.04161300  | 1.47066400  | -0.29130200 |
| C | 1.01091200  | 2.65245800  | 2.07002800  |
| H | 0.99421600  | 0.53299600  | 2.46632600  |
| H | 0.03302000  | 2.82926400  | 2.52883900  |
| H | 1.78255800  | 2.89986000  | 2.80527000  |
| H | 1.12027500  | 3.33624200  | 1.21950100  |
| C | 0.73524500  | -0.76688100 | 0.02849800  |
| O | 0.25797800  | -1.71847400 | 0.78051600  |
| C | 2.24499300  | -0.43753300 | 0.22184500  |
| C | 2.48183200  | 0.86849200  | 0.95642800  |
| H | 2.67804900  | 1.63606700  | 0.18972800  |
| C | 0.38214100  | -0.83544400 | -1.47414100 |
| C | 1.07592400  | -0.11378800 | -2.45132400 |
| C | -0.63755400 | -1.69364100 | -1.88117600 |

|   |             |             |             |
|---|-------------|-------------|-------------|
| C | 0.74926400  | -0.25542700 | -3.79713300 |
| H | 1.91115900  | 0.52184500  | -2.16292800 |
| C | -0.99682700 | -1.80898800 | -3.22149500 |
| H | -1.09880600 | -2.31566800 | -1.12378800 |
| C | -0.29726900 | -1.09068200 | -4.18870200 |
| H | 1.31542100  | 0.29047900  | -4.54644700 |
| H | -1.80144000 | -2.48229500 | -3.50407000 |
| H | -0.55039000 | -1.19425500 | -5.23961400 |
| C | 3.61112700  | 0.91867000  | 1.96148800  |
| C | 4.47962800  | 2.01104800  | 1.98432400  |
| C | 3.76083200  | -0.08054000 | 2.92924500  |
| C | 5.48034500  | 2.11145300  | 2.95072500  |
| H | 4.36888500  | 2.78855400  | 1.23104400  |
| C | 4.75546200  | 0.01805000  | 3.89683100  |
| H | 3.09433500  | -0.93990700 | 2.90589500  |
| C | 5.61908900  | 1.11488100  | 3.91186600  |
| H | 6.14700000  | 2.96882100  | 2.95163000  |
| H | 4.86252900  | -0.76522600 | 4.64092900  |
| H | 6.39634600  | 1.18778500  | 4.66610300  |
| C | 3.23023100  | -1.18370600 | -0.29553600 |
| O | 4.56849800  | -0.79476500 | -0.10027400 |
| C | 3.15929700  | -2.42354700 | -1.10080800 |
| C | 2.16141500  | -3.38788700 | -0.91174300 |
| C | 4.12967800  | -2.63698300 | -2.08961900 |
| C | 2.12994100  | -4.52253100 | -1.71725400 |
| H | 1.41538500  | -3.22395500 | -0.13922500 |
| C | 4.09221700  | -3.77238100 | -2.88955400 |
| H | 4.91478900  | -1.90278100 | -2.23879800 |
| C | 3.08847800  | -4.72072400 | -2.70758300 |
| H | 1.35056300  | -5.26311400 | -1.56341900 |
| H | 4.84729900  | -3.91591100 | -3.65616500 |
| H | 3.05871300  | -5.61005800 | -3.32958900 |
| C | 5.02734500  | 0.33316800  | -0.67814000 |
| O | 4.37106800  | 1.03522800  | -1.41049200 |
| C | 6.47064000  | 0.60151500  | -0.31523700 |
| C | 7.04785800  | -0.26954400 | 0.79582400  |
| H | 7.05215500  | 0.50275300  | -1.24068100 |
| H | 6.51689900  | 1.66144400  | -0.04190800 |
| C | 8.41416300  | 0.23556400  | 1.24742300  |
| H | 7.11696000  | -1.30494400 | 0.44722600  |
| H | 6.35444800  | -0.27245300 | 1.64166600  |
| H | 8.83562400  | -0.40837900 | 2.02339500  |
| H | 8.33182600  | 1.24684300  | 1.65991500  |
| H | 9.12483800  | 0.26934800  | 0.41495800  |



|       |             |             |             |
|-------|-------------|-------------|-------------|
| C     | -3.86725700 | -2.29323800 | 1.95906500  |
| C     | -4.59163000 | -3.48086500 | 1.88535900  |
| C     | -5.61724500 | -3.72980600 | 2.79379300  |
| C     | -5.90447900 | -2.77283600 | 3.76386900  |
| C     | -5.17279800 | -1.58496500 | 3.83252900  |
| C     | -4.14254300 | -1.33486900 | 2.93038500  |
| C     | -2.81348300 | -2.22909000 | 0.87474300  |
| C     | -3.12466100 | -3.46809500 | -0.04698600 |
| C     | -4.09097500 | -4.35792700 | 0.76708100  |
| H     | -6.18672300 | -4.65312700 | 2.74436900  |
| H     | -6.70386100 | -2.95215100 | 4.47577000  |
| H     | -5.40488200 | -0.85344700 | 4.59965200  |
| H     | -3.54987400 | -0.42721300 | 2.98428400  |
| H     | -2.19705000 | -3.98863200 | -0.28608200 |
| H     | -4.88634200 | -4.73612500 | 0.11692000  |
| H     | -1.77282800 | -2.23385300 | 1.22635700  |
| H     | -3.55806000 | -5.22805700 | 1.16349200  |
| C     | -3.90580300 | -0.84782700 | -0.88703400 |
| C     | -2.31371700 | 0.17053800  | 0.18439400  |
| N     | -3.89884000 | 0.35340200  | -1.38803500 |
| N     | -2.96446400 | -0.98794300 | 0.09608000  |
| N     | -2.89737900 | 0.97893700  | -0.70043900 |
| C     | -4.63497300 | -2.08864400 | -1.28859000 |
| H     | -5.44838100 | -2.30711800 | -0.58300600 |
| H     | -5.04429800 | -1.97904000 | -2.29236900 |
| C     | -2.67931700 | 2.37887600  | -0.83139500 |
| C     | -2.11672900 | 2.89864800  | -1.99927000 |
| C     | -3.04769900 | 3.24379800  | 0.20383500  |
| C     | -1.90471600 | 4.26566600  | -2.12870800 |
| C     | -2.83231800 | 4.61044200  | 0.09329600  |
| C     | -2.26216300 | 5.10062300  | -1.07658800 |
| H     | -1.46045700 | 4.66479000  | -3.03207100 |
| H     | -3.11214700 | 5.27618800  | 0.90009300  |
| Cl    | -1.63934300 | 1.82745100  | -3.25580000 |
| Cl    | -1.99396800 | 6.80609800  | -1.22725200 |
| Cl    | -3.79673600 | 2.62208100  | 1.63566900  |
| O     | -3.66213700 | -3.11399600 | -1.31698000 |
| TS7SR |             |             |             |
| C     | 1.07081700  | 0.38883100  | -1.10868300 |
| O     | 1.14521500  | 0.08550800  | -2.27919800 |
| C     | -0.07025500 | 0.88097000  | -0.33341800 |
| C     | -1.21800200 | 1.51711100  | -1.11286100 |
| H     | 0.26826300  | 1.48886400  | 0.50844300  |

|   |             |             |             |
|---|-------------|-------------|-------------|
| C | -0.80698600 | 2.40735900  | -2.28421100 |
| H | -1.77621600 | 2.12486500  | -0.38754200 |
| H | -1.67512700 | 2.92713800  | -2.69742500 |
| H | -0.08364700 | 3.16152500  | -1.95494300 |
| H | -0.34760900 | 1.81661400  | -3.07944800 |
| C | -0.69517900 | -0.63504600 | 0.28703000  |
| O | -0.09543300 | -1.66930400 | -0.27083400 |
| C | -2.16171100 | -0.46955600 | -0.18740800 |
| C | -2.11591100 | 0.31875600  | -1.48538000 |
| H | -1.50866600 | -0.32375700 | -2.14320200 |
| C | -0.48381100 | -0.50719200 | 1.80480000  |
| C | -1.25296600 | 0.33970900  | 2.60991400  |
| C | 0.52683600  | -1.26427700 | 2.39534700  |
| C | -1.02254300 | 0.40801500  | 3.97979500  |
| H | -2.07000900 | 0.90552700  | 2.16542000  |
| C | 0.76746000  | -1.18884900 | 3.76597800  |
| H | 1.09184100  | -1.94444000 | 1.76520700  |
| C | -0.00941600 | -0.35368500 | 4.56521600  |
| H | -1.64347600 | 1.04968100  | 4.59808900  |
| H | 1.55342200  | -1.79424300 | 4.20947100  |
| H | 0.16197600  | -0.30397000 | 5.63632700  |
| C | -3.35564700 | 0.69718500  | -2.26543900 |
| C | -3.70430200 | -0.04105900 | -3.40052800 |
| C | -4.10800100 | 1.83863600  | -1.96496800 |
| C | -4.77081900 | 0.34088200  | -4.21127500 |
| H | -3.12068000 | -0.92181500 | -3.65473300 |
| C | -5.17833800 | 2.22235400  | -2.77025800 |
| H | -3.85703500 | 2.43493800  | -1.09199500 |
| C | -5.51256700 | 1.47766000  | -3.89972700 |
| H | -5.01856400 | -0.24747100 | -5.08933400 |
| H | -5.74631700 | 3.11342500  | -2.51840800 |
| H | -6.34176000 | 1.78214100  | -4.53062200 |
| C | -3.21664300 | -1.00864200 | 0.42853000  |
| O | -4.51787600 | -0.77251600 | -0.05948800 |
| C | -3.22623500 | -1.93456400 | 1.58514800  |
| C | -2.26308500 | -2.94393300 | 1.69826500  |
| C | -4.23544700 | -1.84596600 | 2.55132300  |
| C | -2.29981500 | -3.82610900 | 2.77380300  |
| H | -1.48206700 | -3.00558100 | 0.94356800  |
| C | -4.26972900 | -2.73208000 | 3.62133900  |
| H | -4.98458800 | -1.06397200 | 2.48286000  |
| C | -3.30133800 | -3.72677900 | 3.73620800  |
| H | -1.54323600 | -4.60066400 | 2.85701800  |
| H | -5.05209400 | -2.64324500 | 4.36871400  |

|   |             |             |             |
|---|-------------|-------------|-------------|
| H | -3.32835000 | -4.41983100 | 4.57144000  |
| C | -5.13860300 | 0.34113600  | 0.37940100  |
| O | -4.63150400 | 1.14534000  | 1.12559500  |
| C | -6.55249300 | 0.44435200  | -0.14196300 |
| C | -6.90154400 | -0.49339700 | -1.29309300 |
| H | -7.21505100 | 0.27592500  | 0.71720600  |
| H | -6.69008900 | 1.49185600  | -0.43025200 |
| C | -8.23965300 | -0.12408200 | -1.92411000 |
| H | -6.91974500 | -1.52489900 | -0.92775000 |
| H | -6.10905900 | -0.44442800 | -2.04467600 |
| H | -8.49738700 | -0.80862500 | -2.73624800 |
| H | -8.19946300 | 0.88890300  | -2.33907900 |
| H | -9.05075300 | -0.15296900 | -1.18884600 |
| C | 3.52853100  | -2.69785400 | -1.95448100 |
| C | 4.07629200  | -3.97329800 | -1.83744000 |
| C | 5.00557600  | -4.41862000 | -2.77275300 |
| C | 5.37281600  | -3.56869300 | -3.81399800 |
| C | 4.81262800  | -2.29399300 | -3.92858400 |
| C | 3.87776200  | -1.84691600 | -2.99784200 |
| C | 2.54191600  | -2.43573700 | -0.84183200 |
| C | 2.74935000  | -3.62319400 | 0.16105300  |
| C | 3.50622500  | -4.70215300 | -0.64569500 |
| H | 5.44072400  | -5.41019800 | -2.69056900 |
| H | 6.10038000  | -3.90228900 | -4.54705600 |
| H | 5.10428200  | -1.65094100 | -4.75236700 |
| H | 3.41587400  | -0.86676000 | -3.08407700 |
| H | 1.77878100  | -3.96447900 | 0.52173400  |
| H | 4.26491600  | -5.17771400 | -0.01653900 |
| H | 1.49542100  | -2.35722400 | -1.15143200 |
| H | 2.81329400  | -5.48624700 | -0.96822100 |
| C | 3.88238200  | -1.06175000 | 0.72707000  |
| C | 2.28097200  | 0.02822100  | -0.25556200 |
| N | 4.01090600  | 0.15751800  | 1.16436900  |
| N | 2.84978600  | -1.17020000 | -0.16471500 |
| N | 3.00278200  | 0.82874400  | 0.53172100  |
| C | 4.52186400  | -2.34477700 | 1.15070900  |
| H | 5.23668600  | -2.69704700 | 0.39496600  |
| H | 5.03327600  | -2.21441400 | 2.10402200  |
| C | 2.90799400  | 2.24635700  | 0.61590500  |
| C | 2.45162700  | 2.85536800  | 1.78773300  |
| C | 3.29760500  | 3.03687800  | -0.46933200 |
| C | 2.38003600  | 4.23992700  | 1.87621700  |
| C | 3.22340100  | 4.42122900  | -0.39843900 |
| C | 2.76707100  | 5.00209100  | 0.78000700  |

|    |            |             |             |
|----|------------|-------------|-------------|
| H  | 2.01787300 | 4.70898900  | 2.78261500  |
| H  | 3.52207400 | 5.03004800  | -1.24249500 |
| Cl | 1.92743500 | 1.87853600  | 3.10160600  |
| Cl | 2.67845200 | 6.72933900  | 0.88307300  |
| Cl | 3.89147500 | 2.29622900  | -1.91716000 |
| O  | 3.45381000 | -3.25157400 | 1.34438300  |

TS7SS

|   |             |             |             |
|---|-------------|-------------|-------------|
| C | -1.21452400 | 0.43075600  | 1.26484700  |
| O | -1.59974100 | 0.07716300  | 2.36119200  |
| C | 0.13062400  | 0.76613200  | 0.81967200  |
| C | 1.18616100  | 1.12724200  | 1.86926800  |
| H | 0.11459500  | 1.47482700  | -0.01639900 |
| C | 1.05493600  | 0.37496700  | 3.19607500  |
| H | 1.16689200  | 2.20613900  | 2.06942400  |
| H | 1.92492000  | 0.57611500  | 3.82388300  |
| H | 0.16354500  | 0.68855300  | 3.73616800  |
| H | 0.97564400  | -0.69997400 | 3.00838400  |
| C | 0.70131400  | -0.76059500 | 0.17552700  |
| O | 0.18802800  | -1.75409300 | 0.85835300  |
| C | 2.22736800  | -0.48299100 | 0.35201500  |
| C | 2.50629200  | 0.79719000  | 1.11545000  |
| H | 2.63102900  | 1.58227900  | 0.35310900  |
| C | 0.36315600  | -0.74760300 | -1.33965800 |
| C | 1.04768900  | 0.04070100  | -2.27055800 |
| C | -0.60644800 | -1.63082900 | -1.80804500 |
| C | 0.77224000  | -0.07365000 | -3.63036400 |
| H | 1.84801800  | 0.69968700  | -1.94074500 |
| C | -0.92352300 | -1.71443400 | -3.16145200 |
| H | -1.04963600 | -2.30173000 | -1.08371400 |
| C | -0.22384000 | -0.93928300 | -4.08253700 |
| H | 1.33804400  | 0.52123000  | -4.34183900 |
| H | -1.69052800 | -2.41076600 | -3.48934400 |
| H | -0.43781800 | -1.02080200 | -5.14411700 |
| C | 3.73710200  | 0.83861400  | 1.99760200  |
| C | 4.51479000  | 1.99643400  | 2.04638000  |
| C | 4.09742300  | -0.23998500 | 2.81514600  |
| C | 5.61683000  | 2.08810100  | 2.89817400  |
| H | 4.25666200  | 2.83430500  | 1.40191500  |
| C | 5.18150700  | -0.14642200 | 3.67996800  |
| H | 3.51713700  | -1.15707500 | 2.76167600  |
| C | 5.94711900  | 1.02016200  | 3.72566400  |
| H | 6.21152900  | 2.99662900  | 2.91534000  |
| H | 5.44057100  | -0.99123300 | 4.31061000  |

|   |             |             |             |
|---|-------------|-------------|-------------|
| H | 6.80057000  | 1.08799300  | 4.39300200  |
| C | 3.18288000  | -1.19602800 | -0.26274000 |
| O | 4.52833000  | -0.79037900 | -0.16016400 |
| C | 3.06806600  | -2.40637600 | -1.10534200 |
| C | 2.06975500  | -3.36785300 | -0.90298900 |
| C | 3.99483700  | -2.59843500 | -2.13923400 |
| C | 1.99468400  | -4.47772900 | -1.73937700 |
| H | 1.35434700  | -3.21609200 | -0.09875600 |
| C | 3.91428200  | -3.70955000 | -2.96923300 |
| H | 4.78172400  | -1.86848000 | -2.29780500 |
| C | 2.91041400  | -4.65483700 | -2.77331800 |
| H | 1.21543400  | -5.21640000 | -1.57537300 |
| H | 4.63713300  | -3.83744900 | -3.76893600 |
| H | 2.84786600  | -5.52606200 | -3.41818000 |
| C | 4.91696600  | 0.36318200  | -0.74114000 |
| O | 4.18838000  | 1.07554900  | -1.39054100 |
| C | 6.38065600  | 0.65755300  | -0.50369700 |
| C | 7.09593200  | -0.25336800 | 0.48712400  |
| H | 6.86747800  | 0.63800400  | -1.48700200 |
| H | 6.41966400  | 1.70017900  | -0.16869000 |
| C | 8.48581700  | 0.27575900  | 0.82497800  |
| H | 7.15963200  | -1.26489200 | 0.07281000  |
| H | 6.49541000  | -0.32664600 | 1.39749000  |
| H | 9.00552000  | -0.39195500 | 1.51680400  |
| H | 8.41457900  | 1.26039800  | 1.29938900  |
| H | 9.10497000  | 0.37901900  | -0.07244200 |
| C | -4.02896300 | -2.24639800 | 1.78448700  |
| C | -4.73717800 | -3.43774200 | 1.63898800  |
| C | -5.83398000 | -3.70552500 | 2.45269100  |
| C | -6.21347400 | -2.76104900 | 3.40277100  |
| C | -5.50243900 | -1.56736100 | 3.54247000  |
| C | -4.39942300 | -1.29932800 | 2.73548600  |
| C | -2.88733000 | -2.17369900 | 0.78969700  |
| C | -3.14779500 | -3.38135500 | -0.18561300 |
| C | -4.14300800 | -4.29846400 | 0.55558400  |
| H | -6.38774400 | -4.63331800 | 2.34353800  |
| H | -7.07035500 | -2.95407300 | 4.04039400  |
| H | -5.81002100 | -0.84321800 | 4.28985300  |
| H | -3.82736400 | -0.38398900 | 2.84699700  |
| H | -2.20983800 | -3.89330100 | -0.40104300 |
| H | -4.88259600 | -4.69408800 | -0.14719800 |
| H | -1.87875800 | -2.21646200 | 1.22227000  |
| H | -3.61460100 | -5.15504900 | 0.98687800  |
| C | -3.83917100 | -0.72298100 | -0.98535700 |

|    |             |             |             |
|----|-------------|-------------|-------------|
| C  | -2.27287500 | 0.22860500  | 0.18491000  |
| N  | -3.78355900 | 0.49058800  | -1.45069100 |
| N  | -2.95010200 | -0.90985300 | 0.03660200  |
| N  | -2.80022000 | 1.07570000  | -0.70108700 |
| C  | -4.57830900 | -1.93469600 | -1.45402300 |
| H  | -5.43158800 | -2.14967300 | -0.79619300 |
| H  | -4.93349200 | -1.78826500 | -2.47384600 |
| C  | -2.57643000 | 2.47930200  | -0.77699300 |
| C  | -2.02213100 | 3.04552000  | -1.92785200 |
| C  | -2.96647800 | 3.30950600  | 0.27962400  |
| C  | -1.81612000 | 4.41721700  | -2.00827700 |
| C  | -2.75841100 | 4.68038400  | 0.21712900  |
| C  | -2.18018500 | 5.21366000  | -0.92944600 |
| H  | -1.37555300 | 4.84944900  | -2.89802800 |
| H  | -3.05334400 | 5.31662000  | 1.04207500  |
| Cl | -1.56925100 | 2.03292200  | -3.23934700 |
| Cl | -1.91778500 | 6.92442000  | -1.01933300 |
| Cl | -3.75060900 | 2.64384100  | 1.67250700  |
| O  | -3.63291800 | -2.98575400 | -1.46484600 |

M7RR

|   |             |             |             |
|---|-------------|-------------|-------------|
| C | 1.11467200  | 0.16914600  | -1.13048800 |
| O | 1.63055600  | 0.31732200  | -2.28335400 |
| C | -0.25205400 | 0.78972900  | -0.69475000 |
| C | -1.12402800 | 0.99560100  | -1.93557400 |
| H | -0.26299500 | 1.63882800  | -0.00699200 |
| C | -1.25345000 | 2.45648800  | -2.34569500 |
| H | -0.61242400 | 0.46767600  | -2.74724700 |
| H | -0.26341000 | 2.84199900  | -2.60993400 |
| H | -1.90737100 | 2.56975000  | -3.21623300 |
| H | -1.66101400 | 3.07162300  | -1.53679200 |
| C | -0.61960900 | -0.60521000 | -0.13158300 |
| O | 0.51437300  | -1.19448800 | -0.80824300 |
| C | -1.98999900 | -0.90676100 | -0.72905500 |
| C | -2.44005000 | 0.22288900  | -1.65423300 |
| H | -2.82255400 | -0.21079400 | -2.58567200 |
| C | -0.53962700 | -0.81405100 | 1.37554900  |
| C | -1.60063700 | -0.46041800 | 2.21755900  |
| C | 0.60403400  | -1.36935700 | 1.95209000  |
| C | -1.48427400 | -0.59588500 | 3.59693800  |
| H | -2.54284000 | -0.12619600 | 1.79318600  |
| C | 0.72306900  | -1.50719300 | 3.33266700  |
| H | 1.39451300  | -1.72891300 | 1.30571900  |
| C | -0.31593200 | -1.10251900 | 4.16462800  |

|   |             |             |             |
|---|-------------|-------------|-------------|
| H | -2.32027700 | -0.31681800 | 4.23081300  |
| H | 1.62897000  | -1.93723900 | 3.74999400  |
| H | -0.23047600 | -1.20759300 | 5.24174400  |
| C | -3.54829400 | 1.09166300  | -1.08884800 |
| C | -4.74240700 | 1.24417200  | -1.79380300 |
| C | -3.40043500 | 1.78358900  | 0.11906800  |
| C | -5.77952600 | 2.03174800  | -1.29341500 |
| H | -4.86038600 | 0.74125900  | -2.75086200 |
| C | -4.43068000 | 2.56732200  | 0.62397700  |
| H | -2.46787700 | 1.70703300  | 0.67211800  |
| C | -5.63036200 | 2.68775700  | -0.07647500 |
| H | -6.70265200 | 2.12923200  | -1.85773100 |
| H | -4.29876200 | 3.08583700  | 1.56855700  |
| H | -6.43652000 | 3.29602500  | 0.32071900  |
| C | -2.74887600 | -1.96600000 | -0.43152900 |
| O | -4.05022500 | -2.00898500 | -0.95901700 |
| C | -2.35990600 | -3.16086900 | 0.34566300  |
| C | -1.08187500 | -3.70897900 | 0.18670700  |
| C | -3.25754300 | -3.76949500 | 1.23110100  |
| C | -0.70228400 | -4.82837600 | 0.92026600  |
| H | -0.39323700 | -3.25058300 | -0.51674200 |
| C | -2.87371300 | -4.88916900 | 1.95972900  |
| H | -4.24390500 | -3.34492100 | 1.37790100  |
| C | -1.59479300 | -5.42120100 | 1.80885400  |
| H | 0.29158100  | -5.24543400 | 0.78839500  |
| H | -3.57402800 | -5.34354800 | 2.65335500  |
| H | -1.29883400 | -6.29616500 | 2.37902800  |
| C | -5.04486900 | -1.48429300 | -0.19704500 |
| O | -4.86879600 | -1.03099500 | 0.90531500  |
| C | -6.39395600 | -1.58462500 | -0.86891600 |
| C | -6.40016100 | -2.02158500 | -2.32990900 |
| H | -6.98760800 | -2.27728600 | -0.25896800 |
| H | -6.85813200 | -0.60035100 | -0.74514000 |
| C | -7.81198100 | -1.99682500 | -2.90792500 |
| H | -5.97217100 | -3.02514300 | -2.41234500 |
| H | -5.74481000 | -1.36308100 | -2.90906200 |
| H | -7.81864400 | -2.31509800 | -3.95301600 |
| H | -8.23618300 | -0.98859000 | -2.85941600 |
| H | -8.47679500 | -2.66304700 | -2.34901300 |
| C | 4.49801200  | -1.80356700 | -1.51658900 |
| C | 5.50062700  | -2.74227200 | -1.28930900 |
| C | 6.54949400  | -2.86860600 | -2.19581300 |
| C | 6.57065000  | -2.03991900 | -3.31575900 |
| C | 5.55654400  | -1.10368400 | -3.53396600 |

|    |             |             |             |
|----|-------------|-------------|-------------|
| C  | 4.50002500  | -0.97535900 | -2.63507800 |
| C  | 3.46597500  | -1.83746900 | -0.41083500 |
| C  | 4.10845900  | -2.75477600 | 0.69519700  |
| C  | 5.24468500  | -3.51891300 | -0.02210400 |
| H  | 7.33881900  | -3.59616300 | -2.03162900 |
| H  | 7.38479000  | -2.12440200 | -4.02877500 |
| H  | 5.58954000  | -0.47339100 | -4.41666800 |
| H  | 3.68293500  | -0.27107400 | -2.78366900 |
| H  | 3.35871200  | -3.42974100 | 1.11137900  |
| H  | 6.11682500  | -3.58864200 | 0.63543000  |
| H  | 2.49611800  | -2.21202100 | -0.74798100 |
| H  | 4.92794000  | -4.54238300 | -0.24925900 |
| C  | 4.13120400  | 0.08868600  | 0.98868500  |
| C  | 2.24190800  | 0.37023800  | -0.08611400 |
| N  | 3.77357600  | 1.29732500  | 1.29546700  |
| N  | 3.23280100  | -0.50068100 | 0.13985500  |
| N  | 2.59663000  | 1.46096700  | 0.60407100  |
| C  | 5.21382000  | -0.79419600 | 1.51693900  |
| H  | 6.01946000  | -0.91502800 | 0.78084200  |
| H  | 5.62195200  | -0.38652000 | 2.44119400  |
| C  | 1.92498100  | 2.71228800  | 0.64177500  |
| C  | 1.10887200  | 3.03949200  | 1.72802500  |
| C  | 2.06020600  | 3.61369700  | -0.41612700 |
| C  | 0.40080300  | 4.23353100  | 1.74509700  |
| C  | 1.35474600  | 4.81179400  | -0.41693400 |
| C  | 0.52950300  | 5.09850100  | 0.66366800  |
| H  | -0.24398700 | 4.47585700  | 2.58059300  |
| H  | 1.45085900  | 5.50309000  | -1.24499000 |
| Cl | 0.92478300  | 1.91893600  | 3.02499100  |
| Cl | -0.36683600 | 6.58380400  | 0.66766000  |
| Cl | 3.11069400  | 3.24617800  | -1.73361700 |
| O  | 4.58173400  | -2.02579000 | 1.82154700  |

M7RS

|   |             |            |             |
|---|-------------|------------|-------------|
| C | -0.87330400 | 0.29448100 | 0.94902900  |
| O | -1.16311500 | 0.47740600 | 2.17111300  |
| C | 0.25313400  | 1.07552000 | 0.19362000  |
| C | 1.33327100  | 1.56792600 | 1.15318900  |
| H | -0.02336600 | 1.82267700 | -0.55534300 |
| C | 1.35040300  | 3.07814700 | 1.33220800  |
| H | 1.14101700  | 1.09778300 | 2.12568900  |
| H | 0.40240300  | 3.41552200 | 1.76307500  |
| H | 2.15989900  | 3.38855000 | 2.00000900  |
| H | 1.48842600  | 3.58251600 | 0.36801000  |



|   |             |             |             |
|---|-------------|-------------|-------------|
| C | 0.73260600  | -0.29238200 | -0.33321900 |
| O | -0.13753800 | -0.99182800 | 0.57354700  |
| C | 2.21817900  | -0.35470600 | -0.00127400 |
| C | 2.64524900  | 0.98443400  | 0.57136000  |
| H | 2.94487600  | 1.61528700  | -0.28177400 |
| C | 0.43278800  | -0.56720800 | -1.79454800 |
| C | 1.18374800  | 0.07913300  | -2.78247600 |
| C | -0.60371900 | -1.41318300 | -2.18150900 |
| C | 0.87090100  | -0.08894000 | -4.12595000 |
| H | 2.03269300  | 0.69520000  | -2.49364000 |
| C | -0.92190300 | -1.58080300 | -3.52809700 |
| H | -1.14452500 | -1.96025300 | -1.41829000 |
| C | -0.19326300 | -0.90895800 | -4.50456600 |
| H | 1.45989100  | 0.41978500  | -4.88301100 |
| H | -1.73996900 | -2.23830700 | -3.80711700 |
| H | -0.43807600 | -1.03551800 | -5.55450100 |
| C | 3.77810600  | 0.98985500  | 1.57130100  |
| C | 4.86240700  | 1.85281300  | 1.40380200  |
| C | 3.73007300  | 0.18557600  | 2.71595400  |
| C | 5.87686900  | 1.92227700  | 2.35846200  |
| H | 4.90998700  | 2.47161900  | 0.51061200  |
| C | 4.73694400  | 0.25659600  | 3.67314100  |
| H | 2.89476300  | -0.49828800 | 2.84772200  |
| C | 5.81358200  | 1.12733100  | 3.49894800  |
| H | 6.71136800  | 2.60151600  | 2.21109800  |
| H | 4.68510800  | -0.37078400 | 4.55756600  |
| H | 6.59901200  | 1.18088200  | 4.24636000  |
| C | 2.99496200  | -1.38764000 | -0.33872200 |
| O | 4.38028000  | -1.35176900 | -0.18943900 |
| C | 2.50783800  | -2.67095500 | -0.88856600 |
| C | 1.46995200  | -3.36282800 | -0.25841700 |
| C | 3.06260500  | -3.18212700 | -2.06641000 |
| C | 0.97279800  | -4.53632000 | -0.81808200 |
| H | 1.05404600  | -2.96330400 | 0.66023000  |
| C | 2.55962300  | -4.35139800 | -2.62490500 |
| H | 3.86864700  | -2.64216900 | -2.55551100 |
| C | 1.51096400  | -5.02901300 | -2.00374900 |
| H | 0.16956700  | -5.07206200 | -0.32038500 |
| H | 2.98128700  | -4.73381200 | -3.54895100 |
| H | 1.12156000  | -5.94308200 | -2.44101500 |
| C | 5.09340400  | -0.38511000 | -0.82192900 |
| O | 4.61779000  | 0.38641500  | -1.61720700 |
| C | 6.55132400  | -0.42501600 | -0.42968200 |
| C | 6.86227500  | -1.17088300 | 0.86537500  |

|    |             |             |             |
|----|-------------|-------------|-------------|
| H  | 7.09785700  | -0.86137400 | -1.27574900 |
| H  | 6.86995500  | 0.62071000  | -0.36711100 |
| C  | 8.29226100  | -0.91169100 | 1.32729400  |
| H  | 6.69521100  | -2.24208500 | 0.71662100  |
| H  | 6.15911600  | -0.85125700 | 1.63992600  |
| H  | 8.51905300  | -1.46883900 | 2.23975900  |
| H  | 8.43944400  | 0.15257800  | 1.53970100  |
| H  | 9.02002800  | -1.20560300 | 0.56359400  |
| C  | -3.60111100 | -2.39130100 | 1.87449400  |
| C  | -4.43668500 | -3.50337000 | 1.82326300  |
| C  | -5.24315600 | -3.81399900 | 2.91465200  |
| C  | -5.19404100 | -2.99260700 | 4.03897600  |
| C  | -4.34712400 | -1.88154700 | 4.07938800  |
| C  | -3.53319000 | -1.56625700 | 2.99336500  |
| C  | -2.82559500 | -2.23736800 | 0.58601600  |
| C  | -3.47388000 | -3.28446400 | -0.39363100 |
| C  | -4.29806200 | -4.23161100 | 0.50965800  |
| H  | -5.90141700 | -4.67738900 | 2.88951400  |
| H  | -5.82097100 | -3.22031300 | 4.89540800  |
| H  | -4.32178100 | -1.25952500 | 4.96816400  |
| H  | -2.85129700 | -0.71570300 | 2.99866200  |
| H  | -2.69581300 | -3.81738100 | -0.94304700 |
| H  | -5.25541600 | -4.46047100 | 0.03072100  |
| H  | -1.75287500 | -2.40080400 | 0.71333900  |
| H  | -3.77021900 | -5.18171200 | 0.64359400  |
| C  | -4.12994200 | -0.51253000 | -0.60899900 |
| C  | -2.19292800 | 0.19415200  | 0.13431400  |
| N  | -4.11650700 | 0.74708400  | -0.91728100 |
| N  | -2.98219500 | -0.88463700 | 0.04097500  |
| N  | -2.90526900 | 1.17404200  | -0.43110300 |
| C  | -5.07669000 | -1.60895000 | -0.97247800 |
| H  | -5.70606800 | -1.88718000 | -0.11659800 |
| H  | -5.71021200 | -1.30230700 | -1.80428500 |
| C  | -2.55097400 | 2.54585700  | -0.52367500 |
| C  | -2.01101400 | 3.05286200  | -1.70840300 |
| C  | -2.74952300 | 3.39587500  | 0.56608900  |
| C  | -1.63134000 | 4.38493700  | -1.79882000 |
| C  | -2.37112500 | 4.73184400  | 0.49376300  |
| C  | -1.81125700 | 5.20219400  | -0.68773800 |
| H  | -1.19850700 | 4.77161400  | -2.71288000 |
| H  | -2.51528100 | 5.38814600  | 1.34304900  |
| Cl | -1.76012200 | 1.99445800  | -3.04903800 |
| Cl | -1.32533600 | 6.86535200  | -0.78209800 |
| Cl | -3.48824000 | 2.79788400  | 2.00444000  |

|      |             |             |             |
|------|-------------|-------------|-------------|
| O    | -4.26709200 | -2.68559400 | -1.41031500 |
| M7SR |             |             |             |
| C    | 0.45928800  | 0.38905700  | -0.77522600 |
| O    | -0.47603500 | 1.18256500  | -1.12997700 |
| C    | 0.29784100  | -1.11646400 | -1.21477800 |
| C    | -0.81330100 | -1.36615200 | -2.22038300 |
| H    | 1.22047300  | -1.67564700 | -1.37994500 |
| C    | -0.54088300 | -2.50563000 | -3.19449200 |
| H    | -0.97873600 | -0.43023900 | -2.76441200 |
| H    | 0.31575600  | -2.28090100 | -3.83695100 |
| H    | -1.41031100 | -2.67997500 | -3.83717800 |
| H    | -0.32639100 | -3.43487500 | -2.65423700 |
| C    | -0.24077700 | -1.28873800 | 0.21894600  |
| O    | 0.43444900  | -0.10171200 | 0.66738300  |
| C    | -1.74786400 | -1.13573800 | 0.04141700  |
| C    | -2.09319700 | -1.63630200 | -1.35659500 |
| H    | -2.22161800 | -2.72844100 | -1.28152100 |
| C    | 0.14453900  | -2.56243600 | 0.94162200  |
| C    | -0.75335400 | -3.62154700 | 1.10523600  |
| C    | 1.44788100  | -2.70161700 | 1.41766100  |
| C    | -0.32964000 | -4.80884000 | 1.69997400  |
| H    | -1.79171400 | -3.50934400 | 0.80257300  |
| C    | 1.86866700  | -3.88326500 | 2.01686900  |
| H    | 2.10878500  | -1.85023700 | 1.33474000  |
| C    | 0.98043700  | -4.94884800 | 2.14986900  |
| H    | -1.03595500 | -5.62391000 | 1.82254600  |
| H    | 2.88674500  | -3.97187800 | 2.38777400  |
| H    | 1.30318800  | -5.87498300 | 2.61488500  |
| C    | -3.31431800 | -1.08048800 | -2.05290100 |
| C    | -4.17206600 | -1.93017300 | -2.75168500 |
| C    | -3.55504500 | 0.29878100  | -2.07686800 |
| C    | -5.26350300 | -1.42024500 | -3.45684000 |
| H    | -3.99160100 | -3.00233700 | -2.73005400 |
| C    | -4.65456300 | 0.80515300  | -2.76002400 |
| H    | -2.86258700 | 0.95102400  | -1.54788200 |
| C    | -5.51457600 | -0.05201900 | -3.45108800 |
| H    | -5.92102300 | -2.09450800 | -3.99735600 |
| H    | -4.84326400 | 1.87468300  | -2.75938700 |
| H    | -6.36995500 | 0.34893200  | -3.98643100 |
| C    | -2.58630600 | -0.65583100 | 0.96667900  |
| O    | -3.95281300 | -0.56485200 | 0.67830000  |
| C    | -2.29595300 | -0.04151700 | 2.28615700  |
| C    | -1.19052400 | -0.38719400 | 3.07254700  |

|    |             |             |             |
|----|-------------|-------------|-------------|
| C  | -3.18224800 | 0.93045500  | 2.77637900  |
| C  | -0.97713100 | 0.22488700  | 4.30335300  |
| H  | -0.49669600 | -1.14649000 | 2.73895400  |
| C  | -2.96544800 | 1.54134000  | 4.00635000  |
| H  | -4.04565200 | 1.20768400  | 2.18231300  |
| C  | -1.86157200 | 1.18923600  | 4.77959400  |
| H  | -0.11653900 | -0.06594900 | 4.89744100  |
| H  | -3.66346300 | 2.29314400  | 4.36156600  |
| H  | -1.69473100 | 1.65850900  | 5.74438200  |
| C  | 0.51197900  | 3.96567100  | 0.22949300  |
| C  | 0.71348000  | 5.33564700  | 0.37820500  |
| C  | 0.42590300  | 5.95464700  | 1.59232900  |
| C  | -0.05870300 | 5.18008200  | 2.64274400  |
| C  | -0.26475700 | 3.80693000  | 2.48310200  |
| C  | 0.01405400  | 3.18250700  | 1.27004300  |
| C  | 0.88441500  | 3.50747600  | -1.16155100 |
| C  | 1.42000600  | 4.79875700  | -1.88688400 |
| C  | 1.22048800  | 5.96877800  | -0.89141700 |
| H  | 0.57801700  | 7.02294100  | 1.71763700  |
| H  | -0.28272400 | 5.64987500  | 3.59565900  |
| H  | -0.65508200 | 3.21484100  | 3.30536300  |
| H  | -0.16521200 | 2.11807600  | 1.13430100  |
| H  | 0.83590400  | 4.95131200  | -2.79466900 |
| H  | 2.16323700  | 6.51018600  | -0.75304800 |
| H  | 0.04540700  | 3.04842300  | -1.67801100 |
| H  | 0.50254200  | 6.69092000  | -1.29138400 |
| C  | 3.25988100  | 2.78199300  | -1.13619500 |
| C  | 1.83620100  | 1.12843800  | -0.90063500 |
| N  | 4.01220500  | 1.73562600  | -0.99189800 |
| N  | 1.93135900  | 2.45791000  | -1.10459200 |
| N  | 3.11200200  | 0.71751800  | -0.83832300 |
| C  | 3.64646900  | 4.20030900  | -1.38465400 |
| H  | 3.60060600  | 4.77336400  | -0.44727500 |
| H  | 4.65989100  | 4.24935600  | -1.78299300 |
| C  | 3.64745400  | -0.56045100 | -0.52774100 |
| C  | 3.81007000  | -1.53588300 | -1.51265000 |
| C  | 4.14960900  | -0.79136600 | 0.75562100  |
| C  | 4.38070800  | -2.76430100 | -1.20583900 |
| C  | 4.75598400  | -1.99935400 | 1.07298000  |
| C  | 4.84250800  | -2.97689800 | 0.08823900  |
| H  | 4.47868500  | -3.52940400 | -1.96567100 |
| H  | 5.12963900  | -2.17829600 | 2.07390700  |
| Cl | 3.31128500  | -1.20898000 | -3.13596200 |
| Cl | 5.55205300  | -4.50826500 | 0.48567600  |

|    |             |             |             |
|----|-------------|-------------|-------------|
| Cl | 3.95636900  | 0.40959000  | 1.97917100  |
| O  | 2.75734000  | 4.70287800  | -2.35462700 |
| C  | -4.66963200 | -1.69154200 | 0.47373600  |
| O  | -4.20793200 | -2.80492600 | 0.52968900  |
| C  | -6.10334500 | -1.37223600 | 0.12530300  |
| C  | -6.58608700 | 0.03160400  | 0.47779100  |
| H  | -6.72191400 | -2.14407500 | 0.59427900  |
| H  | -6.18107800 | -1.52593100 | -0.95893000 |
| C  | -8.01987600 | 0.25449900  | 0.00612500  |
| H  | -6.51216400 | 0.18817200  | 1.56022500  |
| H  | -5.92128500 | 0.76065600  | 0.00504000  |
| H  | -8.37258400 | 1.25581500  | 0.26525700  |
| H  | -8.08540100 | 0.14460600  | -1.08150600 |
| H  | -8.70443200 | -0.47099100 | 0.45698200  |

M7SS

|   |             |             |             |
|---|-------------|-------------|-------------|
| C | 0.64836300  | 0.37847900  | -1.00622200 |
| O | 0.02150400  | 1.38995500  | -1.45448600 |
| C | 0.02654600  | -1.03106400 | -1.29107300 |
| C | -1.13343000 | -1.09786800 | -2.27309800 |
| H | 0.75834200  | -1.83166400 | -1.42154500 |
| C | -1.39704700 | -2.55288900 | -2.66598800 |
| H | -0.90095400 | -0.51129800 | -3.16805500 |
| H | -0.51737900 | -2.96872700 | -3.16800700 |
| H | -2.25388600 | -2.64413300 | -3.33811900 |
| H | -1.60239900 | -3.16776100 | -1.78183900 |
| C | -0.52334300 | -0.91042900 | 0.14341700  |
| O | 0.50225300  | 0.03623600  | 0.50073800  |
| C | -1.86781000 | -0.23703300 | -0.07131300 |
| C | -2.32480300 | -0.40084800 | -1.52280900 |
| H | -2.39377000 | 0.61873300  | -1.91407600 |
| C | -0.59794300 | -2.15471200 | 1.01801800  |
| C | -1.63762600 | -2.36531000 | 1.93326700  |
| C | 0.39048800  | -3.13578600 | 0.91031000  |
| C | -1.66669100 | -3.51094300 | 2.72591900  |
| H | -2.43845900 | -1.63678000 | 2.02500400  |
| C | 0.36524100  | -4.28060900 | 1.69980900  |
| H | 1.18434100  | -3.01306900 | 0.18403200  |
| C | -0.66497500 | -4.47074200 | 2.61661000  |
| H | -2.48088500 | -3.65018200 | 3.42978500  |
| H | 1.14415400  | -5.03007700 | 1.58919300  |
| H | -0.69175500 | -5.36436100 | 3.23203500  |
| C | -3.66889600 | -1.06340300 | -1.74118900 |
| C | -4.45268600 | -0.68322500 | -2.83628300 |

|   |             |             |             |
|---|-------------|-------------|-------------|
| C | -4.14302300 | -2.07731000 | -0.90498600 |
| C | -5.67442800 | -1.30026200 | -3.09372100 |
| H | -4.09591400 | 0.10708300  | -3.49314700 |
| C | -5.36853500 | -2.69149500 | -1.15260000 |
| H | -3.55397800 | -2.37282000 | -0.04033000 |
| C | -6.13798300 | -2.30794700 | -2.24902100 |
| H | -6.26639100 | -0.99126700 | -3.95015500 |
| H | -5.72403500 | -3.46853900 | -0.48327400 |
| H | -7.09319500 | -2.78635500 | -2.44084700 |
| C | -2.51354300 | 0.58919800  | 0.76349300  |
| O | -3.71844200 | 1.09392400  | 0.23776900  |
| C | -2.15863900 | 1.16809700  | 2.07996400  |
| C | -1.07187600 | 0.74078200  | 2.85951000  |
| C | -2.93451600 | 2.23225700  | 2.56625600  |
| C | -0.79150500 | 1.34941500  | 4.07886500  |
| H | -0.42776400 | -0.05752100 | 2.52050000  |
| C | -2.64808300 | 2.84028200  | 3.78226900  |
| H | -3.76566900 | 2.59905500  | 1.97600500  |
| C | -1.57667700 | 2.39806900  | 4.55222400  |
| H | 0.05270600  | 0.99522800  | 4.66258500  |
| H | -3.26833500 | 3.66160500  | 4.12713800  |
| H | -1.35466300 | 2.86510100  | 5.50670600  |
| C | 1.78972000  | 3.81788200  | -0.20228600 |
| C | 2.37432500  | 5.07963400  | -0.13124200 |
| C | 2.20999100  | 5.85922100  | 1.01130600  |
| C | 1.45614300  | 5.35306200  | 2.06708800  |
| C | 0.86893700  | 4.08711400  | 1.98554400  |
| C | 1.02898800  | 3.30323300  | 0.84629800  |
| C | 2.08176000  | 3.15740500  | -1.53033900 |
| C | 3.06052000  | 4.14270400  | -2.27043800 |
| C | 3.11169400  | 5.42347800  | -1.40043500 |
| H | 2.66077400  | 6.84534000  | 1.07750800  |
| H | 1.32017700  | 5.95096100  | 2.96323600  |
| H | 0.27259800  | 3.70745800  | 2.81066500  |
| H | 0.56351500  | 2.32346200  | 0.77354300  |
| H | 2.66526300  | 4.35325500  | -3.26437000 |
| H | 4.15330100  | 5.71748400  | -1.22950200 |
| H | 1.17295000  | 2.95761700  | -2.09211800 |
| H | 2.63179100  | 6.25677600  | -1.92275400 |
| C | 4.07839700  | 1.73678100  | -1.16125000 |
| C | 2.18914100  | 0.62832400  | -1.07091400 |
| N | 4.43502700  | 0.52962400  | -0.84859500 |
| N | 2.72318900  | 1.83845100  | -1.32148500 |
| N | 3.24493500  | -0.14385300 | -0.78573300 |

|    |             |             |             |
|----|-------------|-------------|-------------|
| C  | 4.91298500  | 2.94710800  | -1.41221400 |
| H  | 4.92805700  | 3.58720300  | -0.51815000 |
| H  | 5.93406400  | 2.65683300  | -1.66001200 |
| C  | 3.29943100  | -1.49166700 | -0.34353300 |
| C  | 3.39242500  | -2.53654200 | -1.26425500 |
| C  | 3.42010500  | -1.76183300 | 1.02228000  |
| C  | 3.58091700  | -3.84507600 | -0.83800300 |
| C  | 3.62122000  | -3.06286900 | 1.46694500  |
| C  | 3.70448300  | -4.08344100 | 0.52703500  |
| H  | 3.64566800  | -4.65357800 | -1.55548000 |
| H  | 3.70256300  | -3.27203100 | 2.52643600  |
| Cl | 3.27170800  | -2.19857200 | -2.95629800 |
| Cl | 3.96263000  | -5.71035400 | 1.07382600  |
| Cl | 3.31187900  | -0.47807500 | 2.16528400  |
| O  | 4.35181600  | 3.60673500  | -2.52421400 |
| C  | -4.84826800 | 0.49885400  | 0.69795600  |
| O  | -4.85519800 | -0.27806200 | 1.61947300  |
| C  | -6.06619100 | 0.88862400  | -0.10069400 |
| C  | -5.90839200 | 2.07055500  | -1.05077000 |
| H  | -6.88045600 | 1.04787300  | 0.61387000  |
| H  | -6.32704500 | -0.01558800 | -0.66872800 |
| C  | -7.17586100 | 2.28621200  | -1.87166500 |
| H  | -5.66231900 | 2.97510400  | -0.48339500 |
| H  | -5.06043600 | 1.88027600  | -1.71514600 |
| H  | -7.06860500 | 3.13039900  | -2.55726700 |
| H  | -7.40163400 | 1.39385100  | -2.46523600 |
| H  | -8.03783200 | 2.48342900  | -1.22629200 |

TS8RR

|   |             |             |             |
|---|-------------|-------------|-------------|
| C | 1.02846300  | -0.02210000 | -1.46588700 |
| O | 1.69219300  | 0.05846200  | -2.48748100 |
| C | -0.25622500 | 0.67755200  | -1.01253000 |
| C | -1.23141600 | 0.79492000  | -2.19417400 |
| H | -0.18362000 | 1.58320400  | -0.41266900 |
| C | -1.39753700 | 2.22197800  | -2.70004200 |
| H | -0.81403700 | 0.19533800  | -3.01159000 |
| H | -0.43811800 | 2.59014900  | -3.07671600 |
| H | -2.12637100 | 2.26958300  | -3.51505600 |
| H | -1.73851000 | 2.89188100  | -1.90431900 |
| C | -0.58447300 | -0.66784600 | -0.29859200 |
| O | 0.55234700  | -1.28341100 | -0.98437700 |
| C | -1.96899700 | -1.03528100 | -0.82230200 |
| C | -2.51563700 | 0.06483400  | -1.72915400 |
| H | -3.01912400 | -0.39337700 | -2.58790400 |

|   |             |             |             |
|---|-------------|-------------|-------------|
| C | -0.44951000 | -0.82900900 | 1.21003300  |
| C | -1.50845400 | -0.51752900 | 2.07113600  |
| C | 0.70673100  | -1.38874400 | 1.75861700  |
| C | -1.38795600 | -0.72027200 | 3.44271300  |
| H | -2.45927500 | -0.18093500 | 1.66987500  |
| C | 0.82696000  | -1.59517800 | 3.12972700  |
| H | 1.50061300  | -1.70618400 | 1.09440100  |
| C | -0.21904400 | -1.25303700 | 3.98098300  |
| H | -2.22595500 | -0.47992200 | 4.08958200  |
| H | 1.73831000  | -2.03332400 | 3.52625000  |
| H | -0.13371900 | -1.41959000 | 5.05031200  |
| C | -3.52313300 | 0.98841300  | -1.06632100 |
| C | -4.80163900 | 1.12011400  | -1.60894900 |
| C | -3.20080500 | 1.75685200  | 0.05953400  |
| C | -5.74705900 | 1.96742400  | -1.03166300 |
| H | -5.06098300 | 0.54919100  | -2.49795900 |
| C | -4.13885500 | 2.60359800  | 0.63841800  |
| H | -2.20690800 | 1.69324600  | 0.49478400  |
| C | -5.42014300 | 2.70775700  | 0.09883800  |
| H | -6.73715700 | 2.04939500  | -1.47058300 |
| H | -3.86769300 | 3.18726400  | 1.51299800  |
| H | -6.15248400 | 3.36768900  | 0.55224600  |
| C | -2.67275500 | -2.11748600 | -0.47486500 |
| O | -3.99602900 | -2.20536000 | -0.93532600 |
| C | -2.21739000 | -3.28756700 | 0.30251500  |
| C | -0.93629900 | -3.81277200 | 0.10023900  |
| C | -3.06576200 | -3.89543300 | 1.23592000  |
| C | -0.50529000 | -4.91112500 | 0.83739100  |
| H | -0.28483900 | -3.35777600 | -0.63915100 |
| C | -2.63091600 | -4.99390300 | 1.96737700  |
| H | -4.05383000 | -3.48660900 | 1.41452300  |
| C | -1.34907100 | -5.50421700 | 1.77192100  |
| H | 0.49028100  | -5.31119500 | 0.67215200  |
| H | -3.29331400 | -5.44942800 | 2.69648600  |
| H | -1.01307300 | -6.36362100 | 2.34360400  |
| C | -4.96380000 | -1.66077500 | -0.15118900 |
| O | -4.74524600 | -1.16733600 | 0.92532700  |
| C | -6.33639400 | -1.78802900 | -0.76892800 |
| C | -6.39435300 | -2.28733400 | -2.20890600 |
| H | -6.90895000 | -2.45192300 | -0.10921500 |
| H | -6.79545400 | -0.79819200 | -0.67007300 |
| C | -7.82746700 | -2.29943500 | -2.73254700 |
| H | -5.96054200 | -3.29022000 | -2.26403000 |
| H | -5.76718900 | -1.65093100 | -2.84230900 |



|       |             |             |             |
|-------|-------------|-------------|-------------|
| H     | -7.87022700 | -2.66129900 | -3.76237100 |
| H     | -8.26103300 | -1.29439200 | -2.70971700 |
| H     | -8.46257600 | -2.94808900 | -2.12121100 |
| C     | 4.85265600  | -1.38033800 | -1.43895800 |
| C     | 5.92242300  | -2.24053500 | -1.20443700 |
| C     | 6.98448600  | -2.29300200 | -2.10181500 |
| C     | 6.95372600  | -1.46982800 | -3.22563900 |
| C     | 5.87496900  | -0.61241600 | -3.45397000 |
| C     | 4.80588000  | -0.55991500 | -2.56166600 |
| C     | 3.82284200  | -1.49124900 | -0.33341100 |
| C     | 4.55454300  | -2.31570500 | 0.78715200  |
| C     | 5.71791500  | -3.02855000 | 0.06485400  |
| H     | 7.82474500  | -2.95840800 | -1.92640200 |
| H     | 7.77769800  | -1.49536200 | -3.93187600 |
| H     | 5.86767700  | 0.01635000  | -4.33832500 |
| H     | 3.94533700  | 0.08176700  | -2.73196200 |
| H     | 3.86621300  | -3.02219300 | 1.25522600  |
| H     | 6.59818800  | -3.05672200 | 0.71375000  |
| H     | 2.90818100  | -1.98654700 | -0.67479000 |
| H     | 5.44580800  | -4.06531600 | -0.16212700 |
| C     | 4.27802200  | 0.52001700  | 1.00908000  |
| C     | 2.30799900  | 0.51667900  | -0.02295200 |
| N     | 3.76891300  | 1.67013700  | 1.32381200  |
| N     | 3.43462100  | -0.18858400 | 0.19036800  |
| N     | 2.55942500  | 1.64683100  | 0.65913000  |
| C     | 5.47826200  | -0.21309500 | 1.51205300  |
| H     | 6.26929900  | -0.25378500 | 0.75180900  |
| H     | 5.86616100  | 0.25682300  | 2.41544200  |
| C     | 1.66653500  | 2.74455400  | 0.73709500  |
| C     | 0.85574300  | 2.91787300  | 1.86154800  |
| C     | 1.50014500  | 3.59751000  | -0.35730500 |
| C     | -0.12923600 | 3.89853300  | 1.88687100  |
| C     | 0.51955400  | 4.58189000  | -0.35443800 |
| C     | -0.28879400 | 4.70898600  | 0.76923900  |
| H     | -0.76485600 | 4.01299300  | 2.75643600  |
| H     | 0.38343300  | 5.22427100  | -1.21568700 |
| Cl    | 1.03603800  | 1.86334800  | 3.21327800  |
| Cl    | -1.53894700 | 5.91514700  | 0.77490800  |
| Cl    | 2.48481300  | 3.39267500  | -1.76386300 |
| O     | 5.01525300  | -1.50849000 | 1.86483500  |
| TS8RS |             |             |             |
| C     | 0.64919600  | -0.02704400 | -1.35353300 |
| O     | 1.04433400  | -0.17382900 | -2.49677600 |

|   |             |             |             |
|---|-------------|-------------|-------------|
| C | -0.32359300 | 0.98392400  | -0.72185500 |
| C | -1.50594600 | 1.29476200  | -1.64704800 |
| H | 0.09034000  | 1.86461500  | -0.22786200 |
| C | -1.59364900 | 2.75841500  | -2.05498600 |
| H | -1.39673300 | 0.68414400  | -2.55199100 |
| H | -0.70546900 | 3.05368700  | -2.62175600 |
| H | -2.47405600 | 2.93720800  | -2.67998300 |
| H | -1.66482000 | 3.40131400  | -1.16977100 |
| C | -0.74348800 | -0.20469700 | 0.17936000  |
| O | 0.07214500  | -1.11152100 | -0.61273700 |
| C | -2.24296000 | -0.35871800 | -0.03451000 |
| C | -2.75454200 | 0.79611100  | -0.87531700 |
| H | -3.06191000 | 1.59102000  | -0.17693600 |
| C | -0.34504300 | -0.18320900 | 1.63982500  |
| C | -1.01947100 | 0.66541700  | 2.52279100  |
| C | 0.63460400  | -1.04065000 | 2.13673400  |
| C | -0.71659100 | 0.65084500  | 3.87981500  |
| H | -1.81734300 | 1.30437400  | 2.15041200  |
| C | 0.93977700  | -1.05477800 | 3.49589600  |
| H | 1.12354600  | -1.72714700 | 1.45391600  |
| C | 0.26385700  | -0.21084400 | 4.37153500  |
| H | -1.25403100 | 1.30726600  | 4.55722700  |
| H | 1.70020900  | -1.73576800 | 3.86631800  |
| H | 0.49370200  | -0.22611600 | 5.43240300  |
| C | -3.91433400 | 0.50964800  | -1.80239800 |
| C | -5.02145800 | 1.35824900  | -1.84374300 |
| C | -3.86188300 | -0.57201500 | -2.68872000 |
| C | -6.05508400 | 1.13930700  | -2.75549000 |
| H | -5.07253500 | 2.19511900  | -1.15049000 |
| C | -4.88737200 | -0.79053500 | -3.60161000 |
| H | -3.00606500 | -1.24269300 | -2.65554500 |
| C | -5.98817900 | 0.06688100  | -3.63945700 |
| H | -6.90907200 | 1.80977500  | -2.77473000 |
| H | -4.83099500 | -1.63249800 | -4.28435600 |
| H | -6.78893800 | -0.10476200 | -4.35173800 |
| C | -2.97543200 | -1.29339900 | 0.57800000  |
| O | -4.36587300 | -1.30652400 | 0.49083100  |
| C | -2.45065700 | -2.40973000 | 1.39405400  |
| C | -1.48747400 | -3.28487600 | 0.88710900  |
| C | -2.92102600 | -2.57820100 | 2.70023800  |
| C | -0.98945900 | -4.30929000 | 1.68816700  |
| H | -1.12856700 | -3.14625900 | -0.12759300 |
| C | -2.41436500 | -3.59513200 | 3.49951700  |
| H | -3.66349000 | -1.88778400 | 3.09089800  |

|   |             |             |             |
|---|-------------|-------------|-------------|
| C | -1.44772600 | -4.46397000 | 2.99352700  |
| H | -0.24597800 | -4.99248900 | 1.28871600  |
| H | -2.77057800 | -3.71046700 | 4.51809500  |
| H | -1.05672600 | -5.26175000 | 3.61718900  |
| C | -5.07303200 | -0.23030000 | 0.92397700  |
| O | -4.57837300 | 0.70260500  | 1.50526500  |
| C | -6.54452100 | -0.36830500 | 0.61298800  |
| C | -6.90407400 | -1.43176700 | -0.42044400 |
| H | -7.05548100 | -0.55382300 | 1.56625600  |
| H | -6.86965500 | 0.62369700  | 0.28126900  |
| C | -8.35750800 | -1.30454300 | -0.86430300 |
| H | -6.71642500 | -2.42514600 | -0.00108400 |
| H | -6.24118500 | -1.32830100 | -1.28456300 |
| H | -8.61809100 | -2.08084800 | -1.58803900 |
| H | -8.52939300 | -0.33261200 | -1.33882400 |
| H | -9.04470900 | -1.38993900 | -0.01611000 |
| C | 3.85508200  | -2.42003000 | -1.76169400 |
| C | 4.70292200  | -3.51416300 | -1.61366800 |
| C | 5.54282900  | -3.88976400 | -2.65861700 |
| C | 5.51448700  | -3.15255400 | -3.84061100 |
| C | 4.65482500  | -2.06044100 | -3.98137900 |
| C | 3.81055800  | -1.68196200 | -2.94033300 |
| C | 3.04921600  | -2.17915900 | -0.50311000 |
| C | 3.69869900  | -3.13927300 | 0.56153900  |
| C | 4.53772600  | -4.14913400 | -0.25565400 |
| H | 6.21244700  | -4.73846100 | -2.55385700 |
| H | 6.16692400  | -3.43076600 | -4.66233800 |
| H | 4.64260500  | -1.50324700 | -4.91244900 |
| H | 3.11689600  | -0.85054700 | -3.03681000 |
| H | 2.92298100  | -3.63471300 | 1.14867600  |
| H | 5.48498700  | -4.34454800 | 0.25656400  |
| H | 1.98485200  | -2.38749200 | -0.64434100 |
| H | 4.00989800  | -5.10561500 | -0.33530100 |
| C | 4.28509100  | -0.34534200 | 0.58106800  |
| C | 2.29803000  | 0.23136700  | -0.23446400 |
| N | 4.21857700  | 0.92688800  | 0.81621800  |
| N | 3.15568300  | -0.79304800 | -0.05736800 |
| N | 2.98570000  | 1.25931700  | 0.29020900  |
| C | 5.26282200  | -1.38493900 | 1.02048700  |
| H | 5.90518100  | -1.70613300 | 0.18933200  |
| H | 5.88429500  | -1.00832200 | 1.83261600  |
| C | 2.52894400  | 2.59802900  | 0.35977900  |
| C | 2.17652800  | 3.16186200  | 1.58916700  |
| C | 2.38005500  | 3.36107600  | -0.80205700 |

|    |            |             |             |
|----|------------|-------------|-------------|
| C  | 1.68902500 | 4.46083900  | 1.66618700  |
| C  | 1.88164700 | 4.65733300  | -0.74765100 |
| C  | 1.54686400 | 5.18888800  | 0.49147500  |
| H  | 1.41350300 | 4.88575900  | 2.62329600  |
| H  | 1.76274500 | 5.23606100  | -1.65533400 |
| Cl | 2.28928600 | 2.21684300  | 3.02768700  |
| Cl | 0.92656800 | 6.80914600  | 0.57485100  |
| Cl | 2.78764500 | 2.68426900  | -2.33943800 |
| O  | 4.48331900 | -2.45540900 | 1.52954500  |

TS8SR

|   |             |             |             |
|---|-------------|-------------|-------------|
| C | 0.62058300  | 0.00159200  | -1.26519500 |
| O | 0.88472500  | -0.16172200 | -2.44888200 |
| C | -0.22224800 | 1.07769300  | -0.54022600 |
| C | -1.41008600 | 1.66958300  | -1.29635800 |
| H | 0.35003800  | 1.83276200  | -0.00030900 |
| C | -1.07518700 | 2.29210900  | -2.64529500 |
| H | -1.83551700 | 2.44409900  | -0.64128500 |
| H | -1.98149900 | 2.68196100  | -3.11907200 |
| H | -0.36978500 | 3.12050800  | -2.52406900 |
| H | -0.61348600 | 1.54834800  | -3.29837000 |
| C | -0.75102100 | -0.11439700 | 0.29759000  |
| O | 0.02810500  | -1.05704900 | -0.48193800 |
| C | -2.20647000 | -0.28097600 | -0.10598800 |
| C | -2.45983500 | 0.53088300  | -1.36919100 |
| H | -2.19589400 | -0.11170400 | -2.22279800 |
| C | -0.42006200 | -0.11804900 | 1.76659100  |
| C | -1.01081600 | 0.83424900  | 2.60119800  |
| C | 0.46435000  | -1.04755000 | 2.30902800  |
| C | -0.73520500 | 0.84308700  | 3.96331700  |
| H | -1.70909500 | 1.55473900  | 2.17987500  |
| C | 0.73961700  | -1.04054200 | 3.67477800  |
| H | 0.91364000  | -1.78957000 | 1.65642900  |
| C | 0.13887400  | -0.09896400 | 4.50546700  |
| H | -1.20449900 | 1.58255200  | 4.60493600  |
| H | 1.42224000  | -1.77715400 | 4.08752500  |
| H | 0.34919100  | -0.09707800 | 5.57041300  |
| C | -3.85417200 | 1.07474900  | -1.58326300 |
| C | -4.51354200 | 0.88991200  | -2.79988300 |
| C | -4.48027100 | 1.84024800  | -0.59334500 |
| C | -5.76644600 | 1.45776900  | -3.02864700 |
| H | -4.03689900 | 0.29646100  | -3.57614900 |
| C | -5.72823900 | 2.41272300  | -0.81824100 |
| H | -3.99393800 | 1.96620200  | 0.37108400  |

|   |             |             |             |
|---|-------------|-------------|-------------|
| C | -6.37482500 | 2.22733000  | -2.04044700 |
| H | -6.26149700 | 1.30316900  | -3.98255200 |
| H | -6.20077100 | 2.99735400  | -0.03517100 |
| H | -7.34779700 | 2.67512200  | -2.21661000 |
| C | -3.02635800 | -1.16958200 | 0.45212600  |
| O | -4.26272600 | -1.39889700 | -0.16363300 |
| C | -2.66254900 | -2.10832500 | 1.54939500  |
| C | -1.90294400 | -3.23601900 | 1.22534700  |
| C | -3.01102000 | -1.86711100 | 2.88067300  |
| C | -1.49473500 | -4.11640200 | 2.22356500  |
| H | -1.61812100 | -3.40140500 | 0.19044700  |
| C | -2.58692900 | -2.74041300 | 3.87670600  |
| H | -3.59487400 | -0.98608000 | 3.12068900  |
| C | -1.83128800 | -3.86551300 | 3.55097000  |
| H | -0.90564000 | -4.99122100 | 1.96561800  |
| H | -2.84132300 | -2.53828800 | 4.91242100  |
| H | -1.50265900 | -4.54367000 | 4.33255800  |
| C | -5.37044800 | -0.92894800 | 0.45517100  |
| O | -5.34493800 | -0.38827300 | 1.53275900  |
| C | -6.60864600 | -1.10464700 | -0.38679500 |
| C | -6.48885800 | -2.01318300 | -1.60614700 |
| H | -7.40729900 | -1.43381300 | 0.28628500  |
| H | -6.87683200 | -0.08823200 | -0.70516600 |
| C | -7.76975100 | -1.98291800 | -2.43461700 |
| H | -6.26267700 | -3.03624800 | -1.28690100 |
| H | -5.64410400 | -1.67971000 | -2.21597900 |
| H | -7.69632700 | -2.63790900 | -3.30614600 |
| H | -7.96798700 | -0.96623300 | -2.79090700 |
| H | -8.63363800 | -2.30374700 | -1.84383700 |
| C | 3.52630600  | -2.69332800 | -1.85408800 |
| C | 4.29761500  | -3.84755400 | -1.75365000 |
| C | 5.06593700  | -4.26638900 | -2.83691500 |
| C | 5.04316600  | -3.51141800 | -4.00762400 |
| C | 4.25805300  | -2.35941600 | -4.10083300 |
| C | 3.48538800  | -1.93723000 | -3.02178000 |
| C | 2.78774700  | -2.41290200 | -0.56370600 |
| C | 3.37753100  | -3.45513000 | 0.45829500  |
| C | 4.13826100  | -4.49346100 | -0.40051500 |
| H | 5.67482900  | -5.16337700 | -2.77101100 |
| H | 5.64080900  | -3.82294700 | -4.85859100 |
| H | 4.24740100  | -1.79051200 | -5.02480400 |
| H | 2.84683500  | -1.05845800 | -3.07975200 |
| H | 2.57108800  | -3.91579600 | 1.03127600  |
| H | 5.08885800  | -4.74640200 | 0.07998700  |

|    |            |             |             |
|----|------------|-------------|-------------|
| H  | 1.70518800 | -2.51709500 | -0.66926500 |
| H  | 3.56016800 | -5.42040500 | -0.47675700 |
| C  | 4.21192700 | -0.72811600 | 0.54131500  |
| C  | 2.30922100 | 0.06770000  | -0.28044600 |
| N  | 4.28656800 | 0.54360300  | 0.77801600  |
| N  | 3.03974100 | -1.04943200 | -0.09622900 |
| N  | 3.10170700 | 1.01253000  | 0.24891000  |
| C  | 5.08590400 | -1.86253200 | 0.96261600  |
| H  | 5.69985500 | -2.22156900 | 0.12500300  |
| H  | 5.73707300 | -1.55946200 | 1.78225000  |
| C  | 2.81374400 | 2.39819000  | 0.31048000  |
| C  | 2.50781100 | 2.99978700  | 1.53459800  |
| C  | 2.80458200 | 3.17620800  | -0.85073100 |
| C  | 2.21115000 | 4.35515700  | 1.60882600  |
| C  | 2.49888500 | 4.53104400  | -0.79837800 |
| C  | 2.21221600 | 5.10072100  | 0.43602600  |
| H  | 1.97260600 | 4.81225200  | 2.56108400  |
| H  | 2.49037700 | 5.12583900  | -1.70323200 |
| Cl | 2.43575100 | 2.03761400  | 2.96471400  |
| Cl | 1.83622600 | 6.79419300  | 0.51383100  |
| Cl | 3.15607600 | 2.45143400  | -2.37964700 |
| O  | 4.21201600 | -2.86700900 | 1.44720300  |

TS8SS

|   |             |             |             |
|---|-------------|-------------|-------------|
| C | 0.73753200  | -0.11207700 | -1.42034700 |
| O | 1.24954600  | -0.38072100 | -2.50014300 |
| C | -0.32642500 | 0.92437200  | -0.97076900 |
| C | -1.53188000 | 1.14102400  | -1.91961400 |
| H | 0.05326100  | 1.85830800  | -0.55332300 |
| C | -1.40911200 | 0.43444700  | -3.26996100 |
| H | -1.63704000 | 2.21229700  | -2.11940700 |
| H | -2.29031400 | 0.63920800  | -3.88239000 |
| H | -0.51689400 | 0.78149100  | -3.79254500 |
| H | -1.30600500 | -0.64780400 | -3.15106800 |
| C | -0.72893100 | -0.17483600 | 0.04936900  |
| O | 0.10775300  | -1.14140900 | -0.62892600 |
| C | -2.22382900 | -0.37775600 | -0.13174900 |
| C | -2.76324700 | 0.68944500  | -1.06040800 |
| H | -3.02916800 | 1.54177900  | -0.41639600 |
| C | -0.35138400 | 0.00857200  | 1.50649800  |
| C | -1.02946600 | 0.96157300  | 2.27288500  |
| C | 0.57003500  | -0.83056700 | 2.12954500  |
| C | -0.79859300 | 1.05726700  | 3.64056900  |
| H | -1.78609500 | 1.58862300  | 1.80670300  |

|   |             |             |             |
|---|-------------|-------------|-------------|
| C | 0.80355600  | -0.73454500 | 3.49954300  |
| H | 1.05961600  | -1.59770500 | 1.53910600  |
| C | 0.11526500  | 0.20568000  | 4.26034600  |
| H | -1.34277900 | 1.79153900  | 4.22657300  |
| H | 1.51386200  | -1.40890900 | 3.96884700  |
| H | 0.28624000  | 0.27477300  | 5.33021200  |
| C | -3.99984100 | 0.33007200  | -1.85623500 |
| C | -5.04461500 | 1.24827100  | -1.97335400 |
| C | -4.11379100 | -0.89725700 | -2.52120600 |
| C | -6.16729200 | 0.96421900  | -2.75206100 |
| H | -4.97748900 | 2.19614600  | -1.44387900 |
| C | -5.22094900 | -1.17666900 | -3.31410700 |
| H | -3.32652100 | -1.63718100 | -2.40761600 |
| C | -6.25301100 | -0.24513700 | -3.43432500 |
| H | -6.96931100 | 1.69228600  | -2.82818700 |
| H | -5.28686800 | -2.12989200 | -3.82934900 |
| H | -7.12176200 | -0.46871400 | -4.04540500 |
| C | -2.93234300 | -1.23127800 | 0.61416400  |
| O | -4.32615700 | -1.22258300 | 0.62158000  |
| C | -2.35298000 | -2.25195400 | 1.51344100  |
| C | -1.44532100 | -3.19554700 | 1.02742500  |
| C | -2.67878900 | -2.23793400 | 2.87337500  |
| C | -0.85489000 | -4.10697700 | 1.89936600  |
| H | -1.19609800 | -3.19339500 | -0.02875100 |
| C | -2.07721100 | -3.13956500 | 3.74233100  |
| H | -3.37507000 | -1.49182400 | 3.24645900  |
| C | -1.16337800 | -4.07518100 | 3.25645700  |
| H | -0.15432100 | -4.84316100 | 1.51659700  |
| H | -2.31444700 | -3.11082300 | 4.80100000  |
| H | -0.69836900 | -4.78142600 | 3.93727100  |
| C | -4.96839100 | -0.08685400 | 1.00463500  |
| O | -4.40354900 | 0.87817300  | 1.45489700  |
| C | -6.46387700 | -0.19174900 | 0.82517000  |
| C | -6.95372700 | -1.35910700 | -0.02471400 |
| H | -6.90227300 | -0.22035600 | 1.83077200  |
| H | -6.77206900 | 0.76375700  | 0.38622300  |
| C | -8.43865000 | -1.22630300 | -0.34612200 |
| H | -6.75620500 | -2.30025500 | 0.49805700  |
| H | -6.37503100 | -1.38926800 | -0.95163700 |
| H | -8.79143600 | -2.07499700 | -0.93741800 |
| H | -8.62564000 | -0.31451900 | -0.92329400 |
| H | -9.04317500 | -1.17633800 | 0.56546300  |
| C | 3.90002100  | -2.52361500 | -1.53643100 |
| C | 4.65911000  | -3.65494300 | -1.24408300 |

|    |            |             |             |
|----|------------|-------------|-------------|
| C  | 5.54720400 | -4.16270100 | -2.18704500 |
| C  | 5.66185300 | -3.51626600 | -3.41616000 |
| C  | 4.89504500 | -2.38444700 | -3.70173800 |
| C  | 3.99870400 | -1.87556900 | -2.76305200 |
| C  | 3.01777300 | -2.15515700 | -0.36039300 |
| C  | 3.59555300 | -3.00955800 | 0.82399600  |
| C  | 4.35135100 | -4.16762700 | 0.14064900  |
| H  | 6.14585400 | -5.04144700 | -1.96576300 |
| H  | 6.35590800 | -3.89616900 | -4.15932400 |
| H  | 4.99625200 | -1.89814700 | -4.66659900 |
| H  | 3.37485000 | -1.01117000 | -2.97250300 |
| H  | 2.79136200 | -3.36783400 | 1.47054800  |
| H  | 5.23822500 | -4.43210000 | 0.72344200  |
| H  | 1.96553800 | -2.38488300 | -0.54540500 |
| H  | 3.71332400 | -5.05733400 | 0.09085900  |
| C  | 4.22744400 | -0.23866000 | 0.57586200  |
| C  | 2.23524500 | 0.26926000  | -0.26436800 |
| N  | 4.15020800 | 1.04463500  | 0.73165000  |
| N  | 3.10276200 | -0.73560400 | -0.03202500 |
| N  | 2.91221300 | 1.33580200  | 0.19183000  |
| C  | 5.21150200 | -1.24061000 | 1.08402500  |
| H  | 5.84385800 | -1.62655400 | 0.27394000  |
| H  | 5.84112700 | -0.79776100 | 1.85552900  |
| C  | 2.45918100 | 2.67840400  | 0.19837100  |
| C  | 2.16560800 | 3.31780900  | 1.40654400  |
| C  | 2.29392300 | 3.38300600  | -0.99797300 |
| C  | 1.71945700 | 4.63368100  | 1.42793300  |
| C  | 1.83908800 | 4.69599800  | -0.99750000 |
| C  | 1.56257400 | 5.30328600  | 0.22098400  |
| H  | 1.49177800 | 5.11828400  | 2.36916900  |
| H  | 1.70931900 | 5.22968900  | -1.93063600 |
| Cl | 2.31163400 | 2.45567900  | 2.89310700  |
| Cl | 0.99933800 | 6.94645400  | 0.23476000  |
| Cl | 2.62132100 | 2.60730000  | -2.50621300 |
| O  | 4.44217100 | -2.26571300 | 1.69349200  |

M8RR

|   |             |             |             |
|---|-------------|-------------|-------------|
| C | -2.25589600 | -2.32270700 | -1.94684500 |
| O | -2.84686200 | -3.01493400 | -2.71700300 |
| C | -1.19581000 | -2.47672000 | -0.87837700 |
| C | 0.21291600  | -2.57138000 | -1.51203000 |
| H | -1.38869000 | -3.18335200 | -0.06952700 |
| C | 0.90749900  | -3.90244900 | -1.25693700 |
| H | 0.10027700  | -2.45124100 | -2.59635200 |



|   |             |             |             |
|---|-------------|-------------|-------------|
| H | 0.33900300  | -4.71775600 | -1.71202400 |
| H | 1.91279700  | -3.90267200 | -1.68843700 |
| H | 1.00188300  | -4.09892900 | -0.18566400 |
| C | -1.47206200 | -0.96738100 | -0.62145200 |
| O | -2.34128600 | -0.96570400 | -1.82622600 |
| C | -0.14166100 | -0.27594000 | -0.80430600 |
| C | 0.96556800  | -1.30394900 | -1.01282400 |
| H | 1.64302700  | -0.95214800 | -1.79865600 |
| C | -2.28976100 | -0.61553800 | 0.60500100  |
| C | -1.72798900 | 0.03949400  | 1.70545600  |
| C | -3.63171900 | -1.00679300 | 0.65921500  |
| C | -2.49770200 | 0.28691900  | 2.83934500  |
| H | -0.69380700 | 0.37214600  | 1.67866500  |
| C | -4.39547300 | -0.75678000 | 1.79427500  |
| H | -4.09182800 | -1.49389400 | -0.19465900 |
| C | -3.83017100 | -0.10990100 | 2.89015300  |
| H | -2.04882600 | 0.80199800  | 3.68247800  |
| H | -5.43645500 | -1.06292600 | 1.81755500  |
| H | -4.42695300 | 0.09068600  | 3.77415900  |
| C | 1.80842000  | -1.54963000 | 0.22509300  |
| C | 3.19979800  | -1.51820100 | 0.13152200  |
| C | 1.22716800  | -1.82700400 | 1.46674300  |
| C | 3.99882200  | -1.73042100 | 1.25479000  |
| H | 3.66457000  | -1.32555400 | -0.83293300 |
| C | 2.01948300  | -2.04000000 | 2.58833900  |
| H | 0.14473800  | -1.85801700 | 1.56600400  |
| C | 3.40938900  | -1.98544100 | 2.48793400  |
| H | 5.08016500  | -1.69440500 | 1.16213700  |
| H | 1.55120700  | -2.24156100 | 3.54648500  |
| H | 4.02594600  | -2.14475600 | 3.36662500  |
| C | 0.09237900  | 1.04087400  | -0.72992800 |
| O | 1.43263400  | 1.44317900  | -0.79922600 |
| C | -0.87950400 | 2.14806700  | -0.62738500 |
| C | -2.11289500 | 2.07712600  | -1.28547100 |
| C | -0.57260500 | 3.29186800  | 0.12137300  |
| C | -3.03007400 | 3.11619400  | -1.17186000 |
| H | -2.34875500 | 1.21654300  | -1.90050500 |
| C | -1.49258300 | 4.32737900  | 0.23057100  |
| H | 0.37336100  | 3.36126500  | 0.64526500  |
| C | -2.72530200 | 4.24227900  | -0.41274700 |
| H | -3.98197200 | 3.04685100  | -1.68804800 |
| H | -1.24602900 | 5.20255500  | 0.82284300  |
| H | -3.44211300 | 5.05253400  | -0.32656500 |
| C | 2.11491200  | 1.53202700  | 0.37648400  |

|   |            |            |             |
|---|------------|------------|-------------|
| O | 1.59707800 | 1.36847100 | 1.45113900  |
| C | 3.56206000 | 1.90689000 | 0.17097500  |
| C | 4.07863100 | 1.87543700 | -1.26360200 |
| H | 3.68164500 | 2.90962000 | 0.60044800  |
| H | 4.13543500 | 1.23257500 | 0.81616100  |
| C | 5.56543200 | 2.21346300 | -1.32158300 |
| H | 3.50407500 | 2.57903100 | -1.87331000 |
| H | 3.90208400 | 0.88358200 | -1.69348100 |
| H | 5.93478500 | 2.19967600 | -2.34946500 |
| H | 6.15321300 | 1.49466100 | -0.74180800 |
| H | 5.75708000 | 3.20870800 | -0.90840300 |

M8RS

|   |             |             |             |
|---|-------------|-------------|-------------|
| C | 1.75319400  | 2.98549800  | -1.14788000 |
| O | 2.02558400  | 3.93460800  | -1.81546200 |
| C | 1.14330500  | 2.69844800  | 0.20793800  |
| C | -0.39351800 | 2.82877500  | 0.19253200  |
| H | 1.63340100  | 3.13283400  | 1.08022400  |
| C | -0.93767000 | 3.86655700  | 1.16343700  |
| H | -0.71477000 | 3.09674100  | -0.82223700 |
| H | -0.57884300 | 4.86725200  | 0.91006400  |
| H | -2.03111500 | 3.87727500  | 1.13540100  |
| H | -0.62272800 | 3.63598900  | 2.18662300  |
| C | 1.47692600  | 1.22260700  | -0.14495600 |
| O | 1.88393000  | 1.67030900  | -1.49501000 |
| C | 0.16263000  | 0.47463900  | -0.09171700 |
| C | -0.90241600 | 1.39395000  | 0.48436900  |
| H | -0.88244900 | 1.25214700  | 1.57673000  |
| C | 2.63651600  | 0.60576200  | 0.60104100  |
| C | 2.39955600  | -0.09222500 | 1.78920700  |
| C | 3.94711000  | 0.79063500  | 0.16148700  |
| C | 3.46632700  | -0.59212800 | 2.52765600  |
| H | 1.37853800  | -0.26438500 | 2.12252100  |
| C | 5.01151500  | 0.28214700  | 0.90246800  |
| H | 4.13344600  | 1.31444100  | -0.76983600 |
| C | 4.77542800  | -0.40623100 | 2.08795000  |
| H | 3.27233600  | -1.13551600 | 3.44696400  |
| H | 6.02710000  | 0.42247100  | 0.54625000  |
| H | 5.60581200  | -0.80255800 | 2.66356900  |
| C | -2.32652700 | 1.20467400  | 0.01183500  |
| C | -3.37317500 | 1.14463800  | 0.93299600  |
| C | -2.62700000 | 1.16392100  | -1.35422800 |
| C | -4.69726500 | 1.05332900  | 0.50323500  |
| H | -3.14433600 | 1.16551500  | 1.99625100  |

|   |             |             |             |
|---|-------------|-------------|-------------|
| C | -3.94602300 | 1.07875900  | -1.78604200 |
| H | -1.81551800 | 1.19566100  | -2.07801700 |
| C | -4.98659700 | 1.02532500  | -0.85756700 |
| H | -5.49983600 | 1.00771500  | 1.23320100  |
| H | -4.16433200 | 1.04990700  | -2.84884200 |
| H | -6.01548000 | 0.95666200  | -1.19600200 |
| C | 0.03686100  | -0.83961700 | -0.32436300 |
| O | -1.16674200 | -1.49276700 | -0.07603500 |
| C | 1.06995800  | -1.75911500 | -0.84142600 |
| C | 1.93639700  | -1.38104100 | -1.87047400 |
| C | 1.18756900  | -3.03475500 | -0.27674800 |
| C | 2.92260300  | -2.25872000 | -2.30945100 |
| H | 1.83093500  | -0.40454200 | -2.32980400 |
| C | 2.17606200  | -3.90649600 | -0.71571300 |
| H | 0.51107300  | -3.33319200 | 0.51848000  |
| C | 3.04679500  | -3.51955800 | -1.73300100 |
| H | 3.58925400  | -1.95746000 | -3.11085100 |
| H | 2.26902400  | -4.88873700 | -0.26384100 |
| H | 3.81603000  | -4.20272900 | -2.07856200 |
| C | -1.66468900 | -1.51811600 | 1.18897200  |
| O | -1.07145800 | -1.08420800 | 2.14441100  |
| C | -3.01909800 | -2.18099400 | 1.24294900  |
| C | -3.73512600 | -2.32920500 | -0.09662800 |
| H | -2.87522000 | -3.15666600 | 1.72439800  |
| H | -3.61354400 | -1.58214700 | 1.94107000  |
| C | -5.18871300 | -2.74802000 | 0.09551300  |
| H | -3.20344300 | -3.05939400 | -0.71448900 |
| H | -3.69053400 | -1.37635500 | -0.63179800 |
| H | -5.68940500 | -2.88372300 | -0.86620300 |
| H | -5.73745000 | -1.98275300 | 0.65450800  |
| H | -5.26406500 | -3.68864500 | 0.65066700  |

M8SR

|   |             |            |             |
|---|-------------|------------|-------------|
| C | 1.41470500  | 2.96576100 | -1.55683600 |
| O | 1.40420000  | 3.80648200 | -2.40302100 |
| C | 1.03029700  | 2.84114800 | -0.09025100 |
| C | -0.46170400 | 2.88653200 | 0.24037800  |
| H | 1.66416500  | 3.43293500 | 0.57253200  |
| C | -1.18470900 | 4.13647300 | -0.24107100 |
| H | -0.54559800 | 2.81473300 | 1.33295200  |
| H | -2.25107300 | 4.06910200 | -0.00680200 |
| H | -0.78459300 | 5.03373200 | 0.23791200  |
| H | -1.07112400 | 4.25250600 | -1.32314200 |
| C | 1.43520700  | 1.36001900 | -0.29685500 |

|   |             |             |             |
|---|-------------|-------------|-------------|
| O | 1.81083400  | 1.66715200  | -1.69156500 |
| C | 0.12916900  | 0.59194900  | -0.30073900 |
| C | -1.03677400 | 1.57130200  | -0.35118000 |
| H | -1.26891900 | 1.75312300  | -1.41239800 |
| C | 2.58089700  | 0.81390500  | 0.50427700  |
| C | 2.42292900  | 0.67057900  | 1.88445700  |
| C | 3.77954300  | 0.44111200  | -0.09747100 |
| C | 3.45193300  | 0.14336500  | 2.65546400  |
| H | 1.48360700  | 0.95833100  | 2.35220600  |
| C | 4.80646700  | -0.09446000 | 0.67644800  |
| H | 3.89235700  | 0.54800500  | -1.17094900 |
| C | 4.64586300  | -0.24616000 | 2.05035400  |
| H | 3.32087100  | 0.03111400  | 3.72702300  |
| H | 5.73241300  | -0.40013400 | 0.19956900  |
| H | 5.44737800  | -0.66602200 | 2.64965100  |
| C | -2.31753600 | 1.16961700  | 0.34744100  |
| C | -3.55016800 | 1.30885200  | -0.29300400 |
| C | -2.29635700 | 0.72683600  | 1.67400900  |
| C | -4.73907200 | 1.01988300  | 0.37593300  |
| H | -3.57776000 | 1.64964600  | -1.32508100 |
| C | -3.48008900 | 0.43690600  | 2.34531300  |
| H | -1.34131300 | 0.57836200  | 2.17216800  |
| C | -4.70722100 | 0.58885500  | 1.69967400  |
| H | -5.68862100 | 1.13645600  | -0.13709400 |
| H | -3.44383000 | 0.08535900  | 3.37144900  |
| H | -5.63078700 | 0.36565800  | 2.22411200  |
| C | 0.05408100  | -0.73396100 | -0.41773000 |
| O | -1.20868100 | -1.28984000 | -0.62742400 |
| C | 1.21222400  | -1.65972700 | -0.55299900 |
| C | 1.83182800  | -1.76146400 | -1.80123000 |
| C | 1.71494900  | -2.37997700 | 0.53376000  |
| C | 2.94577400  | -2.58062400 | -1.96405300 |
| H | 1.44897700  | -1.18004900 | -2.63487700 |
| C | 2.83669200  | -3.18502000 | 0.36912600  |
| H | 1.22971700  | -2.28722700 | 1.49827300  |
| C | 3.45123100  | -3.28886800 | -0.87771900 |
| H | 3.42339400  | -2.65603900 | -2.93573700 |
| H | 3.23686900  | -3.72813500 | 1.21940800  |
| H | 4.32641000  | -3.91954500 | -1.00028300 |
| C | -1.76553900 | -2.00485400 | 0.38214100  |
| O | -1.19884600 | -2.22153500 | 1.42294200  |
| C | -3.17984100 | -2.41656700 | 0.06549300  |
| C | -3.61783900 | -2.29833800 | -1.39086300 |
| H | -3.30752900 | -3.43432400 | 0.44800100  |

|   |             |             |             |
|---|-------------|-------------|-------------|
| H | -3.80669700 | -1.77034300 | 0.69511200  |
| C | -5.08963600 | -2.66804300 | -1.54870300 |
| H | -2.99321000 | -2.94065700 | -2.02059200 |
| H | -3.45219600 | -1.27057900 | -1.72772400 |
| H | -5.40993400 | -2.58967700 | -2.59030500 |
| H | -5.71904200 | -2.00140600 | -0.94977100 |
| H | -5.27781500 | -3.69316200 | -1.21444700 |

M8SS

|   |             |             |             |
|---|-------------|-------------|-------------|
| C | -1.75071200 | 3.10874700  | 0.75433300  |
| O | -2.03818500 | 4.12790300  | 1.30147300  |
| C | -1.16143900 | 2.66755900  | -0.57281400 |
| C | 0.37719700  | 2.82266500  | -0.67217300 |
| H | -1.71212600 | 2.98775500  | -1.45715300 |
| C | 0.95796300  | 3.70726500  | 0.43135600  |
| H | 0.62664500  | 3.28263600  | -1.63196600 |
| H | 2.03675200  | 3.82049700  | 0.30683900  |
| H | 0.49348900  | 4.69588100  | 0.40093600  |
| H | 0.77796500  | 3.28654200  | 1.42640700  |
| C | -1.47681100 | 1.24336000  | -0.03490300 |
| O | -1.87297900 | 1.84515900  | 1.25613300  |
| C | -0.16009600 | 0.50533300  | -0.00504100 |
| C | 0.90420200  | 1.34696300  | -0.69105400 |
| H | 0.89371900  | 1.03039900  | -1.74435100 |
| C | -2.64230300 | 0.53865000  | -0.68961500 |
| C | -2.41865000 | -0.29721400 | -1.78778100 |
| C | -3.94807200 | 0.77653400  | -0.26095400 |
| C | -3.49401100 | -0.88285000 | -2.44696100 |
| H | -1.40126100 | -0.50947500 | -2.10895500 |
| C | -5.02087300 | 0.18367800  | -0.92284800 |
| H | -4.12515000 | 1.40881700  | 0.60256000  |
| C | -4.79811200 | -0.64434100 | -2.01817700 |
| H | -3.30992600 | -1.53529500 | -3.29465600 |
| H | -6.03240200 | 0.36729800  | -0.57469300 |
| H | -5.63438400 | -1.10830200 | -2.53120900 |
| C | 2.32697900  | 1.19954500  | -0.19540700 |
| C | 3.37402600  | 1.14961300  | -1.11700900 |
| C | 2.63415800  | 1.17033300  | 1.17015400  |
| C | 4.70119500  | 1.09059100  | -0.69155100 |
| H | 3.14447200  | 1.15401200  | -2.18033000 |
| C | 3.95640500  | 1.12762500  | 1.59842400  |
| H | 1.82667600  | 1.17419400  | 1.89768900  |
| C | 4.99587300  | 1.08981900  | 0.66839300  |
| H | 5.50169000  | 1.04930200  | -1.42396700 |

|   |             |             |             |
|---|-------------|-------------|-------------|
| H | 4.17722600  | 1.11257800  | 2.66101600  |
| H | 6.02709000  | 1.04913900  | 1.00427200  |
| C | -0.02714600 | -0.78114200 | 0.35281300  |
| O | 1.18079400  | -1.44487000 | 0.14849600  |
| C | -1.04804100 | -1.65845100 | 0.95753700  |
| C | -1.95241900 | -1.18637700 | 1.91361200  |
| C | -1.11965400 | -2.99473100 | 0.54573500  |
| C | -2.93074700 | -2.03270500 | 2.42528300  |
| H | -1.88351600 | -0.16150900 | 2.26171500  |
| C | -2.09946900 | -3.83538000 | 1.05786100  |
| H | -0.41366800 | -3.36787300 | -0.18958300 |
| C | -3.00997100 | -3.35496900 | 1.99748600  |
| H | -3.62861000 | -1.65690400 | 3.16634300  |
| H | -2.15443200 | -4.86606600 | 0.72285300  |
| H | -3.77390100 | -4.01293500 | 2.39903700  |
| C | 1.62986700  | -1.61726600 | -1.12311400 |
| O | 0.98904200  | -1.31301000 | -2.09835800 |
| C | 2.99831900  | -2.25130300 | -1.16292800 |
| C | 3.74252100  | -2.31575600 | 0.16658700  |
| H | 2.87023600  | -3.25020200 | -1.59838800 |
| H | 3.56691500  | -1.67151200 | -1.89858200 |
| C | 5.19562500  | -2.73339400 | -0.03172300 |
| H | 3.23055800  | -3.01198500 | 0.83850000  |
| H | 3.70002800  | -1.33307100 | 0.64394000  |
| H | 5.71936100  | -2.80276700 | 0.92482000  |
| H | 5.72352900  | -2.00021200 | -0.65068300 |
| H | 5.26883500  | -3.70679400 | -0.52749800 |

PRR

|   |             |            |             |
|---|-------------|------------|-------------|
| C | 0.94624800  | 2.99540000 | -0.17376900 |
| C | -0.55193800 | 3.11636700 | -0.16572800 |
| H | 1.60578000  | 3.85864200 | -0.14955000 |
| C | -1.10519100 | 4.19019000 | -1.09758300 |
| H | -0.89104300 | 3.33872100 | 0.85683500  |
| H | -2.19963300 | 4.17748500 | -1.08694100 |
| H | -0.77492100 | 5.18704900 | -0.79245700 |
| H | -0.76795100 | 4.01739500 | -2.12449300 |
| C | 1.37725800  | 1.72392700 | -0.23429100 |
| C | 0.21340600  | 0.81163000 | -0.30599400 |
| C | -1.02273300 | 1.67700000 | -0.53933100 |
| H | -1.24007900 | 1.66911900 | -1.61742000 |
| C | 2.80383300  | 1.33121800 | -0.29924500 |
| C | 3.71707300  | 1.84457000 | 0.62497200  |
| C | 3.25993100  | 0.44623500 | -1.28286200 |

|   |             |             |             |
|---|-------------|-------------|-------------|
| C | 5.05603100  | 1.46367900  | 0.58337200  |
| H | 3.36343400  | 2.52342600  | 1.39594500  |
| C | 4.59428700  | 0.06372200  | -1.32328300 |
| H | 2.55370900  | 0.04297900  | -2.00253700 |
| C | 5.49587600  | 0.56680700  | -0.38526300 |
| H | 5.75304100  | 1.86052200  | 1.31483200  |
| H | 4.93181800  | -0.63469200 | -2.08254800 |
| H | 6.53647900  | 0.25922000  | -0.41106000 |
| C | -2.28571700 | 1.29544200  | 0.20056600  |
| C | -3.52725700 | 1.36141700  | -0.43592200 |
| C | -2.24706500 | 0.95466200  | 1.55680800  |
| C | -4.70540400 | 1.09870500  | 0.26251900  |
| H | -3.56974800 | 1.62371600  | -1.49061300 |
| C | -3.41923700 | 0.68369200  | 2.25570600  |
| H | -1.28575900 | 0.87574300  | 2.05851800  |
| C | -4.65437200 | 0.76100000  | 1.61261300  |
| H | -5.66101000 | 1.15976500  | -0.24946500 |
| H | -3.36774300 | 0.40720500  | 3.30400200  |
| H | -5.56858600 | 0.55307200  | 2.15926600  |
| C | 0.18904200  | -0.53021400 | -0.22985900 |
| O | -1.01526400 | -1.13989100 | -0.59074900 |
| C | 1.29991300  | -1.43592300 | 0.12057900  |
| C | 1.58667900  | -2.55128100 | -0.67107600 |
| C | 2.09605600  | -1.16411200 | 1.23642100  |
| C | 2.68907200  | -3.34917700 | -0.37970500 |
| H | 0.95580100  | -2.77473900 | -1.52694900 |
| C | 3.20028600  | -1.95590500 | 1.52203800  |
| H | 1.84521900  | -0.31692600 | 1.86740900  |
| C | 3.50416000  | -3.04627300 | 0.70891200  |
| H | 2.91641900  | -4.20560100 | -1.00677400 |
| H | 3.82239000  | -1.72404900 | 2.38048800  |
| H | 4.36784200  | -3.66535800 | 0.93005800  |
| C | -1.68200600 | -1.83684500 | 0.37144800  |
| O | -1.22617300 | -2.05480400 | 1.46258900  |
| C | -3.07017300 | -2.21915400 | -0.07662700 |
| C | -3.37861000 | -2.07619100 | -1.56328700 |
| H | -3.25696800 | -3.23660600 | 0.28176500  |
| H | -3.73388700 | -1.56287900 | 0.50395800  |
| C | -4.85217700 | -2.35341600 | -1.84570100 |
| H | -2.74334300 | -2.75427400 | -2.14369500 |
| H | -3.12569000 | -1.06044400 | -1.88098400 |
| H | -5.08018600 | -2.24970500 | -2.90936700 |
| H | -5.48369400 | -1.64898000 | -1.29371400 |
| H | -5.13381700 | -3.36527300 | -1.53779400 |

PRS

|   |             |             |             |
|---|-------------|-------------|-------------|
| C | -0.62041200 | -2.74960400 | -1.03675100 |
| C | 0.75899900  | -2.59497100 | -1.61997900 |
| H | -1.12267600 | -3.71143300 | -0.97501700 |
| C | 1.70445100  | -3.73394700 | -1.24426900 |
| H | 0.67797100  | -2.57242900 | -2.71644400 |
| H | 1.31949600  | -4.68131400 | -1.63253300 |
| H | 2.70254600  | -3.57565900 | -1.66203700 |
| H | 1.80495000  | -3.82080800 | -0.15905000 |
| C | -1.13850700 | -1.59778700 | -0.57521800 |
| C | -0.14725600 | -0.51808800 | -0.74652800 |
| C | 1.17964300  | -1.15655500 | -1.14605500 |
| H | 1.59832800  | -0.59837100 | -1.99037500 |
| C | -2.43603700 | -1.46850900 | 0.12334300  |
| C | -2.54144200 | -0.68666800 | 1.28061400  |
| C | -3.56896600 | -2.13428000 | -0.35081600 |
| C | -3.75810000 | -0.56929000 | 1.94065100  |
| H | -1.66771200 | -0.15135100 | 1.64427700  |
| C | -4.78768300 | -2.01652600 | 0.31210700  |
| H | -3.49529000 | -2.72661300 | -1.25883500 |
| C | -4.88609900 | -1.23063200 | 1.45662500  |
| H | -3.82731100 | 0.04687500  | 2.83145200  |
| H | -5.66288700 | -2.53085200 | -0.07254100 |
| H | -5.83840400 | -1.12972100 | 1.96747100  |
| C | 2.23319300  | -1.15749600 | -0.05424200 |
| C | 3.58676200  | -1.10738600 | -0.40457500 |
| C | 1.89634200  | -1.23091600 | 1.29922100  |
| C | 4.58101900  | -1.12145800 | 0.56966600  |
| H | 3.86125100  | -1.05218100 | -1.45602400 |
| C | 2.88745400  | -1.23634600 | 2.27777800  |
| H | 0.84959300  | -1.25444800 | 1.58984900  |
| C | 4.23205000  | -1.18146000 | 1.91777600  |
| H | 5.62574700  | -1.07989300 | 0.27674600  |
| H | 2.60598700  | -1.27611700 | 3.32516400  |
| H | 5.00258800  | -1.18257900 | 2.68221500  |
| C | -0.31203100 | 0.81099900  | -0.62124100 |
| O | 0.87180100  | 1.57071000  | -0.63856500 |
| C | -1.57327000 | 1.57179000  | -0.57475100 |
| C | -2.64843200 | 1.17130300  | -1.37901800 |
| C | -1.72500500 | 2.69557900  | 0.24624900  |
| C | -3.86429900 | 1.84096700  | -1.32265500 |
| H | -2.52324600 | 0.32492900  | -2.04756100 |
| C | -2.94071700 | 3.36926900  | 0.29426200  |



|   |             |            |             |
|---|-------------|------------|-------------|
| H | -0.90249900 | 3.01554400 | 0.87446700  |
| C | -4.01580900 | 2.93973200 | -0.48010600 |
| H | -4.69122900 | 1.50934400 | -1.94229100 |
| H | -3.05028500 | 4.22966300 | 0.94690300  |
| H | -4.96474100 | 3.46466800 | -0.43396900 |
| C | 1.44925900  | 1.80213400 | 0.57097300  |
| O | 0.86325500  | 1.66571200 | 1.61574000  |
| C | 2.89431600  | 2.21770900 | 0.46122400  |
| C | 3.45594800  | 2.37502800 | -0.94682200 |
| H | 3.01180100  | 3.13690900 | 1.04567800  |
| H | 3.44380000  | 1.43788400 | 1.00746200  |
| C | 4.96035700  | 2.62545800 | -0.91196800 |
| H | 2.94181000  | 3.19282800 | -1.46235000 |
| H | 3.24267500  | 1.46583400 | -1.51779500 |
| H | 5.36794300  | 2.74675800 | -1.91840600 |
| H | 5.47560600  | 1.78453000 | -0.43565700 |
| H | 5.19937400  | 3.52833300 | -0.34116600 |

PSR

|   |             |             |             |
|---|-------------|-------------|-------------|
| C | -0.98485800 | -2.92482900 | 0.56299400  |
| C | 0.50984900  | -3.08345000 | 0.53227300  |
| H | -1.66253400 | -3.76080900 | 0.71122600  |
| C | 0.95602000  | -3.81490900 | -0.73879800 |
| H | 0.85894300  | -3.66536000 | 1.39338100  |
| H | 2.04394500  | -3.90829900 | -0.78600400 |
| H | 0.52136100  | -4.81867700 | -0.75848000 |
| H | 0.61666500  | -3.28566900 | -1.63417300 |
| C | -1.39189400 | -1.65710300 | 0.38240700  |
| C | -0.21215100 | -0.76737300 | 0.27959400  |
| C | 0.99799400  | -1.60066000 | 0.68168100  |
| H | 1.13543200  | -1.42611400 | 1.75649100  |
| C | -2.80923900 | -1.22956800 | 0.41852200  |
| C | -3.21373700 | -0.19220300 | 1.26663200  |
| C | -3.76048700 | -1.85739500 | -0.38763800 |
| C | -4.53824300 | 0.22460700  | 1.28535800  |
| H | -2.47220500 | 0.29849800  | 1.89130800  |
| C | -5.08960300 | -1.44097800 | -0.36743400 |
| H | -3.44550600 | -2.65790000 | -1.05149000 |
| C | -5.47948800 | -0.39467400 | 0.46290500  |
| H | -4.83697000 | 1.03993400  | 1.93658700  |
| H | -5.81790000 | -1.92873100 | -1.00793400 |
| H | -6.51251800 | -0.06161300 | 0.47091600  |
| C | 2.31216700  | -1.29808100 | -0.00152500 |
| C | 3.48710400  | -1.26594900 | 0.75263800  |

|     |             |             |             |
|-----|-------------|-------------|-------------|
| C   | 2.40451100  | -1.10065200 | -1.38456400 |
| C   | 4.72662000  | -1.06254500 | 0.14579000  |
| H   | 3.42714800  | -1.40000200 | 1.83049900  |
| C   | 3.63928500  | -0.91370800 | -1.99656700 |
| H   | 1.49593400  | -1.08343100 | -1.98031300 |
| C   | 4.80723300  | -0.89628600 | -1.23310600 |
| H   | 5.62695800  | -1.03989600 | 0.75230200  |
| H   | 3.69068200  | -0.76817800 | -3.07109000 |
| H   | 5.76992300  | -0.74287000 | -1.71027900 |
| C   | -0.19211500 | 0.54688900  | -0.00950900 |
| O   | 0.99013300  | 1.28034600  | 0.11533500  |
| C   | -1.30433500 | 1.38151800  | -0.50278700 |
| C   | -2.13658600 | 0.94271500  | -1.53607100 |
| C   | -1.54791000 | 2.62474000  | 0.09033600  |
| C   | -3.22995200 | 1.70589600  | -1.92965400 |
| H   | -1.93052500 | -0.01121500 | -2.01227400 |
| C   | -2.63846100 | 3.38970700  | -0.30633600 |
| H   | -0.89448000 | 2.97208600  | 0.88573100  |
| C   | -3.48756400 | 2.92664500  | -1.31002000 |
| H   | -3.88123700 | 1.34712800  | -2.72009000 |
| H   | -2.83055900 | 4.34501400  | 0.17174100  |
| H   | -4.34349300 | 3.52072700  | -1.61407500 |
| C   | 1.59404800  | 1.36743400  | 1.32929600  |
| O   | 1.11649300  | 0.92932600  | 2.34502500  |
| C   | 2.91530500  | 2.09597600  | 1.25131000  |
| C   | 3.46179100  | 2.34005600  | -0.15096600 |
| H   | 2.78940800  | 3.03823600  | 1.79946500  |
| H   | 3.61599500  | 1.49506500  | 1.84179400  |
| C   | 4.89585800  | 2.85676800  | -0.10528900 |
| H   | 2.81403500  | 3.04857800  | -0.67695500 |
| H   | 3.42146900  | 1.40403400  | -0.71422300 |
| H   | 5.27713500  | 3.05403500  | -1.11033100 |
| H   | 5.55435800  | 2.11769500  | 0.36339600  |
| H   | 4.96858000  | 3.78482800  | 0.47115600  |
| PSS |             |             |             |
| C   | 1.01879900  | 2.92081300  | -0.08407400 |
| C   | -0.47678200 | 3.06035800  | -0.14982800 |
| H   | 1.69276100  | 3.77277400  | -0.10153200 |
| C   | -1.04420200 | 4.21478500  | 0.66887300  |
| H   | -0.78650300 | 3.19087900  | -1.19763800 |
| H   | -0.70568300 | 5.17951000  | 0.28073000  |
| H   | -2.13820700 | 4.20108100  | 0.63984000  |
| H   | -0.72687500 | 4.13525000  | 1.71331100  |

|   |             |             |             |
|---|-------------|-------------|-------------|
| C | 1.42084900  | 1.64414000  | 0.04203600  |
| C | 0.23294000  | 0.75903300  | 0.10531200  |
| C | -0.96581900 | 1.66650900  | 0.34546700  |
| H | -1.09620100 | 1.73604700  | 1.43501400  |
| C | 2.83042500  | 1.23082500  | 0.22519200  |
| C | 3.17777800  | 0.31846300  | 1.22834600  |
| C | 3.83778300  | 1.76853300  | -0.57955000 |
| C | 4.50289100  | -0.05544400 | 1.41092200  |
| H | 2.39607500  | -0.10261100 | 1.85484900  |
| C | 5.16651300  | 1.39561500  | -0.39467000 |
| H | 3.56927000  | 2.46521200  | -1.36901600 |
| C | 5.50162100  | 0.47924000  | 0.59770900  |
| H | 4.75792500  | -0.76828800 | 2.18882800  |
| H | 5.93806600  | 1.81443000  | -1.03318600 |
| H | 6.53564500  | 0.18040600  | 0.73751000  |
| C | -2.28877400 | 1.27071300  | -0.26827100 |
| C | -3.45272500 | 1.27918000  | 0.50241200  |
| C | -2.39006000 | 0.96317300  | -1.62993100 |
| C | -4.69288000 | 0.99476200  | -0.07048700 |
| H | -3.38210100 | 1.50820100  | 1.56350500  |
| C | -3.62425500 | 0.68555000  | -2.20638900 |
| H | -1.48738900 | 0.93935300  | -2.23614500 |
| C | -4.78278400 | 0.70273200  | -1.42751500 |
| H | -5.58718000 | 1.00697200  | 0.54531400  |
| H | -3.68458300 | 0.45022600  | -3.26442800 |
| H | -5.74613900 | 0.48499600  | -1.87767000 |
| C | 0.20196900  | -0.58244600 | 0.00682300  |
| O | -0.97746000 | -1.28899700 | 0.24376600  |
| C | 1.29604000  | -1.47635700 | -0.41846800 |
| C | 2.10837500  | -1.14061700 | -1.50561600 |
| C | 1.52922400  | -2.67614100 | 0.26207900  |
| C | 3.16608100  | -1.96310700 | -1.87496600 |
| H | 1.90726200  | -0.22492800 | -2.05361100 |
| C | 2.58552900  | -3.50022000 | -0.10978200 |
| H | 0.88970100  | -2.94837800 | 1.09683000  |
| C | 3.41100300  | -3.14169100 | -1.17409100 |
| H | 3.79614100  | -1.68623100 | -2.71397900 |
| H | 2.76819100  | -4.42203600 | 0.43328400  |
| H | 4.23754300  | -3.78366900 | -1.46132000 |
| C | -1.61328100 | -1.15907000 | 1.43756100  |
| O | -1.17134600 | -0.53226700 | 2.36628800  |
| C | -2.92216200 | -1.91314300 | 1.45572000  |
| C | -3.44786300 | -2.36115000 | 0.09533500  |
| H | -2.78903500 | -2.76808900 | 2.13055900  |

|   |             |             |             |
|---|-------------|-------------|-------------|
| H | -3.63800900 | -1.24652800 | 1.94876800  |
| C | -4.88242200 | -2.86895200 | 0.19445200  |
| H | -2.79190300 | -3.13713600 | -0.31135600 |
| H | -3.39998000 | -1.51779000 | -0.59962100 |
| H | -5.24773800 | -3.21304100 | -0.77629500 |
| H | -5.54842700 | -2.07081500 | 0.53935600  |
| H | -4.96504900 | -3.70219200 | 0.90007300  |

Coordinates for the decarboxylation process

CO2

|   |            |            |             |
|---|------------|------------|-------------|
| C | 0.00000000 | 0.00000000 | 0.00000000  |
| O | 0.00000000 | 0.00000000 | 1.16277000  |
| O | 0.00000000 | 0.00000000 | -1.16277000 |

TS9RR-Direct

|   |             |             |             |
|---|-------------|-------------|-------------|
| C | -1.58138400 | -2.45807000 | -2.10438700 |
| O | -1.18674600 | -3.24093000 | -2.95155000 |
| C | -1.13977100 | -2.62707000 | -0.60290500 |
| C | 0.36035800  | -2.87880400 | -0.44960300 |
| H | -1.77087300 | -3.37523000 | -0.11597700 |
| C | 0.66846000  | -3.58447400 | 0.86914100  |
| H | 0.68459000  | -3.51161700 | -1.28133100 |
| H | 0.17296000  | -4.55948100 | 0.87400900  |
| H | 1.73994000  | -3.74421200 | 1.00832900  |
| H | 0.29537600  | -3.01951500 | 1.73072600  |
| C | -1.38261300 | -1.23516900 | -0.14045400 |
| O | -2.31446400 | -1.42422500 | -2.20804100 |
| C | -0.17010900 | -0.48900600 | -0.31545200 |
| C | 0.98692600  | -1.44917800 | -0.62183500 |
| H | 1.22459400  | -1.31694700 | -1.68549400 |
| C | -2.52181500 | -0.82607800 | 0.66849500  |
| C | -2.32854400 | 0.05370900  | 1.74636800  |
| C | -3.79104000 | -1.37953200 | 0.43940400  |
| C | -3.39473800 | 0.37920700  | 2.57423600  |
| H | -1.34156700 | 0.46519200  | 1.93787900  |
| C | -4.85308400 | -1.03485200 | 1.26146200  |
| H | -3.93167100 | -2.02042400 | -0.42453800 |
| C | -4.65639000 | -0.15847600 | 2.33000600  |
| H | -3.24014200 | 1.05417300  | 3.40901400  |
| H | -5.83880700 | -1.44473100 | 1.06906100  |
| H | -5.49018100 | 0.10434000  | 2.97311400  |
| C | 2.26784800  | -1.25842900 | 0.16047000  |
| C | 3.49794800  | -1.41059300 | -0.48512400 |
| C | 2.26167900  | -1.02850900 | 1.54058100  |

|   |             |             |             |
|---|-------------|-------------|-------------|
| C | 4.69348700  | -1.34753200 | 0.22839500  |
| H | 3.51617100  | -1.59151400 | -1.55697100 |
| C | 3.45281800  | -0.96377700 | 2.25732400  |
| H | 1.31524000  | -0.88325100 | 2.05478500  |
| C | 4.67370000  | -1.12937400 | 1.60439500  |
| H | 5.63857900  | -1.47359600 | -0.29052500 |
| H | 3.42680000  | -0.78047300 | 3.32656300  |
| H | 5.60248700  | -1.08306400 | 2.16374100  |
| C | -0.08676200 | 0.87282800  | -0.41313900 |
| O | 1.18293100  | 1.38881600  | -0.56357000 |
| C | -1.16876900 | 1.85665200  | -0.55229900 |
| C | -2.31304400 | 1.54192500  | -1.30026900 |
| C | -1.03590000 | 3.13370100  | 0.01546400  |
| C | -3.32259100 | 2.48613700  | -1.44252900 |
| H | -2.39687700 | 0.57263900  | -1.78275800 |
| C | -2.05947900 | 4.06108500  | -0.11913700 |
| H | -0.15512400 | 3.38453900  | 0.59367100  |
| C | -3.20552600 | 3.73886600  | -0.84549800 |
| H | -4.20153700 | 2.24004200  | -2.02859000 |
| H | -1.96172300 | 5.03881900  | 0.34067500  |
| H | -4.00043800 | 4.46985200  | -0.95430800 |
| C | 1.86690600  | 1.78777300  | 0.55661200  |
| O | 1.33345500  | 1.86941800  | 1.63155600  |
| C | 3.31153300  | 2.07825100  | 0.26159400  |
| C | 3.71172900  | 2.13938200  | -1.20865200 |
| H | 3.55844900  | 3.00496100  | 0.79024400  |
| H | 3.86742100  | 1.27907600  | 0.77039100  |
| C | 5.21924100  | 2.32484800  | -1.35093600 |
| H | 3.17631000  | 2.95351500  | -1.70817800 |
| H | 3.40255600  | 1.21167000  | -1.69940700 |
| H | 5.51367600  | 2.37823200  | -2.40141600 |
| H | 5.75226500  | 1.48609000  | -0.89100000 |
| H | 5.55367200  | 3.24363800  | -0.85923900 |

TS9RS-Direct

|   |             |            |             |
|---|-------------|------------|-------------|
| C | -1.76786800 | 2.90063400 | 1.18251000  |
| O | -1.89011800 | 4.06372700 | 1.53056100  |
| C | -1.24393800 | 2.56666700 | -0.25929100 |
| C | 0.28077800  | 2.80918000 | -0.30115800 |
| H | -1.80561600 | 3.09564600 | -1.03370600 |
| C | 0.70439100  | 3.90935400 | -1.26170900 |
| H | 0.61073700  | 3.08794400 | 0.70596300  |
| H | 0.26017100  | 4.86215000 | -0.96195600 |
| H | 1.79305000  | 4.02365600 | -1.26483500 |

|   |             |             |             |
|---|-------------|-------------|-------------|
| H | 0.37819800  | 3.68062900  | -2.28199500 |
| C | -1.43314600 | 1.09163300  | -0.28874300 |
| O | -1.94168900 | 1.82191300  | 1.83413400  |
| C | -0.17490900 | 0.43148700  | -0.26066900 |
| C | 0.91364900  | 1.43001900  | -0.64189300 |
| H | 1.04766200  | 1.37070300  | -1.73091200 |
| C | -2.69490000 | 0.46885800  | -0.69820400 |
| C | -2.65962600 | -0.53341000 | -1.68152000 |
| C | -3.93314800 | 0.92452900  | -0.22152400 |
| C | -3.84239200 | -1.07710600 | -2.16737700 |
| H | -1.70375100 | -0.85492400 | -2.08445100 |
| C | -5.10800900 | 0.36439700  | -0.70275200 |
| H | -3.95561000 | 1.66803600  | 0.56653700  |
| C | -5.06723300 | -0.63483000 | -1.67525600 |
| H | -3.80481700 | -1.84405500 | -2.93379400 |
| H | -6.06132000 | 0.70540700  | -0.31313500 |
| H | -5.99039300 | -1.06463800 | -2.05056300 |
| C | 2.26284200  | 1.24581200  | 0.01331300  |
| C | 3.43031200  | 1.29648700  | -0.74948000 |
| C | 2.36538800  | 1.09696900  | 1.40132700  |
| C | 4.68278900  | 1.20726600  | -0.14114900 |
| H | 3.35379200  | 1.41115000  | -1.82887200 |
| C | 3.61232400  | 1.00913700  | 2.01016400  |
| H | 1.45714500  | 1.06581200  | 2.00093200  |
| C | 4.77557200  | 1.06400800  | 1.23963400  |
| H | 5.58260800  | 1.25293500  | -0.74706900 |
| H | 3.67913500  | 0.89905000  | 3.08777600  |
| H | 5.74800400  | 0.99361200  | 1.71639300  |
| C | 0.00152000  | -0.90529800 | 0.01813100  |
| O | 1.19151600  | -1.51274700 | -0.23358700 |
| C | -0.93135500 | -1.80067200 | 0.70509700  |
| C | -1.83658300 | -1.31105100 | 1.65815100  |
| C | -0.89478300 | -3.17186800 | 0.40752700  |
| C | -2.71749400 | -2.19050800 | 2.27493100  |
| H | -1.83939200 | -0.25487300 | 1.91378900  |
| C | -1.78702800 | -4.03761600 | 1.02169100  |
| H | -0.17845500 | -3.54657300 | -0.31584800 |
| C | -2.70194600 | -3.54639400 | 1.95377300  |
| H | -3.41626300 | -1.81300100 | 3.01352500  |
| H | -1.77096200 | -5.09438400 | 0.77744500  |
| H | -3.39785600 | -4.22575100 | 2.43582500  |
| C | 1.82426700  | -1.37850100 | -1.45669900 |
| O | 1.27400300  | -0.90313100 | -2.40950400 |
| C | 3.21163400  | -1.96236200 | -1.42268500 |

|   |            |             |             |
|---|------------|-------------|-------------|
| C | 3.79184200 | -2.20913600 | -0.03248100 |
| H | 3.17509600 | -2.88926600 | -2.00924200 |
| H | 3.83638800 | -1.26695900 | -1.99331800 |
| C | 5.28028200 | -2.53179700 | -0.10678800 |
| H | 3.24650300 | -3.02566900 | 0.45110000  |
| H | 3.63558400 | -1.31952400 | 0.58451400  |
| H | 5.68860200 | -2.72606400 | 0.88766500  |
| H | 5.83373300 | -1.69118200 | -0.53801100 |
| H | 5.46894500 | -3.41329000 | -0.72781300 |

TS9SR-Direct

|   |             |             |             |
|---|-------------|-------------|-------------|
| C | 1.72436300  | 2.80731800  | -1.57477700 |
| O | 1.62066000  | 3.88675800  | -2.13687600 |
| C | 1.16560300  | 2.65522100  | -0.09526700 |
| C | -0.35208900 | 2.85361600  | 0.05220100  |
| H | 1.75463600  | 3.29392400  | 0.56683300  |
| C | -0.95380900 | 4.06132700  | -0.65051200 |
| H | -0.56076800 | 2.93805500  | 1.12716100  |
| H | -0.78836100 | 4.01003700  | -1.72767700 |
| H | -2.02874500 | 4.10361100  | -0.44808000 |
| H | -0.49737300 | 4.98742900  | -0.29277300 |
| C | 1.37555500  | 1.20330400  | 0.12132300  |
| O | 2.24044400  | 1.72058100  | -1.96974900 |
| C | 0.17361200  | 0.50075200  | -0.19132200 |
| C | -0.96109000 | 1.50515700  | -0.41870900 |
| H | -1.12272400 | 1.55502100  | -1.50511100 |
| C | 2.52485500  | 0.65945300  | 0.83250800  |
| C | 2.33975700  | -0.35940000 | 1.78193500  |
| C | 3.80007600  | 1.21323000  | 0.64293600  |
| C | 3.42100800  | -0.81917900 | 2.52175000  |
| H | 1.34699800  | -0.76978300 | 1.94607000  |
| C | 4.87686600  | 0.73260600  | 1.37281600  |
| H | 3.93626800  | 1.96961200  | -0.12229700 |
| C | 4.68919200  | -0.28024800 | 2.31444000  |
| H | 3.27332800  | -1.59842800 | 3.26156600  |
| H | 5.86630500  | 1.14526200  | 1.20732200  |
| H | 5.53381100  | -0.64729500 | 2.88882600  |
| C | -2.29380100 | 1.24699600  | 0.24750000  |
| C | -3.47580800 | 1.31444200  | -0.49363700 |
| C | -2.37899400 | 1.04518400  | 1.62979600  |
| C | -4.71747200 | 1.19595000  | 0.12904100  |
| H | -3.42096300 | 1.47602900  | -1.56726800 |
| C | -3.61599300 | 0.92194000  | 2.25504800  |
| H | -1.46593300 | 0.97577000  | 2.21681900  |

|   |             |             |             |
|---|-------------|-------------|-------------|
| C | -4.79075600 | 1.00368500  | 1.50664100  |
| H | -5.62554900 | 1.25994500  | -0.46237700 |
| H | -3.66340800 | 0.76267300  | 3.32744600  |
| H | -5.75574500 | 0.91377900  | 1.99494500  |
| C | 0.08351800  | -0.84399800 | -0.43920600 |
| O | -1.18475000 | -1.35908800 | -0.58048400 |
| C | 1.15742700  | -1.79582300 | -0.72461000 |
| C | 2.29443900  | -1.38123500 | -1.43515400 |
| C | 1.02111200  | -3.13743500 | -0.33562900 |
| C | 3.29623000  | -2.30093500 | -1.71742100 |
| H | 2.37301600  | -0.35143500 | -1.77359800 |
| C | 2.03695100  | -4.04154500 | -0.60838000 |
| H | 0.14214900  | -3.45904000 | 0.21149500  |
| C | 3.17588200  | -3.62389600 | -1.29752300 |
| H | 4.17155800  | -1.98300500 | -2.27353300 |
| H | 1.94170500  | -5.07313700 | -0.28690800 |
| H | 3.96594100  | -4.33591600 | -1.51467100 |
| C | -1.82099600 | -1.79481500 | 0.55805300  |
| O | -1.24432700 | -1.88078400 | 1.60948900  |
| C | -3.26328100 | -2.12894900 | 0.30600800  |
| C | -3.69920100 | -2.22283900 | -1.15256700 |
| H | -3.46736500 | -3.05584500 | 0.85215000  |
| H | -3.82998400 | -1.34034000 | 0.81862900  |
| C | -5.19887300 | -2.48465100 | -1.25147800 |
| H | -3.13859900 | -3.01515300 | -1.65980300 |
| H | -3.44940500 | -1.28578500 | -1.65909900 |
| H | -5.52141700 | -2.54664100 | -2.29319000 |
| H | -5.76083700 | -1.67788400 | -0.76943700 |
| H | -5.47044900 | -3.42260000 | -0.75730300 |

TS9SS-Direct

|   |             |            |             |
|---|-------------|------------|-------------|
| C | -0.84635700 | 2.90330600 | 1.00769000  |
| O | -0.49266100 | 4.00521700 | 1.39349400  |
| C | -0.91297500 | 2.59081400 | -0.53362300 |
| C | 0.43783800  | 2.59860100 | -1.27417100 |
| H | -1.65364000 | 3.24977900 | -0.99328900 |
| C | 1.37534400  | 3.74231800 | -0.91061900 |
| H | 0.20513100  | 2.67971900 | -2.34249200 |
| H | 2.27906700  | 3.69704500 | -1.52618400 |
| H | 0.88178600  | 4.70180600 | -1.08354500 |
| H | 1.66311200  | 3.70680100 | 0.14072900  |
| C | -1.32750800 | 1.16055200 | -0.49604300 |
| O | -1.21188800 | 1.88273500 | 1.67698000  |
| C | -0.17726500 | 0.33084700 | -0.62362000 |



|   |             |             |             |
|---|-------------|-------------|-------------|
| C | 1.02461800  | 1.15827800  | -1.06915900 |
| H | 1.36024900  | 0.80463000  | -2.04815000 |
| C | -2.71898100 | 0.73662300  | -0.62316200 |
| C | -3.04287700 | -0.32119300 | -1.48620100 |
| C | -3.74092300 | 1.42520500  | 0.04662000  |
| C | -4.36853900 | -0.69622100 | -1.65921900 |
| H | -2.25193200 | -0.83047800 | -2.02808000 |
| C | -5.06102400 | 1.03228300  | -0.11825700 |
| H | -3.47451400 | 2.21513500  | 0.74043600  |
| C | -5.37718400 | -0.02688200 | -0.96969000 |
| H | -4.61413600 | -1.51176600 | -2.33087200 |
| H | -5.84740100 | 1.54895200  | 0.42150200  |
| H | -6.41190100 | -0.32836500 | -1.09747900 |
| C | 2.21160400  | 1.06084900  | -0.12917400 |
| C | 3.50141900  | 1.04376100  | -0.66567700 |
| C | 2.05400400  | 1.02356200  | 1.26017500  |
| C | 4.61980800  | 0.98732600  | 0.16379900  |
| H | 3.62804800  | 1.08007800  | -1.74609400 |
| C | 3.17156800  | 0.96784400  | 2.08952000  |
| H | 1.05350200  | 1.05383200  | 1.68905200  |
| C | 4.45558500  | 0.94618900  | 1.54568400  |
| H | 5.61554800  | 0.97562100  | -0.26920700 |
| H | 3.03727800  | 0.94486000  | 3.16619800  |
| H | 5.32284100  | 0.90084100  | 2.19661900  |
| C | -0.12464300 | -0.98672800 | -0.22865800 |
| O | 1.01703700  | -1.70670500 | -0.36943100 |
| C | -1.13702300 | -1.75403300 | 0.51162700  |
| C | -1.88351500 | -1.17017500 | 1.54206300  |
| C | -1.32182500 | -3.10357400 | 0.18170000  |
| C | -2.83797300 | -1.93160100 | 2.20552300  |
| H | -1.70863500 | -0.13299000 | 1.81375200  |
| C | -2.29055800 | -3.84930500 | 0.83913700  |
| H | -0.72066000 | -3.55250900 | -0.60298500 |
| C | -3.05149000 | -3.26167300 | 1.84933500  |
| H | -3.41609100 | -1.48195400 | 3.00572900  |
| H | -2.45066500 | -4.88764500 | 0.56886200  |
| H | -3.80616700 | -3.84613600 | 2.36603500  |
| C | 1.75545500  | -1.74367900 | -1.53748800 |
| O | 1.28367100  | -1.43211900 | -2.59355400 |
| C | 3.14555600  | -2.27031300 | -1.29424800 |
| C | 3.56503200  | -2.40042000 | 0.16753900  |
| H | 3.21460400  | -3.23129400 | -1.81881700 |
| H | 3.81225100  | -1.58541000 | -1.83072000 |
| C | 5.05220400  | -2.71595600 | 0.28543800  |

|   |            |             |             |
|---|------------|-------------|-------------|
| H | 2.96870000 | -3.18123400 | 0.65009100  |
| H | 3.34233100 | -1.46541600 | 0.69062300  |
| H | 5.34731600 | -2.81901600 | 1.33220600  |
| H | 5.65103900 | -1.91105500 | -0.15309000 |
| H | 5.30740000 | -3.64649100 | -0.23178000 |

TS9RR-NHC·H+

|   |             |             |             |
|---|-------------|-------------|-------------|
| C | 0.35696800  | -0.92235000 | -0.68948400 |
| O | 1.39638500  | -1.49763900 | -1.03145800 |
| C | -1.01933100 | -1.26589700 | -1.21880700 |
| C | -1.55998700 | -2.51618200 | -0.48660000 |
| H | -1.09345900 | -1.33193200 | -2.30838200 |
| C | -1.57384700 | -3.75946900 | -1.36370600 |
| H | -0.90412100 | -2.70599900 | 0.37135000  |
| H | -1.94091700 | -4.62974400 | -0.81271300 |
| H | -2.21506400 | -3.61733200 | -2.23805100 |
| H | -0.55826700 | -3.97390000 | -1.70786400 |
| C | -1.75377100 | -0.07811000 | -0.62643400 |
| O | 0.22442400  | 0.00785100  | 0.17921000  |
| C | -2.74217500 | -0.56283800 | 0.28385400  |
| C | -2.92877400 | -2.07114200 | 0.10808300  |
| H | -3.06925200 | -2.53695400 | 1.08922700  |
| C | -1.81152500 | 1.20248200  | -1.34604700 |
| C | -3.02575300 | 1.90364800  | -1.44371400 |
| C | -0.70311500 | 1.65857600  | -2.08299500 |
| C | -3.11905200 | 3.03918100  | -2.24123300 |
| H | -3.91234600 | 1.54178600  | -0.93221700 |
| C | -0.81074900 | 2.78241500  | -2.88581400 |
| H | 0.25039000  | 1.14665300  | -2.00909700 |
| C | -2.01578100 | 3.48221100  | -2.96253100 |
| H | -4.06494700 | 3.56536400  | -2.30896900 |
| H | 0.05029300  | 3.11872300  | -3.45470600 |
| H | -2.09040700 | 4.36410800  | -3.59046900 |
| C | -4.12392000 | -2.45291200 | -0.74547200 |
| C | -4.78446500 | -3.65986500 | -0.48850300 |
| C | -4.56265200 | -1.66308200 | -1.81092100 |
| C | -5.86216400 | -4.06508200 | -1.27050000 |
| H | -4.45015200 | -4.28644500 | 0.33544300  |
| C | -5.64710700 | -2.06101600 | -2.59002700 |
| H | -4.07623200 | -0.71391600 | -2.02345700 |
| C | -6.30046000 | -3.26123000 | -2.32195100 |
| H | -6.36216800 | -5.00432800 | -1.05620900 |
| H | -5.98329300 | -1.42808100 | -3.40453400 |
| H | -7.14661700 | -3.56823100 | -2.92756000 |

|   |             |             |             |
|---|-------------|-------------|-------------|
| C | -3.52044900 | 0.15090200  | 1.15886300  |
| O | -4.64333300 | -0.51395300 | 1.59953300  |
| C | -3.27595300 | 1.45138200  | 1.76310200  |
| C | -1.97210400 | 1.97054700  | 1.84665700  |
| C | -4.35227300 | 2.17166700  | 2.30778200  |
| C | -1.76913300 | 3.20372500  | 2.45068800  |
| H | -1.13070700 | 1.39368900  | 1.46897000  |
| C | -4.13663100 | 3.41012100  | 2.89274200  |
| H | -5.35657300 | 1.76973600  | 2.25687400  |
| C | -2.84489900 | 3.92755000  | 2.96400900  |
| H | -0.76346800 | 3.59471900  | 2.55354600  |
| H | -4.97263700 | 3.96784400  | 3.29996100  |
| H | -2.67340800 | 4.89008600  | 3.43482700  |
| C | -5.77687900 | -0.35149200 | 0.82043900  |
| O | -5.85300400 | 0.53738500  | 0.01704700  |
| C | -6.83344400 | -1.37971000 | 1.10179700  |
| C | -6.55451500 | -2.36063100 | 2.23520600  |
| H | -7.76926600 | -0.83341400 | 1.26251300  |
| H | -6.95584400 | -1.91349300 | 0.14848000  |
| C | -7.63940300 | -3.43049000 | 2.30394800  |
| H | -6.48750600 | -1.82023700 | 3.18522600  |
| H | -5.57913200 | -2.83012400 | 2.07286200  |
| H | -7.45032600 | -4.13352500 | 3.11788900  |
| H | -7.67761700 | -3.99650800 | 1.36738700  |
| H | -8.62529000 | -2.98452200 | 2.46516900  |
| C | 4.92896800  | -3.05516500 | 0.07336000  |
| C | 6.30294700  | -3.24626800 | -0.09402300 |
| C | 6.78023600  | -3.86925900 | -1.24083400 |
| C | 5.86631500  | -4.27927600 | -2.21072300 |
| C | 4.49620000  | -4.07239600 | -2.04099200 |
| C | 4.00938700  | -3.45770000 | -0.88884400 |
| C | 4.65953300  | -2.36839400 | 1.38629200  |
| C | 5.98931300  | -2.55928000 | 2.16025600  |
| C | 7.07793000  | -2.68497800 | 1.07264700  |
| H | 7.84405100  | -4.03394800 | -1.38073100 |
| H | 6.22538500  | -4.76727500 | -3.11105500 |
| H | 3.80358000  | -4.39826800 | -2.80945000 |
| H | 2.94418800  | -3.28452500 | -0.75991700 |
| H | 5.91043700  | -3.51067200 | 2.69069100  |
| H | 7.50301900  | -1.70935400 | 0.80712600  |
| H | 3.79182000  | -2.74422300 | 1.93190500  |
| H | 7.90379400  | -3.31951800 | 1.40017700  |
| C | 5.18346400  | 0.07898400  | 1.80657600  |
| C | 3.52618300  | -0.31397700 | 0.44661100  |

|    |            |             |             |
|----|------------|-------------|-------------|
| N  | 4.75970600 | 1.25785700  | 1.44852400  |
| N  | 4.44915000 | -0.91064400 | 1.20318400  |
| N  | 3.72689900 | 0.98638200  | 0.60140700  |
| C  | 6.32092900 | -0.26490600 | 2.72016900  |
| H  | 7.27236400 | -0.09390500 | 2.20131200  |
| H  | 6.29188800 | 0.38028600  | 3.59911500  |
| C  | 2.99255700 | 2.04044700  | -0.00961500 |
| C  | 3.32826100 | 2.47727700  | -1.29115300 |
| C  | 1.97173900 | 2.67614900  | 0.69854100  |
| C  | 2.66330500 | 3.55408400  | -1.86428700 |
| C  | 1.28891900 | 3.74586400  | 0.13716300  |
| C  | 1.66154500 | 4.18168500  | -1.13099700 |
| H  | 2.93824900 | 3.90639700  | -2.85116500 |
| H  | 0.49276300 | 4.24193900  | 0.67827400  |
| Cl | 4.59670100 | 1.69159900  | -2.16225500 |
| Cl | 0.86473000 | 5.56127300  | -1.80997700 |
| Cl | 1.59599200 | 2.14506900  | 2.29673000  |
| O  | 6.19036600 | -1.59334600 | 3.16987000  |
| H  | 2.73530400 | -0.78829100 | -0.16915600 |

TS9RS-NHC·H+

|   |             |             |             |
|---|-------------|-------------|-------------|
| C | 0.32546400  | -0.66011600 | -1.09369500 |
| O | 1.40188100  | -1.22107900 | -1.32541300 |
| C | -0.92659800 | -0.84086800 | -1.92339100 |
| C | -1.60848300 | -2.18202400 | -1.57816000 |
| H | -0.79382900 | -0.68339400 | -2.99770600 |
| C | -1.53071200 | -3.22082400 | -2.68521000 |
| H | -1.13008700 | -2.58891200 | -0.67815800 |
| H | -2.04243900 | -4.14043700 | -2.38719100 |
| H | -2.00036200 | -2.84601000 | -3.60039300 |
| H | -0.48843800 | -3.46357000 | -2.90842600 |
| C | -1.76255700 | 0.23373200  | -1.24935000 |
| O | 0.03814800  | 0.11622300  | -0.11763800 |
| C | -2.90360700 | -0.37493300 | -0.64867100 |
| C | -3.05705000 | -1.79475100 | -1.18912300 |
| H | -3.65625300 | -1.74136300 | -2.10863600 |
| C | -1.72786000 | 1.62837000  | -1.71896800 |
| C | -2.93807200 | 2.23535000  | -2.09390500 |
| C | -0.52122200 | 2.29957800  | -1.97851900 |
| C | -2.94086300 | 3.49036400  | -2.69316500 |
| H | -3.87180600 | 1.69611500  | -1.97119700 |
| C | -0.53455400 | 3.54534100  | -2.58689700 |
| H | 0.41854700  | 1.85367700  | -1.67155200 |
| C | -1.74180800 | 4.14897300  | -2.94026800 |

|   |             |             |             |
|---|-------------|-------------|-------------|
| H | -3.88329100 | 3.94250000  | -2.98275800 |
| H | 0.40318600  | 4.05462400  | -2.78547000 |
| H | -1.74209300 | 5.12480700  | -3.41482200 |
| C | -3.68632900 | -2.81021700 | -0.26265000 |
| C | -4.64788700 | -3.70077900 | -0.74281400 |
| C | -3.26367900 | -2.92183300 | 1.06642600  |
| C | -5.17373900 | -4.69324900 | 0.08493700  |
| H | -4.98232200 | -3.61752300 | -1.77482600 |
| C | -3.78423300 | -3.91101500 | 1.89299500  |
| H | -2.51980800 | -2.22587100 | 1.45041300  |
| C | -4.74127400 | -4.80141600 | 1.40304700  |
| H | -5.91713700 | -5.38216600 | -0.30359300 |
| H | -3.44717200 | -3.98770300 | 2.92166000  |
| H | -5.14850400 | -5.57190300 | 2.04939000  |
| C | -3.78886800 | 0.26399000  | 0.18793300  |
| O | -5.01801100 | -0.25609600 | 0.42473200  |
| C | -3.52941200 | 1.43078000  | 1.03489000  |
| C | -2.26898300 | 1.63538100  | 1.61342200  |
| C | -4.59660800 | 2.28661200  | 1.34914800  |
| C | -2.10161700 | 2.67943700  | 2.51698700  |
| H | -1.44785800 | 0.96034800  | 1.38371600  |
| C | -4.40248800 | 3.35319300  | 2.21305600  |
| H | -5.57190000 | 2.11149100  | 0.90762000  |
| C | -3.15600900 | 3.54186800  | 2.80947800  |
| H | -1.15097300 | 2.80169900  | 3.02482900  |
| H | -5.22419300 | 4.02345600  | 2.43987700  |
| H | -3.01142300 | 4.35242200  | 3.51625800  |
| C | -5.83526600 | -0.67972200 | -0.61727400 |
| O | -5.58930800 | -0.40939400 | -1.75810800 |
| C | -7.04048500 | -1.42036100 | -0.10720400 |
| C | -6.97077100 | -1.88325500 | 1.34555600  |
| H | -7.90383200 | -0.76445300 | -0.27679600 |
| H | -7.16967500 | -2.26985200 | -0.78658800 |
| C | -8.11505900 | -2.83610400 | 1.67351900  |
| H | -6.99681400 | -1.01216100 | 2.00764600  |
| H | -6.01181500 | -2.38043500 | 1.51820200  |
| H | -8.07282200 | -3.15225100 | 2.71818300  |
| H | -8.06045800 | -3.73353300 | 1.04874300  |
| H | -9.08845300 | -2.36580000 | 1.50303000  |
| C | 4.86536700  | -2.96408100 | -0.40186200 |
| C | 6.24589500  | -3.12188600 | -0.55077900 |
| C | 6.77065000  | -3.50719400 | -1.77835600 |
| C | 5.89707000  | -3.71651900 | -2.84474200 |
| C | 4.52055300  | -3.54371700 | -2.69060500 |

|    |            |             |             |
|----|------------|-------------|-------------|
| C  | 3.98607600 | -3.16723700 | -1.45981100 |
| C  | 4.54165100 | -2.55679000 | 1.01161300  |
| C  | 5.84204000 | -2.90559200 | 1.78103300  |
| C  | 6.97223100 | -2.80797500 | 0.73403100  |
| H  | 7.83989800 | -3.64469500 | -1.90583200 |
| H  | 6.29297200 | -4.02070800 | -3.80824800 |
| H  | 3.85918000 | -3.71042900 | -3.53399700 |
| H  | 2.91600200 | -3.02104100 | -1.34192700 |
| H  | 5.74805500 | -3.94503400 | 2.10281500  |
| H  | 7.39795700 | -1.79813100 | 0.68838800  |
| H  | 3.65630900 | -3.03423700 | 1.43610400  |
| H  | 7.78990100 | -3.49550000 | 0.95864400  |
| C  | 5.04563800 | -0.24925200 | 1.93707900  |
| C  | 3.42523800 | -0.34855500 | 0.48246200  |
| N  | 4.62851200 | 0.97921400  | 1.81888400  |
| N  | 4.33041300 | -1.09132000 | 1.12363500  |
| N  | 3.62041600 | 0.89208200  | 0.90609100  |
| C  | 6.14880400 | -0.77561400 | 2.80428100  |
| H  | 7.11935700 | -0.51007200 | 2.36695400  |
| H  | 6.08295500 | -0.31853200 | 3.79260800  |
| C  | 2.87488400 | 2.04863600  | 0.54351600  |
| C  | 3.30102800 | 2.85981300  | -0.50848300 |
| C  | 1.75002200 | 2.40637600  | 1.28853000  |
| C  | 2.62081700 | 4.03247400  | -0.81320400 |
| C  | 1.05004300 | 3.56597700  | 0.98761900  |
| C  | 1.50963900 | 4.37290400  | -0.04811600 |
| H  | 2.96584500 | 4.67290300  | -1.61606300 |
| H  | 0.17212900 | 3.84745400  | 1.55415000  |
| Cl | 4.69507700 | 2.41410500  | -1.42439400 |
| Cl | 0.68098900 | 5.85535500  | -0.38039900 |
| Cl | 1.26578800 | 1.42007900  | 2.61924600  |
| O  | 6.00173000 | -2.16597000 | 2.97332100  |
| H  | 2.64694400 | -0.68686400 | -0.23419300 |

TS9SR-NHC·H+

|   |             |             |             |
|---|-------------|-------------|-------------|
| C | 0.60562400  | 0.46656100  | -2.14739600 |
| O | 0.98364700  | -0.49804900 | -2.80935800 |
| C | -0.45151500 | 1.49237700  | -2.60742700 |
| C | -1.78806600 | 0.90425000  | -3.07866000 |
| H | -0.01699600 | 2.20781800  | -3.31000500 |
| C | -1.72273800 | -0.12361600 | -4.19790600 |
| H | -2.40626400 | 1.74925900  | -3.41070900 |
| H | -1.13623600 | -0.99464500 | -3.90055100 |
| H | -2.73466700 | -0.44516600 | -4.45958600 |

|   |             |             |             |
|---|-------------|-------------|-------------|
| H | -1.25926400 | 0.30368800  | -5.09055300 |
| C | -0.78254800 | 2.07735800  | -1.25230700 |
| O | 0.97397400  | 0.76898900  | -0.95825000 |
| C | -1.84839200 | 1.30243300  | -0.69019200 |
| C | -2.42572200 | 0.37244400  | -1.77091400 |
| H | -2.02388800 | -0.63666700 | -1.57815700 |
| C | -0.33472500 | 3.37472300  | -0.79247300 |
| C | -1.18131600 | 4.18652500  | -0.01585900 |
| C | 0.93471600  | 3.84716800  | -1.16941100 |
| C | -0.75373200 | 5.44502200  | 0.38333200  |
| H | -2.17505200 | 3.83510700  | 0.24738800  |
| C | 1.36116800  | 5.09545100  | -0.74703900 |
| H | 1.59356400  | 3.20156700  | -1.74115900 |
| C | 0.51590800  | 5.89563700  | 0.02615800  |
| H | -1.41073000 | 6.07611100  | 0.97114800  |
| H | 2.34936500  | 5.45034600  | -1.01827700 |
| H | 0.84879400  | 6.87741300  | 0.34658700  |
| C | -3.92460400 | 0.24961300  | -1.90372600 |
| C | -4.50437700 | -1.01147800 | -2.06291400 |
| C | -4.73688900 | 1.38497700  | -1.98265400 |
| C | -5.87091300 | -1.13842300 | -2.30536700 |
| H | -3.87435600 | -1.89726100 | -2.01139900 |
| C | -6.10350600 | 1.26075000  | -2.21534100 |
| H | -4.29608600 | 2.37014800  | -1.84656400 |
| C | -6.67307400 | -0.00161200 | -2.38348300 |
| H | -6.30676100 | -2.12358100 | -2.43782900 |
| H | -6.72379500 | 2.14937900  | -2.26660100 |
| H | -7.73705800 | -0.09745500 | -2.57301400 |
| C | -2.13567600 | 1.16766400  | 0.64498400  |
| O | -3.20606600 | 0.34894500  | 0.92616200  |
| C | -1.37195300 | 1.55193100  | 1.83847900  |
| C | 0.03120400  | 1.64224700  | 1.81334700  |
| C | -2.04788800 | 1.69865700  | 3.06055900  |
| C | 0.73110100  | 1.88663200  | 2.98725100  |
| H | 0.57203400  | 1.48957800  | 0.88616300  |
| C | -1.34029400 | 1.96018800  | 4.22507300  |
| H | -3.12867700 | 1.63279100  | 3.09826300  |
| C | 0.04994300  | 2.05055100  | 4.19273100  |
| H | 1.81563100  | 1.93709700  | 2.96108500  |
| H | -1.87323700 | 2.08903000  | 5.16061400  |
| H | 0.60094800  | 2.24803900  | 5.10688200  |
| C | -4.45385600 | 0.93661500  | 1.04622700  |
| O | -4.57767400 | 2.12923700  | 1.05821500  |
| C | -5.54157300 | -0.09189900 | 1.15288700  |

|    |             |             |             |
|----|-------------|-------------|-------------|
| C  | -5.09450900 | -1.52299300 | 1.43833300  |
| H  | -6.24394200 | 0.27328900  | 1.90872800  |
| H  | -6.07375700 | -0.04555000 | 0.19304600  |
| C  | -6.28530100 | -2.47647800 | 1.41661600  |
| H  | -4.58974800 | -1.56576600 | 2.41118300  |
| H  | -4.36059500 | -1.82640100 | 0.68349500  |
| H  | -5.97436000 | -3.50293200 | 1.62282100  |
| H  | -6.76938500 | -2.45888900 | 0.43493300  |
| H  | -7.03234400 | -2.19286500 | 2.16382700  |
| C  | -0.64423700 | -2.94508300 | -0.10614700 |
| C  | -1.12437800 | -3.93331000 | 0.75742100  |
| C  | -1.54152800 | -5.15602000 | 0.24416500  |
| C  | -1.46056000 | -5.37062600 | -1.13146900 |
| C  | -0.96976100 | -4.38175700 | -1.98631500 |
| C  | -0.55602200 | -3.15029200 | -1.47974400 |
| C  | -0.29019000 | -1.70356200 | 0.66731700  |
| C  | -0.99809400 | -1.93045200 | 2.03141000  |
| C  | -1.09675500 | -3.46266200 | 2.19043100  |
| H  | -1.92471300 | -5.93047700 | 0.90129000  |
| H  | -1.78627500 | -6.32003700 | -1.54394800 |
| H  | -0.91446100 | -4.57053700 | -3.05308400 |
| H  | -0.16739700 | -2.37449800 | -2.13731300 |
| H  | -2.00609700 | -1.52045800 | 1.92073500  |
| H  | -0.22134200 | -3.87143900 | 2.70970800  |
| H  | -0.58640600 | -0.77188800 | 0.17981500  |
| H  | -1.97996000 | -3.75035600 | 2.76487300  |
| C  | 1.73132600  | -1.32287800 | 2.12800200  |
| C  | 2.11137900  | -1.34570300 | -0.01449800 |
| N  | 2.98784900  | -1.00706300 | 2.01199600  |
| N  | 1.16201800  | -1.55206600 | 0.90011700  |
| N  | 3.20662100  | -1.03478500 | 0.66336300  |
| C  | 0.92149000  | -1.48020500 | 3.37684600  |
| H  | 1.07160900  | -2.48837800 | 3.78488300  |
| H  | 1.25534700  | -0.75168200 | 4.11731400  |
| C  | 4.47128400  | -0.66559700 | 0.12791600  |
| C  | 5.38287000  | -1.64330900 | -0.27281900 |
| C  | 4.81237000  | 0.68538000  | 0.02707200  |
| C  | 6.62385900  | -1.28472400 | -0.78112100 |
| C  | 6.05125600  | 1.06101600  | -0.47284800 |
| C  | 6.93933500  | 0.06684600  | -0.87207800 |
| H  | 7.32824800  | -2.04463700 | -1.09599400 |
| H  | 6.31692200  | 2.10804900  | -0.54948500 |
| Cl | 4.96419700  | -3.31566800 | -0.14024600 |
| Cl | 8.48386500  | 0.52852200  | -1.50159300 |



|    |             |             |             |
|----|-------------|-------------|-------------|
| Cl | 3.68435100  | 1.90031000  | 0.51841400  |
| O  | -0.43474800 | -1.21363800 | 3.10767600  |
| H  | 2.00102400  | -1.38943500 | -1.09491400 |

TS9SS-NHC·H+

|   |             |             |             |
|---|-------------|-------------|-------------|
| C | 0.28774100  | 0.53345300  | -1.67933100 |
| O | 1.06758300  | -0.22868300 | -2.24702700 |
| C | -0.64291100 | 1.53126900  | -2.36249500 |
| C | -1.79222700 | 0.94667200  | -3.20763600 |
| H | -0.05974700 | 2.27403900  | -2.91298100 |
| C | -1.40828200 | -0.26833500 | -4.04378300 |
| H | -2.10477400 | 1.74223000  | -3.89121800 |
| H | -2.25128400 | -0.57769400 | -4.66721600 |
| H | -0.56237800 | -0.02816000 | -4.69237000 |
| H | -1.11925400 | -1.11467200 | -3.41659200 |
| C | -1.29076100 | 2.08035200  | -1.10366500 |
| O | 0.12297000  | 0.65617000  | -0.40883300 |
| C | -2.57191100 | 1.47344900  | -0.94032700 |
| C | -2.98491500 | 0.72982500  | -2.20823100 |
| H | -3.85251100 | 1.23568400  | -2.64206300 |
| C | -0.86308000 | 3.33918200  | -0.49395300 |
| C | -1.82372500 | 4.28310500  | -0.10024200 |
| C | 0.49977200  | 3.66163200  | -0.40096300 |
| C | -1.42447400 | 5.51396100  | 0.40605200  |
| H | -2.87845900 | 4.06182400  | -0.22822600 |
| C | 0.89098800  | 4.88600000  | 0.11788100  |
| H | 1.24336400  | 2.93067600  | -0.70109000 |
| C | -0.07033500 | 5.81291900  | 0.52571400  |
| H | -2.17256100 | 6.24204600  | 0.69996800  |
| H | 1.94617500  | 5.12499100  | 0.20096900  |
| H | 0.23998400  | 6.77314000  | 0.92450000  |
| C | -3.39071300 | -0.71344600 | -1.96706800 |
| C | -4.42452100 | -1.26792600 | -2.72587600 |
| C | -2.74775300 | -1.51471800 | -1.02037700 |
| C | -4.81638100 | -2.59186800 | -2.53860700 |
| H | -4.92625700 | -0.65418100 | -3.47134400 |
| C | -3.13925200 | -2.83712100 | -0.82596500 |
| H | -1.93116300 | -1.09350600 | -0.43517800 |
| C | -4.17765500 | -3.37760900 | -1.58238300 |
| H | -5.62159900 | -3.00680800 | -3.13681900 |
| H | -2.62514300 | -3.44899600 | -0.08935700 |
| H | -4.48460100 | -4.40695500 | -1.42857000 |
| C | -3.29779500 | 1.45319900  | 0.22980600  |
| O | -4.53763400 | 0.89816500  | 0.23744000  |

|   |             |             |             |
|---|-------------|-------------|-------------|
| C | -2.87325000 | 1.79681200  | 1.59459000  |
| C | -1.55571600 | 1.59694300  | 2.02876100  |
| C | -3.83848100 | 2.26777500  | 2.49742100  |
| C | -1.21369200 | 1.86851900  | 3.34728400  |
| H | -0.81055900 | 1.22494300  | 1.33670300  |
| C | -3.48080900 | 2.56558500  | 3.80531100  |
| H | -4.86195300 | 2.40804700  | 2.16628800  |
| C | -2.17024600 | 2.36023200  | 4.23376400  |
| H | -0.19931400 | 1.68643000  | 3.68588800  |
| H | -4.22565000 | 2.94810500  | 4.49449800  |
| H | -1.89767200 | 2.57831600  | 5.26119400  |
| C | -5.52230100 | 1.27640300  | -0.66138000 |
| O | -5.43755900 | 2.28940500  | -1.29418000 |
| C | -6.66302400 | 0.29493600  | -0.67863400 |
| C | -6.48871100 | -0.95891300 | 0.17358300  |
| H | -7.56130200 | 0.85556900  | -0.39452600 |
| H | -6.79962000 | 0.02946900  | -1.73392000 |
| C | -7.61181000 | -1.95728200 | -0.08612600 |
| H | -6.46369700 | -0.67987400 | 1.23202700  |
| H | -5.52215200 | -1.41947700 | -0.05448500 |
| H | -7.49578600 | -2.84701700 | 0.53680500  |
| H | -7.60780300 | -2.27831100 | -1.13281300 |
| H | -8.59224300 | -1.52055000 | 0.12746100  |
| C | 0.16047700  | -3.03151900 | 0.59333200  |
| C | -0.06540100 | -4.11740100 | 1.44168100  |
| C | -0.33561700 | -5.37069300 | 0.90107000  |
| C | -0.34726000 | -5.51652800 | -0.48593200 |
| C | -0.09111800 | -4.43065800 | -1.32557700 |
| C | 0.16190700  | -3.16905800 | -0.79151500 |
| C | 0.38260900  | -1.77376500 | 1.38984300  |
| C | -0.01221200 | -2.17870700 | 2.83842200  |
| C | 0.06381600  | -3.72032600 | 2.89209800  |
| H | -0.52659700 | -6.22271600 | 1.54625400  |
| H | -0.55510000 | -6.48960300 | -0.91916300 |
| H | -0.10696400 | -4.56584400 | -2.40167400 |
| H | 0.34129200  | -2.31443000 | -1.44187500 |
| H | -1.05130600 | -1.86966400 | 2.97211900  |
| H | 1.02249000  | -4.06870300 | 3.29339300  |
| H | -0.17601000 | -0.91329400 | 1.01989100  |
| H | -0.71858100 | -4.13479500 | 3.53126300  |
| C | 2.61833600  | -1.26651000 | 2.46287600  |
| C | 2.50830000  | -0.93619300 | 0.31566900  |
| N | 3.80134100  | -0.83126900 | 2.13404700  |
| N | 1.79998600  | -1.34884900 | 1.36733700  |

|    |            |             |             |
|----|------------|-------------|-------------|
| N  | 3.71215200 | -0.63812300 | 0.78850400  |
| C  | 2.09718200 | -1.64448200 | 3.81454100  |
| H  | 2.39499600 | -2.67303200 | 4.05263800  |
| H  | 2.52319700 | -0.98133600 | 4.56823800  |
| C  | 4.82186700 | -0.13475600 | 0.05320700  |
| C  | 5.76495900 | -1.01308300 | -0.48292700 |
| C  | 4.98299600 | 1.24195700  | -0.11047300 |
| C  | 6.85717100 | -0.52668800 | -1.18783000 |
| C  | 6.06767900 | 1.74661100  | -0.81258200 |
| C  | 6.99087700 | 0.84950000  | -1.34273700 |
| H  | 7.58789200 | -1.20861900 | -1.60461700 |
| H  | 6.19254400 | 2.81474300  | -0.94079900 |
| Cl | 5.56808400 | -2.71595700 | -0.26884400 |
| Cl | 8.34898200 | 1.46580100  | -2.21979800 |
| Cl | 3.81761700 | 2.32311800  | 0.57088600  |
| O  | 0.69858700 | -1.47173100 | 3.83707000  |
| H  | 2.15252900 | -0.82752200 | -0.71406800 |

TS9RR-DMAP·H+

|   |             |             |             |
|---|-------------|-------------|-------------|
| C | 1.21429300  | 0.06177100  | -2.09927800 |
| O | 1.97801800  | -0.72454400 | -2.67064100 |
| C | -0.19618400 | 0.37785300  | -2.55450200 |
| C | -1.12674500 | -0.83559700 | -2.66167500 |
| H | -0.18860300 | 0.99858400  | -3.45454000 |
| C | -2.27029100 | -0.53806900 | -3.62991600 |
| H | -0.55658500 | -1.69010300 | -3.03906100 |
| H | -1.85686900 | -0.34909800 | -4.62421100 |
| H | -2.96910400 | -1.37318900 | -3.69999200 |
| H | -2.83434000 | 0.35050300  | -3.32627900 |
| C | -0.60849400 | 1.12455800  | -1.29717700 |
| O | 1.43497000  | 0.71846500  | -1.02471200 |
| C | -1.28094300 | 0.19746100  | -0.42962200 |
| C | -1.55022700 | -1.11921300 | -1.17587800 |
| H | -0.85161600 | -1.85841500 | -0.76172000 |
| C | -0.74506700 | 2.57648200  | -1.25922600 |
| C | -1.87120500 | 3.15728000  | -0.65285300 |
| C | 0.19054300  | 3.39181400  | -1.91455400 |
| C | -2.04673200 | 4.53410500  | -0.69688300 |
| H | -2.61178900 | 2.52781800  | -0.16816800 |
| C | 0.01716200  | 4.76690300  | -1.93695200 |
| H | 1.07096400  | 2.93994100  | -2.36018400 |
| C | -1.10299000 | 5.33883900  | -1.33084300 |
| H | -2.92259500 | 4.97848300  | -0.23739500 |
| H | 0.75181200  | 5.39666700  | -2.42672700 |

|   |             |             |             |
|---|-------------|-------------|-------------|
| H | -1.24123400 | 6.41470000  | -1.35830300 |
| C | -2.94093100 | -1.70943500 | -1.07267400 |
| C | -3.08825700 | -3.09460800 | -0.96515600 |
| C | -4.08994400 | -0.92037200 | -1.18928400 |
| C | -4.35120000 | -3.68322800 | -0.98411600 |
| H | -2.20275300 | -3.71943800 | -0.87667000 |
| C | -5.35346900 | -1.50361300 | -1.20628800 |
| H | -3.99690200 | 0.16099900  | -1.24841500 |
| C | -5.48811300 | -2.88804300 | -1.11046600 |
| H | -4.44509300 | -4.76158400 | -0.90398600 |
| H | -6.23369400 | -0.87484500 | -1.29076200 |
| H | -6.47332600 | -3.34234100 | -1.12826700 |
| C | -1.46816100 | 0.35807900  | 0.91807700  |
| O | -2.14057700 | -0.66398900 | 1.54834900  |
| C | -0.93625900 | 1.38379100  | 1.82760600  |
| C | 0.29918900  | 2.00527600  | 1.58621000  |
| C | -1.65392800 | 1.71719700  | 2.98810000  |
| C | 0.77903300  | 2.96691400  | 2.46480200  |
| H | 0.88710300  | 1.72119500  | 0.72333700  |
| C | -1.17160100 | 2.68839000  | 3.85464600  |
| H | -2.60567300 | 1.24717300  | 3.19833300  |
| C | 0.04267800  | 3.31934200  | 3.59401400  |
| H | 1.73542000  | 3.44022100  | 2.26931800  |
| H | -1.74556500 | 2.95244300  | 4.73602500  |
| H | 0.41833500  | 4.07623800  | 4.27480500  |
| C | -3.50487100 | -0.54540100 | 1.71047600  |
| O | -4.07690900 | 0.48428300  | 1.47599200  |
| C | -4.13006800 | -1.82482300 | 2.18717200  |
| C | -3.17948400 | -2.93250400 | 2.62853100  |
| H | -4.83301400 | -1.55189600 | 2.98126800  |
| H | -4.74478200 | -2.16648700 | 1.34337400  |
| C | -3.95141800 | -4.20657800 | 2.95804800  |
| H | -2.59817700 | -2.60157900 | 3.49567100  |
| H | -2.46365100 | -3.12859300 | 1.82431000  |
| H | -3.27891000 | -5.00357100 | 3.28259200  |
| H | -4.49765500 | -4.56023100 | 2.07742200  |
| H | -4.67968900 | -4.03417200 | 3.75614700  |
| C | 5.23306700  | -1.74285100 | -1.69793600 |
| C | 6.37054700  | -1.88728100 | -0.95019300 |
| C | 6.48684800  | -1.21166900 | 0.29846200  |
| C | 5.37911200  | -0.41152500 | 0.69816100  |
| C | 4.27637300  | -0.31855900 | -0.10899300 |
| N | 4.20989300  | -0.97313000 | -1.28335200 |
| H | 5.10351600  | -2.23705000 | -2.65331800 |

|   |            |             |             |
|---|------------|-------------|-------------|
| H | 7.16299800 | -2.51666800 | -1.32908700 |
| H | 5.38426500 | 0.13168100  | 1.63228600  |
| H | 3.40090100 | 0.27465000  | 0.13393800  |
| N | 7.58720900 | -1.32276800 | 1.05984500  |
| C | 7.67317800 | -0.60777800 | 2.32760300  |
| H | 8.64372600 | -0.80307600 | 2.77823900  |
| H | 7.57563200 | 0.47157500  | 2.17514200  |
| H | 6.89565800 | -0.94242600 | 3.02177200  |
| C | 8.70153100 | -2.15569900 | 0.62212600  |
| H | 9.48609600 | -2.11733000 | 1.37450900  |
| H | 8.38957700 | -3.19794200 | 0.50195800  |
| H | 9.11392600 | -1.79423400 | -0.32512400 |
| H | 3.32610100 | -0.87630500 | -1.87301200 |

TS9RS-DMAP·H+

|   |             |             |             |
|---|-------------|-------------|-------------|
| C | 1.32360000  | 0.28017900  | -2.01595300 |
| O | 2.27815000  | -0.14353500 | -2.67781900 |
| C | -0.09651200 | 0.41406900  | -2.51472700 |
| C | -0.77832400 | -0.97567800 | -2.51768800 |
| H | -0.20996600 | 0.96653500  | -3.45090800 |
| C | -1.19293800 | -1.45702300 | -3.89989600 |
| H | -0.07676200 | -1.70311900 | -2.09242000 |
| H | -0.32049400 | -1.56002900 | -4.55014500 |
| H | -1.68655000 | -2.43091500 | -3.83192400 |
| H | -1.88812100 | -0.74990600 | -4.36374100 |
| C | -0.63463000 | 1.14381200  | -1.29419200 |
| O | 1.32372800  | 0.61377500  | -0.77888900 |
| C | -1.58799300 | 0.31780200  | -0.62790200 |
| C | -1.97229800 | -0.84880800 | -1.53327500 |
| H | -2.85780700 | -0.54449000 | -2.10741000 |
| C | -0.62321600 | 2.61554100  | -1.21826300 |
| C | -1.84840600 | 3.27694100  | -1.03700000 |
| C | 0.53602000  | 3.37055200  | -1.44535200 |
| C | -1.90437500 | 4.66542500  | -1.06171700 |
| H | -2.75949900 | 2.69989600  | -0.91185500 |
| C | 0.47236600  | 4.75697800  | -1.45589100 |
| H | 1.48943400  | 2.87018700  | -1.56372900 |
| C | -0.74560300 | 5.40849600  | -1.26318000 |
| H | -2.85797900 | 5.16410400  | -0.92645400 |
| H | 1.37836700  | 5.33283300  | -1.61198800 |
| H | -0.78966300 | 6.49244400  | -1.27597800 |
| C | -2.27587900 | -2.16111000 | -0.84532000 |
| C | -3.38735100 | -2.91704100 | -1.22009600 |
| C | -1.40899900 | -2.66686000 | 0.12953900  |

|   |             |             |             |
|---|-------------|-------------|-------------|
| C | -3.62886500 | -4.16154800 | -0.63666300 |
| H | -4.06640700 | -2.52733500 | -1.97536300 |
| C | -1.64669900 | -3.90655200 | 0.71172200  |
| H | -0.54116600 | -2.07970000 | 0.42557900  |
| C | -2.75879900 | -4.65851200 | 0.32880000  |
| H | -4.49552100 | -4.74072400 | -0.93948300 |
| H | -0.96643600 | -4.28902000 | 1.46576600  |
| H | -2.94470900 | -5.62548800 | 0.78457400  |
| C | -2.12751900 | 0.59796100  | 0.60696800  |
| O | -3.20843800 | -0.08482700 | 1.06042400  |
| C | -1.60877900 | 1.52482700  | 1.61681600  |
| C | -0.23757600 | 1.79117900  | 1.73010300  |
| C | -2.51535000 | 2.14521700  | 2.48968900  |
| C | 0.21046500  | 2.69332900  | 2.68529100  |
| H | 0.46503300  | 1.28509900  | 1.07787700  |
| C | -2.05893000 | 3.05295700  | 3.43463000  |
| H | -3.57470800 | 1.92572900  | 2.41122900  |
| C | -0.69584600 | 3.32995500  | 3.53148700  |
| H | 1.27189000  | 2.89848600  | 2.77435800  |
| H | -2.76363100 | 3.54328400  | 4.09722800  |
| H | -0.33907500 | 4.03734700  | 4.27300700  |
| C | -4.34924200 | -0.22997400 | 0.28256100  |
| O | -4.50787800 | 0.39656000  | -0.72598600 |
| C | -5.32504000 | -1.18433900 | 0.91385900  |
| C | -4.75619000 | -2.08615800 | 2.00640500  |
| H | -6.15576500 | -0.57536200 | 1.29281100  |
| H | -5.73608000 | -1.77353800 | 0.08708400  |
| C | -5.74147500 | -3.18864800 | 2.37838000  |
| H | -4.50784700 | -1.48186900 | 2.88436100  |
| H | -3.81958300 | -2.52852100 | 1.65475400  |
| H | -5.33786100 | -3.82236000 | 3.17123100  |
| H | -5.95067200 | -3.82589500 | 1.51307200  |
| H | -6.69202200 | -2.77460500 | 2.72857800  |
| C | 4.18995800  | -0.27865100 | 0.20348600  |
| C | 5.19420700  | -0.50831100 | 1.10621900  |
| C | 6.44343400  | -1.02626000 | 0.66200200  |
| C | 6.57252300  | -1.27663600 | -0.73390300 |
| C | 5.51912200  | -1.02154100 | -1.57068500 |
| N | 4.35370600  | -0.53215400 | -1.10835700 |
| H | 3.21516400  | 0.11425600  | 0.47402000  |
| H | 5.01404600  | -0.28847800 | 2.14880800  |
| H | 7.48617200  | -1.67064000 | -1.15555700 |
| H | 5.57262000  | -1.20190200 | -2.63766600 |
| N | 7.45037500  | -1.26816600 | 1.51702600  |

|   |            |             |             |
|---|------------|-------------|-------------|
| C | 8.72086100 | -1.78824800 | 1.02485800  |
| H | 9.40522700 | -1.89839300 | 1.86305500  |
| H | 8.58932000 | -2.76788800 | 0.55483900  |
| H | 9.17075300 | -1.10172000 | 0.30098800  |
| C | 7.27647600 | -1.01282800 | 2.94180700  |
| H | 8.18978900 | -1.28906200 | 3.46379600  |
| H | 7.07752200 | 0.04687900  | 3.13074400  |
| H | 6.45349100 | -1.60867900 | 3.34898900  |
| H | 3.53325400 | -0.35396800 | -1.77215100 |

TS9SR-DMAP·H+

|   |             |             |             |
|---|-------------|-------------|-------------|
| C | 1.28937000  | -0.20463200 | -2.03131200 |
| O | 2.10795500  | -0.98726300 | -2.53308000 |
| C | -0.12139100 | 0.01747100  | -2.54775800 |
| C | -1.07138000 | -1.18690300 | -2.49027600 |
| H | -0.10145100 | 0.50134200  | -3.52773200 |
| C | -0.52757200 | -2.49183300 | -3.05353900 |
| H | -1.96587500 | -0.90343900 | -3.05774700 |
| H | -1.29056400 | -3.27141100 | -2.97345000 |
| H | -0.25689600 | -2.38234700 | -4.10645400 |
| H | 0.36448400  | -2.81041500 | -2.50980900 |
| C | -0.58050800 | 0.92639500  | -1.41827900 |
| O | 1.46646700  | 0.54587400  | -1.01358800 |
| C | -1.29182100 | 0.13370900  | -0.45805700 |
| C | -1.49602500 | -1.28714900 | -1.00012000 |
| H | -0.78695300 | -1.94083800 | -0.47082600 |
| C | -0.70141700 | 2.37171700  | -1.58328200 |
| C | -1.86377300 | 3.02953400  | -1.14781500 |
| C | 0.29017600  | 3.09208000  | -2.26684000 |
| C | -2.01601500 | 4.38995200  | -1.38128200 |
| H | -2.65106300 | 2.46949300  | -0.65133300 |
| C | 0.13821800  | 4.45373400  | -2.47818900 |
| H | 1.19412800  | 2.58280000  | -2.58461000 |
| C | -1.01547600 | 5.10389200  | -2.03670200 |
| H | -2.91945600 | 4.89234800  | -1.05346100 |
| H | 0.91654600  | 5.01075400  | -2.98819200 |
| H | -1.13646800 | 6.16795100  | -2.21149500 |
| C | -2.87453200 | -1.90418100 | -0.89473000 |
| C | -3.02664200 | -3.21215200 | -0.42971300 |
| C | -3.99973600 | -1.22294900 | -1.37098700 |
| C | -4.27469100 | -3.83331000 | -0.44620700 |
| H | -2.15643100 | -3.75277000 | -0.06550900 |
| C | -5.24799900 | -1.83640800 | -1.38226800 |
| H | -3.89798500 | -0.19809000 | -1.72124500 |

|   |             |             |             |
|---|-------------|-------------|-------------|
| C | -5.38780400 | -3.14762400 | -0.92613100 |
| H | -4.37392700 | -4.85349900 | -0.08934200 |
| H | -6.11231500 | -1.29180700 | -1.74788400 |
| H | -6.35998000 | -3.62921100 | -0.94298400 |
| C | -1.59963000 | 0.52052700  | 0.81990200  |
| O | -2.37716900 | -0.35029500 | 1.54510900  |
| C | -1.11761500 | 1.67610900  | 1.58312600  |
| C | 0.16715200  | 2.19882000  | 1.36947100  |
| C | -1.93885000 | 2.24087000  | 2.57161800  |
| C | 0.60029100  | 3.29168000  | 2.10755100  |
| H | 0.82146200  | 1.73517800  | 0.64068100  |
| C | -1.50167700 | 3.34144500  | 3.29478500  |
| H | -2.93106500 | 1.84493400  | 2.74904500  |
| C | -0.23372100 | 3.87124500  | 3.06198400  |
| H | 1.59480700  | 3.69176000  | 1.94120300  |
| H | -2.15077300 | 3.78591300  | 4.04125200  |
| H | 0.10635400  | 4.73025800  | 3.63132400  |
| C | -3.74575500 | -0.17924200 | 1.48257700  |
| O | -4.23178200 | 0.77791400  | 0.94382900  |
| C | -4.48667700 | -1.29845000 | 2.15435800  |
| C | -3.65191500 | -2.27606100 | 2.97491900  |
| H | -5.27308300 | -0.83118500 | 2.75649100  |
| H | -5.00222700 | -1.82626000 | 1.34087300  |
| C | -4.52174200 | -3.40738300 | 3.51386200  |
| H | -3.15964600 | -1.74632700 | 3.79725900  |
| H | -2.85772500 | -2.68349900 | 2.34207600  |
| H | -3.93129300 | -4.11543200 | 4.09929600  |
| H | -4.99146000 | -3.95489400 | 2.69019700  |
| H | -5.31900000 | -3.02140200 | 4.15601800  |
| C | 4.39448100  | -0.13933500 | -0.05953100 |
| C | 5.48210900  | -0.12744600 | 0.77347700  |
| C | 6.51433000  | -1.09308900 | 0.60719600  |
| C | 6.34527800  | -2.03535400 | -0.44673000 |
| C | 5.23015800  | -1.97699500 | -1.23872900 |
| N | 4.27631900  | -1.04712600 | -1.04647400 |
| H | 3.56747300  | 0.55834000  | 0.02045500  |
| H | 5.52920500  | 0.62044000  | 1.55232100  |
| H | 7.08094100  | -2.80225900 | -0.64331700 |
| H | 5.06369500  | -2.67353700 | -2.05179300 |
| N | 7.59421000  | -1.11742900 | 1.40591400  |
| C | 8.61994700  | -2.13737200 | 1.22081000  |
| H | 9.38961500  | -2.00446400 | 1.97778100  |
| H | 8.19828500  | -3.14114300 | 1.33158700  |
| H | 9.08718000  | -2.05205000 | 0.23462400  |



|   |            |             |             |
|---|------------|-------------|-------------|
| C | 7.74223900 | -0.12783900 | 2.46608000  |
| H | 8.68810800 | -0.29635300 | 2.97589200  |
| H | 7.74926900 | 0.88680400  | 2.05597600  |
| H | 6.93385900 | -0.21166100 | 3.19948900  |
| H | 3.40644000 | -1.02281400 | -1.67033200 |

TS9SS-DMAP·H+

|   |             |             |             |
|---|-------------|-------------|-------------|
| C | 0.16643900  | -1.39573700 | -2.25929200 |
| O | -0.84228300 | -1.48920900 | -2.96823600 |
| C | 1.44057000  | -0.65817800 | -2.63547400 |
| C | 1.29256700  | 0.83667900  | -2.95931000 |
| H | 2.00719900  | -1.20714500 | -3.39190600 |
| C | 0.24569600  | 1.17209700  | -4.01237000 |
| H | 2.27187300  | 1.16141800  | -3.32926200 |
| H | 0.25922400  | 2.24358500  | -4.23055300 |
| H | 0.45857100  | 0.63359500  | -4.93947700 |
| H | -0.75664400 | 0.89630800  | -3.68222900 |
| C | 2.06323900  | -0.69363800 | -1.24861400 |
| O | 0.31177600  | -1.85214800 | -1.07142400 |
| C | 1.74041700  | 0.53466900  | -0.58980000 |
| C | 1.10798300  | 1.52414200  | -1.56547100 |
| H | 1.69348800  | 2.44922100  | -1.58537200 |
| C | 3.16821400  | -1.58663900 | -0.90607800 |
| C | 4.31076700  | -1.06060400 | -0.28398100 |
| C | 3.14059500  | -2.93711900 | -1.28376900 |
| C | 5.40175600  | -1.88227500 | -0.03089700 |
| H | 4.34706800  | -0.00587300 | -0.02926600 |
| C | 4.22614000  | -3.75505300 | -1.00857400 |
| H | 2.24521800  | -3.34218900 | -1.74331600 |
| C | 5.35764500  | -3.22881500 | -0.38338900 |
| H | 6.28746400  | -1.46940600 | 0.43924500  |
| H | 4.19394000  | -4.80434300 | -1.28116400 |
| H | 6.20834300  | -3.86979900 | -0.17637200 |
| C | -0.32086500 | 1.90590200  | -1.20625400 |
| C | -0.80661200 | 3.15579700  | -1.60345500 |
| C | -1.16998300 | 1.05459700  | -0.49473000 |
| C | -2.10694800 | 3.54871100  | -1.29839000 |
| H | -0.15563900 | 3.83085100  | -2.15522600 |
| C | -2.47149200 | 1.44550500  | -0.18679300 |
| H | -0.80630400 | 0.08437300  | -0.16447300 |
| C | -2.94414100 | 2.69349200  | -0.58478200 |
| H | -2.46355000 | 4.52446900  | -1.61258400 |
| H | -3.11318700 | 0.77102900  | 0.37522800  |
| H | -3.95486900 | 3.00107500  | -0.33731100 |

|   |             |             |             |
|---|-------------|-------------|-------------|
| C | 1.82226400  | 0.75569000  | 0.76228500  |
| O | 1.45566300  | 1.97458700  | 1.24253800  |
| C | 2.12719200  | -0.19162200 | 1.83965000  |
| C | 1.71310000  | -1.52922200 | 1.78772700  |
| C | 2.83773000  | 0.28072600  | 2.95207400  |
| C | 2.03920100  | -2.38787800 | 2.82905900  |
| H | 1.13590600  | -1.88270200 | 0.94028700  |
| C | 3.17495000  | -0.58983700 | 3.97941600  |
| H | 3.14132500  | 1.32186400  | 2.99287700  |
| C | 2.77746000  | -1.92458300 | 3.91725200  |
| H | 1.71766100  | -3.42322300 | 2.79266900  |
| H | 3.74431300  | -0.22930500 | 4.82915500  |
| H | 3.03786900  | -2.60303100 | 4.72314300  |
| C | 2.06021700  | 3.13505500  | 0.78770200  |
| O | 3.14098900  | 3.11188900  | 0.27299400  |
| C | 1.20198700  | 4.34709300  | 1.03080300  |
| C | -0.13106600 | 4.11218900  | 1.73732600  |
| H | 1.82423000  | 5.07454000  | 1.56369300  |
| H | 1.03390500  | 4.77615500  | 0.03387600  |
| C | -0.96682800 | 5.38800200  | 1.75754800  |
| H | 0.05265900  | 3.75877100  | 2.75725500  |
| H | -0.68068500 | 3.31868800  | 1.22055400  |
| H | -1.92027800 | 5.22228100  | 2.26403800  |
| H | -1.18333300 | 5.72045100  | 0.73695600  |
| H | -0.44626000 | 6.20056900  | 2.27319500  |
| C | -2.61327900 | -2.20050000 | -0.02883400 |
| C | -3.60348800 | -2.20062200 | 0.91867900  |
| C | -4.91534400 | -1.76449100 | 0.57476900  |
| C | -5.11181500 | -1.32199200 | -0.76496600 |
| C | -4.06757600 | -1.34914000 | -1.65043300 |
| N | -2.84907400 | -1.78936400 | -1.28871800 |
| H | -1.59296200 | -2.51196000 | 0.16825200  |
| H | -3.36513100 | -2.54103900 | 1.91635200  |
| H | -6.07124500 | -0.96065800 | -1.10659100 |
| H | -4.16892600 | -1.01667600 | -2.67665800 |
| N | -5.91636400 | -1.76534700 | 1.46904100  |
| C | -7.24880000 | -1.32068500 | 1.07688500  |
| H | -7.91940400 | -1.42229200 | 1.92712400  |
| H | -7.23919500 | -0.27038500 | 0.76862100  |
| H | -7.63870100 | -1.93037000 | 0.25601800  |
| C | -5.67678600 | -2.21494400 | 2.83570600  |
| H | -6.60261700 | -2.13407300 | 3.40067400  |
| H | -5.35113900 | -3.25971800 | 2.85411600  |
| H | -4.91860300 | -1.59526700 | 3.32463300  |

|               |             |             |             |
|---------------|-------------|-------------|-------------|
| H             | -2.04930100 | -1.76838300 | -1.99277600 |
| TS9RR-nPrCOOH |             |             |             |
| C             | -1.86649700 | -1.23463400 | -0.71806000 |
| O             | -2.36198700 | -2.24969500 | -1.22898500 |
| C             | -1.14508500 | -1.29915900 | 0.63303600  |
| C             | 0.00512400  | -2.30650700 | 0.69208500  |
| H             | -1.89509300 | -1.42771100 | 1.41839000  |
| C             | 0.28905500  | -2.71692800 | 2.13577600  |
| H             | -0.27595000 | -3.19273600 | 0.11532100  |
| H             | -0.59964300 | -3.20075300 | 2.54986600  |
| H             | 1.12642800  | -3.41426700 | 2.20618500  |
| H             | 0.51796900  | -1.84919600 | 2.76478200  |
| C             | -0.50334500 | 0.06108500  | 0.61137900  |
| O             | -1.85538600 | -0.05095800 | -1.16073300 |
| C             | 0.80979800  | -0.07762000 | 0.04875000  |
| C             | 1.17829800  | -1.56581200 | -0.04111100 |
| H             | 1.12890400  | -1.83136900 | -1.10549100 |
| C             | -0.99871300 | 1.19046300  | 1.37498600  |
| C             | -0.09914800 | 2.07646500  | 1.99488700  |
| C             | -2.38264300 | 1.34385300  | 1.56741900  |
| C             | -0.58217700 | 3.11134200  | 2.78166800  |
| H             | 0.97094900  | 1.93347100  | 1.87522500  |
| C             | -2.85283500 | 2.39495800  | 2.34050300  |
| H             | -3.07192900 | 0.66052500  | 1.07726600  |
| C             | -1.95706100 | 3.27666000  | 2.94693900  |
| H             | 0.11211500  | 3.78798800  | 3.26780400  |
| H             | -3.92119200 | 2.52630800  | 2.47413800  |
| H             | -2.33151400 | 4.09172300  | 3.55839900  |
| C             | 2.54264700  | -1.97671800 | 0.46727500  |
| C             | 3.25152200  | -2.97429600 | -0.20772100 |
| C             | 3.07731400  | -1.46229400 | 1.65317900  |
| C             | 4.45947900  | -3.45713100 | 0.29168600  |
| H             | 2.84544800  | -3.38267300 | -1.12988600 |
| C             | 4.28543400  | -1.93892900 | 2.15416100  |
| H             | 2.55135300  | -0.67039200 | 2.18007000  |
| C             | 4.97818400  | -2.94256800 | 1.47824600  |
| H             | 4.99139300  | -4.23687800 | -0.24432000 |
| H             | 4.68629500  | -1.52397400 | 3.07321300  |
| H             | 5.91773000  | -3.31706000 | 1.87139300  |
| C             | 1.53451500  | 0.91932100  | -0.54539900 |
| O             | 2.76823500  | 0.54579000  | -1.03685500 |
| C             | 1.12908300  | 2.28780300  | -0.89758100 |
| C             | -0.18571100 | 2.55599200  | -1.30638600 |

|   |             |             |             |
|---|-------------|-------------|-------------|
| C | 2.07649800  | 3.32375100  | -0.88204300 |
| C | -0.54811300 | 3.85024500  | -1.65786700 |
| H | -0.90751000 | 1.74910200  | -1.37096300 |
| C | 1.69801000  | 4.61546700  | -1.22021700 |
| H | 3.09484200  | 3.12840100  | -0.56971700 |
| C | 0.38530300  | 4.88236500  | -1.60600600 |
| H | -1.56446900 | 4.04864400  | -1.98086300 |
| H | 2.42986800  | 5.41552000  | -1.18511400 |
| H | 0.09478000  | 5.89281400  | -1.87562600 |
| C | 3.87421800  | 0.71565800  | -0.24229500 |
| O | 3.82985300  | 1.34520200  | 0.78126500  |
| C | 5.08444900  | 0.02292800  | -0.80246200 |
| C | 4.96494000  | -0.53512000 | -2.21681000 |
| H | 5.91807800  | 0.72743300  | -0.71233400 |
| H | 5.29450900  | -0.78890600 | -0.09278700 |
| C | 6.21422200  | -1.32662800 | -2.59208300 |
| H | 4.79999800  | 0.28077100  | -2.92813900 |
| H | 4.08446200  | -1.18231200 | -2.27085000 |
| H | 6.13579700  | -1.73269000 | -3.60299000 |
| H | 6.35733600  | -2.16312500 | -1.90002900 |
| H | 7.10992700  | -0.69938800 | -2.54864500 |
| O | -4.47288700 | -0.91510100 | 0.49010500  |
| C | -5.22161900 | -1.11417100 | -0.45199900 |
| O | -4.85178000 | -1.66857700 | -1.59101200 |
| C | -6.68412700 | -0.72547100 | -0.43407200 |
| C | -7.61532100 | -1.78891500 | -1.01789800 |
| H | -6.78024600 | 0.20090700  | -1.01538500 |
| H | -6.94605600 | -0.48995100 | 0.60074800  |
| C | -9.07745400 | -1.35939500 | -0.94491200 |
| H | -7.32514700 | -1.98228200 | -2.05422500 |
| H | -7.47567100 | -2.73038100 | -0.47454900 |
| H | -9.73805300 | -2.12123500 | -1.36625700 |
| H | -9.38415700 | -1.18422000 | 0.09116500  |
| H | -9.23944900 | -0.42982100 | -1.50007100 |
| H | -3.86994800 | -1.90193700 | -1.54831300 |

TS9RS-nPrCOOH

|   |             |             |            |
|---|-------------|-------------|------------|
| C | -1.85052000 | -1.51331900 | 0.56381700 |
| O | -2.71149900 | -2.38647500 | 0.73617800 |
| C | -0.74352200 | -1.24080100 | 1.57966700 |
| C | 0.44307100  | -2.19868600 | 1.33138200 |
| H | -1.08181700 | -1.21604400 | 2.61929400 |
| C | 0.66392900  | -3.21391800 | 2.44121500 |
| H | 0.25467300  | -2.73627000 | 0.39456200 |

|   |             |             |             |
|---|-------------|-------------|-------------|
| H | -0.21637200 | -3.85203400 | 2.55353400  |
| H | 1.52441800  | -3.85070800 | 2.21467200  |
| H | 0.84886000  | -2.70976400 | 3.39555600  |
| C | -0.29373800 | 0.10469300  | 1.06138000  |
| O | -1.69122000 | -0.74513700 | -0.43268400 |
| C | 1.04270600  | 0.01785600  | 0.58173800  |
| C | 1.67003400  | -1.27701200 | 1.09056700  |
| H | 2.13966200  | -1.06490600 | 2.06091200  |
| C | -0.96678900 | 1.34470500  | 1.45171800  |
| C | -0.19116600 | 2.42844000  | 1.90002400  |
| C | -2.36758000 | 1.43500200  | 1.48651100  |
| C | -0.80729600 | 3.59022900  | 2.34490400  |
| H | 0.89007700  | 2.33654200  | 1.93657300  |
| C | -2.97111800 | 2.60745900  | 1.91913300  |
| H | -2.99304200 | 0.62239400  | 1.13125500  |
| C | -2.19723700 | 3.68660300  | 2.34481000  |
| H | -0.20126200 | 4.41824600  | 2.69697700  |
| H | -4.05407600 | 2.67111000  | 1.91372300  |
| H | -2.67641800 | 4.59932800  | 2.68508400  |
| C | 2.69477600  | -1.93356500 | 0.19386700  |
| C | 3.89921900  | -2.40162300 | 0.72042700  |
| C | 2.41633400  | -2.15202500 | -1.16048100 |
| C | 4.81112500  | -3.08332300 | -0.08640200 |
| H | 4.11916000  | -2.23349100 | 1.77260300  |
| C | 3.32156200  | -2.83365300 | -1.96574200 |
| H | 1.47683800  | -1.79059400 | -1.57546200 |
| C | 4.52254100  | -3.30244500 | -1.42981500 |
| H | 5.74182700  | -3.44726900 | 0.33802900  |
| H | 3.09179700  | -3.00170600 | -3.01296000 |
| H | 5.22812600  | -3.83500800 | -2.05931800 |
| C | 1.66215700  | 0.97490600  | -0.18976500 |
| O | 3.00846300  | 0.94958800  | -0.37199700 |
| C | 1.02343700  | 2.01769200  | -0.99573800 |
| C | -0.25571300 | 1.83127800  | -1.53931200 |
| C | 1.72215900  | 3.21090400  | -1.23508600 |
| C | -0.83396400 | 2.84892400  | -2.28707800 |
| H | -0.78386500 | 0.89593800  | -1.38247300 |
| C | 1.13015100  | 4.22403300  | -1.97440900 |
| H | 2.71808900  | 3.34143800  | -0.82518100 |
| C | -0.15016700 | 4.04434900  | -2.49873500 |
| H | -1.82227600 | 2.70419700  | -2.70947900 |
| H | 1.66364400  | 5.15298900  | -2.14454900 |
| H | -0.61157500 | 4.83644500  | -3.07986900 |
| C | 3.87572400  | 0.81330500  | 0.69995700  |

|   |             |             |             |
|---|-------------|-------------|-------------|
| O | 3.50406900  | 0.90827300  | 1.83507700  |
| C | 5.29390600  | 0.61482900  | 0.23586400  |
| C | 5.46418900  | 0.22201900  | -1.22915900 |
| H | 5.82908700  | 1.54578900  | 0.46288100  |
| H | 5.71599100  | -0.14599500 | 0.90091000  |
| C | 6.89547600  | -0.21684000 | -1.51871800 |
| H | 5.18637100  | 1.06677600  | -1.86721500 |
| H | 4.77214400  | -0.59111800 | -1.46605500 |
| H | 7.02058800  | -0.47110800 | -2.57376900 |
| H | 7.15301100  | -1.10182000 | -0.92779400 |
| H | 7.61380600  | 0.57228300  | -1.27450900 |
| O | -4.92773800 | -0.10106100 | 0.49162500  |
| C | -5.36866500 | -0.86198900 | -0.35160700 |
| O | -4.79104900 | -1.98917500 | -0.71743000 |
| C | -6.65761600 | -0.59813000 | -1.10217700 |
| C | -7.60199800 | -1.80183100 | -1.12450900 |
| H | -6.39139500 | -0.32830600 | -2.13218900 |
| H | -7.13438400 | 0.27185900  | -0.64345800 |
| C | -8.89692000 | -1.49300800 | -1.87015300 |
| H | -7.08529200 | -2.64589900 | -1.58951900 |
| H | -7.82849000 | -2.10214500 | -0.09496700 |
| H | -9.56610000 | -2.35718500 | -1.88052300 |
| H | -9.43024900 | -0.65994100 | -1.40148800 |
| H | -8.69187700 | -1.21409500 | -2.90875400 |
| H | -3.93881600 | -2.13837700 | -0.18174900 |

TS9SR-nPrCOOH

|   |             |             |             |
|---|-------------|-------------|-------------|
| C | -1.86468400 | -1.53150100 | -0.28798700 |
| O | -2.51185200 | -2.56023800 | -0.54302500 |
| C | -0.94357100 | -1.46580800 | 0.94179400  |
| C | 0.30309400  | -2.36503300 | 0.90693300  |
| H | -1.54510500 | -1.59823000 | 1.84456500  |
| C | 0.07755000  | -3.80220400 | 0.46048400  |
| H | 0.71908300  | -2.37341000 | 1.92267600  |
| H | -0.33294400 | -3.83755300 | -0.55088800 |
| H | 1.02635300  | -4.34721800 | 0.48382500  |
| H | -0.63002100 | -4.30964000 | 1.12043000  |
| C | -0.40205100 | -0.07058400 | 0.77184400  |
| O | -1.86343900 | -0.43387800 | -0.91014700 |
| C | 0.85939600  | -0.13966400 | 0.10671200  |
| C | 1.31687000  | -1.59920100 | 0.01209000  |
| H | 1.17507300  | -1.91230400 | -1.03217100 |
| C | -0.92795100 | 1.06843500  | 1.50200400  |
| C | -0.05091800 | 2.02121600  | 2.05209400  |

|   |             |             |             |
|---|-------------|-------------|-------------|
| C | -2.30986800 | 1.16507000  | 1.73602400  |
| C | -0.55738800 | 3.06492900  | 2.81229400  |
| H | 1.02069900  | 1.92014300  | 1.90424000  |
| C | -2.80388900 | 2.22670200  | 2.47976400  |
| H | -2.98850700 | 0.43962400  | 1.29425500  |
| C | -1.93245900 | 3.17401600  | 3.01863400  |
| H | 0.12032900  | 3.79165200  | 3.24693900  |
| H | -3.87321100 | 2.31281800  | 2.64003800  |
| H | -2.32519900 | 3.99626500  | 3.60871600  |
| C | 2.73635700  | -1.92187200 | 0.42106700  |
| C | 3.53310700  | -2.74864200 | -0.37431800 |
| C | 3.23712000  | -1.48889100 | 1.65386900  |
| C | 4.79918400  | -3.14556600 | 0.05473700  |
| H | 3.15085700  | -3.09535900 | -1.33118400 |
| C | 4.50234800  | -1.87680700 | 2.08261900  |
| H | 2.63147500  | -0.83241600 | 2.27491000  |
| C | 5.28528100  | -2.71351900 | 1.28648600  |
| H | 5.40110600  | -3.79655100 | -0.57157700 |
| H | 4.87725400  | -1.52688200 | 3.03888000  |
| H | 6.26875300  | -3.02364200 | 1.62424200  |
| C | 1.48139700  | 0.90501100  | -0.52624200 |
| O | 2.74927000  | 0.65951300  | -1.00278400 |
| C | 0.93261500  | 2.20714600  | -0.91071900 |
| C | -0.41583900 | 2.32543400  | -1.28103600 |
| C | 1.77454200  | 3.32921100  | -0.96217200 |
| C | -0.91490000 | 3.56327800  | -1.66479000 |
| H | -1.05333400 | 1.44694300  | -1.28516200 |
| C | 1.25955000  | 4.56352000  | -1.33008100 |
| H | 2.81678600  | 3.24202500  | -0.67830200 |
| C | -0.08535900 | 4.68265000  | -1.67990700 |
| H | -1.95518400 | 3.65070600  | -1.95893000 |
| H | 1.90643300  | 5.43399500  | -1.34714800 |
| H | -0.48319100 | 5.64855300  | -1.97476700 |
| C | 3.80763900  | 0.91528400  | -0.16193500 |
| O | 3.65862400  | 1.48954600  | 0.88343400  |
| C | 5.10529900  | 0.40035500  | -0.71571400 |
| C | 5.09778000  | -0.03439300 | -2.17759400 |
| H | 5.85373200  | 1.17694700  | -0.52691800 |
| H | 5.37372300  | -0.44636900 | -0.06985400 |
| C | 6.45340500  | -0.60715900 | -2.57899100 |
| H | 4.83710900  | 0.81579600  | -2.81681800 |
| H | 4.31683100  | -0.78695300 | -2.32125300 |
| H | 6.45495000  | -0.92145400 | -3.62504100 |
| H | 6.69977700  | -1.47814100 | -1.96276800 |

|   |             |             |             |
|---|-------------|-------------|-------------|
| H | 7.25009600  | 0.13143700  | -2.44746100 |
| O | -4.66245500 | -0.73827300 | 0.67570500  |
| C | -5.29527000 | -1.02516900 | -0.32596500 |
| O | -4.84789200 | -1.80164200 | -1.29311100 |
| C | -6.69119800 | -0.50130600 | -0.59115800 |
| C | -7.66311300 | -1.56551700 | -1.10265500 |
| H | -6.60126700 | 0.29733500  | -1.33909000 |
| H | -7.05154700 | -0.04519600 | 0.33452700  |
| C | -9.05570300 | -0.99041100 | -1.34357200 |
| H | -7.26221700 | -1.99479500 | -2.02483300 |
| H | -7.71913200 | -2.38379500 | -0.37562300 |
| H | -9.74520700 | -1.75544900 | -1.70939500 |
| H | -9.47368600 | -0.57419400 | -0.42147700 |
| H | -9.02212300 | -0.18595100 | -2.08544600 |
| H | -3.90681900 | -2.11301000 | -1.07039100 |

TS9SS-nPrCOOH

|   |             |             |             |
|---|-------------|-------------|-------------|
| C | 1.44566400  | -1.36572500 | -0.80418100 |
| O | 1.97298600  | -2.48125100 | -0.91128400 |
| C | 0.72639000  | -0.69565300 | -1.98349700 |
| C | -0.56915100 | -1.36250900 | -2.47911700 |
| H | 1.44783700  | -0.52040100 | -2.78584300 |
| C | -0.49528500 | -2.87552300 | -2.63682900 |
| H | -0.78199700 | -0.92657500 | -3.46208400 |
| H | -1.44121800 | -3.26033000 | -3.02938900 |
| H | 0.30454500  | -3.14210900 | -3.33227000 |
| H | -0.28566300 | -3.36739000 | -1.68572000 |
| C | 0.27286700  | 0.56713200  | -1.29534000 |
| O | 1.42507700  | -0.60646100 | 0.21077000  |
| C | -1.07911700 | 0.39976000  | -0.87159700 |
| C | -1.69382400 | -0.83698000 | -1.52075500 |
| H | -2.53466400 | -0.53007800 | -2.14913300 |
| C | 1.00230000  | 1.82255300  | -1.40327300 |
| C | 0.30097200  | 3.01803500  | -1.63135400 |
| C | 2.40572000  | 1.82980400  | -1.35748300 |
| C | 0.99438900  | 4.20945900  | -1.78653600 |
| H | -0.78152000 | 2.99812800  | -1.71015700 |
| C | 3.08678400  | 3.03112500  | -1.49444800 |
| H | 2.94862300  | 0.90878400  | -1.16056200 |
| C | 2.38632100  | 4.21873200  | -1.70695900 |
| H | 0.45143000  | 5.12988000  | -1.97224400 |
| H | 4.16975400  | 3.03795700  | -1.43350400 |
| H | 2.92638300  | 5.15362800  | -1.81922300 |
| C | -2.22773600 | -1.84965700 | -0.52390500 |



|   |             |             |             |
|---|-------------|-------------|-------------|
| C | -3.39439100 | -2.55491800 | -0.83066900 |
| C | -1.56653700 | -2.12571800 | 0.67737200  |
| C | -3.89419600 | -3.52255500 | 0.03892700  |
| H | -3.91178100 | -2.34575500 | -1.76516600 |
| C | -2.06466400 | -3.09349500 | 1.54597000  |
| H | -0.65468400 | -1.58737900 | 0.92857500  |
| C | -3.22893000 | -3.79321600 | 1.23179800  |
| H | -4.80064400 | -4.06302500 | -0.21610200 |
| H | -1.53870200 | -3.30216400 | 2.47199800  |
| H | -3.61481700 | -4.54425600 | 1.91351300  |
| C | -1.67738800 | 1.14307100  | 0.11908700  |
| O | -2.95971400 | 0.89247900  | 0.48918700  |
| C | -1.06525300 | 2.14177200  | 1.00862400  |
| C | 0.22331800  | 1.97313200  | 1.52949200  |
| C | -1.82190200 | 3.27140900  | 1.34935500  |
| C | 0.75682900  | 2.95478300  | 2.35543800  |
| H | 0.79109400  | 1.07987200  | 1.28960400  |
| C | -1.27162100 | 4.25480700  | 2.15950500  |
| H | -2.82830400 | 3.38179300  | 0.95764700  |
| C | 0.02003200  | 4.09749700  | 2.66098900  |
| H | 1.75296800  | 2.82438700  | 2.76428000  |
| H | -1.84901900 | 5.13961100  | 2.40511200  |
| H | 0.44819200  | 4.86323300  | 3.30000000  |
| C | -4.00238800 | 0.77378500  | -0.41014500 |
| O | -3.92389700 | 1.19648900  | -1.52840400 |
| C | -5.20509600 | 0.12612400  | 0.22449000  |
| C | -4.97573300 | -0.52189900 | 1.58779400  |
| H | -5.98690800 | 0.89425500  | 0.27278100  |
| H | -5.55462500 | -0.61270900 | -0.50539400 |
| C | -6.18536400 | -1.34883600 | 2.01100200  |
| H | -4.76447200 | 0.25467000  | 2.32968000  |
| H | -4.08911000 | -1.16151000 | 1.54019400  |
| H | -6.02394100 | -1.80347200 | 2.99108100  |
| H | -6.36732700 | -2.15549600 | 1.29348000  |
| H | -7.09102100 | -0.73634000 | 2.06664400  |
| O | 4.42297200  | -0.61963600 | -0.78203700 |
| C | 4.74264100  | -1.30088100 | 0.17643200  |
| O | 4.06206000  | -2.34540900 | 0.60896000  |
| C | 5.97124400  | -1.01193500 | 1.01313200  |
| C | 6.76789000  | -2.25649700 | 1.40562200  |
| H | 5.62727000  | -0.49997500 | 1.92171600  |
| H | 6.58828800  | -0.30344000 | 0.45415100  |
| C | 7.99784000  | -1.90010200 | 2.23539200  |
| H | 6.11401700  | -2.93288100 | 1.96299600  |

|   |            |             |            |
|---|------------|-------------|------------|
| H | 7.07181600 | -2.79299400 | 0.49961500 |
| H | 8.56281000 | -2.79281200 | 2.51529800 |
| H | 8.66885400 | -1.23842600 | 1.67845000 |
| H | 7.71019200 | -1.38192500 | 3.15598700 |
| H | 3.22472500 | -2.45573400 | 0.05045900 |

Coordinates for the chemoselective pathway

TS4RR-HDA

|    |             |             |             |
|----|-------------|-------------|-------------|
| C  | -0.70484700 | 3.63105400  | -0.76508200 |
| C  | -1.75757000 | 4.41490300  | -1.24246400 |
| C  | -1.63829400 | 5.79635000  | -1.28789200 |
| C  | -0.44458300 | 6.38256200  | -0.86465000 |
| C  | 0.61120600  | 5.59533000  | -0.40929600 |
| C  | 0.48983000  | 4.20575500  | -0.35248400 |
| C  | -1.13889200 | 2.17617600  | -0.79615300 |
| C  | -2.22606900 | 2.18612400  | -1.89414800 |
| C  | -2.90858900 | 3.53802200  | -1.67922100 |
| H  | -2.45245600 | 6.40971500  | -1.66207500 |
| H  | -0.33252200 | 7.46135800  | -0.90248300 |
| H  | 1.53829100  | 6.06418600  | -0.09641000 |
| H  | 1.31166000  | 3.59456100  | 0.00913500  |
| H  | -2.91475200 | 1.33527200  | -1.81100700 |
| H  | -3.39749300 | 3.87413800  | -2.59635200 |
| H  | -1.60920100 | 1.86176800  | 0.13890500  |
| H  | -3.66277300 | 3.44239000  | -0.88982700 |
| C  | 0.11383100  | 0.78159800  | -2.41554200 |
| C  | 0.95887700  | 0.74990700  | -0.38406900 |
| N  | 1.20251300  | 0.08806600  | -2.52546400 |
| N  | -0.07367000 | 1.21832600  | -1.12680600 |
| N  | 1.71771300  | 0.07314300  | -1.26314800 |
| C  | -0.89063600 | 1.07120100  | -3.49020400 |
| H  | -0.37175600 | 1.24334500  | -4.43420200 |
| H  | -1.54429400 | 0.19425100  | -3.60487000 |
| C  | 2.99896600  | -0.52308200 | -1.08196900 |
| C  | 4.11645600  | 0.27892700  | -0.83230500 |
| C  | 3.17413400  | -1.89225100 | -1.27785000 |
| C  | 5.37744800  | -0.27744100 | -0.69328200 |
| C  | 4.43482000  | -2.46779300 | -1.14801600 |
| C  | 5.51445000  | -1.65351300 | -0.84280600 |
| H  | 6.23342400  | 0.35012200  | -0.47923300 |
| H  | 4.56206500  | -3.53375000 | -1.28853400 |
| Cl | 3.94573900  | 1.99884600  | -0.73078300 |
| Cl | 7.08810100  | -2.36724500 | -0.66781500 |
| Cl | 1.84240500  | -2.90124200 | -1.70948000 |

|   |             |             |             |
|---|-------------|-------------|-------------|
| O | -1.62723600 | 2.22817600  | -3.18089600 |
| C | 1.32263400  | 0.91203600  | 1.07888400  |
| O | 2.36373300  | 0.32354400  | 1.43791700  |
| C | 0.50278900  | 1.71965300  | 1.86888000  |
| C | 1.02745700  | 2.16638600  | 3.20324200  |
| H | -0.26913600 | 2.33121700  | 1.42601200  |
| C | 0.06337100  | 3.10906900  | 3.91582900  |
| H | 1.25980200  | 1.29863800  | 3.83130200  |
| H | 1.99425000  | 2.66799700  | 3.04548400  |
| H | 0.46179700  | 3.43695800  | 4.87922900  |
| H | -0.13032800 | 3.99900700  | 3.30702800  |
| H | -0.89855000 | 2.61994200  | 4.10065800  |
| C | -3.10896600 | -0.18457800 | 0.82411300  |
| O | -3.41570100 | 1.00800500  | 0.85528800  |
| C | -1.74720400 | -0.64860100 | 1.19451700  |
| C | -1.24275300 | -0.02448700 | 2.34421400  |
| H | -1.90299700 | 0.78165100  | 2.66610200  |
| C | -4.17693900 | -1.18796800 | 0.50311400  |
| C | -4.11203600 | -2.50883600 | 0.95122500  |
| C | -5.27620800 | -0.76366000 | -0.24742200 |
| C | -5.12320100 | -3.40522300 | 0.62324600  |
| H | -3.26925500 | -2.83056200 | 1.55577500  |
| C | -6.28169600 | -1.66162900 | -0.58282600 |
| H | -5.31875600 | 0.27407300  | -0.56422800 |
| C | -6.20221700 | -2.98536600 | -0.15164200 |
| H | -5.06947900 | -4.43132900 | 0.97168600  |
| H | -7.12773100 | -1.33432800 | -1.17855100 |
| H | -6.98616900 | -3.68870400 | -0.41449500 |
| C | -0.44932500 | -0.52660300 | 3.48353100  |
| C | 0.72493700  | -1.29835700 | 3.44744300  |
| C | -0.95075600 | -0.14432500 | 4.74330600  |
| C | 1.34314500  | -1.68160300 | 4.63470200  |
| H | 1.16734500  | -1.55212200 | 2.49868400  |
| C | -0.33756800 | -0.54263200 | 5.92284600  |
| H | -1.84842300 | 0.46674800  | 4.79167800  |
| C | 0.81861700  | -1.31822000 | 5.87129400  |
| H | 2.25682600  | -2.26544000 | 4.58619500  |
| H | -0.75646000 | -0.24091200 | 6.87750200  |
| H | 1.31217000  | -1.62584900 | 6.78798700  |
| C | -1.00213700 | -1.66667400 | 0.46136200  |
| O | 0.16732100  | -1.91885200 | 0.74883900  |
| C | -1.55814700 | -2.37828700 | -0.74413300 |
| C | -2.26946900 | -1.72856600 | -1.75063600 |
| C | -1.25816100 | -3.73481100 | -0.89010900 |

|   |             |             |             |
|---|-------------|-------------|-------------|
| C | -2.70478100 | -2.42291700 | -2.87529000 |
| H | -2.49536500 | -0.67217200 | -1.64577400 |
| C | -1.70147300 | -4.43601900 | -2.00600600 |
| H | -0.67283200 | -4.22461100 | -0.11798800 |
| C | -2.42711200 | -3.78154200 | -3.00060300 |
| H | -3.26438200 | -1.90545000 | -3.64891300 |
| H | -1.47839800 | -5.49363100 | -2.10384800 |
| H | -2.77114700 | -4.32872500 | -3.87237000 |

TS4RS-HDA

|    |             |             |             |
|----|-------------|-------------|-------------|
| C  | 0.59609000  | -2.90207500 | -1.83415100 |
| C  | 1.55817300  | -3.32827800 | -2.75247100 |
| C  | 1.59100100  | -4.65178100 | -3.16818500 |
| C  | 0.63891600  | -5.53940900 | -2.66429100 |
| C  | -0.33215300 | -5.10486700 | -1.76424700 |
| C  | -0.36189700 | -3.77623900 | -1.33751500 |
| C  | 0.82924000  | -1.43043900 | -1.54254200 |
| C  | 1.56960000  | -0.95758300 | -2.81524700 |
| C  | 2.43130800  | -2.16844500 | -3.17490800 |
| H  | 2.33262000  | -4.98797300 | -3.88658600 |
| H  | 0.64679600  | -6.57560000 | -2.98686700 |
| H  | -1.07390400 | -5.80321500 | -1.39131000 |
| H  | -1.11618300 | -3.44178200 | -0.63125600 |
| H  | 2.15403700  | -0.04641300 | -2.64336600 |
| H  | 2.67794300  | -2.16521900 | -4.23895900 |
| H  | 1.48579700  | -1.27058200 | -0.68475500 |
| H  | 3.36152300  | -2.13268900 | -2.59660000 |
| C  | -0.96394300 | 0.08432700  | -2.34799500 |
| C  | -1.24343900 | -0.59939100 | -0.27861400 |
| N  | -2.12130400 | 0.55388600  | -2.00157800 |
| N  | -0.39254300 | -0.63976100 | -1.32982300 |
| N  | -2.28399700 | 0.12614200  | -0.71798700 |
| C  | -0.24504800 | 0.28950700  | -3.64668100 |
| H  | -0.96787600 | 0.31386300  | -4.46316700 |
| H  | 0.27933600  | 1.25605200  | -3.60951900 |
| C  | -3.53425000 | 0.38920600  | -0.08646200 |
| C  | -4.45252300 | -0.64492100 | 0.11177000  |
| C  | -3.89851100 | 1.69565200  | 0.23326800  |
| C  | -5.69491000 | -0.39647400 | 0.67125700  |
| C  | -5.14368200 | 1.96567000  | 0.79201000  |
| C  | -6.01980000 | 0.91298800  | 1.00976500  |
| H  | -6.39510600 | -1.20553000 | 0.83557600  |
| H  | -5.41535400 | 2.98190000  | 1.04877900  |
| Cl | -4.05117300 | -2.26298800 | -0.35556400 |

|    |             |             |             |
|----|-------------|-------------|-------------|
| Cl | -7.57769300 | 1.23647500  | 1.70794600  |
| Cl | -2.80912000 | 2.99970800  | -0.06527200 |
| O  | 0.64675900  | -0.77204300 | -3.87937200 |
| C  | -1.17145100 | -1.16980200 | 1.12150500  |
| O  | -2.13381200 | -0.87969800 | 1.85250200  |
| C  | -0.05466200 | -1.94654600 | 1.47810900  |
| C  | -0.17560900 | -2.67984900 | 2.78966100  |
| H  | 0.58198900  | -2.38063800 | 0.71905600  |
| C  | 0.59397100  | -3.99811500 | 2.82417600  |
| H  | 0.15013200  | -2.04048800 | 3.62413500  |
| H  | -1.24292100 | -2.85549800 | 2.97192900  |
| H  | 0.39811600  | -4.53895300 | 3.75420000  |
| H  | 0.29226400  | -4.64044500 | 1.98956900  |
| H  | 1.67273100  | -3.83574600 | 2.75034600  |
| C  | 2.99562500  | 0.79618500  | 0.18428300  |
| O  | 3.41838400  | -0.13238500 | -0.50402900 |
| C  | 1.73433800  | 0.70446300  | 0.95542700  |
| C  | 1.51487000  | -0.28088100 | 1.92633000  |
| H  | 0.74255100  | -0.00104000 | 2.64108000  |
| C  | 3.81283000  | 2.05140500  | 0.27189400  |
| C  | 3.65191200  | 2.97750200  | 1.30498900  |
| C  | 4.79090100  | 2.26695500  | -0.70347500 |
| C  | 4.45356900  | 4.11403700  | 1.35256600  |
| H  | 2.90688400  | 2.80164400  | 2.07510700  |
| C  | 5.58543300  | 3.40456200  | -0.65969000 |
| H  | 4.91059200  | 1.52773500  | -1.48885100 |
| C  | 5.41593500  | 4.33081300  | 0.36929800  |
| H  | 4.32830500  | 4.83000800  | 2.15807500  |
| H  | 6.33790100  | 3.57177900  | -1.42356500 |
| H  | 6.03672600  | 5.22050700  | 0.40545000  |
| C  | 2.53794500  | -1.21080700 | 2.45795200  |
| C  | 3.33713300  | -2.05119400 | 1.66891700  |
| C  | 2.68453100  | -1.27069500 | 3.85140300  |
| C  | 4.26906200  | -2.89845900 | 2.25866800  |
| H  | 3.21661200  | -2.05386900 | 0.59270500  |
| C  | 3.61651200  | -2.11867200 | 4.44024400  |
| H  | 2.06054100  | -0.63704000 | 4.47554400  |
| C  | 4.41556800  | -2.93462200 | 3.64371800  |
| H  | 4.87479500  | -3.54473600 | 1.63147900  |
| H  | 3.71371300  | -2.14513400 | 5.52077200  |
| H  | 5.13985000  | -3.60282800 | 4.09847800  |
| C  | 0.67698800  | 1.71218000  | 0.85083200  |
| O  | -0.34768700 | 1.62463900  | 1.52951100  |
| C  | 0.75744200  | 2.84928100  | -0.13108300 |

|   |             |            |             |
|---|-------------|------------|-------------|
| C | 1.28898600  | 2.71710000 | -1.41380100 |
| C | 0.19716500  | 4.07177800 | 0.24987300  |
| C | 1.26962200  | 3.78873100 | -2.30287100 |
| H | 1.72160300  | 1.77033100 | -1.72332400 |
| C | 0.19009600  | 5.14818300 | -0.62917800 |
| H | -0.23818500 | 4.15376300 | 1.24093900  |
| C | 0.72428000  | 5.00769400 | -1.90999600 |
| H | 1.68563700  | 3.67179000 | -3.29902900 |
| H | -0.23559600 | 6.09718200 | -0.31880900 |
| H | 0.71464800  | 5.84652700 | -2.59838000 |

TS4SR-HDA

|   |             |             |             |
|---|-------------|-------------|-------------|
| C | 4.35933600  | 0.68333400  | 1.42469500  |
| C | 5.41770400  | 1.56864700  | 1.23642100  |
| C | 6.71496300  | 1.18065800  | 1.56146200  |
| C | 6.92729400  | -0.09784900 | 2.07217000  |
| C | 5.85748600  | -0.97389800 | 2.27257200  |
| C | 4.55763800  | -0.58791000 | 1.95512000  |
| C | 3.05036800  | 1.31168300  | 0.99917300  |
| C | 3.46321500  | 2.64529600  | 0.28439500  |
| C | 4.92989600  | 2.89331800  | 0.70601100  |
| H | 7.54765300  | 1.86277300  | 1.41694900  |
| H | 7.93446700  | -0.41471100 | 2.32401800  |
| H | 6.04016000  | -1.95979200 | 2.68784800  |
| H | 3.70635700  | -1.23791500 | 2.13521700  |
| H | 2.78864800  | 3.44239600  | 0.59621600  |
| H | 5.50584700  | 3.26540400  | -0.14699900 |
| H | 2.36212600  | 1.48943900  | 1.82319000  |
| H | 4.97607500  | 3.65977100  | 1.48692400  |
| C | 2.73357300  | 0.35858500  | -1.25965100 |
| C | 1.38514300  | -0.46889100 | 0.24461800  |
| N | 2.08361900  | -0.57244500 | -1.89485600 |
| N | 2.35096500  | 0.43463400  | 0.05012600  |
| N | 1.24598200  | -1.08520900 | -0.94021000 |
| C | 3.69492900  | 1.39541900  | -1.74450000 |
| H | 4.72821300  | 1.10404300  | -1.50629800 |
| H | 3.59118100  | 1.52211900  | -2.82267500 |
| C | 0.64205400  | -2.35482100 | -1.17878000 |
| C | -0.55643300 | -2.46750100 | -1.88280500 |
| C | 1.29418800  | -3.51071900 | -0.74136200 |
| C | -1.11416300 | -3.71569200 | -2.13188600 |
| C | 0.75164100  | -4.76582600 | -0.97788700 |
| C | -0.45068200 | -4.84703200 | -1.67259300 |
| H | -2.05231000 | -3.79696900 | -2.66685500 |

|    |             |             |             |
|----|-------------|-------------|-------------|
| H  | 1.25878800  | -5.65793900 | -0.63223300 |
| Cl | -1.37741500 | -1.03572200 | -2.36881300 |
| Cl | -1.14144500 | -6.40915800 | -1.97135400 |
| Cl | 2.79863800  | -3.37926900 | 0.10444600  |
| O  | 3.32154200  | 2.60696600  | -1.12898900 |
| C  | 0.71744000  | -0.76707300 | 1.56526200  |
| O  | 1.44145900  | -0.60202700 | 2.56258100  |
| C  | -0.62405800 | -1.21583100 | 1.54324100  |
| C  | -1.06910200 | -1.92284400 | 2.80470200  |
| H  | -1.02990100 | -1.56376600 | 0.59869000  |
| C  | -2.01475300 | -3.09213400 | 2.54027300  |
| H  | -0.17026100 | -2.27540800 | 3.32423400  |
| H  | -1.54367400 | -1.21692300 | 3.50029300  |
| H  | -2.24008900 | -3.62775600 | 3.46656200  |
| H  | -2.96022200 | -2.75362800 | 2.10829600  |
| H  | -1.55949800 | -3.80390000 | 1.84222000  |
| C  | -0.37198200 | 2.12175000  | 0.26287300  |
| O  | 0.35966200  | 2.14067400  | 1.26978400  |
| C  | -1.60860600 | 1.37539500  | 0.27061600  |
| C  | -1.84267900 | 0.60955900  | 1.43795400  |
| H  | -1.30412000 | 0.92114800  | 2.33133900  |
| C  | 0.11424900  | 2.90373000  | -0.92611700 |
| C  | 0.27265700  | 2.31583900  | -2.18213000 |
| C  | 0.57181400  | 4.20813700  | -0.71740400 |
| C  | 0.88065300  | 3.02580700  | -3.21553500 |
| H  | -0.08035600 | 1.30431300  | -2.34412600 |
| C  | 1.15400700  | 4.92513500  | -1.75554100 |
| H  | 0.46460800  | 4.64931600  | 0.26965300  |
| C  | 1.31515100  | 4.33083900  | -3.00693000 |
| H  | 1.00543600  | 2.55800500  | -4.18772900 |
| H  | 1.49015100  | 5.94405700  | -1.58971800 |
| H  | 1.77950200  | 4.88619200  | -3.81616100 |
| C  | -3.14780800 | -0.04632200 | 1.66561300  |
| C  | -3.74699000 | 0.01831900  | 2.92745500  |
| C  | -3.81854100 | -0.72239200 | 0.63698200  |
| C  | -4.99422000 | -0.55768300 | 3.15337700  |
| H  | -3.23712700 | 0.54415200  | 3.73038200  |
| C  | -5.06468500 | -1.29363800 | 0.85929100  |
| H  | -3.35127400 | -0.80171000 | -0.34175800 |
| C  | -5.65762600 | -1.21186200 | 2.11917600  |
| H  | -5.44874000 | -0.49072400 | 4.13664700  |
| H  | -5.57431300 | -1.80806200 | 0.05079100  |
| H  | -6.63089000 | -1.65970200 | 2.29250000  |
| C  | -2.65079400 | 1.65474400  | -0.75593500 |

|   |             |            |             |
|---|-------------|------------|-------------|
| O | -2.46828700 | 1.55109500 | -1.96290200 |
| C | -3.97917100 | 2.20586100 | -0.29547600 |
| C | -4.14293100 | 2.83766700 | 0.93870500  |
| C | -5.06226800 | 2.12775400 | -1.17473300 |
| C | -5.37813000 | 3.37024500 | 1.29463400  |
| H | -3.29827700 | 2.91713800 | 1.61643000  |
| C | -6.29858600 | 2.65040100 | -0.81648300 |
| H | -4.91135400 | 1.65096100 | -2.13786200 |
| C | -6.45842700 | 3.27224100 | 0.42147000  |
| H | -5.49720300 | 3.86311700 | 2.25427600  |
| H | -7.13824300 | 2.57695500 | -1.50050200 |
| H | -7.42313500 | 3.68296000 | 0.70320200  |

TS4SS-HDA

|   |             |             |             |
|---|-------------|-------------|-------------|
| C | 0.42098600  | -1.55255700 | 1.03039300  |
| O | 1.50372600  | -1.96060100 | 1.50485900  |
| C | -0.85181300 | -1.58695100 | 1.59074200  |
| C | -1.10579000 | -2.53083000 | 2.73386300  |
| H | -1.69809800 | -1.24805100 | 0.99907500  |
| C | -2.55686600 | -2.50780800 | 3.20563500  |
| H | -0.42071700 | -2.31361100 | 3.56221200  |
| H | -0.84512400 | -3.54894600 | 2.40627700  |
| H | -2.72205000 | -3.22487800 | 4.01366700  |
| H | -3.23415900 | -2.75978000 | 2.38279200  |
| H | -2.84626900 | -1.51881600 | 3.57332300  |
| C | -2.08893000 | 1.76398400  | 0.89469400  |
| O | -2.92498300 | 0.86442200  | 0.79983000  |
| C | -0.76182500 | 1.51293700  | 1.49753700  |
| C | -0.81510500 | 0.53796300  | 2.51569800  |
| H | -1.84901100 | 0.28524300  | 2.74059400  |
| C | -2.49986400 | 3.15529800  | 0.49718200  |
| C | -1.92586300 | 4.29295300  | 1.06863100  |
| C | -3.54299100 | 3.29913300  | -0.42080600 |
| C | -2.36959000 | 5.55963200  | 0.70229700  |
| H | -1.13954500 | 4.18418900  | 1.80970200  |
| C | -3.97801900 | 4.56437000  | -0.79680800 |
| H | -4.00101200 | 2.40183100  | -0.82444600 |
| C | -3.38827100 | 5.69719300  | -0.23780800 |
| H | -1.92208300 | 6.43979100  | 1.15261800  |
| H | -4.77891800 | 4.67073400  | -1.52169000 |
| H | -3.72860700 | 6.68619600  | -0.52847100 |
| C | 0.05293300  | 0.23904100  | 3.67229300  |
| C | 1.44769600  | 0.09427300  | 3.66125100  |
| C | -0.62304300 | 0.00337500  | 4.88378700  |



|   |             |             |             |
|---|-------------|-------------|-------------|
| C | 2.12953300  | -0.26476700 | 4.81910900  |
| H | 1.99452000  | 0.27376100  | 2.75148700  |
| C | 0.06097100  | -0.32965900 | 6.04557500  |
| H | -1.70562100 | 0.09617400  | 4.91046300  |
| C | 1.44642900  | -0.47113100 | 6.01383400  |
| H | 3.20785800  | -0.38180000 | 4.78389500  |
| H | -0.48645800 | -0.48944300 | 6.96889300  |
| H | 1.98918600  | -0.74346400 | 6.91362100  |
| C | 0.45347900  | 2.16951600  | 1.04703000  |
| O | 1.53111800  | 2.10027700  | 1.65284600  |
| C | 0.47886100  | 2.89990200  | -0.27171400 |
| C | -0.19612400 | 2.41909500  | -1.39164600 |
| C | 1.30442700  | 4.01891600  | -0.40066500 |
| C | -0.06290200 | 3.05003500  | -2.62521100 |
| H | -0.82339900 | 1.53762400  | -1.30256100 |
| C | 1.42794700  | 4.66124800  | -1.62628500 |
| H | 1.84376200  | 4.37112000  | 0.47393100  |
| C | 0.74576800  | 4.17659400  | -2.74242300 |
| H | -0.58862300 | 2.65566000  | -3.49068000 |
| H | 2.05974700  | 5.53946300  | -1.71577700 |
| H | 0.84825400  | 4.67629900  | -3.70073600 |
| C | 3.96137300  | -1.02226000 | -0.56654400 |
| C | 5.11545100  | -0.40094700 | -1.03966400 |
| C | 6.21529400  | -1.16803500 | -1.41321500 |
| C | 6.13493800  | -2.55478000 | -1.30744300 |
| C | 4.97727200  | -3.16845500 | -0.82358200 |
| C | 3.87615800  | -2.40542600 | -0.44177200 |
| C | 2.90246800  | 0.00919800  | -0.23601800 |
| C | 3.44938000  | 1.34396300  | -0.85143900 |
| C | 4.96125500  | 1.09906200  | -1.04122900 |
| H | 7.11881600  | -0.69436600 | -1.78570500 |
| H | 6.98309500  | -3.16512900 | -1.60119100 |
| H | 4.93777500  | -4.24949900 | -0.73824600 |
| H | 2.97805500  | -2.85671900 | -0.03095400 |
| H | 3.22721300  | 2.16715700  | -0.17200300 |
| H | 5.30374200  | 1.57738600  | -1.96345200 |
| H | 2.72782700  | 0.11496800  | 0.83408400  |
| H | 5.52297900  | 1.54443400  | -0.21292200 |
| C | 1.41486600  | -0.14516100 | -2.19480600 |
| C | 0.54174000  | -0.97079200 | -0.36511300 |
| N | 0.27437000  | -0.63502900 | -2.58089200 |
| N | 1.61726200  | -0.34155400 | -0.85592200 |
| N | -0.26292700 | -1.14594400 | -1.43029300 |
| C | 2.44314600  | 0.65650900  | -2.92719500 |

|    |             |             |             |
|----|-------------|-------------|-------------|
| H  | 3.29298100  | 0.02027800  | -3.21214300 |
| H  | 2.00094300  | 1.09528700  | -3.82245400 |
| C  | -1.44068200 | -1.94700100 | -1.49216200 |
| C  | -1.36668600 | -3.31707400 | -1.20780900 |
| C  | -2.67421400 | -1.39767100 | -1.85084400 |
| C  | -2.50813300 | -4.10486800 | -1.18864600 |
| C  | -3.82630600 | -2.17599400 | -1.84299000 |
| C  | -3.73000700 | -3.51490000 | -1.49149600 |
| H  | -2.44000400 | -5.15933100 | -0.95201200 |
| H  | -4.77945600 | -1.73483600 | -2.10645100 |
| Cl | 0.15958500  | -4.07119600 | -0.90062700 |
| Cl | -5.16518000 | -4.48504400 | -1.45893100 |
| Cl | -2.80502800 | 0.24785300  | -2.35219000 |
| O  | 2.82214300  | 1.71197900  | -2.07385800 |

TS5R-Stetter

|   |             |             |             |
|---|-------------|-------------|-------------|
| C | -0.47752500 | 4.05829600  | -0.16571200 |
| C | -0.39314800 | 5.31976100  | 0.41783700  |
| C | -0.77414500 | 6.44773000  | -0.30461800 |
| C | -1.23323200 | 6.28887400  | -1.61038400 |
| C | -1.29480500 | 5.02203500  | -2.19589900 |
| C | -0.90950300 | 3.89247200  | -1.47799400 |
| C | -0.01493700 | 2.98522600  | 0.79236800  |
| C | 0.20452500  | 3.72889100  | 2.15670900  |
| C | 0.17102800  | 5.23796200  | 1.81461000  |
| H | -0.71278700 | 7.43620700  | 0.14142900  |
| H | -1.53697700 | 7.15973500  | -2.18269200 |
| H | -1.63763100 | 4.91918700  | -3.22048800 |
| H | -0.91977700 | 2.90387300  | -1.92833700 |
| H | 1.16298400  | 3.41750300  | 2.57345700  |
| H | -0.42331900 | 5.77761100  | 2.55925500  |
| H | 0.92006300  | 2.51864800  | 0.47739500  |
| H | 1.18257200  | 5.65513600  | 1.84658500  |
| C | -2.10851700 | 2.11037200  | 1.76368900  |
| C | -1.18537800 | 0.75286900  | 0.29455500  |
| N | -2.96160400 | 1.14567500  | 1.67235200  |
| N | -1.01724600 | 1.93008900  | 0.95089400  |
| N | -2.39348100 | 0.29261400  | 0.73847800  |
| C | -2.07530400 | 3.29422400  | 2.67323100  |
| H | -2.38371300 | 4.20265700  | 2.13614800  |
| H | -2.74074400 | 3.13615500  | 3.52196700  |
| C | -3.27651100 | -0.57291700 | 0.04111800  |
| C | -3.67417300 | -1.79294300 | 0.59106100  |
| C | -3.79493300 | -0.19628100 | -1.20246800 |

|    |             |             |             |
|----|-------------|-------------|-------------|
| C  | -4.54458100 | -2.63605900 | -0.08972400 |
| C  | -4.65408200 | -1.02761300 | -1.90703200 |
| C  | -5.01561000 | -2.24160200 | -1.33572400 |
| H  | -4.83849000 | -3.58401900 | 0.34371000  |
| H  | -5.03787100 | -0.72775100 | -2.87406400 |
| Cl | -3.02683000 | -2.28799100 | 2.10976200  |
| Cl | -6.08947000 | -3.29360500 | -2.20505900 |
| Cl | -3.36559400 | 1.33718400  | -1.88236600 |
| O  | -0.75058600 | 3.38859300  | 3.15537200  |
| C  | -0.24355600 | 0.09141000  | -0.54555900 |
| O  | 0.48197800  | 0.97835400  | -1.31349600 |
| C  | -0.64274400 | -1.16588500 | -1.19915300 |
| C  | -0.25174000 | -1.52339900 | -2.42575000 |
| H  | -1.21416000 | -1.86820100 | -0.59773100 |
| C  | -0.55377500 | -2.85655400 | -3.03680500 |
| H  | 1.38577900  | 0.61121500  | -1.41228600 |
| H  | 0.34209800  | -0.82618900 | -3.01237400 |
| H  | -1.06790900 | -2.74673700 | -3.99734800 |
| H  | 0.37183400  | -3.40918300 | -3.23542800 |
| H  | -1.18050900 | -3.46419200 | -2.37764100 |
| C  | 2.84997100  | -1.37013800 | -0.83159400 |
| O  | 2.88342000  | -1.05174500 | -2.01472900 |
| C  | 2.40941200  | -0.37873100 | 0.19171400  |
| C  | 1.19170900  | -0.47728800 | 0.91564900  |
| H  | 1.07131600  | 0.40497200  | 1.54663500  |
| C  | 3.29154800  | -2.74286300 | -0.42451700 |
| C  | 3.62881100  | -3.03587900 | 0.89913200  |
| C  | 3.37839600  | -3.73772900 | -1.40210500 |
| C  | 4.04233500  | -4.31860700 | 1.24413800  |
| H  | 3.55142500  | -2.25501500 | 1.65090600  |
| C  | 3.77753800  | -5.02230900 | -1.05386300 |
| H  | 3.12617500  | -3.47938200 | -2.42578200 |
| C  | 4.10903100  | -5.31251400 | 0.27016200  |
| H  | 4.30393300  | -4.54500100 | 2.27257800  |
| H  | 3.83678800  | -5.79814200 | -1.81056500 |
| H  | 4.42256300  | -6.31578900 | 0.54165800  |
| C  | 0.64412800  | -1.68702900 | 1.58734700  |
| C  | 0.29787100  | -1.54809300 | 2.93852700  |
| C  | 0.52576500  | -2.95907600 | 1.00569600  |
| C  | -0.10089500 | -2.64294900 | 3.70037200  |
| H  | 0.37156600  | -0.56764200 | 3.40293600  |
| C  | 0.11330300  | -4.05056200 | 1.76122800  |
| H  | 0.76908900  | -3.10067200 | -0.04112700 |
| C  | -0.18796500 | -3.90214700 | 3.11392000  |

|   |             |             |             |
|---|-------------|-------------|-------------|
| H | -0.34158000 | -2.50873600 | 4.75036000  |
| H | 0.04016100  | -5.02645000 | 1.29137000  |
| H | -0.49396700 | -4.76093700 | 3.70303800  |
| C | 3.10631000  | 0.88959000  | 0.28081200  |
| O | 2.68931400  | 1.84367600  | 0.96188700  |
| C | 4.42511400  | 1.09119800  | -0.42111600 |
| C | 5.41054000  | 0.10533900  | -0.50285500 |
| C | 4.68762900  | 2.36184000  | -0.93892600 |
| C | 6.63122300  | 0.38178300  | -1.11122000 |
| H | 5.23633700  | -0.87769700 | -0.07440700 |
| C | 5.89858000  | 2.63305600  | -1.56502400 |
| H | 3.92594800  | 3.12831200  | -0.83897400 |
| C | 6.87431700  | 1.64189700  | -1.65193400 |
| H | 7.39383800  | -0.38886500 | -1.16266400 |
| H | 6.08462200  | 3.61858800  | -1.98043800 |
| H | 7.82369100  | 1.85218100  | -2.13452000 |

TS5S-Stetter

|   |             |            |             |
|---|-------------|------------|-------------|
| C | 0.50576500  | 3.75486600 | -1.12155300 |
| C | 0.90031100  | 5.05505700 | -0.81703700 |
| C | 0.73940400  | 6.07003100 | -1.75740600 |
| C | 0.18068000  | 5.75953700 | -2.99459400 |
| C | -0.20150900 | 4.45001400 | -3.29701000 |
| C | -0.03765000 | 3.43186700 | -2.36129000 |
| C | 0.75912400  | 2.82088100 | 0.03898400  |
| C | 1.23645100  | 3.75508100 | 1.21130000  |
| C | 1.49564900  | 5.13805000 | 0.56602100  |
| H | 1.04203300  | 7.08790200 | -1.52909100 |
| H | 0.04508900  | 6.54171400 | -3.73478100 |
| H | -0.62328400 | 4.22512000 | -4.27136700 |
| H | -0.30404900 | 2.40365200 | -2.58877700 |
| H | 2.14155700  | 3.33043800 | 1.64821600  |
| H | 1.05268700  | 5.92719000 | 1.18289300  |
| H | 1.52715000  | 2.07781700 | -0.16550900 |
| H | 2.57066400  | 5.33777900 | 0.51649200  |
| C | -1.40666700 | 2.69992700 | 1.21175500  |
| C | -0.95198600 | 0.89492800 | 0.03235500  |
| N | -2.47110000 | 1.98196100 | 1.34255600  |
| N | -0.46211100 | 2.10297400 | 0.41660700  |
| N | -2.19738900 | 0.85614000 | 0.58809100  |
| C | -1.02701100 | 3.97920700 | 1.88045900  |
| H | -1.15470700 | 4.83084900 | 1.19683200  |
| H | -1.64323800 | 4.13421300 | 2.76605400  |
| C | -3.29741800 | 0.05859700 | 0.18750800  |

|    |             |             |             |
|----|-------------|-------------|-------------|
| C  | -3.91994200 | -0.80059300 | 1.09560200  |
| C  | -3.80713800 | 0.14824900  | -1.11326700 |
| C  | -4.99369500 | -1.59460600 | 0.71024300  |
| C  | -4.86748200 | -0.64798800 | -1.52369700 |
| C  | -5.44381100 | -1.51410500 | -0.60126900 |
| H  | -5.46137900 | -2.26409700 | 1.42136100  |
| H  | -5.24349500 | -0.58062900 | -2.53692900 |
| Cl | -3.32613000 | -0.89971300 | 2.71111600  |
| Cl | -6.77443600 | -2.51117900 | -1.09867800 |
| Cl | -3.12162600 | 1.27294800  | -2.23433900 |
| O  | 0.31686000  | 3.83264700  | 2.29259500  |
| C  | -0.25742800 | -0.12618700 | -0.68569400 |
| O  | 0.65348700  | 0.42010800  | -1.56882800 |
| C  | -0.99757300 | -1.30573400 | -1.16925700 |
| C  | -0.75541000 | -1.90713500 | -2.33763000 |
| H  | -1.69845900 | -1.76118000 | -0.46959400 |
| C  | -1.43612800 | -3.16492900 | -2.78162400 |
| H  | 1.50575300  | -0.05337400 | -1.47137500 |
| H  | -0.02354600 | -1.46027500 | -3.00838200 |
| H  | -1.91355100 | -3.02945600 | -3.75772400 |
| H  | -0.71655100 | -3.98476800 | -2.88662900 |
| H  | -2.20126500 | -3.47606500 | -2.06463700 |
| C  | 2.45539500  | -2.12482900 | -0.96429100 |
| O  | 2.94184200  | -1.78566400 | -2.03943400 |
| C  | 2.23296200  | -1.14345100 | 0.12703800  |
| C  | 0.95517900  | -1.15945600 | 0.74423200  |
| H  | 0.43229900  | -2.08259300 | 0.50604900  |
| C  | 2.07962000  | -3.56790900 | -0.75800500 |
| C  | 2.00590600  | -4.14334800 | 0.51425700  |
| C  | 1.87434100  | -4.36559400 | -1.88658900 |
| C  | 1.71155000  | -5.49700800 | 0.65425200  |
| H  | 2.19423800  | -3.52857400 | 1.39086200  |
| C  | 1.57049600  | -5.71476800 | -1.74652600 |
| H  | 1.96164700  | -3.90335900 | -2.86525900 |
| C  | 1.48660300  | -6.28116300 | -0.47466100 |
| H  | 1.66247900  | -5.94021700 | 1.64374500  |
| H  | 1.40215800  | -6.32768400 | -2.62663400 |
| H  | 1.25313500  | -7.33556000 | -0.36460500 |
| C  | 0.57803000  | -0.74776800 | 2.12762900  |
| C  | -0.03251400 | -1.74303900 | 2.90685100  |
| C  | 0.76172700  | 0.51617900  | 2.70781700  |
| C  | -0.42919200 | -1.49874100 | 4.21734100  |
| H  | -0.19162500 | -2.72894900 | 2.47514100  |
| C  | 0.31837900  | 0.77560900  | 4.00035500  |

|   |             |             |             |
|---|-------------|-------------|-------------|
| H | 1.27384200  | 1.28548800  | 2.15150600  |
| C | -0.27198700 | -0.22865200 | 4.76469500  |
| H | -0.88409200 | -2.29482900 | 4.79915400  |
| H | 0.44986100  | 1.77330600  | 4.40796600  |
| H | -0.60251300 | -0.02393500 | 5.77818600  |
| C | 3.23259200  | -0.11632600 | 0.35186900  |
| O | 2.96428500  | 0.98600000  | 0.85155200  |
| C | 4.67624200  | -0.38785800 | 0.02128500  |
| C | 5.24198100  | -1.66375200 | 0.07727400  |
| C | 5.49113100  | 0.70812200  | -0.26947500 |
| C | 6.59931300  | -1.84025600 | -0.17010200 |
| H | 4.62488600  | -2.52102700 | 0.33268700  |
| C | 6.84467800  | 0.53184200  | -0.53112300 |
| H | 5.04146600  | 1.69544500  | -0.28498500 |
| C | 7.40139000  | -0.74455700 | -0.48182700 |
| H | 7.03212900  | -2.83400700 | -0.11597400 |
| H | 7.46693300  | 1.38826400  | -0.77100700 |
| H | 8.45925100  | -0.88556000 | -0.68060700 |

TS5R'-Stetter

|   |             |            |             |
|---|-------------|------------|-------------|
| C | -0.39793100 | 4.01727300 | -0.08476200 |
| C | -0.28975400 | 5.25216900 | 0.54968300  |
| C | -0.63585200 | 6.41640400 | -0.13171800 |
| C | -1.08381100 | 6.31938700 | -1.44738300 |
| C | -1.16784300 | 5.07858600 | -2.08388200 |
| C | -0.81730100 | 3.91312800 | -1.40705400 |
| C | 0.03162500  | 2.89639000 | 0.83219700  |
| C | 0.25486600  | 3.57909200 | 2.22752100  |
| C | 0.25794100  | 5.10097500 | 1.94717800  |
| H | -0.55638700 | 7.38517200 | 0.35299200  |
| H | -1.36119500 | 7.21871600 | -1.98810600 |
| H | -1.50051000 | 5.02496100 | -3.11552800 |
| H | -0.84507900 | 2.94309200 | -1.89550200 |
| H | 1.20189900  | 3.22996200 | 2.64078400  |
| H | -0.33167300 | 5.62314000 | 2.70786100  |
| H | 0.96079400  | 2.42562200 | 0.50273000  |
| H | 1.27819000  | 5.49315600 | 2.00542000  |
| C | -2.09137700 | 2.02861500 | 1.75038400  |
| C | -1.16013200 | 0.69137100 | 0.27062300  |
| N | -2.95010000 | 1.07137200 | 1.63174900  |
| N | -0.99434900 | 1.85881400 | 0.94306600  |
| N | -2.37712000 | 0.23196800 | 0.68745400  |
| C | -2.04159900 | 3.17912000 | 2.70111400  |
| H | -2.31793600 | 4.11504600 | 2.19509900  |

|    |             |             |             |
|----|-------------|-------------|-------------|
| H  | -2.72070800 | 3.00765000  | 3.53619300  |
| C  | -3.25936000 | -0.59656200 | -0.05651500 |
| C  | -3.71615700 | -1.81101400 | 0.45919900  |
| C  | -3.72542400 | -0.18552200 | -1.31007900 |
| C  | -4.59655400 | -2.61108100 | -0.25946200 |
| C  | -4.59286200 | -0.97387400 | -2.05254000 |
| C  | -5.01652100 | -2.18157200 | -1.51175600 |
| H  | -4.93674100 | -3.55407900 | 0.15005800  |
| H  | -4.93533500 | -0.64627000 | -3.02597800 |
| Cl | -3.13410500 | -2.35032200 | 1.98835600  |
| Cl | -6.10048500 | -3.18054500 | -2.42897100 |
| Cl | -3.22056400 | 1.33810600  | -1.95990400 |
| O  | -0.71930300 | 3.21804700  | 3.20092900  |
| C  | -0.20913000 | 0.02205900  | -0.55206800 |
| O  | 0.52244900  | 0.90220300  | -1.32203200 |
| C  | -0.59935900 | -1.27769000 | -1.12867200 |
| C  | -0.42607600 | -1.72443500 | -2.38076500 |
| H  | -1.02103000 | -1.97000700 | -0.40364400 |
| C  | 0.10069700  | -0.99429300 | -3.58087800 |
| H  | 1.38946500  | 0.48561200  | -1.50648800 |
| H  | -0.70561100 | -2.76337900 | -2.55280900 |
| H  | -0.45633900 | -1.29779200 | -4.47193400 |
| H  | 0.02743300  | 0.08657900  | -3.46940000 |
| H  | 1.15460900  | -1.24693800 | -3.74443200 |
| C  | 2.77319100  | -1.45821100 | -0.80015700 |
| O  | 2.79361700  | -1.12607100 | -1.98270100 |
| C  | 2.41360000  | -0.45285000 | 0.23451500  |
| C  | 1.18772200  | -0.46882500 | 0.95722100  |
| H  | 1.10428500  | 0.46916200  | 1.50779300  |
| C  | 3.14414900  | -2.85706400 | -0.42236900 |
| C  | 3.55241700  | -3.16811800 | 0.87700400  |
| C  | 3.09180500  | -3.85832000 | -1.39566100 |
| C  | 3.90114800  | -4.47487300 | 1.20264700  |
| H  | 3.58140700  | -2.37945700 | 1.62452500  |
| C  | 3.42535800  | -5.16640300 | -1.06527200 |
| H  | 2.78079000  | -3.58941200 | -2.40026900 |
| C  | 3.83068500  | -5.47411800 | 0.23390800  |
| H  | 4.21924700  | -4.71553600 | 2.21169100  |
| H  | 3.37243900  | -5.94752200 | -1.81696300 |
| H  | 4.09326000  | -6.49586100 | 0.49027200  |
| C  | 0.57378500  | -1.56660000 | 1.75167400  |
| C  | 0.08156000  | -1.20824100 | 3.01640500  |
| C  | 0.50105900  | -2.91844000 | 1.37954700  |
| C  | -0.39821400 | -2.16469500 | 3.90571700  |

|   |             |             |             |
|---|-------------|-------------|-------------|
| H | 0.10417400  | -0.16170900 | 3.31427400  |
| C | 0.01673600  | -3.87447700 | 2.26569300  |
| H | 0.83164400  | -3.23004100 | 0.39618100  |
| C | -0.41813400 | -3.50715500 | 3.53791200  |
| H | -0.75137700 | -1.85868000 | 4.88536100  |
| H | -0.01308300 | -4.91549000 | 1.95927800  |
| H | -0.78135600 | -4.25976800 | 4.23069900  |
| C | 3.14610800  | 0.79744100  | 0.26209200  |
| O | 2.77338100  | 1.79231600  | 0.91045200  |
| C | 4.46907300  | 0.92163100  | -0.45177800 |
| C | 5.40729700  | -0.11093200 | -0.50863300 |
| C | 4.79110700  | 2.16416900  | -1.00316200 |
| C | 6.63839700  | 0.09015300  | -1.12559700 |
| H | 5.18865600  | -1.07283000 | -0.05375500 |
| C | 6.01263300  | 2.36058000  | -1.63715200 |
| H | 4.06742000  | 2.96873300  | -0.92234500 |
| C | 6.94031900  | 1.32250600  | -1.69913100 |
| H | 7.36335900  | -0.71711700 | -1.15579400 |
| H | 6.24501700  | 3.32541700  | -2.07720500 |
| H | 7.89839500  | 1.47567100  | -2.18604800 |

TS5S'-Stetter

|   |             |            |             |
|---|-------------|------------|-------------|
| C | 0.37160700  | 3.75795400 | -1.01980400 |
| C | 0.71584700  | 5.06549800 | -0.68657700 |
| C | 0.53415500  | 6.09115300 | -1.61131000 |
| C | 0.00552500  | 5.78437200 | -2.86258000 |
| C | -0.32727400 | 4.46831500 | -3.19363400 |
| C | -0.14222200 | 3.43999200 | -2.27327700 |
| C | 0.64270100  | 2.81202500 | 0.12744800  |
| C | 1.06118700  | 3.74251000 | 1.32466400  |
| C | 1.28743000  | 5.14342400 | 0.70661700  |
| H | 0.79820500  | 7.11445700 | -1.36050300 |
| H | -0.14509400 | 6.57462600 | -3.59116000 |
| H | -0.72695700 | 4.24668600 | -4.17799500 |
| H | -0.37169900 | 2.40796200 | -2.52209900 |
| H | 1.97156800  | 3.34406600 | 1.77520200  |
| H | 0.81175600  | 5.90816200 | 1.32975400  |
| H | 1.44480800  | 2.10532800 | -0.07827400 |
| H | 2.35657500  | 5.37586400 | 0.67643900  |
| C | -1.53763700 | 2.58277400 | 1.25533300  |
| C | -0.99265400 | 0.82091300 | 0.05105300  |
| N | -2.57669900 | 1.82300800 | 1.34933900  |
| N | -0.55536500 | 2.03740400 | 0.46911600  |
| N | -2.24544100 | 0.72354900 | 0.57944400  |



|    |             |             |             |
|----|-------------|-------------|-------------|
| C  | -1.22392000 | 3.86613600  | 1.95013700  |
| H  | -1.37630400 | 4.72152800  | 1.27622900  |
| H  | -1.86283500 | 3.98075200  | 2.82575400  |
| C  | -3.30836400 | -0.10825000 | 0.14719700  |
| C  | -3.93204100 | -0.98365700 | 1.03920400  |
| C  | -3.79426200 | -0.02374500 | -1.16298100 |
| C  | -4.98472000 | -1.79385400 | 0.63087900  |
| C  | -4.83414000 | -0.83489200 | -1.59558000 |
| C  | -5.41352000 | -1.71369400 | -0.68763400 |
| H  | -5.45355300 | -2.47432200 | 1.33066200  |
| H  | -5.19199200 | -0.76959000 | -2.61547200 |
| Cl | -3.37275100 | -1.07710600 | 2.66774700  |
| Cl | -6.71970100 | -2.72908200 | -1.21291700 |
| Cl | -3.11064200 | 1.11801700  | -2.26854400 |
| O  | 0.11667800  | 3.77228800  | 2.38654300  |
| C  | -0.24638700 | -0.15787400 | -0.67787300 |
| O  | 0.66470400  | 0.44941600  | -1.51994500 |
| C  | -0.93152300 | -1.36372500 | -1.18177400 |
| C  | -0.77240800 | -1.94659000 | -2.37817500 |
| H  | -1.53303900 | -1.88843900 | -0.43975800 |
| C  | -0.00075500 | -1.44085500 | -3.56704600 |
| H  | 1.52452200  | -0.01275200 | -1.42847300 |
| H  | -1.26231200 | -2.91039100 | -2.50265500 |
| H  | 1.07863700  | -1.58070800 | -3.42935700 |
| H  | -0.29987500 | -1.98431200 | -4.46601000 |
| H  | -0.16481700 | -0.37437100 | -3.72925400 |
| C  | 2.49216700  | -2.09183400 | -0.93978100 |
| O  | 2.98321500  | -1.75291500 | -2.01522100 |
| C  | 2.25313200  | -1.11210200 | 0.14574000  |
| C  | 0.97003400  | -1.15666700 | 0.75760800  |
| H  | 0.47737300  | -2.09609900 | 0.52198900  |
| C  | 2.12070700  | -3.53644200 | -0.73624100 |
| C  | 2.07359300  | -4.11727000 | 0.53463700  |
| C  | 1.88186300  | -4.32644500 | -1.86355200 |
| C  | 1.77669700  | -5.47032300 | 0.67550400  |
| H  | 2.28185100  | -3.50596800 | 1.40930400  |
| C  | 1.57282200  | -5.67379100 | -1.72215700 |
| H  | 1.94558700  | -3.86155500 | -2.84270000 |
| C  | 1.51932000  | -6.24695200 | -0.45162600 |
| H  | 1.74989400  | -5.91822800 | 1.66376200  |
| H  | 1.37629700  | -6.28095800 | -2.60012800 |
| H  | 1.28285300  | -7.30068800 | -0.34126800 |
| C  | 0.57732200  | -0.76062000 | 2.14104700  |
| C  | -0.03469300 | -1.76627900 | 2.90603900  |

|   |             |             |             |
|---|-------------|-------------|-------------|
| C | 0.74809000  | 0.49914300  | 2.73373200  |
| C | -0.44728200 | -1.53459500 | 4.21375900  |
| H | -0.18152600 | -2.75027900 | 2.46563200  |
| C | 0.29058500  | 0.74553700  | 4.02388900  |
| H | 1.26411000  | 1.27274300  | 2.18707400  |
| C | -0.30312900 | -0.26810500 | 4.77295200  |
| H | -0.90355100 | -2.33796600 | 4.78443800  |
| H | 0.41116300  | 1.74053000  | 4.44107100  |
| H | -0.64618400 | -0.07360400 | 5.78428700  |
| C | 3.22888900  | -0.06288300 | 0.37018400  |
| O | 2.93728400  | 1.03518300  | 0.86733200  |
| C | 4.67878600  | -0.30582900 | 0.04453800  |
| C | 5.26939000  | -1.57018700 | 0.10669800  |
| C | 5.47337900  | 0.80512700  | -0.24606200 |
| C | 6.63081900  | -1.72114200 | -0.13458400 |
| H | 4.66844600  | -2.43856300 | 0.36270700  |
| C | 6.83118200  | 0.65423400  | -0.50170300 |
| H | 5.00481700  | 1.78356700  | -0.26603900 |
| C | 7.41255500  | -0.61087600 | -0.44625800 |
| H | 7.08257200  | -2.70614000 | -0.07535000 |
| H | 7.43776800  | 1.52184800  | -0.74149600 |
| H | 8.47386800  | -0.73154900 | -0.64003100 |
